# Supplementary material for: Scaling up integrated prevention campaigns for global health: costs and cost-effectiveness in 70 countries
Source: PubMed Central journal article supplement — BMJ Open. 2014 Jun 26;4(6):e003987. doi: 10.1136/bmjopen-2013-003987 (PMC4078786; doi:10.1136/bmjopen-2013-003987), 2014-06-26
Supplement: bmjopen-2013-003987.draft_revisions.pdf [file bmjopen-2013-003987.draft_revisions.pdf]

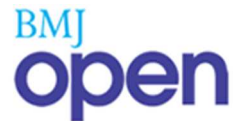

**Scaling up integrated prevention campaigns for global health: Costs and cost-effectiveness in 70 countries**

|                                 |                                                                                                                                                                                                                                                                                                                                                                                                                                                |
|---------------------------------|------------------------------------------------------------------------------------------------------------------------------------------------------------------------------------------------------------------------------------------------------------------------------------------------------------------------------------------------------------------------------------------------------------------------------------------------|
| Journal:                        | <i>BMJ Open</i>                                                                                                                                                                                                                                                                                                                                                                                                                                |
| Manuscript ID:                  | bmjopen-2013-003987                                                                                                                                                                                                                                                                                                                                                                                                                            |
| Article Type:                   | Research                                                                                                                                                                                                                                                                                                                                                                                                                                       |
| Date Submitted by the Author:   | 13-Sep-2013                                                                                                                                                                                                                                                                                                                                                                                                                                    |
| Complete List of Authors:       | Marseille, Elliot; Health Strategies International, Jiwani, Aliya; Health Strategies International, Raut, Abhishek; Johns Hopkins Bloomberg School of Public Health, International Health Verguet, Stephane; University of Washington, Department of Global Health Walson, Judd; University of Washington, Department of Global Health Kahn, James; University of California, San Francisco, Philip R. Lee Institute for Health Policy Studies |
| <b>Primary Subject Heading</b>: | Global health                                                                                                                                                                                                                                                                                                                                                                                                                                  |
| Secondary Subject Heading:      | Global health, Health economics, Health policy, Health services research, HIV/AIDS                                                                                                                                                                                                                                                                                                                                                             |
| Keywords:                       | HEALTH ECONOMICS, Health policy < HEALTH SERVICES ADMINISTRATION & MANAGEMENT, HIV & AIDS < INFECTIOUS DISEASES, Tropical medicine < INFECTIOUS DISEASES, Epidemiology < TROPICAL MEDICINE                                                                                                                                                                                                                                                     |
|                                 |                                                                                                                                                                                                                                                                                                                                                                                                                                                |

SCHOLARONE™  
Manuscripts

only

1  
2  
3  
4  
5  
6

## Scaling up integrated prevention campaigns for global health: Costs and cost-effectiveness in 70 countries

7 Elliot Marseille<sup>1\*</sup>, MPP, DrPH; Aliya Jiwani<sup>2</sup>, MPH; Abhishek Raut<sup>3</sup>, MD; Stéphane  
8 Verguet<sup>4</sup>, PhD; Judd Walson<sup>5</sup>, MD; James G. Kahn<sup>6</sup>, MD  
9

10  
11 Author affiliations:

12 <sup>1</sup> Health Strategies International, 555 59<sup>th</sup> street, Oakland, CA, 94609, USA

13 <sup>2</sup> Health Strategies International, 1138 North Vernon St., Arlington, VA, 22201, USA

14 <sup>3</sup> Department of International Health, Johns Hopkins Bloomberg School of Public Health,  
15 Baltimore, Maryland 21205

16 <sup>4</sup> Department of Global Health, University of Washington, Box 359909, 325 Ninth  
17 Avenue, Seattle, WA 98115, USA

18 <sup>5</sup> Departments of Global Health, Medicine, Pediatrics, and Epidemiology, University of  
19 Washington, Box 359909, 325 Ninth Avenue, Seattle, WA 98115, USA

20 <sup>6</sup> Philip R. Lee Institute for Health Policy Studies, University of California, San  
21 Francisco, 3333 California Street Suite 265, Box 0936, San Francisco, CA 94118; Global  
22 Health Sciences, University of California, San Francisco, 50 Beale Street, 12<sup>th</sup> floor, San  
23 Francisco, CA 94105  
24  
25  
26  
27

28 \*Corresponding author information:

29 Elliot Marseille

30 [emarseille@comcast.net](mailto:emarseille@comcast.net)

31 925-998-5745  
32  
33  
34  
35  
36  
37  
38  
39  
40  
41  
42  
43  
44  
45  
46  
47  
48  
49  
50  
51  
52  
53  
54  
55  
56  
57  
58  
59  
60

## Abstract

**Objectives.** This study estimated the health impact, cost, and cost-effectiveness of an integrated prevention campaign (IPC) focused on diarrhea, malaria, and HIV in 70 countries ranked by per-capita disability-adjusted life-year (DALY) burden for the three diseases.

**Methods.** We constructed a deterministic cost-effectiveness model portraying an IPC combining counseling and testing, cotrimoxazole prophylaxis, referral to treatment, and condom distribution for HIV prevention; bed nets for malaria prevention; and provision of household water filters for diarrhea prevention. We developed a mix of empirical and modeled cost and health impact estimates applied to all 70 countries. One-way, multi-way and scenario sensitivity analyses were conducted to document the strength of our findings. We used a societal perspective, discounted costs and DALYs at 3% per year, and denominated cost in 2012 U.S. dollars.

**Primary and secondary outcomes:** The primary outcome was cost-effectiveness expressed as net cost per DALY averted. Other outcomes included the cost of the IPC; net IPC costs adjusted for averted and additional medical costs; and DALYs averted.

**Results.** Implementation of the IPC in the 10 most cost-effective countries at 15% population coverage would cost \$583 million over three years (adjusted costs of \$398 million), averting 8.0 million DALYs. Extending IPC programs to all 70 of the identified high-burden countries at 15% coverage would cost an adjusted \$51.3 billion and avert 78.7 million DALYs. Incremental cost effectiveness ranged from \$49 per DALY averted for the 10 countries with the most favourable cost-effectiveness to \$119, \$181, \$335, \$1,692 and \$8,340 per DALY averted for each successive group of 10 countries respectively ordered by decreasing cost-effectiveness.

**Conclusion.** IPC appears to be cost-effective in many settings, and has the potential to substantially reduce the burden of disease in resource-poor countries. This study increases confidence that IPC can be an important new approach for enhancing global health.

## Strengths and limitations of this study.

### *Strengths*

- Synthesizes a large volume of epidemiological data from disparate sources into a unified method for projecting the consequence of IPC implementation in 70 countries.
- Links the “opportunity index” concept with cost-effectiveness.
- Provides a more comprehensive assessment of intervention potential than assessment of cost-effectiveness alone.
- Methods presented here may be applied to other disease areas and facilitate more objective resource allocation decision-making for global health.

### *Limitations*

- Incomplete availability of data relevant to the large number of countries analyzed.
- Infeasible to develop cost-effectiveness thresholds that reflected the full array of local public health options against which IPC could be considered.
- Regions or urban areas within countries may have costs and health benefits that depart from the overall country assessments.

## Background

For many years, vertical (disease-specific) programming has dominated the sphere of global health funding in an effort to tackle the areas of greatest need [1]. However, there is increasing recognition that, among diseases with complementary prevention strategies and overlapping populations, single-disease approaches to population health improvement create duplication of effort and miss important opportunities for synergies in health benefits and economies of scope [2]. Recent initiatives have therefore sought to integrate programs for multiple diseases, and many have demonstrated feasibility, efficiencies and success [3, 4].

A particularly promising example of integrated programming was a prevention campaign in Western Province, Kenya that targeted diarrhea, malaria, and HIV [5], three diseases that account for a substantial portion of the total disease burden in many parts of the developing world [6]. Over the course of one week, the campaign provided general health education, condoms, insecticide-treated bed nets (ITNs), point-of-use water filters, and HIV testing and counseling to more than 80% of the target population [5]. Those testing positive for HIV were offered on-site CD4 count determination, cotrimoxazole prophylaxis, and referral to comprehensive HIV care and treatment. The campaign yielded large health benefits and net economic savings [7] [8]. Large-scale expansion of this integrated prevention campaign (IPC) has the potential to deliver substantial health benefits and cost savings. In a separate study, we reviewed country-specific data for 70 low- and middle-income countries, finding that the opportunity for a diarrhea, malaria and HIV IPC is not limited to Kenya (Jiwani et al. unpublished, 2013). It is plausible that IPCs can have a large impact on health in many resource-limited settings.

While the cost-effectiveness of this IPC in Western Kenya has been established [8], the economic and health effects of a multi-country IPC initiative are unknown. Using the best available data, we estimated the costs, health outcomes, and cost-effectiveness of IPC implementation in the same 70 low- and middle-income countries. To support decision-making for IPC implementation, we also estimate the increases in budgets that would be required to cover increasing numbers of countries.

## Methods

### *Overview*

We modeled the health impact, cost, and cost-effectiveness of a diarrhea, malaria, and HIV IPC [5] in 70 countries by adapting a previously-published spreadsheet-based model that was applied to the original IPC in Western Kenya [8]. Countries were chosen for inclusion in the analysis based on two factors: they were classified as low- or middle-income as defined by the World Bank [9]; and they had a total DALY (Disability-adjusted-life-year) burden for the three diseases addressed by the IPC in the highest tertile of the 214 World Bank-defined economies (i.e.,  $\geq 87,000$  DALYs; assessed in a companion paper (Jiwani et al., under review, 2013 [9])). We derived incidence and case fatality rates for each country from published reports, using regional averages and other

1  
2  
3 approximations when country-specific estimates were missing. We developed a mix of  
4 empirical (where available) and modeled (projected from empirical data) cost estimates  
5 applied to all 70 countries. Key outcomes examined included the cost of the IPC; net IPC  
6 costs adjusting for averted and additional medical costs; deaths and disease episodes  
7 averted; DALYs averted due to prevention, and to earlier and more HIV care; and finally,  
8 cost-effectiveness expressed as net cost per DALY averted. We used a societal  
9 perspective, and discounted long-term costs and DALYs at 3% per year [10]. Costs were  
10 denominated in 2012 U.S. dollars.  
11  
12

### 13 *Detailed model features*

14 We adapted a Microsoft Excel spreadsheet that we had previously constructed to analyze  
15 the cost-effectiveness of the Kenya IPC. Details of the model have been published  
16 elsewhere [8]. The model estimates the health and cost benefits of prevention for malaria,  
17 diarrhea, and HIV separately. For HIV, it also estimates the DALYs averted and costs  
18 incurred due to earlier diagnosis and treatment arising from HIV testing. Cost-  
19 effectiveness of the IPC was compared to the cost-effectiveness of ART in each of the 70  
20 countries. This metric was selected since, with the current aspiration of universal access  
21 to ART [11], provision of ART is on the active policy agenda for most HIV-affected  
22 countries.  
23  
24  
25  
26

27 *Cost estimates and projection methods.* Campaign costs for the Kenya IPC were obtained  
28 from published empirical data supplemented by filter repair and replacement costs [7, 8].  
29 We estimated campaign costs for each country using the Kenya IPC as a benchmark,  
30 translating to other countries according to type of cost, as follows. Program costs were  
31 classified as commodity, personnel and other costs. Commodities were further  
32 categorized as tradable and non-tradable. Tradable commodities are those purchased on  
33 the international market and include bed nets, filters, and condoms, and required no  
34 adjustment from the dollar-denominated costs incurred by the Kenya IPC [7]. The cost of  
35 non-tradable items, primarily personnel, were adjusted according to the per-capita GDP  
36 ratio, in International dollars, between Kenya and each study country [12].  
37  
38  
39

40 For each country, we estimated the costs of averted medical care due to the IPC by  
41 adjusting the costs for health care incurred per fatal and non-fatal case in the Kenya  
42 campaign by the ratio of GDP per capita in the target country versus Kenya. We selected  
43 per capita GDP rather than per capita health care spending as the basis for these  
44 adjustments, because the latter reflects overall access to care and our model accounts for  
45 access separately: For malaria, we used global average rates of treatment access,  
46 estimated at 68% for malaria based on published literature [13-18]. For diarrhea, we used  
47 country-specific estimates based on demographic and health survey data on the percent of  
48 children under five years of age with diarrhea in the two weeks preceding the survey who  
49 received any kind of treatment for diarrhea [19]. We used an average rate of access to  
50 ART of 70%. This is considerably higher than the 56% access reported for sub-Saharan  
51 Africa [20] and reflects likely increases in access in the context of the global commitment  
52 to access [11].  
53  
54  
55  
56  
57  
58  
59  
60

1  
2  
3 We calculated the per person-year cost of ART for each country by using published  
4 estimates for countries where available [21-42]. The non-drug portion of each published  
5 unit cost figure was inflated to 2012 US dollars using the U.S. CPI [43]. We then derived  
6 from the set of published figures an average figure for low-income, lower middle-income  
7 excluding India, and upper-middle income countries as defined by the World Bank [9].  
8 We applied these country income-category averages to the larger set of countries for  
9 which published ART unit cost estimates were unavailable, according to their respective  
10 income categories. ART cost-effectiveness for each country was estimated by adjusting  
11 \$883 per DALY averted which is the average for 45 sites studied in Zambia [23]. To  
12 arrive at country-specific estimates we calculated the ratio of per-capita income between  
13 each country and Zambia and applied this factor to the average portion of overall ART  
14 costs for low-income countries which is non-tradable, 36.9%. This figure was derived  
15 from the ART unit cost studies described above which includes the breakdown of costs  
16 by major component.  
17  
18  
19  
20

21 *First versus second campaign health benefits.* The health benefits of a second campaign  
22 would be lower than that of the initial campaign. For malaria and diarrhea, this is due to  
23 the limited functional life of nets and filters. For HIV, this is due to interval HIV  
24 incidence lower than HIV prevalence during the initial campaign. For the second  
25 campaign we estimate that the incidence of malaria and HIV would decrease to 33% of  
26 baseline levels and that of diarrhea to decrease to 58%. (Details in technical supplement).  
27  
28

29 *Disease specific data and projection methods.* We obtained country estimates of the  
30 prevalence of HIV in the adult (15–49 years) population [44-46]. For each country, we  
31 derived estimates of the baseline cases of malaria per person-year by dividing WHO-  
32 adjusted estimates of the annual number of cases [47] by the total country population  
33 [48]. For diarrhea, we estimated the average number of cases per person-year in the  
34 overall population using DHS data on the number of cases per year in children under 5  
35 [49] (details in technical supplement) [50, 51]). Multiplying each estimate by the total  
36 population [48] yields the estimated number of cases in each country.  
37  
38  
39

40 We calculated country-specific case fatality rates for malaria and diarrhea as the number  
41 of deaths due to the disease [52, 53] divided by the number of cases. We set an upper-  
42 bound malaria case fatality rate of 15% based on published findings of a Delphi survey of  
43 malaria experts [54]. We assumed a case fatality rate for HIV of 100%.  
44  
45

46 Using a discount rate of 3% [10], we estimated the DALYs incurred with each fatal case  
47 of malaria and diarrhea at 28 based on life expectancy at age 25 in Kenya (the estimated  
48 average age of death from malaria and diarrhea) of 61 years [55]. We derived estimates  
49 of the DALYs incurred per non-fatal case of each disease as the product of the disability  
50 weight (0.191 for malaria and 0.105 for diarrhea) [56] and the average duration of each  
51 case (7 days for malaria [57]; 4.43 days for diarrhea, a severity weighted duration for  
52 children and adults [58]); or 0.0037 and 0.0013 DALYs for each non-fatal case of malaria  
53 and diarrhea, respectively. Assuming 70% access to ART, we estimated 10.6 DALYs  
54 incurred per HIV infection, and 8.8 discounted DALYs averted per treated case of HIV,  
55 an assumption based on 22 years of antiretroviral therapy (ART), average age of ART  
56  
57  
58  
59  
60

1  
2  
3 initiation of 35 years, and a life expectancy at age 35 in Kenya of 37 years [55]. Each  
4 untreated HIV case incurs 15.1 discounted DALYs.  
5  
6

7 *Household size and beneficiaries per household.* Using country-specific data of rural  
8 household size as reported in the most recent Demographic and Health Survey, divided  
9 by the number of participants per household as observed in the Kenya IPC campaign, we  
10 obtained the number of beneficiaries per campaign participant. For bednets, we assumed  
11 fewer incremental beneficiaries per participant on the assumption that there was some  
12 prior access to bednets, 15.1% on average, as observed in the Kenya campaign. For HIV  
13 we assumed the same number of adult participants on average, 2.5, as the basis for  
14 calculating the number of beneficiaries per campaign participant.  
15  
16

17 For the remaining health inputs, we assumed values equal to those used in the Kenya  
18 analysis for all countries [8]. See Table 1 for base case values and sources for data inputs.  
19  
20

21 **Table 1 about here**

22  
23 *Relationship of opportunity to cost-effectiveness*

24 In a companion article, we identified the countries in which scale-up of a diarrhea,  
25 malaria, and HIV IPC would be most beneficial, by summarizing country-specific  
26 epidemiological data related to the disease burden and shortfall in current intervention  
27 coverage (Jiwani et al, under review, 2013). We created three “opportunity indices,”  
28 ranking countries by 1) DALYs per capita across the three diseases of the IPC, 2) a sum  
29 of burden ranks for each disease, and 3) a composite of burden and intervention  
30 opportunity. Here, we extend this opportunity analysis by examining the relationship  
31 between a country’s opportunity rank (in DALYs per capita) and its cost-effectiveness for  
32 IPC implementation.  
33  
34

35  
36 *Sensitivity analyses.* To assess the effect of uncertainty in inputs, we conducted one-way  
37 and multi-way Monte Carlo sensitivity analyses for three countries: Kenya, a low-income  
38 country where the IPC trial was performed and is at the 44<sup>th</sup> percentile for cost-  
39 effectiveness of the 70 countries analyzed; Nigeria, a lower-middle income country at the  
40 75<sup>th</sup> percentile (relatively favorable); and Bangladesh, a low-income country at the 25<sup>th</sup>  
41 percentile. Each of 31 model inputs examined in the sensitivity analyses (Table 2) was  
42 assigned a beta distribution with alpha and beta parameters of 2, in order to ensure  
43 symmetry around the mean. Maximum and minimum values were set as 1.5 and 0.5 times  
44 the base case, except for access to malaria and diarrhea treatment (0.75 to 1.25 of base  
45 case) and access to HIV treatment (0.6 to 1.4 times base case). Figures in bold font reflect  
46 parameter values that vary by country. Finally, we examined the effect of variations in  
47 important inputs on the cost-effectiveness of IPC in all 70 countries grouped in order of  
48 cost-effectiveness.  
49  
50  
51

52  
53 **Table 2 about here**  
54  
55  
56  
57  
58  
59  
60



## Results

Across the 70 high opportunity countries, the cost-effectiveness of the first campaign ranges from \$7 (Guinea-Bissau) to \$15,886 (China) per DALY averted (IQR \$96 - \$1,071 per DALY averted) (Table 3). At \$182 per DALY averted, Pakistan is at the 50<sup>th</sup> percentile for cost-effectiveness. With the exception of Afghanistan, the 30 countries with the most favorable cost-effectiveness are in sub-Saharan Africa. The cost-effectiveness of IPC compares favorably to the cost-effectiveness of ART in 51 countries. The 30 countries with the lowest cost-effectiveness estimates are geographically more diverse and include only three in sub-Saharan Africa (Swaziland, South Africa, and Namibia). See Technical Supplement for detailed results.

As shown in Figure 1 per-capita disease burden as measured by the opportunity index is highly correlated with cost-effectiveness. See Technical Supplement for relationship between opportunity index and cost-effectiveness for campaign 2.

**Table 3 and Figure 1 about here.**

Table 4 displays the cumulative results, grouped in 10-country increments, assuming 15% population coverage, and moving from most to least attractive cost-effectiveness. IPC in the top 10 countries would cost \$583 million for the three-year campaign, with a net cost after adjusting for effects on health care spending of \$398 million for the first three-year campaign and \$468 million for the second and subsequent campaigns. The first and second campaigns would avert 8.0 and 5.7 million DALYs respectively with an average cost-effectiveness of \$49 and \$82 per DALY averted, respectively. As shown in the right-hand two columns, the incremental cost-effectiveness rises rapidly (becomes less favorable) after coverage of the top 50 countries. In particular, if expanding from the top 50 to 60 countries and from 60 to all 70 countries, large net incremental costs are associated with relatively modest increases in health benefits. The cost per DALY averted in expanding from 60 to 70 countries is \$8,340 and \$19,728 for campaigns 1 and 2, respectively.

For each stratum of 10 countries ranked from most to least cost-effective, Table 5 displays the median cost-effectiveness for the first three-year campaigns, for possible second campaigns, and for ART. The cost-effectiveness of the first campaign compares more favorably to ART by a wide margin for each of the 10-country strata. For the second campaign ART is more cost-effective than IPC for the 51<sup>st</sup> – 60<sup>th</sup> and for the 61<sup>st</sup> – 70<sup>th</sup> country, as ranked by IPC cost-effectiveness.

**Tables 4 and 5 about here.**

Results for Kenya, Bangladesh, and Nigeria illustrate reasons for variation across countries.

In Nigeria, the IPC cost-effectiveness ratio is \$94 per DALY averted, 18<sup>th</sup> of 70 countries ranked by cost-effectiveness. This result represents high health benefits for malaria and

1  
2  
3 diarrhea, and modest benefits for HIV. For every 1,000 IPC participants, the first  
4 campaign averts an estimated 13.4 deaths: 6.0 due to malaria, 3.4 due to diarrhea, and 4.0  
5 due to HIV. The campaign costs are \$40,479, with net costs of \$34,769 after offsetting  
6 savings from averted care needs.  
7

8  
9 In Kenya, cost-effectiveness is somewhat less attractive, at \$157 per DALY averted, 31<sup>st</sup>  
10 of 70 countries. This is due to lower malaria and diarrhea benefits than in Nigeria, and  
11 more discovered HIV. For every 1,000 IPC participants, the campaign averts an  
12 estimated 10.9 deaths: 1.6 due to malaria, 2.4 to diarrhea, and 7.0 to HIV. The campaign  
13 costs \$34,280. Although reduced disease creates offsetting savings in care needs, there  
14 are \$81,000 in *added* HIV costs due to earlier and additional detection of HIV. The net  
15 cost of the campaign is \$46,149, or \$157 per DALY averted. This is less than the \$883  
16 per DALY averted for ART in Kenya.  
17

18  
19 In Bangladesh, the IPC cost-effectiveness ratio is \$1,168 per DALY averted, 53<sup>rd</sup> of 70  
20 countries. This is due to lower health benefits overall. For every 1,000 IPC participants,  
21 the campaign averts an estimated 0.9 deaths: 0.1 due to malaria, 0.8 due to diarrhea, and  
22 only 0.1 due to HIV. The campaign costs are \$35,658. When adjusted for modest  
23 offsetting savings from averted care, the net cost of the campaign is \$30,236. Cost-  
24 effectiveness is comparable with the estimated \$1,046 per DALY averted for ART for  
25 HIV. See Table 4 of the technical supplement for detailed results for all three countries.  
26  
27

### 28 29 **Sensitivity analyses**

30 *One-way sensitivity analysis.* Figure 2 is a tornado graph of the sensitivity of IPC cost-  
31 effectiveness to the model inputs displayed in Table 2 for Nigeria. IPC participants per  
32 household had the greatest effect on IPC cost-effectiveness (range, \$126 per DALY  
33 averted), followed by the multiplier that reflects prevention of secondary HIV  
34 transmission, the duration of the prevention benefits of HIV interventions (range, \$122  
35 per DALY averted each), cost of the IPC campaign (range, \$110 per DALY averted), and  
36 the reduction in mortality due to reduced HIV transmission (range, \$83 per DALY  
37 averted).  
38  
39

### 40 41 **Figure 2 about here**

42  
43 For Bangladesh, the inputs with the greatest effect on cost-effectiveness are duration of  
44 benefits for diarrhea prevention and the baseline cases of diarrhea per 1,000 person-years  
45 (range, \$1,506 per DALY averted for both), campaign cost (range, \$1,377 per DALY  
46 averted), IPC participants per household (range, \$1,305 per DALY averted), and  
47 protective benefit against diarrhea mortality (range, \$1,140 per DALY averted). For  
48 Kenya, the variables with the most influence on cost-effectiveness are the multiplier that  
49 reflects prevention of secondary HIV transmission and the duration of the prevention  
50 benefits of HIV interventions (range, \$236 per DALY averted each), the reduction in  
51 mortality due to reduced HIV transmission (range, \$161 per DALY averted), cost of the  
52 IPC campaign (range, \$117 per DALY averted), and the number of participants per  
53 household (range, \$103 per DALY averted). See Technical Supplement Figures 2 and 3  
54 for one-way sensitivity analysis tornado graphs for Bangladesh and Kenya respectively.  
55  
56  
57  
58  
59  
60

1  
2  
3 Figure 3 shows how variation in three inputs affects incremental cost-effectiveness as  
4 each successive 10 countries are added to a scaled-up IPC program. Up to 50 countries,  
5 IPC remains cost-effective compared with ART even if the least favorable end of the  
6 input estimate range is used.  
7  
8

9  
10 **Figure 3 about here**

11  
12 *Multivariate Monte Carlo sensitivity analysis.* Table 6 displays the 80% confidence  
13 interval for a 20,000-trial simulation for three outcomes: DALYs averted, net costs, and  
14 net cost per DALY averted (cost-effectiveness). For Kenya and Nigeria the least  
15 favorable end of the cost-effectiveness range is more favorable than the cost-  
16 effectiveness of ART for HIV, \$304 versus \$883 per DALY averted for Kenya and \$208  
17 versus \$747 per DALY averted for Nigeria. For Bangladesh, the least favorable end of  
18 the cost-effectiveness range, \$2,547 is *less* favorable than the estimated \$1,046 per  
19 DALY averted for ART. For Nigeria the five most important variables in order of their  
20 correlation with cost-effectiveness (net cost per DALY averted) are, the duration of the  
21 HIV prevention benefits ( $r = -0.51$ ); prevention of secondary HIV transmission ( $r = -$   
22  $0.50$ ), the number of IPC participants per household ( $r = 0.33$ ), cost of the IPC campaign  
23 ( $r = 0.31$ ), and the reduction in mortality due to reduced HIV transmission ( $r = -0.24$ ),  
24 (Figure 4). See Technical Supplement figures 4 and 5 for multivariate sensitivity analyses  
25 correlations coefficients for Kenya and Bangladesh, for projection of IPC costs and  
26 benefits in Kenya for 30 years and for a scenario analysis in which the payer is not  
27 responsible for HIV program costs and benefits.  
28  
29  
30

31  
32 *Scenario Analysis: IPC cost-effectiveness with HIV costs and outcomes omitted.* Finally,  
33 we report on the cost and cost-effectiveness of the IPC program if HIV program costs and  
34 health benefits are ignored. These results reflect the perspective of a payer who assumes  
35 responsibility for the diarrhea and malaria components only. When future HIV-related  
36 costs and benefits are disregarded, including both additional care costs due to more and  
37 earlier detection and reductions in care costs due to prevention, the cost per DALY  
38 averted decreases from \$157 to \$129 in Kenya; from \$94 to \$31 in Nigeria; and increases  
39 from \$1,168 to \$819 in Bangladesh.  
40  
41  
42

43  
44 **Table 6 and Figure 4 about here.**  
45  
46

## 47 **Discussion**

48  
49 We examined the costs and health benefits of IPC for 70 countries with a high combined  
50 burden of diarrhea, malaria and HIV. Together these countries comprise 76% of the  
51 world population [48, 50] and 98% of its disease burden (author calculation based on the  
52 total DALYs attributed to diarrhea, malaria and HIV; Jiwani et al, under review, 2013). If  
53 implemented with 15% population coverage in the top 40 of the 70 countries as ordered  
54 by cost-effectiveness, 47.3 million DALYs could be averted at a net cost of \$4.9 billion,  
55 or \$104 per DALY averted. As shown in Table 3, this compares favorably with the cost-  
56  
57  
58  
59  
60

1  
2  
3 effectiveness of ART in each of those 40 countries. The DALYs averted constitute 58%  
4 of the disease burden due to HIV, malaria and diarrheal disease in these countries. \$4.9  
5 billion is considerably less than the President's request to the United States Congress for  
6 FY 2013 for \$6.4 billion for the PEPFAR program [76] and thus might be affordable  
7 from a donor's perspective, especially if the current trend of greater host country  
8 financial contribution to HIV programs continues. With the exception of Afghanistan, all  
9 30 of the countries in which IPC was most cost-effective are in sub-Saharan Africa and in  
10 51 countries, the cost-effectiveness of IPC compared favorably to ART.  
11  
12

13  
14 The cost-effectiveness of IPCs varies greatly among the 70 countries we examined. This  
15 wide divergence is due primarily to differences in disease burden and therefore to the  
16 higher levels of incremental health benefit generated per incremental dollar spent for  
17 prevention. For example, Nigeria ranks 4<sup>th</sup> of the 70 countries based on DALYs per  
18 capita in the three diseases of the IPC, and Bangladesh ranks 55<sup>th</sup>. As shown in Figure 1,  
19 per-capita disease burden as measured by the opportunity index is highly correlated with  
20 cost-effectiveness. In the case of a single disease-intervention pair such a finding would  
21 be unsurprising since the cost-effectiveness of most prevention interventions depend  
22 importantly on incidence. It is more noteworthy here since the relative prevalence of the  
23 three diseases varies greatly between the countries we studied, and the effect on medical  
24 care costs of intervening also varies substantially among the three diseases. In spite of  
25 this variability, the opportunity index is a reasonably good guide to cost-effectiveness.  
26  
27  
28

29 Costs of program delivery also matter. Swaziland, Botswana and South Africa have  
30 relatively unfavorable cost-effectiveness in relation to their disease burden. This is due  
31 primarily to their high per-capita GDP and thus the higher estimated non-commodity  
32 (mainly personnel) portion of their campaign costs. However, IPC cost-effectiveness still  
33 compares favorably to that of ART in all three countries.  
34  
35

36 Sensitivity of findings within each country reflects how the IPC interacts with local  
37 disease burden. Diarrhea is the largest contributor to the disease burden in Bangladesh,  
38 accounting for 87% of the DALYs averted by the IPC campaign. Not surprisingly, the  
39 most important determinant of cost-effectiveness was the estimated duration of the  
40 benefits of the water filter and the baseline incidence of diarrhea. Kenya has a far larger  
41 HIV epidemic, with a prevalence of 6.3% rather than 0.06% of adults as in Bangladesh.  
42 Accordingly, the largest determinants of IPC cost-effectiveness in Kenya were HIV-  
43 related in both one-way and multivariate sensitivity analyses. Nigeria's HIV prevalence  
44 of 3.6% is close to the average of 3.5% of the 70 countries examined. Nigeria's high IPC  
45 cost-effectiveness ranking is due to its high incidence of malaria and diarrhea, 252 and  
46 765 cases per 1,000 person-years respectively, compared with median values of 52 and  
47 521 for malaria and diarrhea respectively for the 70 countries studied.  
48  
49  
50

51  
52 Among the strengths of the current study are its synthesis of a large volume of  
53 epidemiological data from disparate sources into a unified method for projecting the  
54 consequence of IPC implementation in 70 countries, and the linking of the "opportunity  
55 index" concept with cost-effectiveness. This provides a more comprehensive assessment  
56 of intervention potential than assessment of cost-effectiveness alone. This data-driven  
57  
58  
59  
60

1  
2  
3 process may be applied to other disease areas and facilitate more objective resource  
4 allocation decision-making.  
5  
6

7 Limitations of our approach include incomplete availability of data relevant to the large  
8 number of countries analyzed. Methods for approximation were therefore necessary. For  
9 example, the costs of the campaigns themselves were extrapolated from empirical Kenya-  
10 specific data using per-capita GDP ratios between Kenya and the other countries to  
11 estimate the non- tradable commodity portion of costs. For other variables such as the  
12 protective effects of HIV prevention, bed nets and water filters where country-specific  
13 information was absent we employed wide ranges in the sensitivity analyses to ensure  
14 that we accounted for uncertainty, and this produced wide confidence intervals around  
15 the model outcomes.  
16  
17

18 Because we looked at a large number of countries, we could not explore specific  
19 countries in detail. It was infeasible to develop cost-effectiveness thresholds that reflected  
20 the full array of local public health options against which IPC could be considered.  
21 Comparing IPC with the estimated cost-effectiveness of ART for HIV does not account  
22 for the potential intervention options that are more efficient than both IPC and ART.  
23 Finally, there may be substantial regions or urban areas within countries that have costs,  
24 health benefits that depart from the overall country assessments to which our analysis is  
25 confined. The current analysis should not displace investigation of potential opportunities  
26 for efficient IPC implementation in high disease burden areas within countries.  
27  
28  
29

30 This study increases confidence that IPC can be an important new approach for  
31 enhancing global health. IPC appears to be cost-effective compared to ART for HIV in  
32 many settings, and has the potential to substantially reduce the burden of disease in poor  
33 countries. If implemented with 15% population coverage in the top 40 of the 70 countries  
34 as ordered by cost-effectiveness, 47.3 million DALYs could be averted at a net cost of  
35 \$4.9 billion, or \$104 per DALY averted. The specific countries, or number of countries, a  
36 donor may want to fund will depend on resource availability, and this analysis provides  
37 substantial guidance to decision makers aiming to predict the costs and benefits of  
38 various levels of investments in IPC programs. If taken to scale, IPC can be a highly  
39 efficient strategy for improving global health.  
40  
41  
42  
43  
44  
45  
46  
47  
48  
49  
50  
51  
52  
53  
54  
55  
56  
57  
58  
59  
60

## References

1. De Maeseneer, J., et al., *Strengthening primary care: addressing the disparity between vertical and horizontal investment*. Br J Gen Pract, 2008. **58**(546): p. 3-4.
2. Brady, M.A., P.J. Hooper, and E.A. Ottesen, *Projected benefits from integrating NTD programs in sub-Saharan Africa*. Trends Parasitol, 2006. **22**(7): p. 285-91.
3. Linehan, M., et al., *Integrated implementation of programs targeting neglected tropical diseases through preventive chemotherapy: proving the feasibility at national scale*. Am J Trop Med Hyg, 2011. **84**(1): p. 5-14.
4. Desormeaux, J., et al., *Widespread HIV counseling and testing linked to a community-based tuberculosis control program in a high-risk population*. Bull Pan Am Health Organ, 1996. **30**(1): p. 1-8.
5. Lugada, E., et al., *Rapid implementation of an integrated large-scale HIV counseling and testing, malaria, and diarrhea prevention campaign in rural Kenya*. PLoS One, 2010. **5**(8): p. e12435.
6. Murray, C.J., et al., *Disability-adjusted life years (DALYs) for 291 diseases and injuries in 21 regions, 1990-2010: a systematic analysis for the Global Burden of Disease Study 2010*. Lancet, 2012. **380**(9859): p. 2197-223.
7. Kahn, J.G., et al., *Cost of community integrated prevention campaign for malaria, HIV, and diarrhea in rural Kenya*. BMC Health Serv Res, 2011. **11**: p. 346.
8. Kahn, J.G., et al., *Integrated HIV testing, malaria, and diarrhea prevention campaign in Kenya: modeled health impact and cost-effectiveness*. PLoS One, 2012. **7**(2): p. e31316.
9. The World Bank. *How we Classify Countries*. 2012 [cited 2012 September 4]; Available from: <http://data.worldbank.org/about/country-classifications>.
10. The World Bank, *World Development Report 1993: Investing in Health* 1993.
11. United Nations General Assembly, *Resolution, Keeping the promise: united to achieve the Millennium Development Goals*, 2010.
12. Central Intelligence Agency. *Country comparison: GDP per capita (PPP)*. 2012 [cited 2013 March 5]; Available from: <https://http://www.cia.gov/library/publications/the-world-factbook/rankorder/2004rank.html>.
13. Mbonye, A.K., *Prevalence of childhood illnesses and care-seeking practices in rural Uganda*. ScientificWorldJournal, 2003. **3**: p. 721-30.
14. Smith, L.A., et al., *From fever to anti-malarial: the treatment-seeking process in rural Senegal*. Malar J, 2010. **9**: p. 333.
15. Hetzel, M.W., et al., *Obstacles to prompt and effective malaria treatment lead to low community-coverage in two rural districts of Tanzania*. BMC Public Health, 2008. **8**: p. 317.
16. Littrell, M., et al., *Monitoring fever treatment behaviour and equitable access to effective medicines in the context of initiatives to improve ACT access: baseline results and implications for programming in six African countries*. Malar J, 2011. **10**: p. 327.
17. Alba, S., et al., *Improvements in access to malaria treatment in Tanzania following community, retail sector and health facility interventions -- a user perspective*. Malar J, 2010. **9**: p. 163.

18. Sumba, P.O., et al., *Malaria treatment-seeking behaviour and recovery from malaria in a highland area of Kenya*. Malar J, 2008. 7: p. 245.
19. ICF International. *STATcompiler - % of children under 5 with diarrhea in 2 wks preceding survey who received any kind of treatment*. 2012 [cited 2012 September]; Available from: <http://statcompiler.com/>.
20. UNAIDS, *Sub-Saharan Africa, regional fact sheet*, 2012.
21. Galarraga, O., et al., *Unit costs for delivery of antiretroviral treatment and prevention of mother-to-child transmission of HIV: a systematic review for low- and middle-income countries*. Pharmacoeconomics, 2011. 29(7): p. 579-99.
22. Menzies, N.A., et al., *The cost of providing comprehensive HIV treatment in PEPFAR-supported programs*. AIDS, 2011.
23. Marseille, E., et al., *Taking ART to scale: determinants of the cost and cost-effectiveness of antiretroviral therapy in 45 clinical sites in Zambia*. PLoS One, 2012. 7(12): p. e51993.
24. Marseille, E., et al., *The cost effectiveness of home-based provision of antiretroviral therapy in rural Uganda*. Appl Health Econ Health Policy, 2009. 7(4): p. 229-43.
25. Hounton, S.H., et al., *Costing universal access of highly active antiretroviral therapy in Benin*. AIDS Care, 2008. 20(5): p. 582-7.
26. Bikilla, A.D., et al., *Cost estimates of HIV care and treatment with and without anti-retroviral therapy at Arba Minch Hospital in southern Ethiopia*. Cost Eff Resour Alloc, 2009. 7: p. 6.
27. Kombe, G., et al., *Human and financial resource requirements for scaling up HIV/AIDS services in Ethiopia*, 2004, Partners for Health Reformplus Project: Bethesda, MA.
28. Koenig, S.P., et al., *The cost of antiretroviral therapy in Haiti*. Cost Eff Resour Alloc, 2008. 6: p. 3.
29. Jaffar, S., et al., *Rates of virological failure in patients treated in a home-based versus a facility-based HIV-care model in Jinja, southeast Uganda: a cluster-randomised equivalence trial*. Lancet, 2009. 374(9707): p. 2080-9.
30. Gupta, I., M. Trivedi, and S. Kandamuthan, *Recurrent costs of India's free ART program*, in *HIV and AIDS in South Asia: an economic development risk.*, M. Haacker and M. Claeson, Editors. 2009, World Bank: Washington, DC. p. xxvi, 244.
31. John, K.R., N. Rajagopalan, and K.V. Madhuri, *Brief communication: economic comparison of opportunistic infection management with antiretroviral treatment in people living with HIV/AIDS presenting at an NGO clinic in Bangalore, India*. MedGenMed, 2006. 8(4): p. 24.
32. Kombe, G., D. Galaty, and C. Nwagbara, *Scaling Up Antiretroviral Treatment in the Public Sector in Nigeria: A Comprehensive Analysis of Resource Requirements*, 2004, The Partners for Health Reformplus Project: Bethesda, MD.
33. Aracena-Genao, B., et al., *Costs and benefits of HAART for patients with HIV in a public hospital in Mexico*. AIDS, 2008. 22 Suppl 1: p. S141-8.
34. Bautista, S.A., et al., *Costing of HIV/AIDS Treatment in Mexico*, 2003, The Partners for Health Reformplus Project: Bethesda, MD.

- 1  
2  
3  
4  
5  
6  
7  
8  
9  
10  
11  
12  
13  
14  
15  
16  
17  
18  
19  
20  
21  
22  
23  
24  
25  
26  
27  
28  
29  
30  
31  
32  
33  
34  
35  
36  
37  
38  
39  
40  
41  
42  
43  
44  
45  
46  
47  
48  
49  
50  
51  
52  
53  
54  
55  
56  
57  
58  
59  
60
35. Bautista-Arredondo, S., et al., *Costing of scaling up HIV/AIDS treatment in Mexico*. Salud Publica Mex, 2008. **50 Suppl 4**: p. S437-44.
  36. Cleary, S.M., D. McIntyre, and A.M. Boulle, *The cost-effectiveness of antiretroviral treatment in Khayelitsha, South Africa--a primary data analysis*. Cost Eff Resour Alloc, 2006. **4**: p. 20.
  37. Martinson, N., et al., *Costs of providing care for HIV-infected adults in an urban HIV clinic in Soweto, South Africa*. J Acquir Immune Defic Syndr, 2009. **50**(3): p. 327-30.
  38. Rosen, S., L. Long, and I. Sanne, *The outcomes and outpatient costs of different models of antiretroviral treatment delivery in South Africa*. Trop Med Int Health, 2008. **13**(8): p. 1005-15.
  39. Deghaye, N., R.A. Pawinski, and C. Desmond, *Financial and economic costs of scaling up the provision of HAART to HIV-infected health care workers in KwaZulu-Natal*. S Afr Med J, 2006. **96**(2): p. 140-3.
  40. Harling, G., L.G. Bekker, and R. Wood, *Cost of a dedicated ART clinic*. S Afr Med J, 2007. **97**(8): p. 593-6.
  41. Harling, G. and R. Wood, *The evolving cost of HIV in South Africa: changes in health care cost with duration on antiretroviral therapy for public sector patients*. J Acquir Immune Defic Syndr, 2007. **45**(3): p. 348-54.
  42. Kevany, S., et al., *Clinical and financial burdens of secondary level care in a public sector antiretroviral roll-out setting (G. F. Jooste Hospital)*. S Afr Med J, 2009. **99**(5): p. 320-5.
  43. US Dept. of Labor Bureau of Labor Statistics. *Consumer Price Index - All Urban Consumers (CPI-U)*. 2013 [cited 2013 August 14]; Available from: <ftp://ftp.bls.gov/pub/special.requests/cpi/cpiat.txt>.
  44. Gapminder, *Data in Gapminder World*, in *Estimated HIV prevalence % (ages 15-49)*.
  45. Ethiopia Federal HIV/AIDS Prevention and Control Office, *Country Progress Report on HIV/AIDS Response: Federal Democratic Republic of Ethiopia*, 2012.
  46. Republique Democratique Du Congo - Programme National Multisectoriel de Lutte Contre le Sida (PNMLS), *Rapport d'Activite Sure la Riposte au VIH/SIDA en R.D.Congo* 2012.
  47. Cibulskis, R.E., et al., *Worldwide incidence of malaria in 2009: estimates, time trends, and a critique of methods*. PLoS Med, 2011. **8**(12): p. e1001142.
  48. The World Bank, *Population, total*.
  49. Fischer Walker, C.L., et al., *Diarrhea incidence in low- and middle-income countries in 1990 and 2010: a systematic review*. BMC Public Health, 2012. **12**: p. 220.
  50. UN Department of Economic and Social Affairs - Population Division, *World Population Prospects, 2010 Revision*, 2010.
  51. UNICEF, *The State of the World's Children 2011. Table 6: Demographic Indicators: under 5 population (2010)*, 2011.
  52. Institute for Health Metrics and Evaluation. *Malaria Mortality Estimates by Country 1980-2010*. 2009 [cited 2012 September]; Available from: <http://www.healthmetricsandevaluation.org/ghdx/record/malaria-mortality-estimates-country-1980-2010>.



- 1  
2  
3  
4  
5  
6  
7  
8  
9  
10  
11  
12  
13  
14  
15  
16  
17  
18  
19  
20  
21  
22  
23  
24  
25  
26  
27  
28  
29  
30  
31  
32  
33  
34  
35  
36  
37  
38  
39  
40  
41  
42  
43  
44  
45  
46  
47  
48  
49  
50  
51  
52  
53  
54  
55  
56  
57  
58  
59  
60
53. World Health Organization, *Global Health Observatory Data Repository in Global Burden of Disease: Table 1 - Estimated total deaths, by cause, sex, and WHO Member State (2008). Deaths from diarrhoeal diseases*. 2011.
  54. Lubell, Y., et al., *Likely health outcomes for untreated acute febrile illness in the tropics in decision and economic models; a Delphi survey*. PLoS One, 2011. **6**(2): p. e17439.
  55. World Health Statistics 2012. *Life tables for WHO Member States*. 2009 [cited 2012 December 13]; Available from: [http://www.who.int/healthinfo/statistics/mortality\\_life\\_tables/en/](http://www.who.int/healthinfo/statistics/mortality_life_tables/en/).
  56. Mathers, C.D., A.D. Lopez, and C.J.L. Murray, *The Burden of Disease and Mortality by Condition: Data, Methods, and Results for 2001*, in *Global Burden of Disease and Risk Factors*, A.D. Lopez, et al., Editors. 2006: Washington (DC).
  57. Snow, R., et al., *The Public Health Burden of Plasmodium falciparum Malaria in Africa: Deriving the Numbers*. , in *Disease Control Priorities Project Working Paper No. 112003*, Fogarty International Center, National Institutes of Health: Bethesda, Maryland.
  58. Lamberti, L.M., C.L. Fischer Walker, and R.E. Black, *Systematic review of diarrhea duration and severity in children and adults in low- and middle-income countries*. BMC Public Health, 2012. **12**: p. 276.
  59. Walensky, R.P., et al., *When to start antiretroviral therapy in resource-limited settings*. Ann Intern Med, 2009. **151**(3): p. 157-66.
  60. Mermin, J., et al., *Effect of co-trimoxazole prophylaxis on morbidity, mortality, CD4-cell count, and viral load in HIV infection in rural Uganda*. Lancet, 2004. **364**(9443): p. 1428-34.
  61. Ayieko, P., et al., *The economic burden of inpatient paediatric care in Kenya: household and provider costs for treatment of pneumonia, malaria and meningitis*. Cost Eff Resour Alloc, 2009. **7**: p. 3.
  62. World Health Organization, *Global Burden of Disease. Table 1: Estimated total deaths ('000), by cause, sex and WHO Member State, 2008*, 2011.
  63. Lengeler, C., *Insecticide-treated bed nets and curtains for preventing malaria*. Cochrane Database Syst Rev, 2004(2): p. CD000363.
  64. Clasen, T., et al., *Cost-effectiveness of water quality interventions for preventing diarrhoeal disease in developing countries*. J Water Health, 2007. **5**(4): p. 599-608.
  65. Denison, J.A., et al., *HIV voluntary counseling and testing and behavioral risk reduction in developing countries: a meta-analysis, 1990--2005*. AIDS Behav, 2008. **12**(3): p. 363-73.
  66. Weller, S. and K. Davis, *Condom effectiveness in reducing heterosexual HIV transmission*. Cochrane Database Syst Rev, 2002(1): p. CD003255.
  67. Smith, D.L., et al., *Infectious disease. Solving the Sisyphean problem of malaria in Zanzibar*. Science, 2011. **332**(6036): p. 1384-5.
  68. Kahn, J.G., E. Marseille, and B. Auvert, *Cost-effectiveness of male circumcision for HIV prevention in a South African setting*. PLoS Med, 2006. **3**(12): p. e517.
  69. Mulligan, J.A., J. Yukich, and K. Hanson, *Costs and effects of the Tanzanian national voucher scheme for insecticide-treated nets*. Malar J, 2008. **7**: p. 32.

- 1  
2  
3  
4  
5  
6  
7  
8  
9  
10  
11  
12  
13  
14  
15  
16  
17  
18  
19  
20  
21  
22  
23  
24  
25  
26  
27  
28  
29  
30  
31  
32  
33  
34  
35  
36  
37  
38  
39  
40  
41  
42  
43  
44  
45  
46  
47  
48  
49  
50  
51  
52  
53  
54  
55  
56  
57  
58  
59  
60
70. Kilian, A., et al., *Long-term field performance of a polyester-based long-lasting insecticidal mosquito net in rural Uganda*. Malar J, 2008. **7**: p. 49.
71. Clasen, T., et al., *Laboratory assessment of a gravity-fed ultrafiltration water treatment device designed for household use in low-income settings*. Am J Trop Med Hyg, 2009. **80**(5): p. 819-23.
72. Das, A. and T.S. Ravindran, *Factors affecting treatment-seeking for febrile illness in a malaria endemic block in Boudh district, Orissa, India: policy implications for malaria control*. Malar J, 2010. **9**: p. 377.
73. Lubell, Y., et al., *Cost-effectiveness of parenteral artesunate for treating children with severe malaria in sub-Saharan Africa*. Bull World Health Organ, 2011. **89**(7): p. 504-12.
74. Tate, J.E., et al., *Rotavirus disease burden and impact and cost-effectiveness of a rotavirus vaccination program in kenya*. J Infect Dis, 2009. **200** Suppl 1: p. S76-84.
75. Shillcutt, S., et al., *Cost-effectiveness of malaria diagnostic methods in sub-Saharan Africa in an era of combination therapy*. Bull World Health Organ, 2008. **86**(2): p. 101-10.
76. Kaiser Family Foundation. *The U.S. President's Emergency Plan for AIDS Relief (PEPFAR)*. 2013 March 25, 2013 [cited 2013 August 12, 2013]; Available from: <http://kff.org/global-health-policy/fact-sheet/the-u-s-presidents-emergency-plan-for/>.

**Author contributions**

EM conceived and designed the study, conducted the analyses, and drafted and revised the paper. AJ provided data for the study, helped with the analyses and drafting and revision. AR provided data for the study and revised the draft paper. SV and JW critiqued the analysis helped with specifying data inputs, and revised the draft paper. JGK helped guide design and implementation of the study, helped with specifying data inputs and edited the paper.

**Conflicts of interest**

None declared.

Table 1. Base case values and sources for data inputs.

|                                                   | Malaria  | Diarrhea | HIV      |          | Source(s)                                                                |                                                        |                                                                                                     |
|---------------------------------------------------|----------|----------|----------|----------|--------------------------------------------------------------------------|--------------------------------------------------------|-----------------------------------------------------------------------------------------------------|
|                                                   | LLIN     | Filters  | VCT      | Condoms  | LLIN                                                                     | Filters                                                | VCT / condoms                                                                                       |
| <b>Health inputs</b>                              |          |          |          |          |                                                                          |                                                        |                                                                                                     |
| Campaign participant per household                | 2.5      |          |          |          | Post-campaign survey                                                     |                                                        |                                                                                                     |
| Number benefiting per campaign participant        | 1.563    | 1.840    | 0.950    | 0.361    | Post-campaign survey                                                     |                                                        |                                                                                                     |
| Baseline cases per year per individual benefiting | 0.057    | 0.542    | 0.004    | 0.009    | [47, 48]                                                                 | [49-51]                                                | [8, 59-61]<br>Post-campaign survey (see text)                                                       |
| Proportion of cases that are fatal                | 0.012    | 0.001    | 1        | 1        | [47, 52, 54]                                                             | [48, 49, 51, 58, 62]                                   | Assumption                                                                                          |
| DALYs incurred with each fatal case               | 28.0     | 28.0     | 15.1     | 15.1     | [55]                                                                     | [55]                                                   | [55]                                                                                                |
| DALYs incurred with each non-fatal case           | 0.0037   | 0.0012   | n/a      | n/a      | [56, 57]                                                                 | [56, 58]                                               | N/a                                                                                                 |
| Protective effect against mortality               | 0.50     | 0.63     | 0.50     | 0.26     | [63], expert opinion                                                     | [64]                                                   | [65, 66]                                                                                            |
| Protective effect against non-fatal cases         | 0.5      | 0.63     | n/a      | n/a      | [63]                                                                     | [64]                                                   | N/a                                                                                                 |
| Multiplier to capture secondary benefits          | n/a      | n/a      | 2        | 2        | [67]                                                                     | N/a                                                    | [68] (see text)                                                                                     |
| Years of benefit                                  | 3        | 3        | 1        | 1        | [69, 70] Adjusted to 3 years per post-campaign evaluation.               | [71] Adjusted to 3 years per post-campaign evaluation. | [65]                                                                                                |
| Access to care                                    | 0.684    | 0.678    | 0.700    | 0.700    | [13-17, 72]                                                              | [19]                                                   | Assumption                                                                                          |
| <b>Cost inputs</b>                                |          |          |          |          |                                                                          |                                                        |                                                                                                     |
| Campaign cost                                     | \$34,280 |          |          |          | [7] \$31,980 plus additional \$2,300 in revised filter maintenance costs |                                                        |                                                                                                     |
| Discount rate                                     | 3.0%     |          |          |          | [10]                                                                     |                                                        |                                                                                                     |
| Health care incurred with each fatality           | \$65     | \$104    | \$12,213 | \$12,213 | [61, 73]                                                                 | [74]                                                   | Authors' construction based on 22 years on ART at \$766 per person-year discounted at 3% per annum. |
| Health care incurred with each non-fatal case     | \$7.80   | \$7.00   | n/a      | n/a      | [75]                                                                     | [74]                                                   | N/a                                                                                                 |

**Table 2. Sensitivity analysis variables, base case, minimum and maximum values.** All variables have beta distributions with alpha and beta parameters of 2. Minimum and maximum values are 0.5 and 1.5 of base case values, respectively, except for access to diarrhea disease care and malaria care which have minimum and maximums of 0.6 and 1.4, and access to HIV ART which has a minimum and maximum of 0.75 and 1.25. Bold figures represent values that change with each country.

| Input parameter                     | Nigeria   |          |          | Kenya     |          |          | Bangladesh |          |          |
|-------------------------------------|-----------|----------|----------|-----------|----------|----------|------------|----------|----------|
|                                     | Base case | Min      | Max      | Base case | Min      | Max      | Base case  | Min      | Max      |
| Campaign cost                       | \$40,479  | \$20,239 | \$60,718 | \$34,280  | \$17,140 | \$51,420 | \$35,658   | \$17,829 | \$53,486 |
| Cost per fatality malaria           | \$97.50   | \$48.75  | \$146.25 | \$65.00   | \$32.50  | \$97.50  | \$72.22    | \$36.11  | \$108.33 |
| Cost per fatality diarrhea          | \$156.00  | \$78.00  | \$234.00 | \$104.00  | \$52.00  | \$156.00 | \$115.56   | \$57.78  | \$173.34 |
| Cost per non-fatal case malaria     | \$11.70   | \$5.85   | \$17.55  | \$7.80    | \$3.90   | \$11.70  | \$8.67     | \$4.33   | \$13.00  |
| Cost per non-fatal case diarrhea    | \$10.50   | \$5.25   | \$15.75  | \$7.00    | \$3.50   | \$10.50  | \$7.78     | \$3.89   | \$11.67  |
| Annual cost ART                     | \$938     | \$469    | \$1,407  | \$766     | \$383    | \$1,150  | \$766      | \$383    | \$1,150  |
| Discount rate                       | 0.03      | 0.015    | 0.045    | 0.03      | 0.015    | 0.045    | 0.03       | 0.015    | 0.045    |
| Access to care Diarrhea             | 0.565     | 0.424    | 0.706    | 0.678     | 0.509    | 0.848    | 0.663      | 0.497    | 0.829    |
| Access to care Malaria              | 0.684     | 0.513    | 0.854    | 0.684     | 0.513    | 0.855    | 0.684      | 0.513    | 0.854    |
| Access to ART                       | 0.7       | 0.42     | 0.98     | 0.7       | 0.42     | 0.98     | 0.7        | 0.42     | 0.98     |
| Years on ART                        | 22        | 11       | 33       | 22        | 11       | 33       | 22         | 11       | 33       |
| HIV prevalence                      | 0.036     | 0.018    | 0.054    | 0.063     | 0.032    | 0.095    | 0.0006     | 0.0003   | 0.0009   |
| Baseline cases p1000py Malaria      | 351.6     | 175.8    | 527.5    | 57.0      | 28.5     | 85.5     | 6.13       | 3.06     | 9.19     |
| Baseline cases p1000py Diarrhea     | 765.3     | 382.7    | 1148.0   | 542.0     | 271.0    | 813.0    | 299.81     | 149.91   | 449.72   |
| Propor fatal Malaria                | 0.008     | 0.004    | 0.012    | 0.012     | 0.006    | 0.018    | 0.004      | 0.002    | 0.006    |
| Propor fatal Diarrhea               | 0.001     | 0.001    | 0.002    | 0.001     | 0.001    | 0.002    | 0.0007     | 0.0004   | 0.0011   |
| Participants per HH                 | 2.5       | 1.25     | 3.75     | 2.5       | 1.25     | 3.75     | 2.5        | 1.25     | 3.75     |
| DALYs fatal malaria                 | 27.8      | 13.9     | 41.7     | 27.8      | 13.9     | 41.7     | 27.8       | 13.9     | 41.7     |
| DALYs fatal diarrhea                | 27.8      | 13.9     | 41.7     | 27.8      | 13.9     | 41.7     | 27.8       | 13.9     | 41.7     |
| DALYs non-fatal malaria             | 0.366     | 0.183    | 0.549    | 0.366     | 0.183    | 0.549    | 0.366      | 0.183    | 0.549    |
| DALYs non-fatal diarrhea            | 0.127     | 0.064    | 0.191    | 0.127     | 0.064    | 0.191    | 0.127      | 0.064    | 0.191    |
| Protect. mortality malaria          | 0.500     | 0.250    | 0.750    | 0.500     | 0.250    | 0.750    | 0.500      | 0.250    | 0.750    |
| Protect. mortality diarrhea         | 0.630     | 0.315    | 0.945    | 0.630     | 0.315    | 0.945    | 0.630      | 0.315    | 0.945    |
| Protect. non fatal malaria          | 0.500     | 0.250    | 0.750    | 0.500     | 0.250    | 0.750    | 0.500      | 0.250    | 0.750    |
| Protect. non fatal diarrhea         | 0.628     | 0.314    | 0.941    | 0.628     | 0.314    | 0.941    | 0.628      | 0.314    | 0.941    |
| Protect. mortality HIV transmission | 0.500     | 0.250    | 0.750    | 0.500     | 0.250    | 0.750    | 0.500      | 0.250    | 0.750    |
| Protect. mortality HIV acquisition  | 0.255     | 0.128    | 0.383    | 0.255     | 0.128    | 0.383    | 0.255      | 0.128    | 0.383    |
| Multiplier: Secondary effects HIV   | 2         | 1        | 3        | 2         | 1        | 3        | 2          | 1        | 3        |
| Duration of benefit malaria         | 3         | 1.5      | 4.5      | 3         | 1.5      | 4.5      | 3          | 1.5      | 4.5      |
| Duration of benefit diarrhea        | 3         | 1.5      | 4.5      | 3         | 1.5      | 4.5      | 3          | 1.5      | 4.5      |
| Duration of benefit HIV             | 1         | 0.5      | 1.5      | 1         | 0.5      | 1.5      | 1          | 0.5      | 1.5      |

**Table 3.** Summary costs and cost-effectiveness results per 1,000 IPC participants for 70 countries ordered from most favorable to least favorable cost-effectiveness (net cost per DALY averted). The grey highlighted cells indicate CE ratio is less favorable than investment in ART. Results shown are for the first 3-year campaign.

|    | Country            | World Bank income classification | DALYs per capita | Costs             |           | Disease averted |          | DALYs averted | Cost-effectiveness (CE)        |                           |           |
|----|--------------------|----------------------------------|------------------|-------------------|-----------|-----------------|----------|---------------|--------------------------------|---------------------------|-----------|
|    |                    |                                  |                  | IPC campaign cost | Net cost  | Deaths          | Episodes |               | Campaign cost per DALY averted | Net cost per DALY averted | CE of ART |
| 1  | Guinea-Bissau      | Low                              | 0.134            | \$29,459          | \$7,814   | 40.7            | 10,523   | 1,143.3       | \$26                           | \$7                       | \$1,005   |
| 2  | Senegal            | Low er middle                    | 0.050            | \$34,969          | \$12,190  | 10.7            | 5,735    | 306.0         | \$114                          | \$40                      | \$768     |
| 3  | Sierra Leone       | Low                              | 0.119            | \$31,525          | \$20,112  | 16.0            | 4,118    | 446.7         | \$71                           | \$45                      | \$764     |
| 4  | Burkina Faso       | Low                              | 0.126            | \$31,525          | \$22,206  | 16.4            | 4,124    | 459.4         | \$69                           | \$48                      | \$819     |
| 5  | Somalia            | Low                              | 0.121            | \$26,015          | \$22,754  | 16.8            | 3,682    | 470.5         | \$55                           | \$48                      | \$1,535   |
| 6  | Niger              | Low                              | 0.110            | \$28,081          | \$21,620  | 14.8            | 4,967    | 419.7         | \$67                           | \$52                      | \$1,095   |
| 7  | Mali               | Low                              | 0.124            | \$29,459          | \$23,016  | 15.9            | 4,222    | 445.8         | \$66                           | \$52                      | \$888     |
| 8  | Afghanistan        | Low                              | 0.057            | \$28,770          | \$18,906  | 12.7            | 4,146    | 356.6         | \$81                           | \$53                      | \$935     |
| 9  | Chad               | Low                              | 0.120            | \$35,658          | \$24,848  | 15.3            | 4,335    | 424.6         | \$84                           | \$59                      | \$807     |
| 10 | Lesotho            | Low er middle                    | 0.115            | \$35,658          | \$47,366  | 31.3            | 1,756    | 779.4         | \$46                           | \$61                      | \$738     |
| 11 | Guinea             | Low                              | 0.095            | \$29,459          | \$22,324  | 12.6            | 4,272    | 353.8         | \$83                           | \$63                      | \$928     |
| 12 | Congo, DR          | Low                              | 0.112            | \$24,637          | \$25,488  | 13.4            | 3,517    | 375.9         | \$66                           | \$68                      | \$1,493   |
| 13 | Sudan              | Low er middle                    | 0.057            | \$38,413          | \$15,241  | 6.9             | 4,907    | 198.8         | \$193                          | \$77                      | \$703     |
| 14 | Liberia            | Low                              | 0.092            | \$26,704          | \$25,526  | 11.9            | 3,401    | 332.6         | \$80                           | \$77                      | \$1,025   |
| 15 | Burundi            | Low                              | 0.118            | \$26,015          | \$33,639  | 14.3            | 2,267    | 389.9         | \$67                           | \$86                      | \$987     |
| 16 | Benin              | Low                              | 0.083            | \$33,591          | \$25,345  | 10.0            | 3,096    | 280.0         | \$120                          | \$91                      | \$910     |
| 17 | Côte d'Ivoire      | Low er middle                    | 0.084            | \$33,591          | \$35,069  | 14.1            | 4,021    | 387.2         | \$87                           | \$91                      | \$801     |
| 18 | Nigeria            | Low er middle                    | 0.133            | \$40,479          | \$34,769  | 13.4            | 3,102    | 369.3         | \$110                          | \$94                      | \$747     |
| 19 | Mozambique         | Low                              | 0.141            | \$30,147          | \$59,145  | 22.2            | 3,816    | 590.0         | \$51                           | \$100                     | \$1,109   |
| 20 | Ken. African Rep.  | Low                              | 0.105            | \$27,392          | \$37,525  | 13.8            | 2,819    | 373.3         | \$73                           | \$101                     | \$1,230   |
| 21 | Uganda             | Low                              | 0.105            | \$31,525          | \$40,192  | 14.9            | 3,492    | 399.8         | \$79                           | \$101                     | \$749     |
| 22 | Congo, Rep.        | Low er middle                    | 0.067            | \$54,254          | \$33,944  | 11.5            | 2,981    | 318.5         | \$170                          | \$107                     | \$756     |
| 23 | Togo               | Low                              | 0.075            | \$29,459          | \$32,147  | 10.4            | 2,849    | 288.7         | \$102                          | \$111                     | \$864     |
| 24 | Angola             | Upper middle                     | 0.088            | \$64,586          | \$35,794  | 11.5            | 3,268    | 320.8         | \$201                          | \$112                     | \$674     |
| 25 | Tanzania           | Low                              | 0.075            | \$33,591          | \$38,453  | 12.1            | 3,122    | 326.9         | \$103                          | \$118                     | \$935     |
| 26 | Zambia             | Low er middle                    | 0.128            | \$33,591          | \$69,806  | 21.8            | 3,107    | 564.3         | \$60                           | \$124                     | \$826     |
| 27 | Ethiopia           | Low                              | 0.057            | \$30,147          | \$29,630  | 8.6             | 1,986    | 235.7         | \$128                          | \$126                     | \$1,139   |
| 28 | Rwanda             | Low                              | 0.071            | \$31,525          | \$34,034  | 9.6             | 2,216    | 266.1         | \$118                          | \$128                     | \$768     |
| 29 | Malawi             | Low                              | 0.110            | \$28,081          | \$59,745  | 18.3            | 2,965    | 462.2         | \$61                           | \$129                     | \$996     |
| 30 | Cameroon           | Low er middle                    | 0.100            | \$37,724          | \$52,388  | 14.3            | 3,115    | 388.4         | \$97                           | \$135                     | \$741     |
| 31 | Kenya              | Low                              | 0.065            | \$34,280          | \$46,149  | 10.9            | 2,018    | 294.1         | \$117                          | \$157                     | \$883     |
| 32 | Mauritania         | Low er middle                    | 0.042            | \$36,346          | \$28,117  | 5.8             | 2,607    | 164.2         | \$221                          | \$171                     | \$955     |
| 33 | Yemen              | Low er middle                    | 0.025            | \$37,035          | \$21,139  | 4.3             | 3,128    | 122.9         | \$301                          | \$172                     | \$719     |
| 34 | Zimbabwe           | Low                              | 0.075            | \$25,326          | \$76,203  | 17.8            | 1,682    | 428.8         | \$59                           | \$178                     | \$1,731   |
| 35 | Pakistan           | Low er middle                    | 0.020            | \$41,856          | \$19,714  | 3.8             | 2,748    | 108.1         | \$387                          | \$182                     | \$904     |
| 36 | Ghana              | Low er middle                    | 0.063            | \$44,612          | \$35,624  | 6.8             | 1,966    | 189.9         | \$235                          | \$188                     | \$746     |
| 37 | Madagascar         | Low                              | 0.043            | \$28,770          | \$24,895  | 4.5             | 1,910    | 127.8         | \$225                          | \$195                     | \$1,025   |
| 38 | Eritrea            | Low                              | 0.033            | \$27,392          | \$26,438  | 4.3             | 1,942    | 120.5         | \$227                          | \$219                     | \$1,753   |
| 39 | Botswana           | Upper middle                     | 0.080            | \$137,595         | \$185,872 | 26.8            | 1,111    | 734.1         | \$187                          | \$253                     | \$577     |
| 40 | Haiti              | Low                              | 0.028            | \$30,836          | \$31,570  | 4.4             | 3,128    | 123.0         | \$251                          | \$257                     | \$869     |
| 41 | Swaziland          | Low er middle                    | 0.150            | \$58,387          | \$198,392 | 29.1            | 2,230    | 724.2         | \$81                           | \$274                     | \$632     |
| 42 | Guatemala          | Low er middle                    | 0.016            | \$57,698          | \$22,134  | 2.4             | 3,143    | 70.1          | \$823                          | \$316                     | \$627     |
| 43 | South Africa       | Upper middle                     | 0.097            | \$99,713          | \$180,284 | 21.5            | 1,150    | 561.0         | \$178                          | \$321                     | \$582     |
| 44 | Gabon              | Upper middle                     | 0.060            | \$29,826          | \$84,306  | 9.3             | 1,876    | 255.0         | \$117                          | \$331                     | \$613     |
| 45 | India              | Low er middle                    | 0.027            | \$48,744          | \$34,973  | 3.7             | 1,255    | 104.9         | \$464                          | \$333                     | \$733     |
| 46 | Myanmar            | Low                              | 0.026            | \$31,525          | \$28,249  | 2.9             | 1,306    | 83.7          | \$377                          | \$337                     | \$1,354   |
| 47 | Papua New Guinea   | Low er middle                    | 0.018            | \$40,479          | \$25,117  | 2.4             | 2,868    | 71.2          | \$568                          | \$353                     | \$864     |
| 48 | Iraq               | Low er middle                    | 0.009            | \$53,565          | \$25,989  | 1.9             | 2,587    | 55.8          | \$960                          | \$466                     | \$758     |
| 49 | Namibia            | Upper middle                     | 0.038            | \$75,606          | \$204,271 | 15.6            | 1,528    | 402.7         | \$188                          | \$507                     | \$606     |
| 50 | Cambodia           | Low                              | 0.014            | \$38,413          | \$31,172  | 1.9             | 1,341    | 54.3          | \$708                          | \$574                     | \$739     |
| 51 | Nepal              | Low                              | 0.010            | \$30,836          | \$28,994  | 1.4             | 1,135    | 39.8          | \$776                          | \$729                     | \$883     |
| 52 | Morocco            | Low er middle                    | 0.006            | \$58,387          | \$42,818  | 1.9             | 1,623    | 54.8          | \$1,066                        | \$782                     | \$650     |
| 53 | Bangladesh         | Low                              | 0.007            | \$35,658          | \$30,236  | 0.9             | 1,076    | 25.9          | \$1,377                        | \$1,168                   | \$1,046   |
| 54 | Algeria            | Upper middle                     | 0.008            | \$73,540          | \$51,390  | 1.4             | 1,304    | 41.0          | \$1,793                        | \$1,253                   | \$606     |
| 55 | Uzbekistan         | Low er middle                    | 0.006            | \$45,989          | \$25,637  | 0.6             | 2,352    | 18.2          | \$2,523                        | \$1,406                   | \$717     |
| 56 | Ukraine            | Low er middle                    | 0.006            | \$74,228          | \$68,364  | 1.2             | 623      | 33.6          | \$2,210                        | \$2,036                   | \$600     |
| 57 | Thailand           | Upper middle                     | 0.005            | \$90,759          | \$100,377 | 1.8             | 455      | 48.7          | \$1,863                        | \$2,061                   | \$622     |
| 58 | Indonesia          | Low er middle                    | 0.008            | \$56,321          | \$46,677  | 0.7             | 814      | 20.8          | \$2,708                        | \$2,244                   | \$793     |
| 59 | Bolivia            | Low er middle                    | 0.010            | \$56,321          | \$30,994  | 0.4             | 2,015    | 13.5          | \$4,178                        | \$2,299                   | \$668     |
| 60 | Vietnam            | Low er middle                    | 0.005            | \$45,989          | \$40,910  | 0.6             | 828      | 17.6          | \$2,616                        | \$2,327                   | \$664     |
| 61 | Colombia           | Upper middle                     | 0.003            | \$95,580          | \$63,657  | 0.6             | 1,419    | 20.5          | \$4,652                        | \$3,098                   | \$598     |
| 62 | Peru               | Upper middle                     | 0.004            | \$95,580          | \$59,439  | 0.6             | 1,497    | 19.0          | \$5,026                        | \$3,126                   | \$613     |
| 63 | Brazil             | Upper middle                     | 0.004            | \$104,534         | \$65,501  | 0.6             | 1,385    | 19.2          | \$5,431                        | \$3,403                   | \$581     |
| 64 | Philippines        | Low er middle                    | 0.003            | \$51,499          | \$39,031  | 0.3             | 1,289    | 10.9          | \$4,746                        | \$3,597                   | \$724     |
| 65 | Russian Federation | High: nonOECD                    | 0.007            | \$143,794         | \$121,954 | 1.1             | 735      | 31.2          | \$4,607                        | \$3,907                   | \$579     |
| 66 | Argentina          | Upper middle                     | 0.003            | \$147,238         | \$101,854 | 0.6             | 1,097    | 18.1          | \$8,155                        | \$5,642                   | \$577     |
| 67 | Malaysia           | Upper middle                     | 0.004            | \$138,284         | \$104,408 | 0.6             | 930      | 17.6          | \$7,858                        | \$5,933                   | \$591     |
| 68 | Turkey             | Upper middle                     | 0.001            | \$29,459          | \$58,058  | 0.1             | 1,784    | 6.1           | \$4,821                        | \$9,501                   | \$582     |
| 69 | Mexico             | Upper middle                     | 0.003            | \$127,264         | \$134,901 | 0.3             | 0        | 9.6           | \$13,197                       | \$13,989                  | \$583     |
| 70 | China              | Upper middle                     | 0.001            | \$84,560          | \$74,564  | 0.1             | 486      | 4.7           | \$18,015                       | \$15,886                  | \$638     |

**Table 4.** IPC costs, DALYs averted, and cost-effectiveness compared with no intervention, and incremental cost-effectiveness for 70 countries in increments of 10, ranked by cost-effectiveness. “Net costs” consist of IPC campaign costs adjusted for medical costs averted or added due to the campaign. Results assume 15% of population covered by IPC in each country. Costs in 2012 US\$.

| Countries      | Campaign cost    | Net cost         |                  | DALYs averted |            | Cost-effectiveness<br>(compared with no<br>intervention) |         | Incremental cost-<br>effectiveness<br>(compared with<br>previous row) |          |
|----------------|------------------|------------------|------------------|---------------|------------|----------------------------------------------------------|---------|-----------------------------------------------------------------------|----------|
|                |                  | Camp. 1          | Camp. 2          | Camp. 1       | Camp. 2    | Camp. 1                                                  | Camp. 2 | Camp. 1                                                               | Camp. 2  |
| <b>Top 10</b>  | \$583,177,366    | \$397,894,640    | \$468,463,768    | 8,047,765     | 5,708,048  | \$49                                                     | \$82    | n/a                                                                   | n/a      |
| <b>Top 20</b>  | \$2,387,027,516  | \$2,054,199,874  | \$2,067,515,989  | 27,062,539    | 16,290,756 | \$76                                                     | \$127   | \$87                                                                  | \$151    |
| <b>Top 30</b>  | \$3,714,990,510  | \$3,553,721,721  | \$3,338,446,785  | 39,613,366    | 23,819,194 | \$90                                                     | \$140   | \$119                                                                 | \$169    |
| <b>Top 40*</b> | \$5,614,207,760  | \$4,942,809,191  | \$4,858,446,157  | 47,308,985    | 29,163,714 | \$104                                                    | \$167   | \$181                                                                 | \$284    |
| <b>Top 50*</b> | \$16,236,860,722 | \$13,421,640,706 | \$13,946,462,307 | 72,652,651    | 49,829,348 | \$185                                                    | \$280   | \$335                                                                 | \$440    |
| <b>Top 60</b>  | \$22,258,435,675 | \$18,632,238,223 | \$19,414,467,973 | 75,731,913    | 51,855,152 | \$246                                                    | \$374   | \$1,692                                                               | \$2,699  |
| <b>Top 70</b>  | \$51,294,946,151 | \$43,498,730,679 | \$46,290,783,278 | 78,713,520    | 53,217,470 | \$553                                                    | \$870   | \$8,340                                                               | \$19,728 |

**Table 5.** Median cost-effectiveness (net cost per DALY averted) by 10-country increments in order of cost-effectiveness

| Countries ranked by<br>IPC cost-effectiveness | Campaign 1 | Campaign 2 | Antiretroviral<br>therapy for HIV |
|-----------------------------------------------|------------|------------|-----------------------------------|
| Top 10                                        | \$50       | \$102      | \$854                             |
| 11 - 20                                       | \$88       | \$141      | \$958                             |
| 21 - 30                                       | \$121      | \$197      | \$797                             |
| 31 - 40                                       | \$185      | \$318      | \$894                             |
| 41 - 50                                       | \$335      | \$591      | \$683                             |
| 51 - 60                                       | \$1,721    | \$3,514    | \$666                             |
| 60 - 70                                       | \$4,774    | \$17,068   | \$587                             |

For peer review only



**Table 6.** Multiway sensitivity analysis; 20,000- trial Monte Carlo simulation, 80% confidence Interval for three IPC outcomes and cost per DALY averted by ART for HIV for Kenya, Bangladesh and Nigeria.

| Outcome                                        | Kenya              | Bangladesh          | Nigeria           |
|------------------------------------------------|--------------------|---------------------|-------------------|
| DALYs averted                                  | 206 - 407          | 13.1 - 45.8         | 228 - 564         |
| Net Costs                                      | \$7,810 - \$79,885 | \$18,566 - \$41,473 | \$2,241- \$61,448 |
| Net cost per DALY averted (cost-effectiveness) | \$23 - \$304       | \$519 - \$2,547     | \$5 - \$208       |
| Cost per DALY averted by ART for HIV           | \$883              | \$1,046             | \$747             |

For peer review only

Figure 1. Cost-effectiveness (Net IPC cost per DALY averted) and Opportunity Index (DALYs per capita)\* (Campaign 1, n=70)

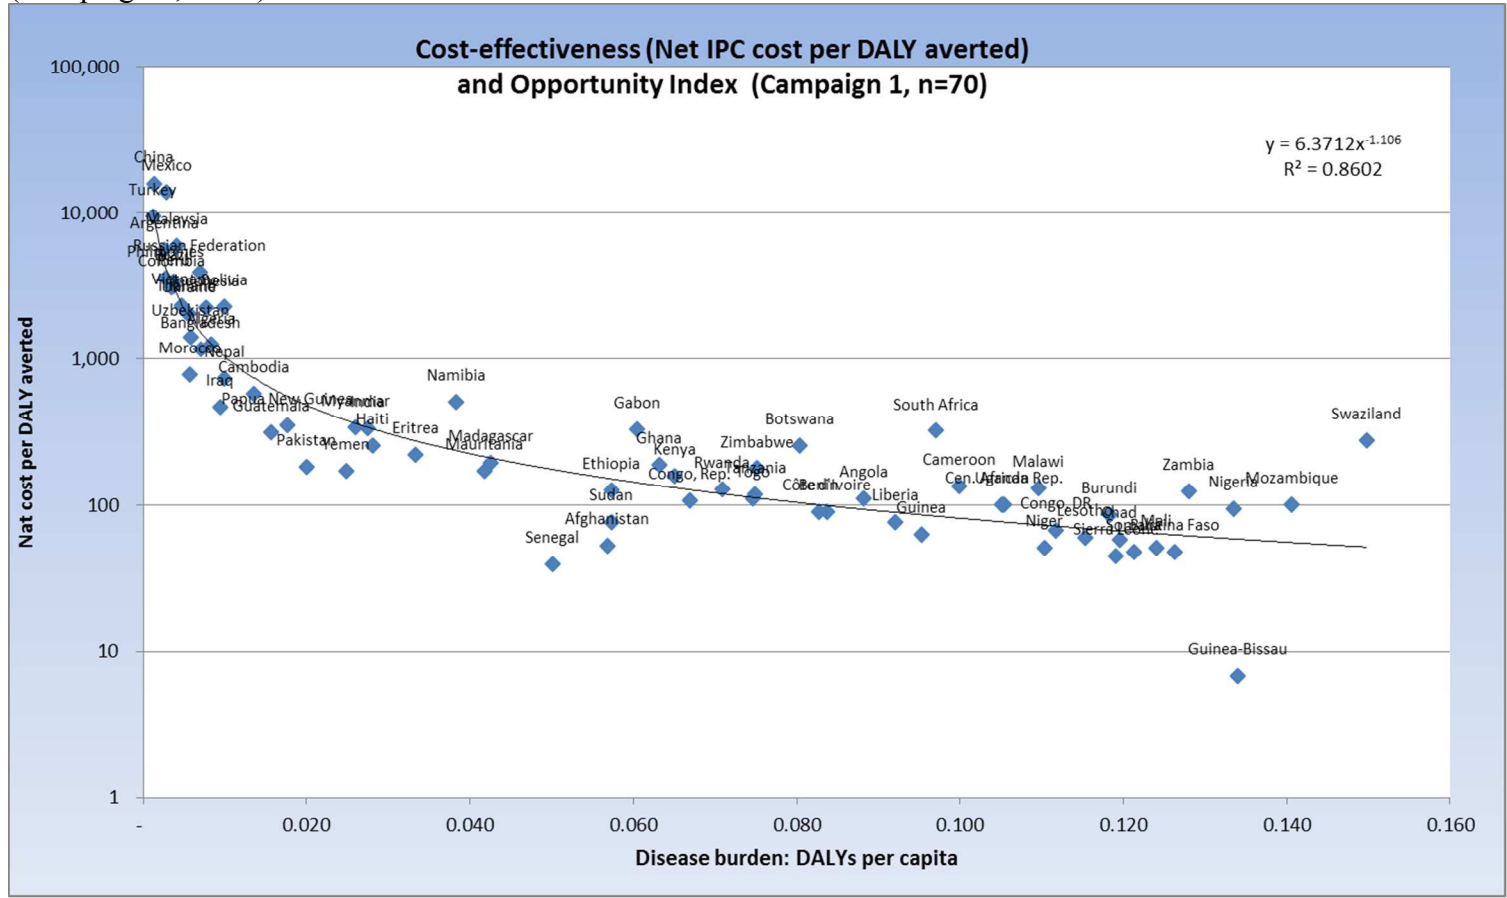

\*An “opportunity index” variable created to measure the DALYs per capita across the three diseases of the IPC for each country

Review only

Figure 2. Tornado Graph of Cost per DALY averted –Nigeria: Impact by Input

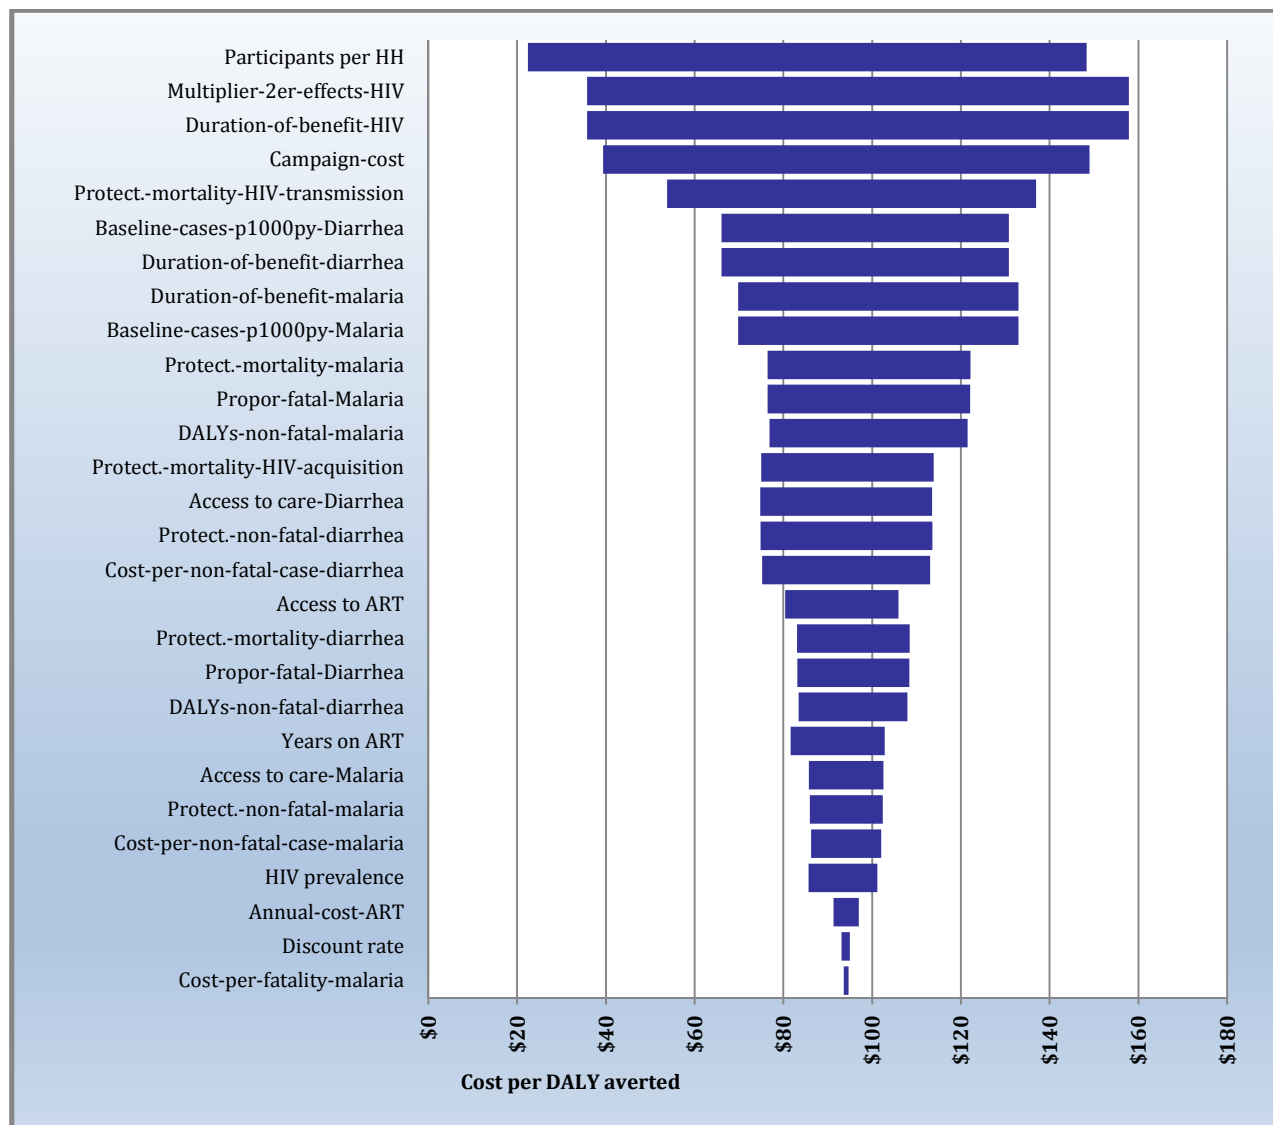

**Figure 3.** One-way sensitivity analysis of incremental cost-effectiveness by three key variables in 10-country increments ranked by IPC cost-effectiveness.

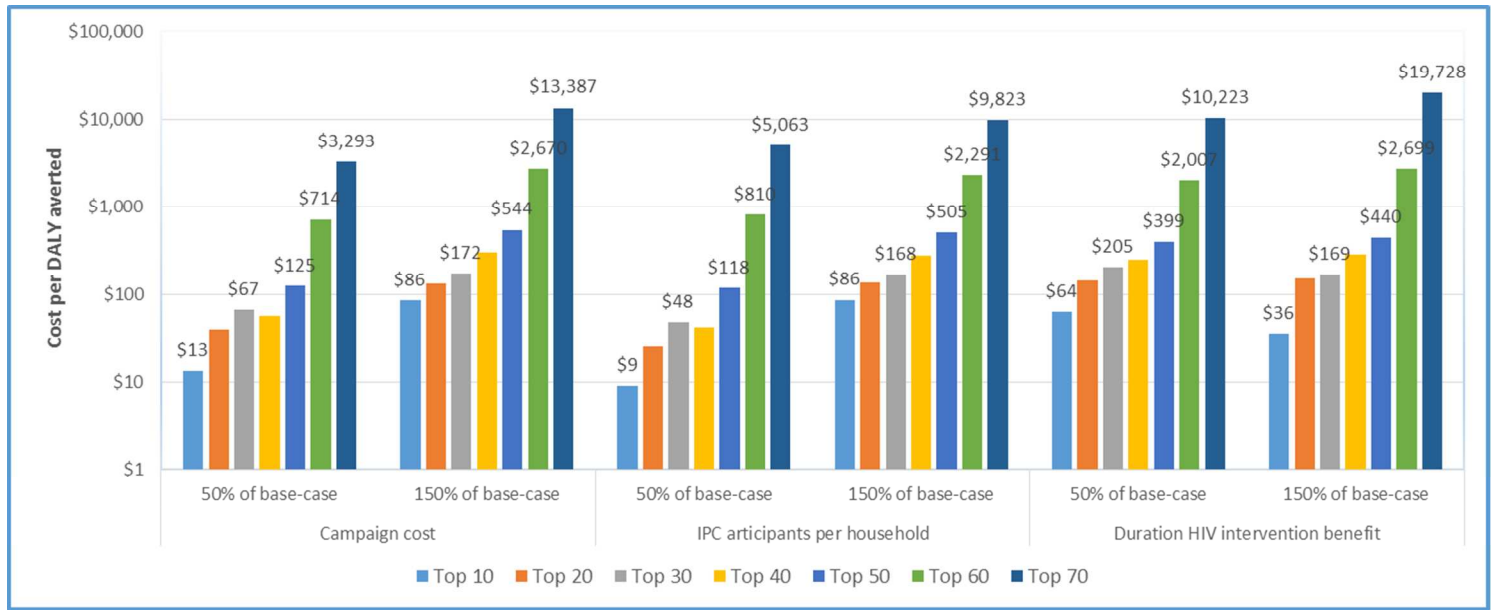

Peer review only

**Figure 4.** Result of 20,000-trial Monte Carlo simulation: Correlation between input values and cost per DALY averted – Nigeria.

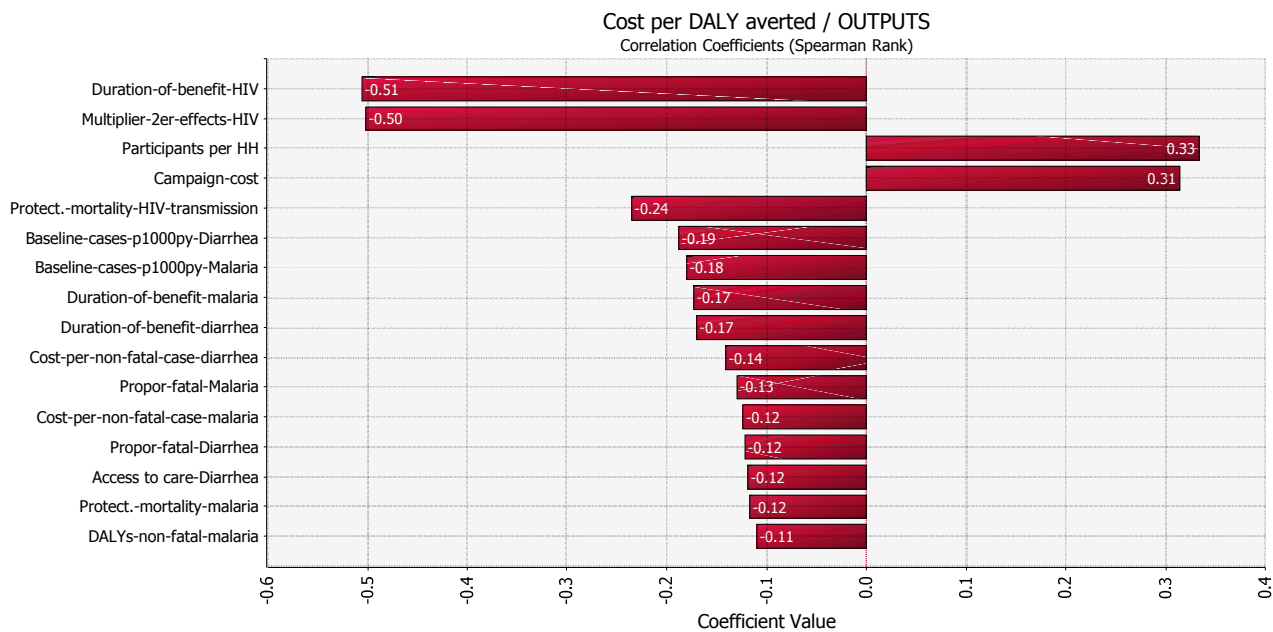

Peer review only

## Technical Supplement

### Reduction in risk for malaria and HIV between first and second campaign

In this analysis, to explore sustainability, we examine both an initial campaign and a follow-up campaign three years later. Thus, we need to estimate the health benefit realized by the follow-up campaign, taking into account the stability of disease reduction offered initially. The more that initial protection decays over six years, and thus the larger the disease risk in years 4-6, the greater will be the benefit of a campaign at three years. This decay is a function of the physical durability of the commodities distributed, as well as maintenance of safer behaviors. The dynamics vary by disease.

For malaria we assume 75% as much disease incidence at years 4-6 (absent a 2<sup>nd</sup> campaign) as baseline incidence. In other words, we assume that full set of LLIN distributed in the *initial* campaign, with no follow-up campaign, would have half as much community benefit in years 4-6 as in years 1-3. Many LLIN will remain in place, and the insecticide impregnation itself is stable for close to 10 years. Thus, the 50% incidence drop expected with LLIN in years 1-3 will decrease but not disappear in the second 3 years. However, the second round of LLIN are likely to have a relative effectiveness less than 50%, because the best LLIN users are already protected. Thus we decrease the effectiveness from 50% to 33% (i.e., from 75% of baseline incidence to 50% of baseline incidence). In effect, the 2<sup>nd</sup> campaign is like a booster shot that returns effectiveness to its original level. In sum, the overall benefit of the second campaign is reduced by half -- in first campaign it was 100% of baseline incidence to 50%, and in the second campaign from 75% of baseline incidence to 50%.

We note that these estimates are assembled from isolated data (e.g., LLIN physical durability) combined with a logical framework and best guesses. Nonetheless, we believe that the conclusion – 50% as much benefit for a second campaign – is plausible, and is a far more realistic assumption than full benefit. Our approach is conservative regarding the second campaign – if the specified durability of effect of the LLIN is larger than in reality, we would be *underestimating* the benefit of this campaign. And our estimate of the combined effect of two sequential campaigns is robust. Low estimates of durability understate benefits of the first campaign and overstate benefits of the second campaign, which represent offsetting errors. Conversely, high estimates of durability overstate the value of the first campaign and understate second campaign benefits, again offsetting.

For diarrhea, we assume no filter benefit after three years. The filters are expected to last in good function only three years. Thus, the filter component of the second campaign is just as effective as for the first campaign.

For HIV, effects on DALYs and cost depend heavily on undiagnosed HIV prevalence. The first campaign detects almost all HIV-infected individuals. Thus, the effects of the second campaign depend mainly on the impact of 3 years of HIV incidence on (predominantly undiagnosed) HIV prevalence. This incidence has not been measured, but can be estimated from HIV prevalence using simple epidemic dynamics. [1]Steady-state (pre-ART) annual incidence is about 1/10th of prevalence (slightly more if prevalence above 10%, due to reduction in # of susceptibles). So, if initial prevalence was 5%, then annual incidence is about 0.5%, and prevalence at 3 years will be about 1.5%.

Incidence and thus prevalence could be even lower if ART reduces community viral load and also if VCT for HIV+ has substantial behavioral benefits. They could be higher if the first campaign selectively missed HIV+, eg they chose not to participate or were away in urban areas.

### Diarrhea: estimation of average cases per PY and annual cases

Using data on the number of episodes per year in children under 5 [2], we estimated the average number of episodes (cases) per person-year in the overall population by weighting the incidence by the percentage of the population under five [3] and over five. We then adjusted the incidence in the >5 year-old population by the ratio

of the country <5 incidence to the average global <5 incidence [4]. Multiplying each estimate by the total population [5] provided estimates of the number of cases of diarrhea in each country.

**Explanation for difference between results reported in earlier analysis (Kahn, 2012) and current article.** The earlier evaluation of the Integrated Prevention Campaign in Western Province, Kenya found that the 2008 campaign saved \$16,015 and averted 442 DALYs per 1,000 campaign participants.[6] The current article finds a highly favorable cost-effectiveness ratio of \$157 per DALY averted (net cost of \$ 46,149 and 294 DALYs averted per 1,000 campaign participants), but no cost savings in the base-case analysis for Kenya. The difference can be attributed to the aggregate effect of changes in input parameter values of two types: (a) **Geographic shift from Western Province to Kenya in general.** The earlier analysis calculated the number of beneficiaries per household based on household size data from the campaign communities, 7.7 persons. In the current article, we used the lower national figure of 4.6, assumed to reflect fewer children per household [7]. The total benefits of the malaria and diarrheal disease interventions fell accordingly. The current article also uses lower figures for malaria and diarrheal annual incidence, 0.057 and 0.542 per individual for Kenya, respectively, versus 0.30 and 1.75 as found in the 2008 survey in Western Province. (b) **Refined data on care seeking.** The 2012 article assumed 100% care-seeking for diarrhea and malaria. Subsequently, we obtained data on care-seeking patterns, though not specific to Kenya. The current article thus assumes 67.8% for diarrheal diseases and 68.4% for malaria. In addition, we adjusted two cost inputs. The campaign cost was updated to include a recent water filter maintenance program to \$34,280 from \$32,000 in the earlier paper. Based on a more complete review of the relevant literature including new findings on life expectancy for people receiving antiretroviral therapy (ART), we also increased the estimated lifetime cost of ART, from \$5,092 to \$12,213.

**Tech. Suppl. - Table 1:** Summary costs and cost-effectiveness results per 1,000 IPC participants for 70 countries ordered from most to least cost-effective. The grey highlighted cells indicate cost-effectiveness ratios less favorable than investment in ART. Results shown are for the second and subsequent 3-year campaigns.

|    | Country            | World Bank income classification | DALYs per capita | Costs             |           | Disease averted |          | DALYs averted | Cost-effectiveness (CE)        |                           |           |
|----|--------------------|----------------------------------|------------------|-------------------|-----------|-----------------|----------|---------------|--------------------------------|---------------------------|-----------|
|    |                    |                                  |                  | IPC campaign cost | Net cost  | Deaths          | Episodes |               | Campaign cost per DALY averted | Net cost per DALY averted | CE of ART |
| 1  | Guinea-Bissau      | Low                              | 0.134            | \$29,459          | \$16,675  | 26.9            | 5,465.3  | 754.3         | \$22                           | \$39                      | \$1,005   |
| 2  | Somalia            | Low                              | 0.121            | \$26,015          | \$23,643  | 11.6            | 2,055.1  | 325.2         | \$73                           | \$80                      | \$768     |
| 3  | Afghanistan        | Low                              | 0.057            | \$28,770          | \$22,700  | 12.2            | 2,380.6  | 342.0         | \$66                           | \$84                      | \$764     |
| 4  | Congo, DR          | Low                              | 0.112            | \$24,637          | \$24,258  | 9.3             | 1,851.9  | 259.2         | \$94                           | \$95                      | \$819     |
| 5  | Niger              | Low                              | 0.110            | \$28,081          | \$24,250  | 10.0            | 2,648.0  | 282.6         | \$86                           | \$99                      | \$1,535   |
| 6  | Mali               | Low                              | 0.124            | \$29,459          | \$25,298  | 10.0            | 2,312.1  | 280.1         | \$90                           | \$105                     | \$1,095   |
| 7  | Burundi            | Low                              | 0.118            | \$26,015          | \$27,699  | 8.7             | 1,256.5  | 239.8         | \$116                          | \$108                     | \$888     |
| 8  | Sierra Leone       | Low                              | 0.119            | \$31,525          | \$24,508  | 9.8             | 2,142.5  | 274.1         | \$89                           | \$115                     | \$935     |
| 9  | Mozambique         | Low                              | 0.141            | \$30,147          | \$36,613  | 9.7             | 1,975.5  | 260.0         | \$141                          | \$116                     | \$807     |
| 10 | Burkina Faso       | Low                              | 0.126            | \$31,525          | \$26,076  | 9.6             | 2,153.3  | 270.2         | \$96                           | \$117                     | \$738     |
| 11 | Chad               | Low                              | 0.120            | \$35,658          | \$27,805  | 10.6            | 2,258.2  | 294.9         | \$94                           | \$121                     | \$928     |
| 12 | Lesotho            | Lower middle                     | 0.115            | \$35,658          | \$37,171  | 11.7            | 919.3    | 283.6         | \$131                          | \$126                     | \$1,493   |
| 13 | Malawi             | Low                              | 0.110            | \$28,081          | \$36,299  | 8.6             | 1,532.3  | 221.8         | \$164                          | \$127                     | \$703     |
| 14 | Zambia             | Lower middle                     | 0.128            | \$33,591          | \$41,222  | 10.1            | 1,660.1  | 263.4         | \$156                          | \$128                     | \$1,025   |
| 15 | Liberia            | Low                              | 0.092            | \$26,704          | \$25,199  | 6.8             | 1,762.6  | 190.4         | \$132                          | \$140                     | \$987     |
| 16 | Guinea             | Low                              | 0.095            | \$29,459          | \$25,199  | 7.4             | 2,175.8  | 208.8         | \$121                          | \$141                     | \$910     |
| 17 | Ken. African Rep.  | Low                              | 0.105            | \$27,392          | \$29,606  | 7.1             | 1,443.6  | 194.2         | \$152                          | \$141                     | \$801     |
| 18 | Uganda             | Low                              | 0.105            | \$31,525          | \$31,104  | 7.9             | 1,841.7  | 214.8         | \$145                          | \$147                     | \$747     |
| 19 | Zimbabwe           | Low                              | 0.075            | \$25,326          | \$40,453  | 6.9             | 905.4    | 165.8         | \$244                          | \$153                     | \$1,109   |
| 20 | Côte d'Ivoire      | Lower middle                     | 0.084            | \$33,591          | \$31,110  | 7.8             | 2,009.7  | 214.9         | \$145                          | \$156                     | \$1,230   |
| 21 | Ethiopia           | Low                              | 0.057            | \$30,147          | \$28,881  | 6.5             | 1,128.0  | 181.8         | \$159                          | \$166                     | \$749     |
| 22 | Cameroon           | Lower middle                     | 0.100            | \$37,724          | \$39,507  | 8.1             | 1,620.0  | 223.1         | \$177                          | \$169                     | \$756     |
| 23 | Senegal            | Lower middle                     | 0.050            | \$34,969          | \$22,535  | 6.8             | 2,951.7  | 193.6         | \$116                          | \$181                     | \$864     |
| 24 | Togo               | Low                              | 0.075            | \$29,459          | \$28,877  | 5.5             | 1,466.8  | 153.3         | \$188                          | \$192                     | \$674     |
| 25 | Rwanda             | Low                              | 0.071            | \$31,525          | \$30,620  | 5.9             | 1,248.9  | 163.9         | \$187                          | \$192                     | \$935     |
| 26 | Tanzania           | Low                              | 0.075            | \$33,591          | \$32,273  | 6.1             | 1,636.6  | 167.4         | \$193                          | \$201                     | \$826     |
| 27 | Benin              | Low                              | 0.083            | \$33,591          | \$28,793  | 5.9             | 1,611.1  | 167.1         | \$172                          | \$201                     | \$1,139   |
| 28 | Swaziland          | Lower middle                     | 0.150            | \$58,387          | \$87,699  | 11.5            | 1,280.6  | 281.0         | \$312                          | \$208                     | \$768     |
| 29 | Nigeria            | Lower middle                     | 0.133            | \$40,479          | \$34,860  | 6.7             | 1,610.1  | 187.0         | \$186                          | \$217                     | \$996     |
| 30 | Kenya              | Low                              | 0.065            | \$34,280          | \$35,682  | 5.2             | 1,130.6  | 142.8         | \$250                          | \$240                     | \$741     |
| 31 | Gabon              | Upper middle                     | 0.060            | \$29,826          | \$46,367  | 4.0             | 972.5    | 110.7         | \$419                          | \$269                     | \$883     |
| 32 | Congo, Rep.        | Lower middle                     | 0.067            | \$54,254          | \$42,228  | 7.2             | 1,522.2  | 199.0         | \$212                          | \$273                     | \$955     |
| 33 | Angola             | Upper middle                     | 0.088            | \$64,586          | \$44,239  | 8.5             | 1,758.3  | 236.6         | \$187                          | \$273                     | \$719     |
| 34 | Sudan              | Lower middle                     | 0.057            | \$38,413          | \$24,940  | 4.8             | 2,620.5  | 136.6         | \$183                          | \$281                     | \$1,731   |
| 35 | Mauritania         | Lower middle                     | 0.042            | \$36,346          | \$31,642  | 4.4             | 1,397.4  | 123.1         | \$257                          | \$295                     | \$904     |
| 36 | Madagascar         | Low                              | 0.043            | \$28,770          | \$26,424  | 3.0             | 1,079.4  | 84.6          | \$312                          | \$340                     | \$746     |
| 37 | Eritrea            | Low                              | 0.033            | \$27,392          | \$26,191  | 2.8             | 1,117.1  | 78.5          | \$334                          | \$349                     | \$1,025   |
| 38 | Yemen              | Lower middle                     | 0.025            | \$37,035          | \$27,682  | 3.5             | 1,778.2  | 99.3          | \$279                          | \$373                     | \$1,753   |
| 39 | Ghana              | Lower middle                     | 0.063            | \$44,612          | \$38,058  | 4.2             | 1,006.4  | 117.8         | \$323                          | \$379                     | \$577     |
| 40 | Haiti              | Low                              | 0.028            | \$30,836          | \$29,010  | 2.8             | 1,789.6  | 80.4          | \$361                          | \$384                     | \$869     |
| 41 | Pakistan           | Lower middle                     | 0.020            | \$41,856          | \$28,870  | 3.6             | 1,574.8  | 102.7         | \$281                          | \$407                     | \$632     |
| 42 | South Africa       | Upper middle                     | 0.097            | \$99,713          | \$115,007 | 9.1             | 659.2    | 235.9         | \$487                          | \$423                     | \$627     |
| 43 | Namibia            | Upper middle                     | 0.038            | \$75,606          | \$106,711 | 5.9             | 855.9    | 150.8         | \$708                          | \$502                     | \$582     |
| 44 | India              | Lower middle                     | 0.027            | \$48,744          | \$40,648  | 3.4             | 713.2    | 96.2          | \$422                          | \$506                     | \$613     |
| 45 | Botswana           | Upper middle                     | 0.080            | \$137,595         | \$139,112 | 9.9             | 634.1    | 262.4         | \$530                          | \$524                     | \$733     |
| 46 | Myanmar            | Low                              | 0.026            | \$31,525          | \$29,473  | 1.7             | 672.6    | 48.0          | \$614                          | \$657                     | \$1,354   |
| 47 | Camodia            | Low                              | 0.014            | \$38,413          | \$33,905  | 1.3             | 758.8    | 37.6          | \$901                          | \$1,020                   | \$864     |
| 48 | Nepal              | Low                              | 0.010            | \$30,836          | \$29,442  | 1.1             | 654.7    | 30.0          | \$982                          | \$1,028                   | \$758     |
| 49 | Iraq               | Upper middle                     | 0.009            | \$53,565          | \$37,274  | 1.7             | 1,493.0  | 50.4          | \$740                          | \$1,063                   | \$606     |
| 50 | Guatemala          | Lower middle                     | 0.016            | \$57,698          | \$35,999  | 1.8             | 1,812.5  | 51.6          | \$698                          | \$1,118                   | \$739     |
| 51 | Papua New Guinea   | Lower middle                     | 0.018            | \$40,479          | \$31,703  | 1.2             | 1,488.7  | 35.8          | \$885                          | \$1,130                   | \$883     |
| 52 | Bangladesh         | Low                              | 0.007            | \$35,658          | \$32,480  | 0.8             | 617.4    | 23.0          | \$1,413                        | \$1,551                   | \$650     |
| 53 | Morocco            | Lower middle                     | 0.006            | \$58,387          | \$49,883  | 1.1             | 898.4    | 31.6          | \$1,577                        | \$1,846                   | \$1,046   |
| 54 | Algeria            | Upper middle                     | 0.008            | \$73,540          | \$60,354  | 1.3             | 752.8    | 38.2          | \$1,580                        | \$1,925                   | \$606     |
| 55 | Uzbekistan         | Lower middle                     | 0.006            | \$45,989          | \$34,086  | 0.5             | 1,357.2  | 14.9          | \$2,282                        | \$3,079                   | \$717     |
| 56 | Indonesia          | Lower middle                     | 0.008            | \$56,321          | \$50,560  | 0.5             | 463.2    | 14.3          | \$3,545                        | \$3,949                   | \$600     |
| 57 | Thailand           | Upper middle                     | 0.005            | \$90,759          | \$90,800  | 0.8             | 261.3    | 21.7          | \$4,177                        | \$4,175                   | \$622     |
| 58 | Vietnam            | Lower middle                     | 0.005            | \$45,989          | \$42,516  | 0.3             | 477.7    | 8.2           | \$5,164                        | \$5,586                   | \$793     |
| 59 | Philippines        | Lower middle                     | 0.003            | \$51,499          | \$44,213  | 0.3             | 743.4    | 8.8           | \$5,026                        | \$5,854                   | \$668     |
| 60 | Ukraine            | Lower middle                     | 0.006            | \$74,228          | \$69,343  | 0.4             | 359.1    | 11.5          | \$6,052                        | \$6,479                   | \$664     |
| 61 | Bolivia            | Lower middle                     | 0.010            | \$56,321          | \$41,435  | 0.2             | 1,162.3  | 8.2           | \$5,044                        | \$6,856                   | \$598     |
| 62 | Peru               | Upper middle                     | 0.004            | \$95,580          | \$73,664  | 0.3             | 862.2    | 9.6           | \$7,650                        | \$9,926                   | \$613     |
| 63 | Colombia           | Upper middle                     | 0.003            | \$95,580          | \$75,850  | 0.3             | 817.2    | 8.8           | \$8,575                        | \$10,806                  | \$581     |
| 64 | Brazil             | Upper middle                     | 0.004            | \$104,534         | \$81,187  | 0.3             | 798.2    | 9.0           | \$9,029                        | \$11,626                  | \$724     |
| 65 | Russian Federation | High: nonOECD                    | 0.007            | \$143,794         | \$128,452 | 0.4             | 424.3    | 10.8          | \$11,898                       | \$13,319                  | \$579     |
| 66 | Malaysia           | Upper middle                     | 0.004            | \$138,284         | \$117,395 | 0.2             | 536.0    | 6.6           | \$17,673                       | \$20,818                  | \$577     |
| 67 | Argentina          | Upper middle                     | 0.003            | \$147,238         | \$119,687 | 0.2             | 632.8    | 6.8           | \$17,487                       | \$21,512                  | \$591     |
| 68 | Turkey             | Upper middle                     | 0.001            | \$125,197         | \$86,272  | 0.1             | 1,029.3  | 3.9           | \$22,267                       | \$32,314                  | \$582     |
| 69 | China              | Upper middle                     | 0.001            | \$84,560          | \$78,518  | 0.1             | 280.4    | 2.3           | \$33,785                       | \$36,384                  | \$583     |
| 70 | Mexico             | Upper middle                     | 0.003            | \$127,264         | \$129,804 | 0.1             | 0.1      | 3.2           | \$40,371                       | \$39,581                  | \$638     |



**Tech. Suppl. - Table 2.** Summary costs and cost-effectiveness results per 1,000 IPC participants for 70 countries ordered from highest to lowest opportunity index score reflecting per-capita HIV, TB and malaria disease burden. Grey cells indicate cost-effectiveness ratios less favorable than investment in ART. Results shown are for the first 3-year campaign.

|    | Country            | World Bank income classification | DALYs per capita | Costs             |           | Disease averted |          | DALYs averted | Cost-effectiveness (CE)        |                           |           |
|----|--------------------|----------------------------------|------------------|-------------------|-----------|-----------------|----------|---------------|--------------------------------|---------------------------|-----------|
|    |                    |                                  |                  | IPC campaign cost | Net cost  | Deaths          | Episodes |               | Campaign cost per DALY averted | Net cost per DALY averted | CE of ART |
| 1  | Swaziland          | Low er middle                    | 0.150            | \$58,387          | \$198,392 | 29.1            | 2,230    | 724.2         | \$81                           | \$274                     | \$632     |
| 2  | Mozambique         | Low                              | 0.141            | \$30,147          | \$59,145  | 22.2            | 3,816    | 590.0         | \$51                           | \$100                     | \$1,109   |
| 3  | Guinea-Bissau      | Low                              | 0.134            | \$29,459          | \$7,814   | 40.7            | 10,523   | 1143.3        | \$26                           | \$7                       | \$1,005   |
| 4  | Nigeria            | Low er middle                    | 0.133            | \$40,479          | \$34,769  | 13.4            | 3,102    | 369.3         | \$110                          | \$94                      | \$747     |
| 5  | Zambia             | Low er middle                    | 0.128            | \$33,591          | \$69,806  | 21.8            | 3,107    | 564.3         | \$60                           | \$124                     | \$826     |
| 6  | Burkina Faso       | Low                              | 0.126            | \$31,525          | \$22,206  | 16.4            | 4,124    | 459.4         | \$69                           | \$48                      | \$819     |
| 7  | Mali               | Low                              | 0.124            | \$29,459          | \$23,016  | 15.9            | 4,222    | 445.8         | \$66                           | \$52                      | \$888     |
| 8  | Somalia            | Low                              | 0.121            | \$26,015          | \$22,754  | 16.8            | 3,682    | 470.5         | \$55                           | \$48                      | \$1,535   |
| 9  | Chad               | Low                              | 0.120            | \$35,658          | \$24,848  | 15.3            | 4,335    | 424.6         | \$84                           | \$59                      | \$807     |
| 10 | Sierra Leone       | Low                              | 0.119            | \$31,525          | \$20,112  | 16.0            | 4,118    | 446.7         | \$71                           | \$45                      | \$764     |
| 11 | Burundi            | Low                              | 0.118            | \$26,015          | \$33,639  | 14.3            | 2,267    | 389.9         | \$67                           | \$96                      | \$987     |
| 12 | Lesotho            | Low er middle                    | 0.115            | \$35,658          | \$47,366  | 31.3            | 1,756    | 779.4         | \$46                           | \$61                      | \$738     |
| 13 | Congo, DR          | Low                              | 0.112            | \$24,637          | \$25,488  | 13.4            | 3,517    | 375.9         | \$66                           | \$68                      | \$1,493   |
| 14 | Niger              | Low                              | 0.110            | \$28,081          | \$21,620  | 14.8            | 4,967    | 419.7         | \$67                           | \$52                      | \$1,095   |
| 15 | Malawi             | Low                              | 0.110            | \$28,081          | \$59,745  | 18.3            | 2,965    | 462.2         | \$61                           | \$129                     | \$996     |
| 16 | Gen. African Rep.  | Low                              | 0.105            | \$27,392          | \$37,525  | 13.8            | 2,819    | 373.3         | \$73                           | \$101                     | \$1,230   |
| 17 | Uganda             | Low                              | 0.105            | \$31,525          | \$40,192  | 14.9            | 3,492    | 399.8         | \$79                           | \$101                     | \$749     |
| 18 | Cameroun           | Low er middle                    | 0.100            | \$37,724          | \$52,388  | 14.3            | 3,115    | 388.4         | \$97                           | \$135                     | \$741     |
| 19 | South Africa       | Upper middle                     | 0.097            | \$99,713          | \$180,284 | 21.5            | 1,150    | 561.0         | \$178                          | \$321                     | \$582     |
| 20 | Guinea             | Low                              | 0.095            | \$29,459          | \$22,324  | 12.6            | 4,272    | 353.8         | \$83                           | \$63                      | \$928     |
| 21 | Liberia            | Low                              | 0.092            | \$26,704          | \$25,526  | 11.9            | 3,401    | 332.6         | \$80                           | \$77                      | \$1,025   |
| 22 | Angola             | Upper middle                     | 0.088            | \$64,586          | \$35,794  | 11.5            | 3,268    | 320.8         | \$201                          | \$112                     | \$674     |
| 23 | Côte d'Ivoire      | Low er middle                    | 0.084            | \$33,591          | \$35,069  | 14.1            | 4,021    | 387.2         | \$87                           | \$91                      | \$801     |
| 24 | Benin              | Low                              | 0.083            | \$33,591          | \$25,345  | 10.0            | 3,096    | 280.0         | \$120                          | \$91                      | \$910     |
| 25 | Botswana           | Upper middle                     | 0.080            | \$137,595         | \$185,872 | 26.8            | 1,111    | 734.1         | \$187                          | \$253                     | \$577     |
| 26 | Zimbabwe           | Low                              | 0.075            | \$25,326          | \$76,203  | 17.8            | 1,682    | 428.8         | \$59                           | \$178                     | \$1,731   |
| 27 | Tanzania           | Low                              | 0.075            | \$33,591          | \$38,453  | 12.1            | 3,122    | 326.9         | \$103                          | \$118                     | \$935     |
| 28 | Togo               | Low                              | 0.075            | \$29,459          | \$32,147  | 10.4            | 2,849    | 288.7         | \$102                          | \$111                     | \$864     |
| 29 | Rwanda             | Low                              | 0.071            | \$31,525          | \$34,034  | 9.6             | 2,216    | 266.1         | \$118                          | \$128                     | \$768     |
| 30 | Congo, Rep.        | Low er middle                    | 0.067            | \$54,254          | \$33,944  | 11.5            | 2,981    | 318.5         | \$170                          | \$107                     | \$756     |
| 31 | Kenya              | Low                              | 0.065            | \$34,280          | \$46,149  | 10.9            | 2,018    | 294.1         | \$117                          | \$157                     | \$883     |
| 32 | Ghana              | Low er middle                    | 0.063            | \$44,612          | \$35,624  | 6.8             | 1,966    | 189.9         | \$235                          | \$188                     | \$746     |
| 33 | Gabon              | Upper middle                     | 0.060            | \$29,826          | \$84,306  | 9.3             | 1,876    | 255.0         | \$117                          | \$331                     | \$613     |
| 34 | Ethiopia           | Low                              | 0.057            | \$30,147          | \$29,630  | 8.6             | 1,986    | 235.7         | \$128                          | \$126                     | \$1,139   |
| 35 | Sudan              | Low er middle                    | 0.057            | \$38,413          | \$15,241  | 6.9             | 4,907    | 198.8         | \$193                          | \$77                      | \$703     |
| 36 | Afghanistan        | Low                              | 0.057            | \$28,770          | \$18,906  | 12.7            | 4,146    | 356.6         | \$81                           | \$53                      | \$935     |
| 37 | Senegal            | Low er middle                    | 0.050            | \$34,969          | \$12,190  | 10.7            | 5,735    | 306.0         | \$114                          | \$40                      | \$768     |
| 38 | Madagascar         | Low                              | 0.043            | \$28,770          | \$24,895  | 4.5             | 1,910    | 127.8         | \$225                          | \$195                     | \$1,025   |
| 39 | Mauritania         | Low er middle                    | 0.042            | \$36,346          | \$28,117  | 5.8             | 2,607    | 164.2         | \$221                          | \$171                     | \$955     |
| 40 | Namibia            | Upper middle                     | 0.038            | \$75,606          | \$204,271 | 15.6            | 1,528    | 402.7         | \$188                          | \$507                     | \$606     |
| 41 | Eritrea            | Low                              | 0.033            | \$27,392          | \$26,438  | 4.3             | 1,942    | 120.5         | \$227                          | \$219                     | \$1,753   |
| 42 | Haiti              | Low                              | 0.028            | \$30,836          | \$31,570  | 4.4             | 3,128    | 123.0         | \$251                          | \$257                     | \$869     |
| 43 | India              | Low er middle                    | 0.027            | \$48,744          | \$34,973  | 3.7             | 1,255    | 104.9         | \$464                          | \$333                     | \$733     |
| 44 | Myanmar            | Low                              | 0.026            | \$31,525          | \$28,249  | 2.9             | 1,306    | 83.7          | \$377                          | \$337                     | \$1,354   |
| 45 | Yemen              | Low er middle                    | 0.025            | \$37,035          | \$21,139  | 4.3             | 3,128    | 122.9         | \$301                          | \$172                     | \$719     |
| 46 | Pakistan           | Low er middle                    | 0.020            | \$41,856          | \$19,714  | 3.8             | 2,748    | 108.1         | \$387                          | \$182                     | \$904     |
| 47 | Papua New Guinea   | Low er middle                    | 0.018            | \$40,479          | \$25,117  | 2.4             | 2,888    | 71.2          | \$568                          | \$353                     | \$864     |
| 48 | Guatemala          | Low er middle                    | 0.016            | \$57,698          | \$22,134  | 2.4             | 3,143    | 70.1          | \$823                          | \$316                     | \$627     |
| 49 | Cambodia           | Low                              | 0.014            | \$38,413          | \$31,172  | 1.9             | 1,341    | 54.3          | \$708                          | \$574                     | \$739     |
| 50 | Nepal              | Low                              | 0.010            | \$30,836          | \$28,994  | 1.4             | 1,135    | 39.8          | \$776                          | \$729                     | \$883     |
| 51 | Bolivia            | Low er middle                    | 0.010            | \$56,321          | \$30,994  | 0.4             | 2,015    | 13.5          | \$4,178                        | \$2,299                   | \$668     |
| 52 | Iraq               | Upper middle                     | 0.009            | \$53,565          | \$25,989  | 1.9             | 2,587    | 55.8          | \$960                          | \$466                     | \$758     |
| 53 | Algeria            | Upper middle                     | 0.008            | \$73,540          | \$51,390  | 1.4             | 1,304    | 41.0          | \$1,793                        | \$1,253                   | \$606     |
| 54 | Indonesia          | Low er middle                    | 0.008            | \$56,321          | \$46,677  | 0.7             | 814      | 20.8          | \$2,708                        | \$2,244                   | \$793     |
| 55 | Bangladesh         | Low                              | 0.007            | \$35,658          | \$30,236  | 0.9             | 1,076    | 25.9          | \$1,377                        | \$1,168                   | \$1,046   |
| 56 | Russian Federation | High; nonOECD                    | 0.007            | \$143,794         | \$121,954 | 1.1             | 735      | 31.2          | \$4,607                        | \$3,907                   | \$579     |
| 57 | Uzbekistan         | Low er middle                    | 0.006            | \$45,989          | \$25,637  | 0.6             | 2,352    | 18.2          | \$2,523                        | \$1,406                   | \$717     |
| 58 | Morocco            | Low er middle                    | 0.006            | \$58,387          | \$42,818  | 1.9             | 1,623    | 54.8          | \$1,066                        | \$782                     | \$650     |
| 59 | Ukraine            | Low er middle                    | 0.006            | \$74,228          | \$68,364  | 1.2             | 623      | 33.6          | \$2,210                        | \$2,036                   | \$600     |
| 60 | Thailand           | Upper middle                     | 0.005            | \$90,759          | \$100,377 | 1.8             | 455      | 48.7          | \$1,863                        | \$2,061                   | \$622     |
| 61 | Vietnam            | Low er middle                    | 0.005            | \$45,989          | \$40,910  | 0.6             | 828      | 17.6          | \$2,616                        | \$2,327                   | \$664     |
| 62 | Malaysia           | Upper middle                     | 0.004            | \$138,284         | \$104,408 | 0.6             | 930      | 17.6          | \$7,858                        | \$5,933                   | \$591     |
| 63 | Brazil             | Upper middle                     | 0.004            | \$104,534         | \$65,501  | 0.6             | 1,385    | 19.2          | \$5,431                        | \$3,403                   | \$581     |
| 64 | Peru               | Upper middle                     | 0.004            | \$95,580          | \$59,439  | 0.6             | 1,497    | 19.0          | \$5,026                        | \$3,126                   | \$613     |
| 65 | Colombia           | Upper middle                     | 0.003            | \$95,580          | \$63,657  | 0.6             | 1,419    | 20.5          | \$4,652                        | \$3,098                   | \$598     |
| 66 | Mexico             | Upper middle                     | 0.003            | \$127,264         | \$134,901 | 0.3             | 0        | 9.6           | \$13,197                       | \$13,989                  | \$583     |
| 67 | Philippines        | Low er middle                    | 0.003            | \$51,499          | \$39,031  | 0.3             | 1,289    | 10.9          | \$4,746                        | \$3,597                   | \$724     |
| 68 | Argentina          | Upper middle                     | 0.003            | \$147,238         | \$101,854 | 0.6             | 1,097    | 18.1          | \$8,155                        | \$5,642                   | \$577     |
| 69 | China              | Upper middle                     | 0.001            | \$84,560          | \$74,564  | 0.1             | 486      | 4.7           | \$18,015                       | \$15,886                  | \$638     |
| 70 | Turkey             | Upper middle                     | 0.001            | \$125,197         | \$58,058  | 0.1             | 1,784    | 6.1           | \$20,489                       | \$9,501                   | \$582     |

**Tech. Suppl. - Table 3.** Summary costs and cost-effectiveness results per 1,000 IPC participants for 70 countries ordered from highest to lowest opportunity index score reflecting per-capita HIV, TB and malaria disease burden. Grey highlighted cells indicate cost-effectiveness ratios less favorable than investment in ART Results shown are for the second and subsequent 3-year campaigns.

| Country               | World Bank income classification | DALYs per capita | Costs             |           | Disease averted |          | DALYs averted | Cost-effectiveness (CE)        |                           |           |
|-----------------------|----------------------------------|------------------|-------------------|-----------|-----------------|----------|---------------|--------------------------------|---------------------------|-----------|
|                       |                                  |                  | IPC campaign cost | Net cost  | Deaths          | Episodes |               | Campaign cost per DALY averted | Net cost per DALY averted | CE of ART |
| 1 Swaziland           | Lower middle                     | 0.150            | \$58,387          | \$87,699  | 11.5            | 1,281    | 281.0         | \$312                          | \$208                     | \$632     |
| 2 Mozambique          | Low                              | 0.141            | \$30,147          | \$36,613  | 9.7             | 1,976    | 260.0         | \$141                          | \$116                     | \$1,109   |
| 3 Guinea-Bissau       | Low                              | 0.134            | \$29,459          | \$16,675  | 26.9            | 5,465    | 754.3         | \$22                           | \$39                      | \$1,005   |
| 4 Nigeria             | Lower middle                     | 0.133            | \$40,479          | \$34,860  | 6.7             | 1,610    | 187.0         | \$186                          | \$217                     | \$747     |
| 5 Zambia              | Lower middle                     | 0.128            | \$33,591          | \$41,222  | 10.1            | 1,660    | 263.4         | \$156                          | \$128                     | \$826     |
| 6 Burkina Faso        | Low                              | 0.126            | \$31,525          | \$26,076  | 9.6             | 2,153    | 270.2         | \$96                           | \$117                     | \$819     |
| 7 Mali                | Low                              | 0.124            | \$29,459          | \$25,298  | 10.0            | 2,312    | 280.1         | \$90                           | \$105                     | \$888     |
| 8 Somalia             | Low                              | 0.121            | \$26,015          | \$23,643  | 11.6            | 2,055    | 325.2         | \$73                           | \$80                      | \$1,535   |
| 9 Chad                | Low                              | 0.120            | \$35,658          | \$27,805  | 10.6            | 2,258    | 294.9         | \$94                           | \$121                     | \$807     |
| 10 Sierra Leone       | Low                              | 0.119            | \$31,525          | \$24,508  | 9.8             | 2,143    | 274.1         | \$89                           | \$115                     | \$764     |
| 11 Burundi            | Low                              | 0.118            | \$26,015          | \$27,699  | 8.7             | 1,256    | 239.8         | \$116                          | \$108                     | \$987     |
| 12 Lesotho            | Lower middle                     | 0.115            | \$35,658          | \$37,171  | 11.7            | 919      | 283.6         | \$131                          | \$126                     | \$738     |
| 13 Congo, DR          | Low                              | 0.112            | \$24,637          | \$24,258  | 9.3             | 1,852    | 259.2         | \$94                           | \$95                      | \$1,493   |
| 14 Niger              | Low                              | 0.110            | \$28,081          | \$24,250  | 10.0            | 2,648    | 282.6         | \$86                           | \$99                      | \$1,095   |
| 15 Malawi             | Low                              | 0.110            | \$28,081          | \$36,299  | 8.6             | 1,532    | 221.8         | \$164                          | \$127                     | \$996     |
| 16 Cen. African Rep.  | Low                              | 0.105            | \$27,392          | \$29,606  | 7.1             | 1,444    | 194.2         | \$152                          | \$141                     | \$1,230   |
| 17 Uganda             | Low                              | 0.105            | \$31,525          | \$31,104  | 7.9             | 1,842    | 214.8         | \$145                          | \$147                     | \$749     |
| 18 Cameroon           | Lower middle                     | 0.100            | \$37,724          | \$39,507  | 8.1             | 1,620    | 223.1         | \$177                          | \$169                     | \$741     |
| 19 South Africa       | Upper middle                     | 0.097            | \$99,713          | \$115,007 | 9.1             | 659      | 235.9         | \$487                          | \$423                     | \$582     |
| 20 Guinea             | Low                              | 0.095            | \$29,459          | \$25,199  | 7.4             | 2,176    | 208.8         | \$121                          | \$141                     | \$928     |
| 21 Liberia            | Low                              | 0.092            | \$26,704          | \$25,199  | 6.8             | 1,763    | 190.4         | \$132                          | \$140                     | \$1,025   |
| 22 Angola             | Upper middle                     | 0.088            | \$64,586          | \$44,239  | 8.5             | 1,758    | 236.6         | \$187                          | \$273                     | \$674     |
| 23 Côte d'Ivoire      | Lower middle                     | 0.084            | \$33,591          | \$31,110  | 7.8             | 2,010    | 214.9         | \$145                          | \$156                     | \$801     |
| 24 Benin              | Low                              | 0.083            | \$33,591          | \$28,793  | 5.9             | 1,611    | 167.1         | \$172                          | \$201                     | \$910     |
| 25 Botswana           | Upper middle                     | 0.080            | \$137,595         | \$139,112 | 9.9             | 634      | 262.4         | \$530                          | \$524                     | \$577     |
| 26 Zimbabwe           | Low                              | 0.075            | \$25,326          | \$40,453  | 6.9             | 905      | 165.8         | \$244                          | \$153                     | \$1,731   |
| 27 Tanzania           | Low                              | 0.075            | \$33,591          | \$32,273  | 6.1             | 1,637    | 167.4         | \$193                          | \$201                     | \$935     |
| 28 Togo               | Low                              | 0.075            | \$29,459          | \$28,877  | 5.5             | 1,467    | 153.3         | \$188                          | \$192                     | \$864     |
| 29 Rwanda             | Low                              | 0.071            | \$31,525          | \$30,620  | 5.9             | 1,249    | 163.9         | \$187                          | \$192                     | \$768     |
| 30 Congo, Rep.        | Lower middle                     | 0.067            | \$54,254          | \$42,228  | 7.2             | 1,522    | 199.0         | \$212                          | \$273                     | \$756     |
| 31 Kenya              | Low                              | 0.065            | \$34,280          | \$35,682  | 5.2             | 1,131    | 142.8         | \$250                          | \$240                     | \$883     |
| 32 Ghana              | Lower middle                     | 0.063            | \$44,612          | \$38,058  | 4.2             | 1,006    | 117.8         | \$323                          | \$379                     | \$746     |
| 33 Gabon              | Upper middle                     | 0.060            | \$29,826          | \$46,367  | 4.0             | 972      | 110.7         | \$419                          | \$269                     | \$613     |
| 34 Ethiopia           | Low                              | 0.057            | \$30,147          | \$28,881  | 6.5             | 1,128    | 181.8         | \$159                          | \$166                     | \$1,139   |
| 35 Sudan              | Lower middle                     | 0.057            | \$38,413          | \$24,940  | 4.2             | 2,620    | 136.6         | \$183                          | \$281                     | \$703     |
| 36 Afghanistan        | Low                              | 0.057            | \$28,770          | \$22,700  | 12.8            | 2,381    | 342.0         | \$66                           | \$84                      | \$935     |
| 37 Senegal            | Lower middle                     | 0.050            | \$34,969          | \$22,535  | 6.8             | 2,952    | 193.6         | \$116                          | \$181                     | \$768     |
| 38 Madagascar         | Low                              | 0.043            | \$28,770          | \$26,424  | 3.0             | 1,079    | 84.6          | \$312                          | \$340                     | \$1,025   |
| 39 Mauritania         | Lower middle                     | 0.042            | \$36,346          | \$31,642  | 4.4             | 1,397    | 123.1         | \$257                          | \$295                     | \$955     |
| 40 Namibia            | Upper middle                     | 0.038            | \$75,606          | \$106,711 | 5.9             | 856      | 150.8         | \$708                          | \$602                     | \$606     |
| 41 Eritrea            | Low                              | 0.033            | \$27,392          | \$26,191  | 2.8             | 1,117    | 78.5          | \$334                          | \$349                     | \$1,753   |
| 42 Haiti              | Low                              | 0.028            | \$30,836          | \$29,010  | 2.8             | 1,790    | 80.4          | \$361                          | \$384                     | \$869     |
| 43 India              | Lower middle                     | 0.027            | \$48,744          | \$40,648  | 3.4             | 713      | 96.2          | \$422                          | \$506                     | \$733     |
| 44 Myanmar            | Low                              | 0.026            | \$31,525          | \$29,473  | 1.7             | 673      | 48.0          | \$614                          | \$657                     | \$1,354   |
| 45 Yemen              | Lower middle                     | 0.025            | \$37,035          | \$27,682  | 3.5             | 1,778    | 99.3          | \$279                          | \$373                     | \$719     |
| 46 Pakistan           | Lower middle                     | 0.020            | \$41,856          | \$28,870  | 3.6             | 1,575    | 102.7         | \$281                          | \$407                     | \$904     |
| 47 Papua New Guinea   | Lower middle                     | 0.018            | \$40,479          | \$31,703  | 1.2             | 1,489    | 35.8          | \$885                          | \$1,130                   | \$864     |
| 48 Guatemala          | Lower middle                     | 0.016            | \$57,698          | \$35,999  | 1.8             | 1,813    | 51.6          | \$698                          | \$1,118                   | \$627     |
| 49 Cambodia           | Low                              | 0.014            | \$38,413          | \$33,905  | 1.3             | 759      | 37.6          | \$901                          | \$1,020                   | \$739     |
| 50 Nepal              | Low                              | 0.010            | \$30,836          | \$29,442  | 1.1             | 655      | 30.0          | \$982                          | \$1,028                   | \$883     |
| 51 Bolivia            | Lower middle                     | 0.010            | \$56,321          | \$41,435  | 0.2             | 1,162    | 8.2           | \$5,044                        | \$6,856                   | \$668     |
| 52 Iraq               | Upper middle                     | 0.009            | \$53,565          | \$37,274  | 1.7             | 1,493    | 50.4          | \$740                          | \$1,063                   | \$758     |
| 53 Algeria            | Upper middle                     | 0.008            | \$73,540          | \$60,354  | 1.3             | 753      | 38.2          | \$1,580                        | \$1,925                   | \$606     |
| 54 Indonesia          | Lower middle                     | 0.008            | \$56,321          | \$50,560  | 0.5             | 463      | 14.3          | \$3,545                        | \$3,949                   | \$793     |
| 55 Bangladesh         | Low                              | 0.007            | \$35,658          | \$32,480  | 0.8             | 617      | 23.0          | \$1,413                        | \$1,551                   | \$1,046   |
| 56 Russian Federation | High: nonOECD                    | 0.007            | \$143,794         | \$128,452 | 0.4             | 424      | 10.8          | \$11,898                       | \$13,319                  | \$579     |
| 57 Uzbekistan         | Lower middle                     | 0.006            | \$45,989          | \$34,086  | 0.5             | 1,357    | 14.9          | \$2,282                        | \$3,079                   | \$717     |
| 58 Morocco            | Lower middle                     | 0.006            | \$58,387          | \$49,883  | 1.1             | 898      | 31.6          | \$1,577                        | \$1,846                   | \$650     |
| 59 Ukraine            | Lower middle                     | 0.006            | \$74,228          | \$69,343  | 0.4             | 359      | 11.5          | \$6,052                        | \$6,479                   | \$600     |
| 60 Thailand           | Upper middle                     | 0.005            | \$90,759          | \$90,800  | 0.8             | 261      | 21.7          | \$4,177                        | \$4,175                   | \$622     |
| 61 Vietnam            | Lower middle                     | 0.005            | \$45,989          | \$42,516  | 0.3             | 478      | 8.2           | \$5,164                        | \$5,586                   | \$664     |
| 62 Malaysia           | Upper middle                     | 0.004            | \$138,284         | \$117,395 | 0.2             | 536      | 6.6           | \$17,673                       | \$20,818                  | \$591     |
| 63 Brazil             | Upper middle                     | 0.004            | \$104,534         | \$81,187  | 0.3             | 798      | 9.0           | \$9,029                        | \$11,626                  | \$581     |
| 64 Peru               | Upper middle                     | 0.004            | \$95,580          | \$73,664  | 0.3             | 862      | 9.6           | \$7,650                        | \$9,926                   | \$613     |
| 65 Colombia           | Upper middle                     | 0.003            | \$95,580          | \$75,850  | 0.3             | 817      | 8.8           | \$8,575                        | \$10,806                  | \$598     |
| 66 Mexico             | Upper middle                     | 0.003            | \$127,264         | \$129,804 | 0.1             | 0        | 3.2           | \$40,371                       | \$39,581                  | \$583     |
| 67 Philippines        | Lower middle                     | 0.003            | \$51,499          | \$44,213  | 0.3             | 743      | 8.8           | \$5,026                        | \$5,854                   | \$724     |
| 68 Argentina          | Upper middle                     | 0.003            | \$147,238         | \$119,687 | 0.2             | 633      | 6.8           | \$17,487                       | \$21,512                  | \$577     |
| 69 China              | Upper middle                     | 0.001            | \$84,560          | \$78,518  | 0.1             | 280      | 2.3           | \$33,785                       | \$36,384                  | \$638     |
| 70 Turkey             | Upper middle                     | 0.001            | \$125,197         | \$86,272  | 0.1             | 1,029    | 3.9           | \$22,267                       | \$32,314                  | \$582     |

Tech. Suppl. - Table 4. Results for Kenya, Bangladesh and Nigeria, per 1000 campaign participants.

|                              |                            | Malaria | Diarrhea | HIV        |            |            |
|------------------------------|----------------------------|---------|----------|------------|------------|------------|
|                              |                            | LLITN   | Filters  | VCT        | Condoms    | TOTAL      |
| <b>Kenya</b>                 |                            |         |          |            |            |            |
| <b>Disease averted</b>       | Deaths                     | 1.6     | 2.4      | 4.8        | 2.2        | 10.9       |
|                              | Episodes                   | 133.6   | 1,877.7  | 7.0        |            | 2,018.3    |
| <b>DALYs averted</b>         | Prevention                 | 44.1    | 68.3     | 40.0       | 18.2       | 170.6      |
|                              | Earlier HIV care           |         |          |            | 123.5      | 123.5      |
|                              | TOTAL                      | 44.1    | 68.3     | 181.8      |            | 294.1      |
| <b>Costs averted (added)</b> | Prevention                 | \$773   | \$9,068  | \$40,889   | \$18,588   | \$69,318   |
|                              | Earlier HIV care           |         |          |            | (\$81,187) | (\$81,187) |
|                              | TOTAL                      | \$773   | \$9,068  | (\$21,710) |            | -\$11,869  |
| <b>Cost-effective ness</b>   | Campaign cost (unadjusted) |         |          |            |            | \$34,280   |
|                              | Net cost (savings)         |         |          |            |            | \$46,149   |
|                              | Cost per DALY averted      |         |          |            |            | \$157      |
| <b>Bangladesh</b>            |                            |         |          |            |            |            |
| <b>Disease averted</b>       | Deaths                     | 0.1     | 0.8      | 0.0        | 0.0        | 0.9        |
|                              | Episodes                   | 14.7    | 1061.3   | 0.1        |            | 1076.1     |
| <b>DALYs averted</b>         | Prevention                 | 1.7     | 22.4     | 0.4        | 0.2        | 24.7       |
|                              | Earlier HIV care           |         |          |            | 1.2        | 1.2        |
|                              | TOTAL                      | 1.7     | 22.4     | 1.8        |            | 25.9       |
| <b>Costs averted (added)</b> | Prevention                 | \$89    | \$5,527  | \$389      | \$189      | \$6,196    |
|                              | Earlier HIV care           |         |          |            | (\$773)    | (\$773)    |
|                              | TOTAL                      | \$89    | \$5,527  | (\$195)    |            | \$5,422    |
| <b>Cost-effective ness</b>   | Campaign cost (unadjusted) |         |          |            |            | \$36,658   |
|                              | Net cost (savings)         |         |          |            |            | \$30,236   |
|                              | Cost per DALY averted      |         |          |            |            | \$1,168    |
| <b>Nigeria</b>               |                            |         |          |            |            |            |
| <b>Disease averted</b>       | Deaths                     | 6.0     | 3.4      | 2.7        | 1.3        | 13.4       |
|                              | Episodes                   | 734.3   | 2,363.3  | 4.0        |            | 3,101.7    |
| <b>DALYs averted</b>         | Prevention                 | 168.8   | 97.6     | 21.8       | 10.2       | 298.4      |
|                              | Earlier HIV care           |         |          |            | 70.8       | 70.8       |
|                              | TOTAL                      | 168.8   | 97.6     | 102.9      |            | 369.3      |
| <b>Costs averted (added)</b> | Prevention                 | \$6,223 | \$14,300 | \$28,605   | \$13,379   | \$62,507   |
|                              | Earlier HIV care           |         |          |            | (\$55,797) | (\$55,797) |
|                              | TOTAL                      | \$6,223 | \$14,300 | (\$14,813) |            | \$5,710    |
| <b>Cost-effective ness</b>   | Campaign cost (unadjusted) |         |          |            |            | \$40,479   |
|                              | Net cost (savings)         |         |          |            |            | \$34,769   |
|                              | Cost per DALY averted      |         |          |            |            | \$94       |

**Tech. Suppl. - Table 4.** Annual and cumulative results for campaigns 1 and 2 for Kenya, projected for 30 years. Assumes the second campaign starts 3 years after initial campaign. All outcomes discounted at 3% per annum.

| Year | Annual    |                   | Cumulative |               |                      | Annual DALYs averted |          |      |       | Cumulative DALYs averted |          |       |       |
|------|-----------|-------------------|------------|---------------|----------------------|----------------------|----------|------|-------|--------------------------|----------|-------|-------|
|      | Net costs | Net DALYs averted | Net costs  | DALYs averted | CE (\$/DALY averted) | Malaria              | Diarrhea | HIV  | Total | Malaria                  | Diarrhea | HIV   | Total |
| 1    | \$20,151  | 5.2               | \$20,151   | 5.2           | \$3,856              | 1.7                  | 3.2      | 0.3  | 5.2   | 1.7                      | 3.2      | 0.3   | 5.2   |
| 2    | \$4,168   | 6.0               | \$24,318   | 11.3          | \$2,161              | 1.6                  | 3.0      | 1.4  | 6.0   | 3.3                      | 6.2      | 1.7   | 11.3  |
| 3    | \$2,700   | 7.1               | \$27,019   | 18.3          | \$1,475              | 1.6                  | 2.9      | 2.6  | 7.1   | 4.9                      | 9.1      | 4.3   | 18.3  |
| 4    | \$27,259  | 11.6              | \$54,278   | 29.9          | \$1,817              | 1.9                  | 4.7      | 4.9  | 11.6  | 6.9                      | 13.8     | 9.2   | 29.9  |
| 5    | \$1,996   | 11.5              | \$56,274   | 41.4          | \$1,360              | 1.9                  | 4.5      | 5.1  | 11.5  | 8.7                      | 18.3     | 14.3  | 41.4  |
| 6    | \$2,136   | 11.5              | \$58,410   | 52.9          | \$1,104              | 1.8                  | 4.4      | 5.4  | 11.5  | 10.5                     | 22.7     | 19.7  | 52.9  |
| 7    | \$1,878   | 11.5              | \$60,288   | 64.4          | \$936                | 1.7                  | 3.9      | 5.9  | 11.5  | 12.2                     | 26.6     | 25.6  | 64.4  |
| 8    | \$874     | 11.2              | \$61,162   | 75.6          | \$809                | 1.7                  | 3.8      | 5.8  | 11.2  | 13.9                     | 30.3     | 31.4  | 75.6  |
| 9    | \$1,668   | 10.9              | \$62,830   | 86.5          | \$727                | 1.6                  | 3.7      | 5.6  | 10.9  | 15.5                     | 34.0     | 37.0  | 86.5  |
| 10   | \$1,786   | 10.6              | \$64,616   | 97.0          | \$666                | 1.6                  | 3.5      | 5.5  | 10.6  | 17.1                     | 37.5     | 42.4  | 97.0  |
| 11   | \$1,896   | 11.3              | \$66,511   | 108.3         | \$614                | 1.5                  | 3.4      | 6.3  | 11.3  | 18.6                     | 41.0     | 48.7  | 108.3 |
| 12   | \$2,149   | 12.0              | \$68,661   | 120.3         | \$571                | 1.5                  | 3.3      | 7.2  | 12.0  | 20.0                     | 44.3     | 55.9  | 120.3 |
| 13   | \$2,239   | 12.7              | \$70,900   | 133.0         | \$533                | 1.4                  | 3.2      | 8.0  | 12.7  | 21.5                     | 47.6     | 63.9  | 133.0 |
| 14   | \$2,100   | 14.3              | \$73,000   | 147.3         | \$496                | 1.4                  | 3.1      | 9.8  | 14.3  | 22.9                     | 50.7     | 73.7  | 147.3 |
| 15   | \$1,967   | 17.4              | \$74,967   | 164.7         | \$455                | 1.3                  | 3.1      | 13.0 | 17.4  | 24.2                     | 53.8     | 86.7  | 164.7 |
| 16   | \$1,840   | 17.2              | \$76,807   | 181.9         | \$422                | 1.3                  | 3.0      | 12.9 | 17.2  | 25.5                     | 56.7     | 99.7  | 181.9 |
| 17   | \$1,651   | 16.8              | \$78,458   | 198.8         | \$395                | 1.3                  | 2.9      | 12.7 | 16.8  | 26.8                     | 59.6     | 112.3 | 198.8 |
| 18   | \$1,471   | 16.6              | \$79,929   | 215.3         | \$371                | 1.2                  | 2.8      | 12.5 | 16.6  | 28.0                     | 62.4     | 124.9 | 215.3 |
| 19   | \$1,301   | 14.7              | \$81,230   | 230.1         | \$353                | 1.2                  | 2.7      | 10.8 | 14.7  | 29.2                     | 65.1     | 135.7 | 230.1 |
| 20   | \$1,139   | 14.4              | \$82,368   | 244.5         | \$337                | 1.2                  | 2.6      | 10.6 | 14.4  | 30.4                     | 67.8     | 146.3 | 244.5 |
| 21   | \$985     | 12.7              | \$83,354   | 257.2         | \$324                | 1.1                  | 2.6      | 9.0  | 12.7  | 31.5                     | 70.3     | 155.3 | 257.2 |
| 22   | \$840     | 8.8               | \$84,193   | 266.0         | \$317                | 1.1                  | 2.5      | 5.2  | 8.8   | 32.6                     | 72.8     | 160.6 | 266.0 |
| 23   | \$702     | 8.2               | \$84,895   | 274.2         | \$310                | 1.1                  | 2.4      | 4.8  | 8.2   | 33.7                     | 75.2     | 165.3 | 274.2 |
| 24   | \$571     | 7.8               | \$85,466   | 282.1         | \$303                | 1.0                  | 2.3      | 4.5  | 7.8   | 34.7                     | 77.6     | 169.8 | 282.1 |
| 25   | \$2,188   | 6.8               | \$87,653   | 288.9         | \$303                | 1.0                  | 2.3      | 3.5  | 6.8   | 35.7                     | 79.8     | 173.3 | 288.9 |
| 26   | \$2,020   | 6.6               | \$89,673   | 295.5         | \$304                | 1.0                  | 2.2      | 3.4  | 6.6   | 36.7                     | 82.1     | 176.7 | 295.5 |
| 27   | \$106     | 6.4               | \$89,779   | 301.9         | \$297                | 0.9                  | 2.1      | 3.3  | 6.4   | 37.6                     | 84.2     | 180.0 | 301.9 |
| 28   | \$617     | 6.2               | \$90,396   | 308.1         | \$293                | 0.9                  | 2.1      | 3.2  | 6.2   | 38.6                     | 86.3     | 183.3 | 308.1 |
| 29   | \$575     | 6.0               | \$90,971   | 314.1         | \$290                | 0.9                  | 2.0      | 3.1  | 6.0   | 39.4                     | 88.3     | 186.4 | 314.1 |
| 30   | \$0       | 5.9               | \$90,971   | 320.0         | \$284                | 0.9                  | 2.0      | 3.0  | 5.9   | 40.3                     | 90.3     | 189.4 | 320.0 |

Tech. Suppl. - Figure 1. Cost-effectiveness (Net IPC cost per DALY averted) and Opportunity Index (Campaign 2, n=70)

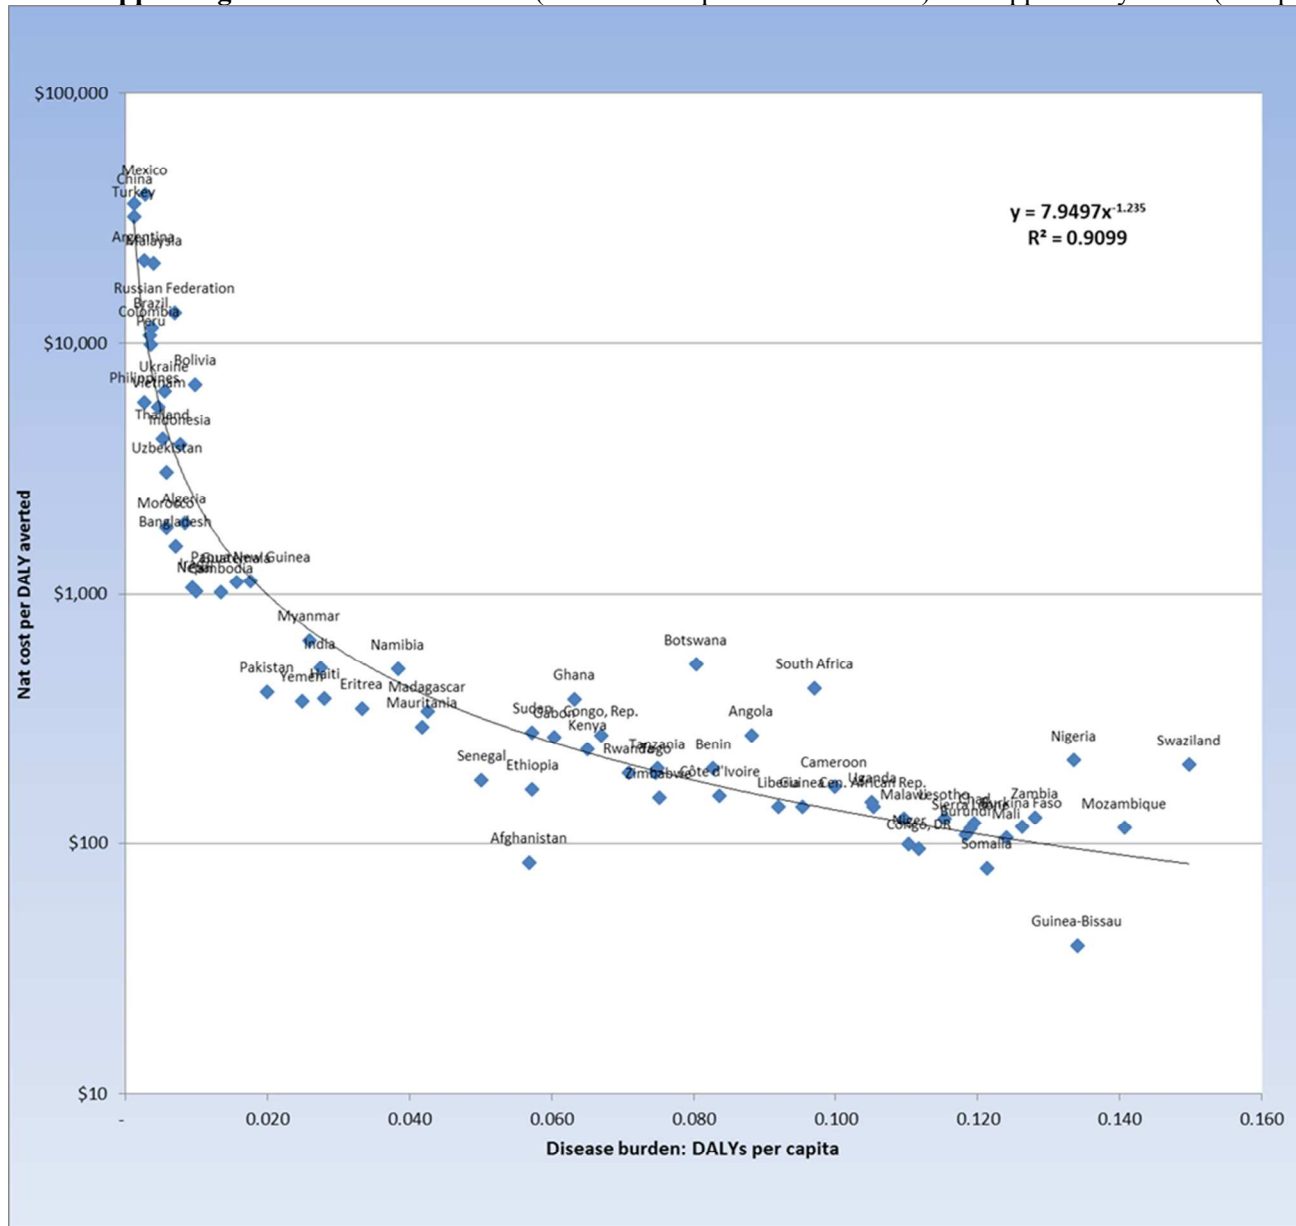

Tech. Suppl. - Figure 2. Tornado Graph of Cost per DALY averted – Bangladesh: Impact by Input

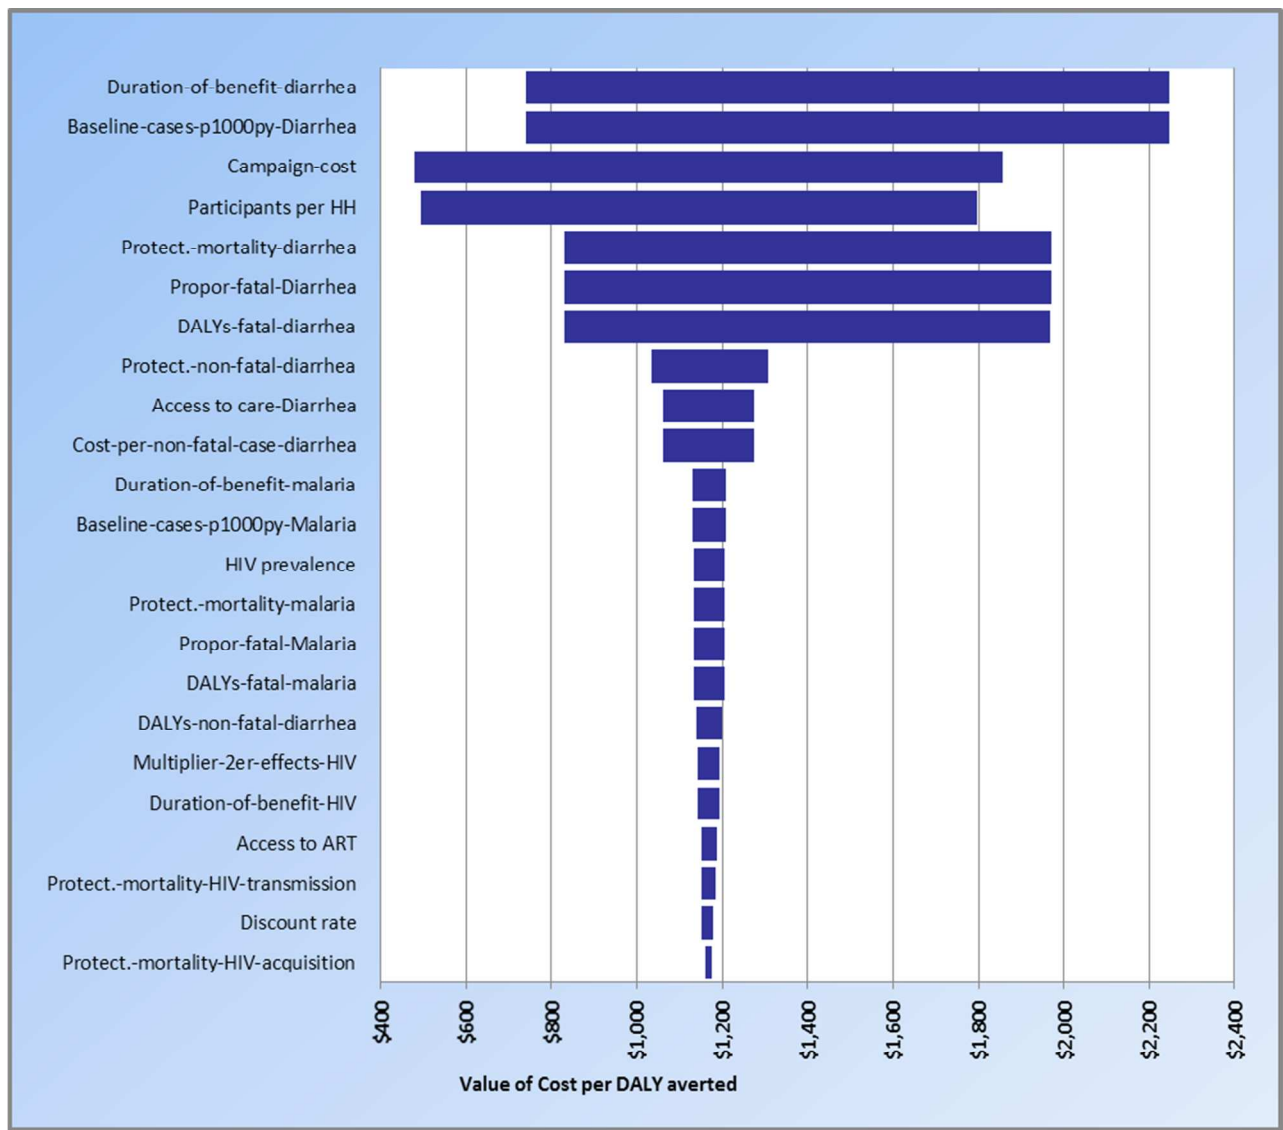

Only

1  
2  
3  
4  
5  
6  
7  
8  
9  
10  
11  
12  
13  
14  
15  
16  
17  
18  
19  
20  
21  
22  
23  
24  
25  
26  
27  
28  
29  
30  
31  
32  
33  
34  
35  
36  
37  
38  
39  
40  
41  
42  
43  
44  
45  
46  
47  
48  
49  
50  
51  
52  
53  
54  
55  
56  
57  
58  
59  
60

Tech. Suppl. - Figure 3. Tornado graph of cost per DALY averted – Kenya

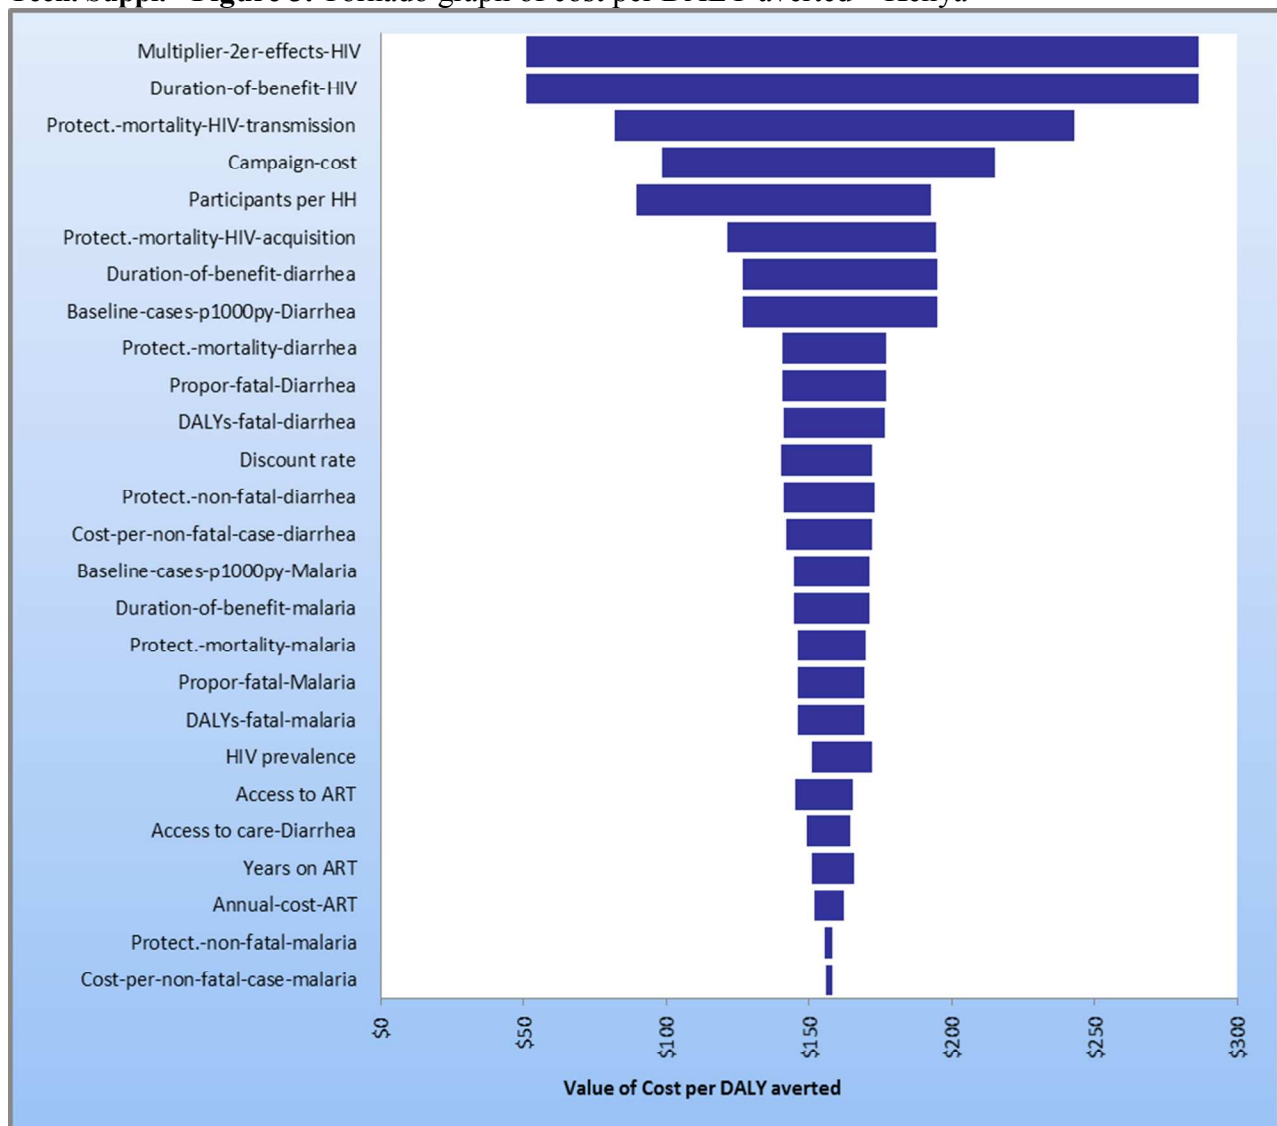

view only

1  
2  
3  
4  
5  
6  
7  
8  
9  
10  
11  
12  
13  
14  
15  
16  
17  
18  
19  
20  
21  
22  
23  
24  
25  
26  
27  
28  
29  
30  
31  
32  
33  
34  
35  
36  
37  
38  
39  
40  
41  
42  
43  
44  
45  
46  
47  
48  
49  
50  
51  
52  
53  
54  
55  
56  
57  
58  
59  
60

**Tech. Suppl. - Figure 4.** Result of 20,000-trial Monte Carlo simulation: Correlation between input values and cost per DALY averted – Bangladesh.

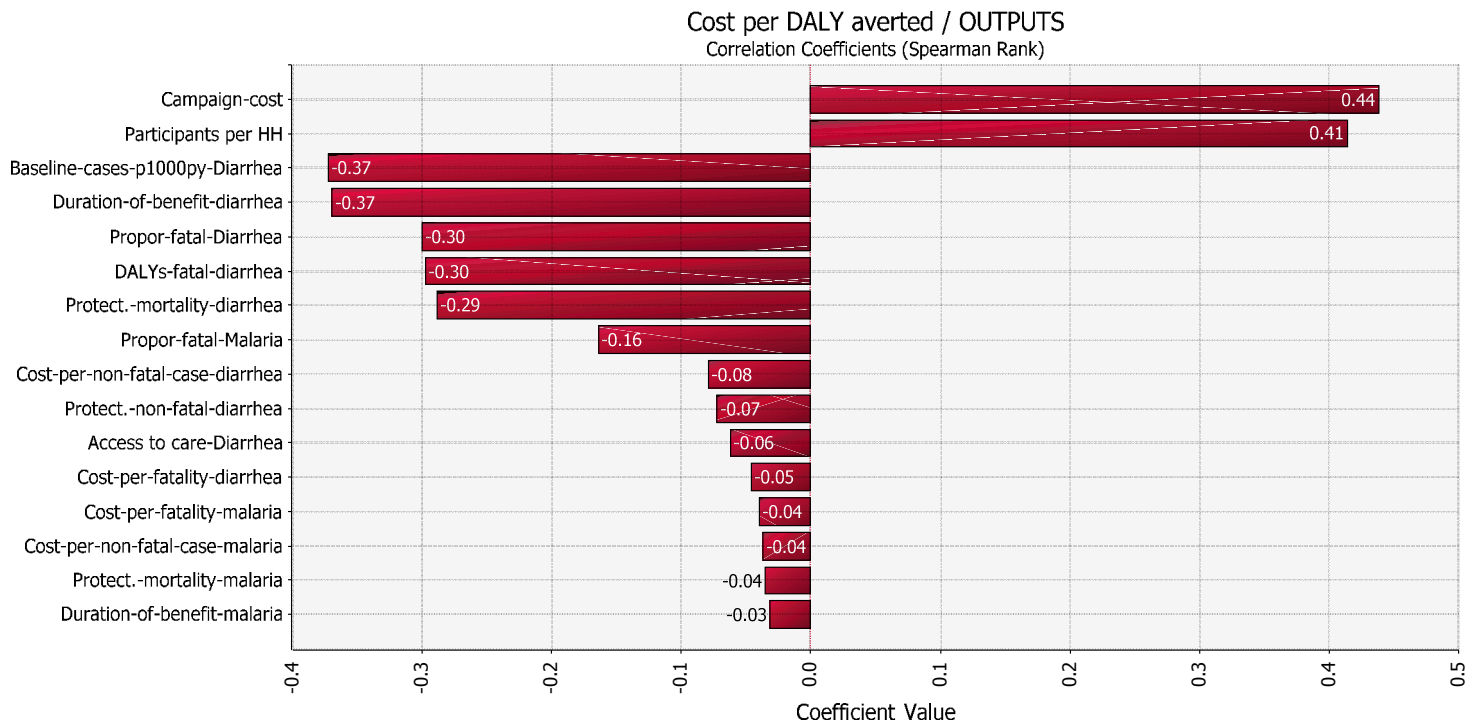



**Tech Suppl. - Figure 5.** Result of 20,000-trial Monte Carlo simulation: Correlation between input values and cost per DALY averted – Kenya.

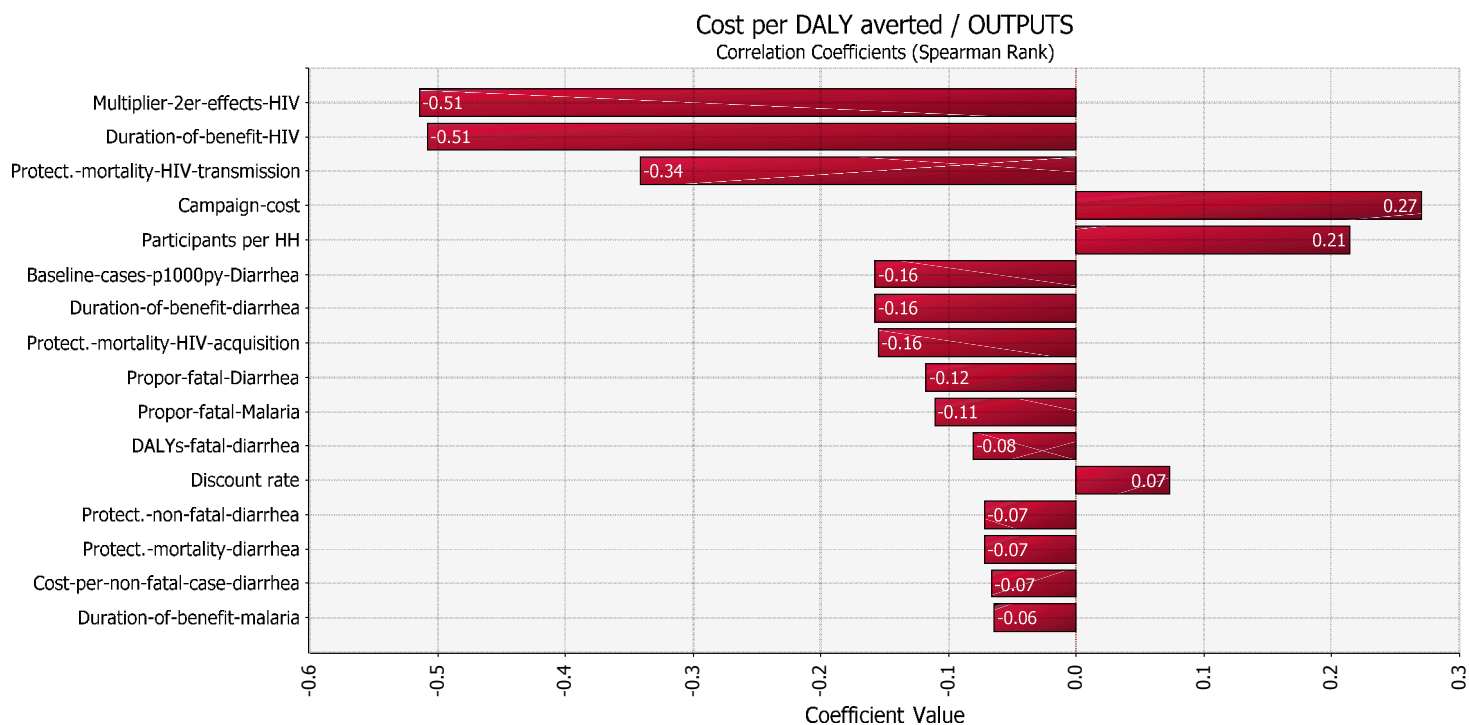

### Projection of costs and outcomes to 30 years

We projected cumulative costs and outcomes of the IPC campaign in Kenya for 30 years, assuming an initial campaign and a second campaign three years later (Figure 6). Costs and benefits of the two campaigns were added and reflect the lower effectiveness of the second campaign. The large rise in costs in year 4 reflects the initiation of the second campaign, and the gradual increase in cumulative costs over time reflects the costs of additional HIV treatment. The steadily rising cumulative net DALYs averted reflects the averted morbidity during the period of bed net and water filter efficacy, but is largely determined by the distribution of saved life years due to averted mortality from all three diseases during the period of IPC benefit. Distribution of benefits were made according to the following assumptions:

- HIV deaths would occur on average 15 years after infection.
- Assumes those detected are all put on ART year of campaign.
- Earlier and more ART die to earlier detection distributed over 15 and 20 years respectively.
- HIV mortality prevention in secondary partners starts on average in year 20 after the campaign and is distributed over 20 years.
- 50% of prevented HIV mortality occurred in the index patient
- Life-expectancy at the time of the campaign was 60 years for averted mortality in malaria and diarrhea patients.
- Malaria and diarrhea morbidity reduction is confined to the campaign itself.

**Tech Suppl. - Figure 6.** Discounted cumulative net costs, and DALYs averted for two IPC campaigns in Kenya, projected to 30 years, per 1,000 participants.

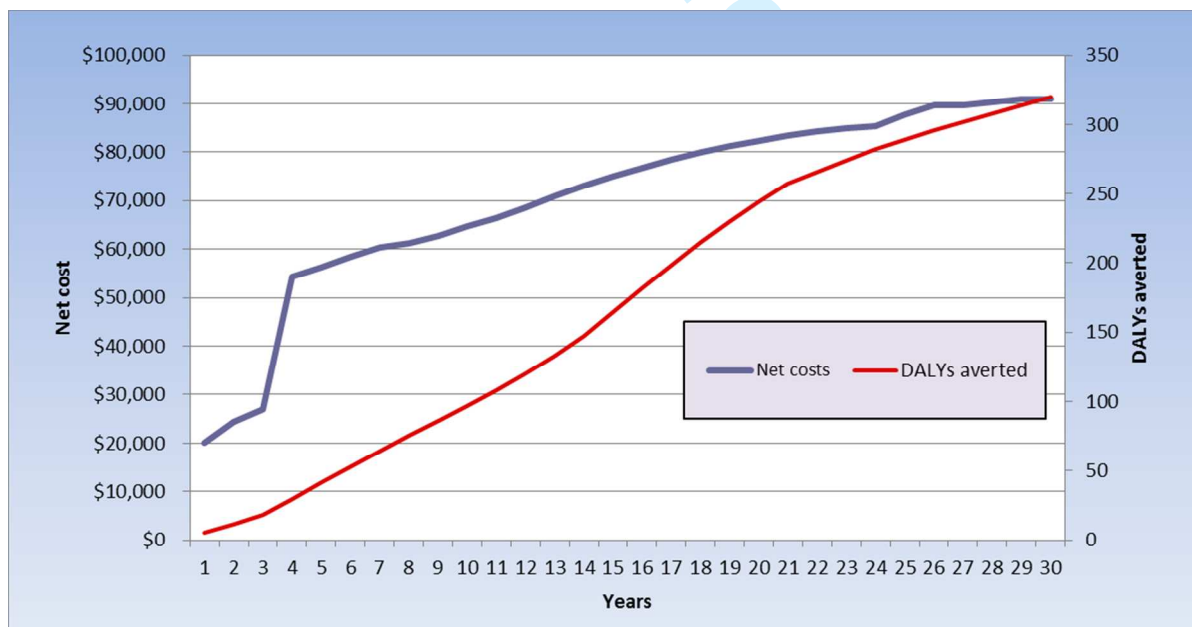

## References

- 1
- 2 1. Kahn, J.G., E. Marseille, and B. Auvert, *Cost-effectiveness of male circumcision for HIV prevention in a*
- 3 *South African setting*. PLoS Med, 2006. 3(12): p. e517.
- 4 2. Fischer Walker, C.L., et al., *Diarrhea incidence in low- and middle-income countries in 1990 and 2010: a*
- 5 *systematic review*. BMC Public Health, 2012. 12: p. 220.
- 6 3. UNICEF, *The State of the World's Children 2011. Table 6: Demographic Indicators: under 5 population*
- 7 *(2010)*, 2011.
- 8 4. UN Department of Economic and Social Affairs - Population Division, *World Population Prospects, 2010*
- 9 *Revision, 2010*.
- 10 5. The World Bank, *Population, total*.
- 11 6. Kahn, J.G., et al., *Integrated HIV testing, malaria, and diarrhea prevention campaign in Kenya: modeled*
- 12 *health impact and cost-effectiveness*. PLoS One, 2012. 7(2): p. e31316.
- 13 7. ICF International. *MEASURE DHS STATcompiler*. 2012 June 13, 2013]; Available from:
- 14 <http://www.statcompiler.com/>.
- 15
- 16
- 17
- 18
- 19
- 20
- 21
- 22
- 23
- 24
- 25
- 26
- 27
- 28
- 29
- 30
- 31
- 32
- 33
- 34
- 35
- 36
- 37
- 38
- 39
- 40
- 41
- 42
- 43
- 44
- 45
- 46
- 47
- 48
- 49
- 50
- 51
- 52
- 53
- 54
- 55
- 56
- 57
- 58
- 59
- 60

# BMJ Open

## Scaling up integrated prevention campaigns for global health: Costs and cost-effectiveness in 70 countries

|                                 |                                                                                                                                                                                                                                                                                                                                                                                                                                                |
|---------------------------------|------------------------------------------------------------------------------------------------------------------------------------------------------------------------------------------------------------------------------------------------------------------------------------------------------------------------------------------------------------------------------------------------------------------------------------------------|
| Journal:                        | <i>BMJ Open</i>                                                                                                                                                                                                                                                                                                                                                                                                                                |
| Manuscript ID:                  | bmjopen-2013-003987.R1                                                                                                                                                                                                                                                                                                                                                                                                                         |
| Article Type:                   | Research                                                                                                                                                                                                                                                                                                                                                                                                                                       |
| Date Submitted by the Author:   | 21-May-2014                                                                                                                                                                                                                                                                                                                                                                                                                                    |
| Complete List of Authors:       | Marseille, Elliot; Health Strategies International, Jiwani, Aliya; Health Strategies International, Raut, Abhishek; Johns Hopkins Bloomberg School of Public Health, International Health Verguet, Stephane; University of Washington, Department of Global Health Walson, Judd; University of Washington, Department of Global Health Kahn, James; University of California, San Francisco, Philip R. Lee Institute for Health Policy Studies |
| <b>Primary Subject Heading</b>: | Global health                                                                                                                                                                                                                                                                                                                                                                                                                                  |
| Secondary Subject Heading:      | Global health, Health economics, Health policy, Health services research, HIV/AIDS                                                                                                                                                                                                                                                                                                                                                             |
| Keywords:                       | HEALTH ECONOMICS, Health policy < HEALTH SERVICES ADMINISTRATION & MANAGEMENT, HIV & AIDS < INFECTIOUS DISEASES, Tropical medicine < INFECTIOUS DISEASES, Epidemiology < TROPICAL MEDICINE                                                                                                                                                                                                                                                     |
|                                 |                                                                                                                                                                                                                                                                                                                                                                                                                                                |

SCHOLARONE™  
Manuscripts

only

1  
2  
3  
4  
5  
6  
7  
8  
9  
10  
11  
12  
13  
14  
15  
16  
17  
18  
19  
20  
21  
22  
23  
24  
25  
26  
27  
28  
29  
30  
31  
32  
33  
34  
35  
36  
37  
38  
39  
40  
41  
42  
43  
44  
45  
46  
47  
48  
49  
50  
51  
52  
53  
54  
55  
56  
57  
58  
59  
60

## Scaling up integrated prevention campaigns for global health: Costs and cost-effectiveness in 70 countries

Elliot Marseille<sup>1\*</sup>, MPP, DrPH; Aliya Jiwani<sup>2</sup>, MPH; Abhishek Raut<sup>3</sup>, MD; Stéphane Verguet<sup>4</sup>, PhD; Judd Walson<sup>5</sup>, MD; James G. Kahn<sup>6</sup>, MD

### Author affiliations:

<sup>1</sup> Health Strategies International, 555 59<sup>th</sup> street, Oakland, CA, 94609, USA

<sup>2</sup> Health Strategies International, 1138 North Vernon St., Arlington, VA, 22201, USA

<sup>3</sup> Department of International Health, Johns Hopkins Bloomberg School of Public Health, Baltimore, Maryland 21205

<sup>4</sup> Department of Global Health, University of Washington, Box 359909, 325 Ninth Avenue, Seattle, WA 98115, USA

<sup>5</sup> Departments of Global Health, Medicine, Pediatrics, and Epidemiology, University of Washington, Box 359909, 325 Ninth Avenue, Seattle, WA 98115, USA

<sup>6</sup> Philip R. Lee Institute for Health Policy Studies, University of California, San Francisco, 3333 California Street Suite 265, Box 0936, San Francisco, CA 94118; Global Health Sciences, University of California, San Francisco, 50 Beale Street, 12<sup>th</sup> floor, San Francisco, CA 94105

### \*Corresponding author information:

Elliot Marseille

[emarseille@comcast.net](mailto:emarseille@comcast.net)

925-998-5745

## Abstract

**Objectives.** This study estimated the health impact, cost, and cost-effectiveness of an integrated prevention campaign (IPC) focused on diarrhea, malaria, and HIV in 70 countries ranked by per-capita disability-adjusted life-year (DALY) burden for the three diseases.

**Methods.** We constructed a deterministic cost-effectiveness model portraying an IPC combining counseling and testing, cotrimoxazole prophylaxis, referral to treatment, and condom distribution for HIV prevention; bed nets for malaria prevention; and provision of household water filters for diarrhea prevention. We developed a mix of empirical and modeled cost and health impact estimates applied to all 70 countries. One-way, multi-way and scenario sensitivity analyses were conducted to document the strength of our findings. We used a health care payer's perspective, discounted costs and DALYs at 3% per year, and denominated cost in 2012 U.S. dollars.

**Primary and secondary outcomes:** The primary outcome was cost-effectiveness expressed as net cost per DALY averted. Other outcomes included cost of the IPC; net IPC costs adjusted for averted and additional medical costs; and DALYs averted.

**Results.** Implementation of the IPC in the 10 most cost-effective countries at 15% population coverage would cost \$583 million over three years (adjusted costs of \$398 million), averting 8.0 million DALYs. Extending IPC programs to all 70 of the identified high-burden countries at 15% coverage would cost an adjusted \$51.3 billion and avert 78.7 million DALYs. Incremental cost-effectiveness ranged from \$49 per DALY averted for the 10 countries with the most favourable cost-effectiveness to \$119, \$181, \$335, \$1,692 and \$8,340 per DALY averted as each successive group of 10 countries is added ordered by decreasing cost-effectiveness.

**Conclusion.** IPC appears cost-effective in many settings, and has the potential to substantially reduce the burden of disease in resource-poor countries. This study increases confidence that IPC can be an important new approach for enhancing global health.

## Strengths and limitations of this study.

### *Strengths*

- Synthesizes a large volume of epidemiological data from disparate sources into a unified method for projecting the consequence of IPC implementation in 70 countries.
- Links the “opportunity index” concept with cost-effectiveness.
- Provides a more comprehensive assessment of intervention potential than assessment of cost-effectiveness alone.
- Methods presented here may be applied to other disease areas and facilitate more objective resource allocation decision-making for global health.

### *Limitations*

- Incomplete availability of data relevant to the large number of countries analyzed.
- Infeasible to develop cost-effectiveness thresholds that reflected the full array of local public health options against which IPC could be considered.
- Regions or urban areas within countries may have costs and health benefits that depart from the overall country assessments.

## Background

For many years, vertical (disease-specific) programming has dominated the sphere of global health funding in an effort to tackle the areas of greatest need.<sup>1</sup> However, there is increasing recognition that, among diseases with complementary prevention strategies and overlapping populations, single-disease approaches to population health improvement create duplication of effort and miss important opportunities for synergies in health benefits and economies of scope.<sup>2</sup> Recent initiatives have therefore sought to integrate programs for multiple diseases, and many have demonstrated feasibility, efficiencies and success.<sup>3,4</sup>

A particularly promising example of integrated programming was a prevention campaign in Western Province, Kenya that targeted diarrhea, malaria, and HIV,<sup>5</sup> three diseases that account for a substantial portion of the total disease burden in many parts of the developing world.<sup>6</sup> Over the course of one week, the campaign provided general health education, condoms, insecticide-treated bed nets (ITNs), point-of-use water filters, and HIV testing and counseling to more than 80% of the target population.<sup>5</sup> Those testing positive for HIV were offered on-site CD4 count determination, cotrimoxazole prophylaxis, and referral to comprehensive HIV care and treatment. The campaign yielded large health benefits and net economic savings.<sup>7,8</sup> Large-scale expansion of this integrated prevention campaign (IPC) has the potential to deliver substantial health benefits and cost savings. In a separate study, we reviewed country-specific data for 70 low- and middle-income countries, finding that the opportunity for a diarrhea, malaria and HIV IPC is not limited to Kenya.<sup>9</sup> It is plausible that IPCs can have a large impact on health in many resource-limited settings.

While the cost-effectiveness of this IPC in Western Kenya has been established<sup>8</sup>, the economic and health effects of a multi-country IPC initiative are unknown. Using data appropriate for providing an initial indication of the conditions under which IPC is likely to be cost-effective, we estimated the costs, health outcomes, and cost-effectiveness of IPC implementation in the same 70 low- and middle-income countries. To support decision-making for IPC implementation, we also estimate the increases in budgets that would be required to cover increasing numbers of countries.

## Methods

### *Overview*

We modeled the health impact, cost, and cost-effectiveness of a diarrhea, malaria, and HIV IPC in 70 countries by adapting a previously-published spreadsheet-based model that was applied to the original IPC in Western Kenya.<sup>8</sup> Countries were chosen for inclusion in the analysis based on two factors: they were classified as low- or middle-income as defined by the World Bank<sup>10</sup>; and they had a total DALY (Disability-adjusted-life-year) burden for the three diseases addressed by the IPC in the highest tertile of the 214 World Bank-defined economies (i.e.,  $\geq 87,000$  DALYs); as described in a companion paper.<sup>9</sup> We refer to this ordering of countries by the combined disease burden as the “opportunity index”. For a break-down of the relative contribution by disease to each country’s total burden see Jiwani 2014 and Table 4 of the Technical Supplement). We derived incidence and case fatality rates for each country from published



1  
2  
3 reports, using regional averages and other approximations when country-specific estimates were  
4 missing. We developed a mix of empirical (where available) and modeled (projected from  
5 empirical data) cost estimates applied to all 70 countries. Key outcomes examined included the  
6 cost of the IPC; net IPC costs adjusting for averted and additional medical costs; deaths and  
7 disease episodes averted; DALYs averted due to prevention, and to earlier and more HIV care;  
8 and finally, cost-effectiveness expressed as net cost per DALY averted. We used a health care  
9 payer's perspective, and discounted long-term costs and DALYs at 3% per year.<sup>11</sup> Costs were  
10 denominated in 2012 U.S. dollars. The time frame of the analysis is three years for the empirical  
11 data. Modeled results depend upon the age-dependent life expectancy at the time death would  
12 otherwise occurred in Kenya. This is 61 years for diarrheal diseases and malaria, and 37 years for  
13 HIV  
14

### 15 16 17 18 *Detailed model features*

19 We adapted a Microsoft Excel spreadsheet that we had previously constructed to analyze the  
20 cost-effectiveness of the Kenya IPC. Details of the model have been published elsewhere.<sup>8</sup> The  
21 model estimates the health and cost benefits of prevention for malaria, diarrhea, and HIV  
22 separately. For HIV, it also estimates the DALYs averted and costs incurred due to earlier  
23 diagnosis and treatment arising from HIV testing. Cost-effectiveness of the IPC was compared to  
24 the cost-effectiveness of ART in each of the 70 countries. This metric was selected since, with  
25 the current aspiration of universal access to ART,<sup>12</sup> provision of ART is on the active policy  
26 agenda for most HIV-affected countries.  
27  
28

29 *Cost estimates and projection methods.* Campaign costs for the Kenya IPC were obtained from  
30 published empirical data supplemented by filter repair and replacement costs.<sup>7,8</sup> We estimated  
31 campaign costs for each country using the Kenya IPC as a benchmark, translating to other  
32 countries according to type of cost, as follows. Program costs were classified as commodity,  
33 personnel and other costs. Commodities were further categorized as tradable and non-tradable.  
34 Tradable commodities are those purchased on the international market and include bed nets,  
35 filters, and condoms, and required no adjustment from the dollar-denominated costs incurred by  
36 the Kenya IPC.<sup>7</sup> The cost of non-tradable items, primarily personnel, were adjusted according to  
37 the per-capita GDP ratio, in International dollars, between Kenya and each study country.<sup>13</sup> For  
38 each country, we estimated the costs of averted medical care due to the IPC by adjusting the  
39 costs for health care incurred per fatal and non-fatal case in the Kenya campaign by the ratio of  
40 GDP per capita in the target country versus Kenya. We selected per capita GDP rather than per  
41 capita health care spending as the basis for these adjustments, because the latter reflects overall  
42 access to care and our model accounts for access separately. (For a comparison of three cost  
43 adjustment methods and evidence of similar resulting cost estimates, see Technical Supplement).  
44  
45  
46  
47

48 There are few country-specific data on access to care for malaria except for some of the more-  
49 affected countries, mostly in Africa. We therefore used global average rates of treatment access,  
50 estimated at 68.4% based on published literature.<sup>14-19</sup> (See Technical Appendix for the country-  
51 specific figures underlying this value). As noted in Table 2, the value of 68.4% was varied from  
52 51.3% to 85.5% in sensitivity analyses. For access to care for diarrhea, we used country-specific  
53 estimates based on demographic and health survey data on the percent of children under five  
54 years of age with diarrhea in the two weeks preceding the survey who received any kind of  
55 treatment for diarrhea.<sup>20</sup> We used an average rate of access to ART of 70%. This is considerably  
56  
57  
58  
59  
60

1  
2  
3 higher than the 56% access reported for sub-Saharan Africa<sup>21</sup> and reflects likely increases in the  
4 context of the global commitment to access.<sup>12</sup>  
5  
6

7 We calculated the per person-year cost of ART for each country by using published estimates for  
8 countries where available.<sup>22-42</sup> The non-drug portion of each published unit cost figure was  
9 inflated to 2012 US dollars using the U.S. CPI.<sup>43</sup> We then derived from the set of published  
10 figures an average figure for low-income, lower middle-income excluding India, and upper-  
11 middle income countries as defined by the World Bank.<sup>44</sup> We applied these country income-  
12 category averages to the larger set of countries for which published ART unit cost estimates were  
13 unavailable, according to their respective income categories. ART cost-effectiveness for each  
14 country was estimated by adjusting \$883 per DALY averted which is the average for 45 sites  
15 studied in Zambia.<sup>26</sup> To arrive at country-specific estimates we calculated the ratio of per-capita  
16 income between each country and Zambia and applied this factor to the average portion of  
17 overall ART costs for low-income countries which is non-tradable, 36.9%. This figure was  
18 derived from the ART unit cost studies described above which includes the breakdown of costs  
19 by major component.  
20  
21  
22

23  
24 *First versus second campaign health benefits.* The health benefits of a second campaign are  
25 likely to be lower than that of the initial campaign. For malaria this is due to residual benefits  
26 from nets, beyond their average functional life of three years. In the absence of a second  
27 campaign, we assume a malaria risk in years 4-6 equal to 75% of the risk at baseline (before the  
28 first campaign). For diarrheal disease the filters themselves are not expected to confer benefit  
29 after 3 years, though there may be residual benefit from the behavioral component; we assume  
30 that the risk is 87.5% of baseline. New nets and filters in a second campaign reduce disease risks  
31 to the levels expected after the first campaign. Thus the second campaign reduces the incidence  
32 of malaria from 75% to 50% of baseline (a 1/3 relative reduction). Similarly, diarrhea decreases  
33 from 87.5% to 37% of baseline (a relative drop of 58%). (Details in technical supplement)  
34  
35

36  
37 *Disease specific data and projection methods.* We obtained country estimates of the prevalence  
38 of HIV in the adult (15–49 years) population.<sup>42 45 46</sup> For each country, we derived estimates of  
39 the baseline cases of malaria per person-year by dividing WHO-adjusted estimates of the annual  
40 number of cases<sup>47</sup> by the total country population<sup>48</sup>. For diarrhea, we estimated the average  
41 number of cases per person-year in the overall population using DHS data on the number of  
42 cases per year in children under 5<sup>49</sup> (details in technical supplement).<sup>50 51</sup> Multiplying each  
43 estimate by the total population<sup>48</sup> yields the estimated number of cases in each country.  
44  
45

46 We calculated country-specific case fatality rates for malaria and diarrhea as the number of  
47 deaths due to the disease<sup>52 53</sup> divided by the number of cases. We set an upper-bound malaria  
48 case fatality rate of 15% based on published findings of a Delphi survey of malaria experts.<sup>54</sup> We  
49 assumed a case fatality rate for HIV of 100%.  
50  
51

52 Using a discount rate of 3%<sup>55</sup>, we estimated the DALYs incurred with each fatal case of malaria  
53 and diarrhea at 28 based on life expectancy at age 25 in Kenya (the estimated average age of  
54 death from malaria and diarrhea) of 61 years.<sup>56</sup> We derived estimates of the DALYs incurred per  
55 non-fatal case of each disease as the product of the disability weight (0.191 for malaria and 0.105  
56 for diarrhea)<sup>57</sup> and the average duration of each case (7 days for malaria<sup>58</sup>; 4.43 days for  
57  
58  
59  
60

1  
2  
3 diarrhea, a severity weighted duration for children and adults<sup>59</sup>; or 0.0037 and 0.0013 DALYs for  
4 each non-fatal case of malaria and diarrhea, respectively. Assuming 70% access to ART, we  
5 estimated 10.6 DALYs incurred per HIV infection, and 8.8 discounted DALYs averted per  
6 treated case of HIV, an assumption based on 22 years of antiretroviral therapy (ART), average  
7 age of ART initiation of 35 years, and a life expectancy at age 35 in Kenya of 37 years.<sup>56</sup> Each  
8 untreated HIV case incurs 15.1 discounted DALYs.  
9  
10

11 *Household size and beneficiaries per household.* Using country-specific data of rural household  
12 size as reported in the most recent Demographic and Health Survey, divided by the number of  
13 participants per household as observed in the Kenya IPC campaign, we obtained the number of  
14 beneficiaries per campaign participant. For bednets, we assumed fewer incremental beneficiaries  
15 per participant on the assumption that there was some prior access to bednets, 15.1% on average,  
16 as observed in the Kenya campaign. For HIV we assumed the same number of adult participants  
17 on average, 2.5, as the basis for calculating the number of beneficiaries per campaign participant.  
18  
19

20  
21 For the remaining health inputs, we assumed values equal to those used in the Kenya analysis for  
22 all countries.<sup>8</sup> See Table 1 for base case values and sources for data inputs.  
23  
24

### 25 **Table 1 about here**

#### 26 *Relationship of opportunity to cost-effectiveness*

27 In a companion article, we identified the countries in which scale-up of a diarrhea, malaria, and  
28 HIV IPC would be most beneficial, by summarizing country-specific epidemiological data  
29 related to the disease burden and shortfall in current intervention coverage (Jiwani et al, under  
30 review, 2013). We created three “opportunity indices,” ranking countries by 1) DALYs per  
31 capita across the three diseases of the IPC, 2) a sum of burden ranks for each disease, and 3) a  
32 composite of burden and intervention opportunity. Here, we extend this opportunity analysis by  
33 examining the relationship between a country’s opportunity rank (in DALYs per capita) and its  
34 cost-effectiveness for IPC implementation.  
35  
36  
37  
38

39 *Sensitivity analyses.* To assess the effect of uncertainty in inputs, we conducted one-way and  
40 multi-way Monte Carlo sensitivity analyses for three countries: Kenya, a low-income country  
41 where the IPC trial was performed and is at the 44<sup>th</sup> percentile for cost-effectiveness of the 70  
42 countries analyzed; Nigeria, a lower-middle income country at the 75<sup>th</sup> percentile (relatively  
43 favorable); and Bangladesh, a low-income country at the 25<sup>th</sup> percentile. Each of 31 model inputs  
44 examined in the sensitivity analyses (Table 2) was assigned a beta distribution with alpha and  
45 beta parameters of 2, in order to ensure symmetry around the mean. Maximum and minimum  
46 values were set as 1.5 and 0.5 times the base case, except for access to malaria and diarrhea  
47 treatment (0.75 to 1.25 of base case) and access to HIV treatment (0.6 to 1.4 times base case).  
48 Figures in bold font reflect parameter values that vary by country. Finally, we examined the  
49 effect of variations in important inputs on the cost-effectiveness of IPC in all 70 countries  
50 grouped in order of cost-effectiveness.  
51  
52  
53

### 54 **Table 2 about here**

## Results

Across the 70 high opportunity countries, the cost-effectiveness of the first campaign ranges from \$7 (Guinea-Bissau) to \$15,886 (China) per DALY averted (IQR \$96 - \$1,071 per DALY averted) (Table 3). At \$182 per DALY averted, Pakistan is at the 50<sup>th</sup> percentile for cost-effectiveness. With the exception of Afghanistan, the 30 countries with the most favorable cost-effectiveness are in sub-Saharan Africa. The cost-effectiveness of IPC compares favorably to the cost-effectiveness of ART in 51 countries. The 30 countries with the lowest cost-effectiveness estimates are geographically more diverse and include only three in sub-Saharan Africa (Swaziland, South Africa, and Namibia).

As shown in Figure 1, per-capita disease burden as measured by the opportunity index is highly correlated with cost-effectiveness. See Figure 1 of the Technical Supplement for relationship between opportunity index and cost-effectiveness for campaign 2.

**Table 3 and Figure 1 about here.**

Table 4 displays the cumulative results, grouped in 10-country increments, assuming 15% population coverage, and moving from most to least attractive cost-effectiveness. IPC in the top 10 countries would cost \$583 million for the three-year campaign, with a net cost after adjusting for effects on health care spending of \$398 million for the first three-year campaign and \$468 million for the second and subsequent campaigns. The first and second campaigns would avert 8.0 and 5.7 million DALYs respectively with an average cost-effectiveness of \$49 and \$82 per DALY averted, respectively. As shown in the right-hand two columns, the incremental cost-effectiveness rises rapidly (becomes less favorable) after coverage of the top 50 countries. In particular, if expanding from the top 50 to 60 countries and from 60 to all 70 countries, large net incremental costs are associated with relatively modest increases in health benefits. The cost per DALY averted in expanding from 60 to 70 countries is \$8,340 and \$19,728 for campaigns 1 and 2, respectively.

For each stratum of 10 countries ranked from most to least cost-effective, Table 5 displays the median cost-effectiveness for the first three-year campaigns, for possible second campaigns, and for ART. The cost-effectiveness of the first campaign compares more favorably to ART by a wide margin for each of the 10-country strata. For the second campaign ART is more cost-effective than IPC for the 51<sup>st</sup> – 60<sup>th</sup> and for the 61<sup>st</sup> – 70<sup>th</sup> country, as ranked by IPC cost-effectiveness.

**Tables 4 and 5 about here.**

Results for Kenya, Bangladesh, and Nigeria illustrate reasons for variation across countries.

In Nigeria, the IPC cost-effectiveness ratio is \$94 per DALY averted, 18<sup>th</sup> of 70 countries ranked by cost-effectiveness. This result represents high health benefits for malaria and diarrhea, and modest benefits for HIV. For every 1,000 IPC participants, the first campaign averts an estimated

1  
2  
3 13.4 deaths: 6.0 due to malaria, 3.4 due to diarrhea, and 4.0 due to HIV. The campaign costs are  
4 \$40,479, with net costs of \$34,769 after offsetting savings from averted care needs.  
5  
6

7 In Kenya, cost-effectiveness is somewhat less attractive, at \$157 per DALY averted, 31<sup>st</sup> of 70  
8 countries. This is due to lower malaria and diarrhea benefits than in Nigeria, and more  
9 discovered HIV. For every 1,000 IPC participants, the campaign averts an estimated 10.9 deaths:  
10 1.6 due to malaria, 2.4 to diarrhea, and 7.0 to HIV. The campaign costs \$34,280. Although  
11 reduced disease creates offsetting savings in care needs, there are \$81,000 in *added* HIV costs  
12 due to earlier and additional detection of HIV. The net cost of the campaign is \$46,149, or \$157  
13 per DALY averted. This is less than the \$883 per DALY averted for ART in Kenya.  
14  
15

16 In Bangladesh, the IPC cost-effectiveness ratio is \$1,168 per DALY averted, 53<sup>rd</sup> of 70 countries.  
17 This is due to lower health benefits overall. For every 1,000 IPC participants, the campaign  
18 averts an estimated 0.9 deaths: 0.1 due to malaria, 0.8 due to diarrhea, and only 0.1 due to HIV.  
19 The campaign costs are \$35,658. When adjusted for modest offsetting savings from averted care,  
20 the net cost of the campaign is \$30,236. Cost-effectiveness is comparable with the estimated  
21 \$1,046 per DALY averted for ART for HIV. See Table 5 of the technical supplement for detailed  
22 results for all three countries.  
23  
24

## 25 Sensitivity analyses

26 *One-way sensitivity analysis.* Figure 2 is a tornado graph of the sensitivity of IPC cost-  
27 effectiveness to the model inputs displayed in Table 2 for Nigeria. IPC participants per  
28 household had the greatest effect on IPC cost-effectiveness (range, \$126 per DALY averted),  
29 followed by the multiplier that reflects prevention of secondary HIV transmission, the duration  
30 of the prevention benefits of HIV interventions (range, \$122 per DALY averted each), cost of the  
31 IPC campaign (range, \$110 per DALY averted), and the reduction in mortality due to reduced  
32 HIV transmission (range, \$83 per DALY averted).  
33  
34  
35

### 36 Figure 2 about here

37  
38 For Bangladesh, the inputs with the greatest effect on cost-effectiveness are duration of benefits  
39 for diarrhea prevention and the baseline cases of diarrhea per 1,000 person-years (range, \$1,506  
40 per DALY averted for both), campaign cost (range, \$1,377 per DALY averted), IPC participants  
41 per household (range, \$1,305 per DALY averted), and protective benefit against diarrhea  
42 mortality (range, \$1,140 per DALY averted). For Kenya, the variables with the most influence  
43 on cost-effectiveness are the multiplier that reflects prevention of secondary HIV transmission  
44 and the duration of the prevention benefits of HIV interventions (range, \$236 per DALY averted  
45 each), the reduction in mortality due to reduced HIV transmission (range, \$161 per DALY  
46 averted), cost of the IPC campaign (range, \$117 per DALY averted), and the number of  
47 participants per household (range, \$103 per DALY averted). See Technical Supplement Figures  
48 2 and 3 for one-way sensitivity analysis tornado graphs for Bangladesh and Kenya respectively.  
49  
50  
51  
52

53 Figure 3 shows how variation in three inputs affects incremental cost-effectiveness as each  
54 successive 10 countries are added to a scaled-up IPC program. Up to 50 countries, IPC remains  
55 cost-effective compared with ART even if the least favorable end of the input estimate range is  
56 used.  
57  
58  
59  
60

**Figure 3 about here**

*Multivariate Monte Carlo sensitivity analysis.* Table 6 displays the 80% confidence interval for a 20,000-trial simulation for three outcomes: DALYs averted, net costs, and net cost per DALY averted (cost-effectiveness). For Kenya and Nigeria the least favorable end of the cost-effectiveness range is more favorable than the cost-effectiveness of ART for HIV, \$304 versus \$883 per DALY averted for Kenya and \$208 versus \$747 per DALY averted for Nigeria. For Bangladesh, the least favorable end of the cost-effectiveness range, \$2,547 is *less* favorable than the estimated \$1,046 per DALY averted for ART. For Nigeria the five most important variables in order of their correlation with cost-effectiveness (net cost per DALY averted) are, the duration of the HIV prevention benefits ( $r = -0.51$ ); prevention of secondary HIV transmission ( $r = -0.50$ ), the number of IPC participants per household ( $r = 0.33$ ), cost of the IPC campaign ( $r = 0.31$ ), and the reduction in mortality due to reduced HIV transmission ( $r = -0.24$ ), (Figure 4). See Technical Supplement Figures 4 and 5 for multivariate sensitivity analyses correlations coefficients for Kenya and Bangladesh, for projection of IPC costs and benefits in Kenya for 30 years (Technical Supplement Figure 6).

*Scenario Analysis: IPC cost-effectiveness with HIV costs and outcomes omitted.* Finally, we report on the cost and cost-effectiveness of the IPC program if HIV program costs and health benefits are ignored. These results reflect the perspective of a payer who assumes responsibility for the diarrhea and malaria components only. When future HIV-related costs and benefits are disregarded, including both additional care costs due to more and earlier detection and reductions in care costs due to prevention, the cost per DALY averted decreases from \$157 to \$129 in Kenya; from \$94 to \$31 in Nigeria; and increases from \$1,168 to \$819 in Bangladesh.

**Table 6 and Figure 4 about here.****Discussion**

We examined the costs and health benefits of IPC for 70 countries with a high combined burden of diarrhea, malaria and HIV. Together these countries comprise 76% of the world population<sup>48</sup> and 98% of its disease burden.<sup>9</sup> If implemented with 15% population coverage in the top 40 of the 70 countries as ordered by cost-effectiveness, 47.3 million DALYs could be averted at a net cost of \$4.9 billion, or \$104 per DALY averted. As shown in Table 3, this compares favorably with the cost-effectiveness of ART in each of those 40 countries. The DALYs averted constitute 58% of the disease burden due to HIV, malaria and diarrheal disease in these countries. \$4.9 billion is considerably less than the President's request to the United States Congress for FY 2013 for \$6.4 billion for the PEPFAR program<sup>60</sup> and thus might be affordable from a donor's perspective, especially if the current trend of greater host country financial contribution to HIV programs continues. With the exception of Afghanistan, all 30 of the countries in which IPC was most cost-effective are in sub-Saharan Africa and in 51 countries, the cost-effectiveness of IPC compared favorably to ART.

1  
2  
3 The cost-effectiveness of IPCs varies greatly among the 70 countries we examined. This wide  
4 divergence is due primarily to differences in disease burden and therefore to the higher levels of  
5 incremental health benefit generated per incremental dollar spent for prevention. For example,  
6 Nigeria ranks 4<sup>th</sup> of the 70 countries based on DALYs per capita in the three diseases of the IPC,  
7 and Bangladesh ranks 55<sup>th</sup>. As shown in Figure 1, per-capita disease burden as measured by the  
8 opportunity index is highly correlated with cost-effectiveness. In the case of a single disease-  
9 intervention pair such a finding would be unsurprising since the cost-effectiveness of most  
10 prevention interventions depend importantly on incidence. It is more noteworthy here since the  
11 relative prevalence of the three diseases varies greatly between the countries we studied, and the  
12 effect on medical care costs of intervening also varies substantially among the three diseases. In  
13 spite of this variability, the opportunity index is a reasonably good guide to cost-effectiveness.  
14  
15  
16

17  
18 Costs of program delivery also matter. Swaziland, Botswana and South Africa have relatively  
19 unfavorable cost-effectiveness in relation to their disease burden. This is due primarily to their  
20 high per-capita GDP and thus the higher estimated non-commodity (mainly personnel) portion of  
21 their campaign costs. However, IPC cost-effectiveness still compares favorably to that of ART in  
22 all three countries.  
23

24  
25 Sensitivity of findings within each country reflects how the IPC interacts with local disease  
26 burden. Diarrhea is the largest contributor to the disease burden in Bangladesh, accounting for  
27 87% of the DALYs averted by the IPC campaign. Not surprisingly, the most important  
28 determinant of cost-effectiveness was the estimated duration of the benefits of the water filter  
29 and the baseline incidence of diarrhea. Kenya has a far larger HIV epidemic, with a prevalence  
30 of 6.3% rather than 0.06% of adults as in Bangladesh. Accordingly, the largest determinants of  
31 IPC cost-effectiveness in Kenya were HIV-related in both one-way and multivariate sensitivity  
32 analyses. Nigeria's HIV prevalence of 3.6% is close to the average of 3.5% of the 70 countries  
33 examined. Nigeria's high IPC cost-effectiveness ranking is due to its high incidence of malaria  
34 and diarrhea, 252 and 765 cases per 1,000 person-years respectively, compared with median  
35 values of 52 and 521 for malaria and diarrhea respectively for the 70 countries studied.  
36  
37  
38

39  
40 Among the strengths of the current study are its synthesis of a large volume of epidemiological  
41 data from disparate sources into a unified method for projecting the consequence of IPC  
42 implementation in 70 countries, and the linking of the "opportunity index" concept with cost-  
43 effectiveness. This provides a more comprehensive assessment of intervention potential than  
44 assessment of cost-effectiveness alone. This data-driven process may be applied to other disease  
45 areas and facilitate more objective resource allocation decision-making.  
46

47  
48 Limitations of our approach include incomplete availability of data relevant to the large number  
49 of countries analyzed. Methods for approximation were therefore necessary. For example, the  
50 costs of the campaigns themselves were extrapolated from empirical Kenya-specific data using  
51 per-capita GDP ratios between Kenya and the other countries to estimate the non-tradable  
52 commodity portion of costs. For other variables such as the protective effects of HIV prevention,  
53 bed nets and water filters where country-specific information was absent we employed wide  
54 ranges in the sensitivity analyses to ensure that we accounted for uncertainty, and this produced  
55 wide confidence intervals around the model outcomes.  
56  
57  
58  
59  
60

1  
2  
3 This study provides substantial evidence that IPC campaigns can be cost-effective in a large  
4 number of low and middle-income countries epidemic settings. However, it leaves unanswered  
5 important questions that need to be addressed when these broad findings are translated into  
6 programs and policies. For example, in settings with high prevalence of both HIV and malaria, as  
7 community HIV prevalence is reduced, malaria susceptibility may decline, thus reducing the  
8 benefits associated with malaria prevention. Such interactions are not accounted for in our  
9 analysis. In some countries the relative contributions of each disease to the total burden imposed  
10 by all three disease is uneven.<sup>9</sup> (See Table 4 of the Technical Supplement for a breakdown of the  
11 contribution of each disease to the total for all three diseases). Swaziland, for example, has a  
12 high burden of HIV and a low burden of malaria. In Swaziland and similar settings, it may be  
13 sensible to focus the IPC campaign in areas of relatively high malaria endemicity, by other  
14 means to target the malaria prevention component. Our cost projections posit relatively low IPC  
15 coverage, 15%. At this level it is reasonable to assume that in most countries, many high-  
16 prevalence areas would not be fully covered and planners need not be concerned that a point of  
17 diminishing returns would be met in which it becomes more costly to cover the next community,  
18 while the benefit of covering that community might decline. However, prior to implementation,  
19 country-specific analyses would be required to determine for which subset of countries it would  
20 be more cost-effective to scale up to higher coverage levels even if it means that some countries  
21 are excluded from implementation altogether. The current study also was not designed to  
22 consider how program costs and effectiveness might vary according to whether a more vertical  
23 or more integrated approach is adopted, or depending on the level of prior scale of existing  
24 diarrheal disease, malaria or HIV programs. These important program design considerations will  
25 depend on the organization of the health care system in each of the countries considering an IPC  
26 program.  
27  
28  
29  
30  
31  
32

33 Because we looked at a large number of countries, we could not explore specific countries in  
34 detail. It was infeasible to develop cost-effectiveness thresholds that reflected the full array of  
35 local public health options against which IPC could be considered. Comparing IPC with the  
36 estimated cost-effectiveness of ART for HIV does not account for the potential intervention  
37 options that are more efficient than both IPC and ART. In addition, there may be substantial  
38 regions or urban areas within countries that have costs, health benefits that depart from the  
39 overall country assessments to which our analysis is confined. Finally, we were not able to  
40 evaluate the cost to patients of seeking care and were thus unable to adopt a full societal  
41 perspective. Since disease prevention averts the need for these expenditures, our results may  
42 under-estimate net costs and thus cost-effectiveness. The current analysis should not displace  
43 investigation of potential opportunities for efficient IPC implementation in high disease burden  
44 areas within countries.  
45  
46  
47

48 This study increases confidence that IPC can be an important new approach for enhancing global  
49 health. IPC appears to be cost-effective compared to ART for HIV in many settings, and has the  
50 potential to substantially reduce the burden of disease in poor countries. If implemented with  
51 15% population coverage in the top 40 of the 70 countries as ordered by cost-effectiveness, 47.3  
52 million DALYs could be averted at a net cost of \$4.9 billion, or \$104 per DALY averted. The  
53 specific countries, or number of countries, a donor may want to fund will depend on resource  
54 availability, and this analysis provides substantial guidance to decision makers aiming to predict  
55  
56  
57  
58  
59  
60



1  
2  
3  
4  
5  
6  
7  
8  
9  
10  
11  
12  
13  
14  
15  
16  
17  
18  
19  
20  
21  
22  
23  
24  
25  
26  
27  
28  
29  
30  
31  
32  
33  
34  
35  
36  
37  
38  
39  
40  
41  
42  
43  
44  
45  
46  
47  
48  
49  
50  
51  
52  
53  
54  
55  
56  
57  
58  
59  
60

the costs and benefits of various levels of investments in IPC programs. If taken to scale, IPC can be a highly efficient strategy for improving global health.

For peer review only

**Author contributions**

EM conceived and designed the study, conducted the analyses, and drafted and revised the paper.

AJ provided data for the study, helped with the analyses and drafting and revision. AR provided data for the study and revised the draft paper. SV and JW critiqued the analysis helped with specifying data inputs, and revised the draft paper. JGK helped guide design and implementation of the study, helped with specifying data inputs and edited the paper.

**Data sharing**

No additional data available.

**Conflicts of interest**

None declared.

## References

1. De Maeseneer J, van Weel C, Egilman D, Mfenyana K, Kaufman A, Sewankambo N. Strengthening primary care: addressing the disparity between vertical and horizontal investment. *The British journal of general practice : the journal of the Royal College of General Practitioners* 2008;58(546):3-4.
2. Brady MA, Hooper PJ, Ottesen EA. Projected benefits from integrating NTD programs in sub-Saharan Africa. *Trends Parasitol* 2006;22(7):285-91.
3. Linehan M, Hanson C, Weaver A, Baker M, Kabore A, Zoerhoff KL, et al. Integrated implementation of programs targeting neglected tropical diseases through preventive chemotherapy: proving the feasibility at national scale. *The American journal of tropical medicine and hygiene* 2011;84(1):5-14.
4. Desormeaux J, Johnson MP, Coberly JS, Losikoff P, Johnson E, Huebner R, et al. Widespread HIV counseling and testing linked to a community-based tuberculosis control program in a high-risk population. *Bulletin of the Pan American Health Organization* 1996;30(1):1-8.
5. Lugada E, Millar D, Haskew J, Grabowsky M, Garg N, Vestergaard M, et al. Rapid implementation of an integrated large-scale HIV counseling and testing, malaria, and diarrhea prevention campaign in rural Kenya. *PloS one* 2010;5(8):e12435.
6. Murray CJ, Vos T, Lozano R, Naghavi M, Flaxman AD, Michaud C, et al. Disability-adjusted life years (DALYs) for 291 diseases and injuries in 21 regions, 1990-2010: a systematic analysis for the Global Burden of Disease Study 2010. *Lancet* 2012;380(9859):2197-223.
7. Kahn JG, Harris B, Mermin JH, Clasen T, Lugada E, Grabowksy M, et al. Cost of community integrated prevention campaign for malaria, HIV, and diarrhea in rural Kenya. *BMC health services research* 2011;11:346.
8. Kahn JG, Muraguri N, Harris B, Lugada E, Clasen T, Grabowsky M, et al. Integrated HIV testing, malaria, and diarrhea prevention campaign in Kenya: modeled health impact and cost-effectiveness. *PloS one* 2012;7(2):e31316.
9. Jiwani A, Matheson A, Kahn JG, Raut A, Verguet S, Marseille E, et al. Integrated disease prevention campaigns: assessing country opportunity for implementation via an index approach. *BMJ open* 2014;4(3):e004308.
10. The World Bank. How we Classify Countries. [cited 2012 September 4]; . Available from: <http://data.worldbank.org/about/country-classifications>., 2012.
11. World Bank. *World Development Report 1993: Investing in Health*. New York, N.Y.: Oxford University Press, 1993.
12. United Nations. Resolution adopted by the General Assembly: 65/1. Keeping the promise: united to achieve the Millenium Development Goals, 2010.
13. Central Intelligence Agency. Country comparison: GDP per capita (PPP), 2012.
14. Mbonye AK. Prevalence of childhood illnesses and care-seeking practices in rural Uganda. *TheScientificWorldJournal* 2003;3:721-30.
15. Hetzel MW, Obrist B, Lengeler C, Msechu JJ, Nathan R, Dillip A, et al. Obstacles to prompt and effective malaria treatment lead to low community-coverage in two rural districts of Tanzania. *BMC public health* 2008;8:317.

16. Alba S, Dillip A, Hetzel MW, Mayumana I, Mshana C, Makemba A, et al. Improvements in access to malaria treatment in Tanzania following community, retail sector and health facility interventions -- a user perspective. *Malaria journal* 2010;9:163.
17. Das A, Ravindran TS. Factors affecting treatment-seeking for febrile illness in a malaria endemic block in Boudh district, Orissa, India: policy implications for malaria control. *Malaria journal* 2010;9:377.
18. Smith LA, Bruce J, Gueye L, Helou A, Diallo R, Gueye B, et al. From fever to anti-malarial: the treatment-seeking process in rural Senegal. *Malaria journal* 2010;9:333.
19. Littrell M, Gatakaa H, Evance I, Poyer S, Njogu J, Solomon T, et al. Monitoring fever treatment behaviour and equitable access to effective medicines in the context of initiatives to improve ACT access: baseline results and implications for programming in six African countries. *Malaria journal* 2011;10:327.
20. ICF International. STATcompiler - % of children under 5 with diarrhea in 2 wks preceding survey who received any kind of treatment: Measure DHS, 2012.
21. UNAIDS. Sub-Saharan Africa, Regional fact sheet. 2012.
22. Galarraga O, Wirtz VJ, Figueroa-Lara A, Santa-Ana-Tellez Y, Coulibaly I, Viisainen K, et al. Unit costs for delivery of antiretroviral treatment and prevention of mother-to-child transmission of HIV: a systematic review for low- and middle-income countries. *PharmacoEconomics* 2011;29(7):579-99.
23. Kitajima T, Kobayashi Y, Chaipah W, Sato H, Chadbunchachai W, Thuennadee R. Costs of medical services for patients with HIV/AIDS in Khon Kaen, Thailand. *Aids* 2003;17(16):2375-81.
24. Menzies NA, Berruti AA, Berzon R, Filler S, Ferris R, Ellerbrock TV, et al. The cost of providing comprehensive HIV treatment in PEPFAR-supported programs. *Aids* 2011;25(14):1753-60.
25. Marseille E, Kahn JG, Pitter C, Bunnell R, Epalatai W, Jawe E, et al. The cost effectiveness of home-based provision of antiretroviral therapy in rural Uganda. *Applied health economics and health policy* 2009;7(4):229-43.
26. Marseille E, Giganti M, Mwangi A. Taking ART to Scale: Determinants of the Cost and Cost-Effectiveness of Antiretroviral Therapy in 45 Clinical Sites in Zambia. *PLoS ONE*. - In Press 2012.
27. Hounton SH, Akonde A, Zannou DM, Bashi J, Meda N, Newlands D. Costing universal access of highly active antiretroviral therapy in Benin. *AIDS Care* 2008;20(5):582-7.
28. Bikilla AD, Jerene D, Robberstad B, Lindtjorn B. Cost estimates of HIV care and treatment with and without anti-retroviral therapy at Arba Minch Hospital in southern Ethiopia. *Cost effectiveness and resource allocation : C/E* 2009;7:6.
29. Koenig SP, Riviere C, Leger P, Severe P, Atwood S, Fitzgerald DW, et al. The cost of antiretroviral therapy in Haiti. *Cost effectiveness and resource allocation : C/E* 2008;6:3.
30. Jaffar S, Amuron B, Foster S, Birungi J, Levin J, Namara G, et al. Rates of virological failure in patients treated in a home-based versus a facility-based HIV-care model in Jinja, southeast Uganda: a cluster-randomised equivalence trial. *Lancet* 2009;374(9707):2080-9.
31. Gupta I, M. Trivedi, S. Kandamuthan. Recurrent costs of India's free ART program, in HIV and AIDS in South Asia: an economic development risk., M. Haacker and M. Claeson, Editors. Washington, DC: World Bank, 2009: p. xxvi, 244.

- 1  
2  
3  
4 32. John KR, Rajagopalan N, Madhuri KV. Brief communication: economic comparison of  
5 opportunistic infection management with antiretroviral treatment in people living  
6 with HIV/AIDS presenting at an NGO clinic in Bangalore, India. *MedGenMed :  
7 Medscape general medicine* 2006;8(4):24.
- 8 33. Kombe G, Smith O, Nwagbara C. Scaling Up Antiretroviral Treatment in the Public  
9 Sector in Nigeria: A Comprehensive Analysis of Resource Requirements: Report  
10 issued by PHRplus and Abt Associates, 2004.
- 11 34. Aracena-Genao B, Navarro JO, Lamadrid-Figueroa H, Forsythe S, Trejo-Valdivia B. Costs  
12 and benefits of HAART for patients with HIV in a public hospital in Mexico. *Aids*  
13 2008;22 Suppl 1:S141-8.
- 14 35. Bautista-Arredondo S, Dmytraczenko T, Kombe G, Bertozzi SM. Costing of scaling up  
15 HIV/AIDS treatment in Mexico. *Salud publica de Mexico* 2008;50 Suppl 4:S437-44.
- 16 36. Cleary SM, McIntyre D, Boulle AM. The cost-effectiveness of antiretroviral treatment in  
17 Khayelitsha, South Africa--a primary data analysis. *Cost effectiveness and resource  
18 allocation : C/E* 2006;4:20.
- 19 37. Martinson N, Mohapi L, Bakos D, Gray GE, McIntyre JA, Holmes CB. Costs of providing  
20 care for HIV-infected adults in an urban HIV clinic in Soweto, South Africa. *Journal of  
21 acquired immune deficiency syndromes* 2009;50(3):327-30.
- 22 38. Rosen S, Long L, Sanne I. The outcomes and outpatient costs of different models of  
23 antiretroviral treatment delivery in South Africa. *Tropical medicine & international  
24 health : TM & IH* 2008;13(8):1005-15.
- 25 39. Deghaye N, Pawinski RA, Desmond C. Financial and economic costs of scaling up the  
26 provision of HAART to HIV-infected health care workers in KwaZulu-Natal. *S Afr  
27 Med J* 2006;96(2):140-3.
- 28 40. Harling G, Wood R. The evolving cost of HIV in South Africa: changes in health care cost  
29 with duration on antiretroviral therapy for public sector patients. *Journal of  
30 acquired immune deficiency syndromes* 2007;45(3):348-54.
- 31 41. Kevany S, Meintjes G, Rebe K, Maartens G, Cleary S. Clinical and financial burdens of  
32 secondary level care in a public sector antiretroviral roll-out setting (G. F. Jooste  
33 Hospital). *S Afr Med J* 2009;99(5):320-5.
- 34 42. Gapminder. Data in Gapminder World. *Estimated HIV prevalence % (ages 15-49)*.
- 35 43. US Dept. of Labor Bureau of Labor Statistics. Consumer Price Index - All Urban  
36 Consumers (CPI-U). Washington, DC, 2013.
- 37 44. The World Bank. How we Classify Countries, 2012.
- 38 45. Ethiopia Federal HIV/AIDS Prevention and Control Office. Country Progress Report on  
39 HIV/AIDS Response: Federal Democratic Republic of Ethiopia, 2012.
- 40 46. Republique Democratique Du Congo - Programme National Multisectoriel de Lutte  
41 Contre le Sida (PNMLS). Rapport d'Activite Sure la Riposte au VIH/SIDA en  
42 R.D.Congo 2012.
- 43 47. Cibulskis RE, Aregawi M, Williams R, Otten M, Dye C. Worldwide incidence of malaria in  
44 2009: estimates, time trends, and a critique of methods. *PLoS medicine*  
45 2011;8(12):e1001142.
- 46 48. The World Bank. Population, total: The World Bank, 2010.
- 47 49. Fischer Walker CL, Perin J, Aryee MJ, Boschi-Pinto C, Black RE. Diarrhea incidence in  
48 low- and middle-income countries in 1990 and 2010: a systematic review. *BMC  
49 public health* 2012;12:220.
- 50  
51  
52  
53  
54  
55  
56  
57  
58  
59  
60

- 1
- 2
- 3
- 4 50. UN Department of Economic and Social Affairs - Population Division. World Population
- 5 Prospects, 2010 Revision, 2010.
- 6 51. UNICEF. The State of the World's Children 2011. Table 6: Demographic Indicators:
- 7 under 5 population (2010), 2011.
- 8 52. Institute for Health Metrics and Evaluation. Malaria Mortality Estimates by Country
- 9 1980-2010, 2009.
- 10 53. World Health Organization. Global Health Observatory Data Repository. *Global Burden*
- 11 *of Disease*. Geneva, 2011.
- 12 54. Lubell Y, Staedke SG, Greenwood BM, Kanya MR, Molyneux M, Newton PN, et al. Likely
- 13 health outcomes for untreated acute febrile illness in the tropics in decision and
- 14 economic models; a Delphi survey. *PloS one* 2011;6(2):e17439.
- 15 55. The World Bank. World Development Report 1993: Investing in Health 1993.
- 16 56. World Health Statistics 2012. Life tables for WHO Member States. Geneva: World Health
- 17 Organization, 2009.
- 18 57. Mathers CD, Lopez AD, Murray CJL. The Burden of Disease and Mortality by Condition:
- 19 Data, Methods, and Results for 2001. In: Lopez AD, Mathers CD, Ezzati M, Jamison
- 20 DT, Murray CJL, editors. *Global Burden of Disease and Risk Factors*. Washington (DC),
- 21 2006.
- 22 58. Snow R, Newton C, Craig M, Steketee R. The Public Health Burden of Plasmodium
- 23 falciparum Malaria in Africa: Deriving the Numbers. . *Disease Control Priorities*
- 24 *Project Working Paper No. 11*. Bethesda, Maryland: Fogarty International Center,
- 25 National Institutes of Health, 2003.
- 26 59. Lamberti LM, Fischer Walker CL, Black RE. Systematic review of diarrhea duration and
- 27 severity in children and adults in low- and middle-income countries. *BMC public*
- 28 *health* 2012;12:276.
- 29 60. Kaiser Family Foundation. The U.S. President's Emergency Plan for AIDS Relief
- 30 (PEPFAR), 2013.
- 31 61. World Health Organization. Global Burden of Disease. Table 1: Estimated total deaths
- 32 ('000), by cause, sex and WHO Member State, 2008, 2011.
- 33 62. Walensky RP, Wolf LL, Wood R, Fofana MO, Freedberg KA, Martinson NA, et al. When to
- 34 start antiretroviral therapy in resource-limited settings. *Annals of internal medicine*
- 35 2009;151(3):157-66.
- 36 63. Mermin J, Lule J, Ekwaru JP, Malamba S, Downing R, Ransom R, et al. Effect of co-
- 37 trimoxazole prophylaxis on morbidity, mortality, CD4-cell count, and viral load in
- 38 HIV infection in rural Uganda. *Lancet* 2004;364(9443):1428-34.
- 39 64. Ayieko P, Akumu AO, Griffiths UK, English M. The economic burden of inpatient
- 40 paediatric care in Kenya: household and provider costs for treatment of pneumonia,
- 41 malaria and meningitis. *Cost effectiveness and resource allocation : C/E* 2009;7:3.
- 42 65. Lengeler C. Insecticide-treated bed nets and curtains for preventing malaria. *The*
- 43 *Cochrane database of systematic reviews* 2004(2):CD000363.
- 44 66. Clasen T, Haller L, Walker D, Bartram J, Cairncross S. Cost-effectiveness of water quality
- 45 interventions for preventing diarrhoeal disease in developing countries. *J Water*
- 46 *Health* 2007;5(4):599-608.
- 47 67. Denison JA, O'Reilly KR, Schmid GP, Kennedy CE, Sweat MD. HIV voluntary counseling
- 48 and testing and behavioral risk reduction in developing countries: a meta-analysis,
- 49 1990--2005. *AIDS and behavior* 2008;12(3):363-73.
- 50
- 51
- 52
- 53
- 54
- 55
- 56
- 57
- 58
- 59
- 60

- 1  
2  
3  
4 68. Weller S, Davis K. Condom effectiveness in reducing heterosexual HIV transmission. *The*  
5 *Cochrane database of systematic reviews* 2002(1):CD003255.  
6 69. Smith DL, Cohen JM, Moonen B, Tatem AJ, Sabot OJ, Ali A, et al. Infectious disease.  
7 Solving the Sisyphean problem of malaria in Zanzibar. *Science*  
8 2011;332(6036):1384-5.  
9 70. Kahn JG, Marseille E, Auvert B. Cost-effectiveness of male circumcision for HIV  
10 prevention in a South African setting. *PLoS medicine* 2006;3(12):e517.  
11 71. Mulligan JA, Yukich J, Hanson K. Costs and effects of the Tanzanian national voucher  
12 scheme for insecticide-treated nets. *Malaria journal* 2008;7:32.  
13 72. Kilian A, Byamukama W, Pigeon O, Atieli F, Duchon S, Phan C. Long-term field  
14 performance of a polyester-based long-lasting insecticidal mosquito net in rural  
15 Uganda. *Malaria journal* 2008;7:49.  
16 73. Clasen T, Naranjo J, Frauchiger D, Gerba C. Laboratory assessment of a gravity-fed  
17 ultrafiltration water treatment device designed for household use in low-income  
18 settings. *The American journal of tropical medicine and hygiene* 2009;80(5):819-23.  
19 74. Lubell Y, Riewpaiboon A, Dondorp AM, von Seidlein L, Mokuolu OA, Nansumba M, et al.  
20 Cost-effectiveness of parenteral artesunate for treating children with severe malaria  
21 in sub-Saharan Africa. *Bull World Health Organ* 2011;89(7):504-12.  
22 75. Tate JE, Rheingans RD, O'Reilly CE, Obonyo B, Burton DC, Tornheim JA, et al. Rotavirus  
23 disease burden and impact and cost-effectiveness of a rotavirus vaccination  
24 program in Kenya. *J Infect Dis* 2009;200 Suppl 1:S76-84.  
25 76. Shillcutt S, Morel C, Goodman C, Coleman P, Bell D, Whitty CJ, et al. Cost-effectiveness of  
26 malaria diagnostic methods in sub-Saharan Africa in an era of combination therapy.  
27 *Bull World Health Organ* 2008;86(2):101-10.  
28  
29  
30  
31  
32  
33  
34  
35  
36  
37  
38  
39  
40  
41  
42  
43  
44  
45  
46  
47  
48  
49  
50  
51  
52  
53  
54  
55  
56  
57  
58  
59  
60

## Figure Legends

**Figure 1.** Cost-effectiveness (Net IPC cost per DALY averted) and Opportunity Index (DALYs per capita) (Campaign 1, n=70)

**Figure 2.** Tornado Graph of Cost per DALY averted –Nigeria: Impact by Input

**Figure 3.** One-way sensitivity analysis of incremental cost-effectiveness by three key variables in 10-country increments ranked by IPC cost-effectiveness.

**Figure 4.** Result of 20,000-trial Monte Carlo simulation: Correlation between input values and cost per DALY averted – Nigeria.

**Tech. Suppl. - Figure 1.** Cost-effectiveness (Net IPC cost per DALY averted) and Opportunity Index (Campaign 2, n=70)

**Tech. Suppl. - Figure 2.** Tornado Graph of Cost per DALY averted – Bangladesh: Impact by Input

**Tech. Suppl. - Figure 3.** Tornado graph of cost per DALY averted – Kenya

**Tech. Suppl. - Figure 4.** Result of 20,000-trial Monte Carlo simulation: Correlation between input values and cost per DALY averted – Bangladesh.

**Tech Suppl. - Figure 5.** Result of 20,000-trial Monte Carlo simulation: Correlation between input values and cost per DALY averted – Kenya.

**Tech Suppl. - Figure 6.** Discounted cumulative net costs, and DALYs averted for two IPC campaigns in Kenya, projected to 30 years, per 1,000 participants.



1  
2  
3  
4  
5  
6  
7  
8  
9  
10  
11  
12  
13  
14  
15  
16  
17  
18  
19  
20  
21  
22  
23  
24  
25  
26  
27  
28  
29  
30  
31  
32  
33  
34  
35  
36  
37  
38  
39  
40  
41  
42  
43  
44  
45  
46  
47  
48  
49  
50  
51  
52  
53  
54  
55  
56  
57  
58  
59  
60

For peer review only

**Table 1. Base case values and sources for data inputs.** Bold figures represent values that change with each country.

|                                                   | <b>Malari<br/>a</b> | <b>Diarrhe<br/>a</b> | <b>HIV</b>      |                     | <b>Source(s)</b>                                                         |                                                        |                                                             |
|---------------------------------------------------|---------------------|----------------------|-----------------|---------------------|--------------------------------------------------------------------------|--------------------------------------------------------|-------------------------------------------------------------|
|                                                   | <b>LLIN</b>         | <b>Filters</b>       | <b>VCT</b>      | <b>Condom<br/>s</b> | <b>LLIN</b>                                                              | <b>Filters</b>                                         | <b>VCT / condoms</b>                                        |
| <b>Health in<sup>61</sup> puts</b>                |                     |                      |                 |                     |                                                                          |                                                        |                                                             |
| Campaign participant per household                | 2.5                 |                      |                 |                     | Post-campaign survey                                                     |                                                        |                                                             |
| Number benefiting per campaign participant        | <b>1.563</b>        | <b>1.840</b>         | 0.950           | 0.361               | Post-campaign survey                                                     |                                                        |                                                             |
| Baseline cases per year per individual benefiting | <b>0.057</b>        | <b>0.542</b>         | 0.004           | 0.009               | [47, 48]                                                                 | [49-51]                                                | [8,62-64] Post-campaign survey (see text)                   |
| Proportion of cases that are fatal                | <b>0.012</b>        | <b>0.001</b>         | 1               | 1                   | [47, 52, 54]                                                             | [48, 49, 51, 59, 62]                                   | Assumption                                                  |
| DALYs incurred with each fatal case               | 28.0                | 28.0                 | 15.1            | 15.1                | [56]                                                                     | [56]                                                   | [56]                                                        |
| DALYs incurred with each non-fatal case           | 0.0037              | 0.0012               | n/a             | n/a                 | [57, 58]                                                                 | [57, 59]                                               | N/a                                                         |
| Protective effect against mortality               | 0.50                | 0.63                 | 0.50            | 0.26                | [65], expert opinion                                                     | [66]                                                   | [67, 68]                                                    |
| Protective effect against non-fatal cases         | 0.5                 | 0.63                 | n/a             | n/a                 | [65]                                                                     | [66]                                                   | N/a                                                         |
| Multiplier to capture secondary benefits          | n/a bit             | n/a                  | 2               | 2                   | [69]                                                                     | N/a                                                    | [70] (see text)                                             |
| Years of benefit                                  | 3                   | 3                    | 1               | 1                   | [71, 72] Adjusted to 3 years per post-campaign evaluation.               | [73] Adjusted to 3 years per post-campaign evaluation. | [68]                                                        |
| Access to care                                    | 0.684               | <b>0.678</b>         | 0.700           | 0.700               | [14-19]                                                                  | [20]                                                   | Assumption                                                  |
| <b>Cost inputs</b>                                |                     |                      |                 |                     |                                                                          |                                                        |                                                             |
| Campaign cost                                     | <b>\$34,280</b>     |                      |                 |                     | [7] \$31,980 plus additional \$2,300 in revised filter maintenance costs |                                                        |                                                             |
| Discount rate                                     | 3.0%                |                      |                 |                     | [10]                                                                     |                                                        |                                                             |
| Health care incurred with                         | <b>\$65</b>         | <b>\$104</b>         | <b>\$12,213</b> | <b>\$12,213</b>     | [64, 74]                                                                 | [75]                                                   | Authors' construction based on 22 years on ART at \$766 per |

1  
2  
3  
4  
5  
6  
7  
8  
9  
10  
11  
12  
13  
14  
15  
16  
17  
18  
19  
20  
21  
22  
23  
24  
25  
26  
27  
28  
29  
30  
31  
32  
33  
34  
35  
36  
37  
38  
39  
40  
41  
42  
43  
44  
45  
46  
47  
48  
49  
50  
51  
52  
53  
54  
55  
56  
57  
58  
59  
60

|                                               |        |        |     |     |      |      |                                         |
|-----------------------------------------------|--------|--------|-----|-----|------|------|-----------------------------------------|
| each fatality                                 |        |        |     |     |      |      | person-year discounted at 3% per annum. |
| Health care incurred with each non-fatal case | \$7.80 | \$7.00 | n/a | n/a | [76] | [75] | N/a                                     |

For peer review only

**Table 2. Sensitivity analysis variables, base case, minimum and maximum values.** All variables have beta distributions with alpha and beta parameters of 2. Minimum and maximum values are 0.5 and 1.5 of base case values, respectively, except for access to diarrhea disease care and malaria care which have minimum and maximums of 0.6 and 1.4, and access to HIV ART which has a minimum and maximum of 0.75 and 1.25. Bold figures represent values that change with each country.

| Input parameter                     | Nigeria      |              |               | Kenya        |              |              | Bangladesh    |               |               |
|-------------------------------------|--------------|--------------|---------------|--------------|--------------|--------------|---------------|---------------|---------------|
|                                     | Base case    | Min          | Max           | Base case    | Min          | Max          | Base case     | Min           | Max           |
| Campaign cost                       | \$40,479     | \$20,239     | \$60,718      | \$34,280     | \$17,140     | \$51,420     | \$35,658      | \$17,829      | \$53,486      |
| Cost per fatality malaria           | \$97.50      | \$48.75      | \$146.25      | \$65.00      | \$32.50      | \$97.50      | \$72.22       | \$36.11       | \$108.33      |
| Cost per fatality diarrhea          | \$156.00     | \$78.00      | \$234.00      | \$104.00     | \$52.00      | \$156.00     | \$115.56      | \$57.78       | \$173.34      |
| Cost per non-fatal case malaria     | \$11.70      | \$5.85       | \$17.55       | \$7.80       | \$3.90       | \$11.70      | \$8.67        | \$4.33        | \$13.00       |
| Cost per non-fatal case diarrhea    | \$10.50      | \$5.25       | \$15.75       | \$7.00       | \$3.50       | \$10.50      | \$7.78        | \$3.89        | \$11.67       |
| Annual cost ART                     | \$938        | \$469        | \$1,407       | \$766        | \$383        | \$1,150      | \$766         | \$383         | \$1,150       |
| Discount rate                       | 0.03         | 0.015        | 0.045         | 0.03         | 0.015        | 0.045        | 0.03          | 0.015         | 0.045         |
| Access to care Diarrhea             | <b>0.565</b> | <b>0.424</b> | <b>0.706</b>  | <b>0.678</b> | <b>0.509</b> | <b>0.848</b> | <b>0.663</b>  | <b>0.497</b>  | <b>0.829</b>  |
| Access to care Malaria              | 0.684        | 0.583        | 0.855         | 0.684        | 0.583        | 0.855        | 0.684         | 0.583         | 0.855         |
| Access to ART                       | 0.7          | 0.42         | 0.98          | 0.7          | 0.42         | 0.98         | 0.7           | 0.42          | 0.98          |
| Years on ART                        | 22           | 11           | 33            | 22           | 11           | 33           | 22            | 11            | 33            |
| HIV prevalence                      | <b>0.036</b> | <b>0.018</b> | <b>0.054</b>  | <b>0.063</b> | <b>0.032</b> | <b>0.095</b> | <b>0.0006</b> | <b>0.0003</b> | <b>0.0009</b> |
| Baseline cases p1000py Malaria      | <b>351.6</b> | <b>175.8</b> | <b>527.5</b>  | <b>57.0</b>  | <b>28.5</b>  | <b>85.5</b>  | <b>6.13</b>   | <b>3.06</b>   | <b>9.19</b>   |
| Baseline cases p1000py Diarrhea     | <b>765.3</b> | <b>382.7</b> | <b>1148.0</b> | <b>542.0</b> | <b>271.0</b> | <b>813.0</b> | <b>299.81</b> | <b>149.91</b> | <b>449.72</b> |
| Propor fatal Malaria                | <b>0.008</b> | <b>0.004</b> | <b>0.012</b>  | <b>0.012</b> | <b>0.006</b> | <b>0.018</b> | <b>0.004</b>  | <b>0.002</b>  | <b>0.006</b>  |
| Propor fatal Diarrhea               | 0.001        | 0.001        | 0.002         | 0.001        | 0.001        | 0.002        | 0.0007        | 0.0004        | 0.0011        |
| Participants per HH                 | 2.5          | 1.25         | 3.75          | 2.5          | 1.25         | 3.75         | 2.5           | 1.25          | 3.75          |
| DALYs fatal malaria                 | 27.8         | 13.9         | 41.7          | 27.8         | 13.9         | 41.7         | 27.8          | 13.9          | 41.7          |
| DALYs fatal diarrhea                | 27.8         | 13.9         | 41.7          | 27.8         | 13.9         | 41.7         | 27.8          | 13.9          | 41.7          |
| DALYs non-fatal malaria             | 0.366        | 0.183        | 0.549         | 0.366        | 0.183        | 0.549        | 0.366         | 0.183         | 0.549         |
| DALYs non-fatal diarrhea            | 0.127        | 0.064        | 0.191         | 0.127        | 0.064        | 0.191        | 0.127         | 0.064         | 0.191         |
| Protect. mortality malaria          | 0.500        | 0.250        | 0.750         | 0.500        | 0.250        | 0.750        | 0.500         | 0.250         | 0.750         |
| Protect. mortality diarrhea         | 0.630        | 0.315        | 0.945         | 0.630        | 0.315        | 0.945        | 0.630         | 0.315         | 0.945         |
| Protect. non fatal malaria          | 0.500        | 0.250        | 0.750         | 0.500        | 0.250        | 0.750        | 0.500         | 0.250         | 0.750         |
| Protect. non fatal diarrhea         | 0.628        | 0.314        | 0.941         | 0.628        | 0.314        | 0.941        | 0.628         | 0.314         | 0.941         |
| Protect. mortality HIV transmission | 0.500        | 0.250        | 0.750         | 0.500        | 0.250        | 0.750        | 0.500         | 0.250         | 0.750         |
| Protect. mortality HIV acquisition  | 0.255        | 0.128        | 0.383         | 0.255        | 0.128        | 0.383        | 0.255         | 0.128         | 0.383         |

1  
2  
3  
4  
5  
6  
7  
8  
9  
10  
11  
12  
13  
14  
15  
16  
17  
18  
19  
20  
21  
22  
23  
24  
25  
26  
27  
28  
29  
30  
31  
32  
33  
34  
35  
36  
37  
38  
39  
40  
41  
42  
43  
44  
45  
46  
47  
48  
49  
50  
51  
52  
53  
54  
55  
56  
57  
58  
59  
60

|                                          |   |     |     |   |     |     |   |     |     |
|------------------------------------------|---|-----|-----|---|-----|-----|---|-----|-----|
| <b>Multiplier: Secondary effects HIV</b> | 2 | 1   | 3   | 2 | 1   | 3   | 2 | 1   | 3   |
| <b>Duration of benefit malaria</b>       | 3 | 1.5 | 4.5 | 3 | 1.5 | 4.5 | 3 | 1.5 | 4.5 |
| <b>Duration of benefit diarrhea</b>      | 3 | 1.5 | 4.5 | 3 | 1.5 | 4.5 | 3 | 1.5 | 4.5 |
| <b>Duration of benefit HIV</b>           | 1 | 0.5 | 1.5 | 1 | 0.5 | 1.5 | 1 | 0.5 | 1.5 |

For peer review only

**Table 3.** Summary costs and cost-effectiveness results per 1,000 IPC participants for 70 countries ordered from most favorable to least favorable cost-effectiveness (net cost per DALY averted). The grey highlighted cells indicate CE ratio is less favorable than investment in ART. Results shown are for the first 3-year campaign.

|    | Country           | World Bank income classification | DALYs per capita | Costs     |           | Disease averted |          | DALYs averted | Cost-effectiveness (CE)        |                           |           |
|----|-------------------|----------------------------------|------------------|-----------|-----------|-----------------|----------|---------------|--------------------------------|---------------------------|-----------|
|    |                   |                                  |                  | IPC cost  | Net cost  | Deaths          | Episodes |               | Campaign cost per DALY averted | Net cost per DALY averted | CE of ART |
| 1  | Guinea-Bissau     | Low                              | 0.134            | \$29,459  | \$7,814   | 40.7            | 10,523   | 1,143.3       | \$26                           | \$7                       | \$1,005   |
| 2  | Senegal           | Lower middle                     | 0.050            | \$34,969  | \$12,190  | 10.7            | 5,735    | 306.0         | \$114                          | \$40                      | \$768     |
| 3  | Sierra Leone      | Low                              | 0.119            | \$31,525  | \$20,112  | 16.0            | 4,118    | 446.7         | \$71                           | \$45                      | \$764     |
| 4  | Burkina Faso      | Low                              | 0.126            | \$31,525  | \$22,206  | 16.4            | 4,124    | 459.4         | \$69                           | \$48                      | \$819     |
| 5  | Somalia           | Low                              | 0.121            | \$26,015  | \$22,754  | 16.8            | 3,682    | 470.5         | \$55                           | \$48                      | \$1,535   |
| 6  | Niger             | Low                              | 0.110            | \$28,081  | \$21,620  | 14.8            | 4,967    | 419.7         | \$67                           | \$52                      | \$1,095   |
| 7  | Mali              | Low                              | 0.124            | \$29,459  | \$23,016  | 15.9            | 4,222    | 445.8         | \$66                           | \$52                      | \$888     |
| 8  | Afghanistan       | Low                              | 0.057            | \$28,770  | \$18,906  | 12.7            | 4,146    | 356.6         | \$81                           | \$53                      | \$935     |
| 9  | Chad              | Low                              | 0.120            | \$35,658  | \$24,848  | 15.3            | 4,335    | 424.6         | \$84                           | \$59                      | \$807     |
| 10 | Lesotho           | Lower middle                     | 0.115            | \$35,658  | \$47,366  | 31.3            | 1,756    | 779.4         | \$46                           | \$61                      | \$738     |
| 11 | Guinea            | Low                              | 0.095            | \$29,459  | \$22,324  | 12.6            | 4,272    | 353.8         | \$83                           | \$63                      | \$928     |
| 12 | Congo, DR         | Low                              | 0.112            | \$24,637  | \$25,488  | 13.4            | 3,517    | 375.9         | \$66                           | \$68                      | \$1,493   |
| 13 | Sudan             | Lower middle                     | 0.057            | \$38,413  | \$15,241  | 6.9             | 4,907    | 198.8         | \$193                          | \$77                      | \$703     |
| 14 | Liberia           | Low                              | 0.092            | \$26,704  | \$25,526  | 11.9            | 3,401    | 332.6         | \$80                           | \$77                      | \$1,025   |
| 15 | Burundi           | Low                              | 0.118            | \$26,015  | \$33,639  | 14.3            | 2,267    | 389.9         | \$67                           | \$86                      | \$987     |
| 16 | Benin             | Low                              | 0.083            | \$33,591  | \$25,345  | 10.0            | 3,096    | 280.0         | \$120                          | \$91                      | \$910     |
| 17 | Côte d'Ivoire     | Lower middle                     | 0.084            | \$33,591  | \$35,069  | 14.1            | 4,021    | 387.2         | \$87                           | \$91                      | \$801     |
| 18 | Nigeria           | Lower middle                     | 0.133            | \$40,479  | \$34,769  | 13.4            | 3,102    | 369.3         | \$110                          | \$94                      | \$747     |
| 19 | Mozambique        | Low                              | 0.141            | \$30,147  | \$59,145  | 22.2            | 3,816    | 590.0         | \$51                           | \$100                     | \$1,109   |
| 20 | Gen. African Rep. | Low                              | 0.105            | \$27,392  | \$37,525  | 13.8            | 2,819    | 373.3         | \$73                           | \$101                     | \$1,230   |
| 21 | Uganda            | Low                              | 0.105            | \$31,525  | \$40,192  | 14.9            | 3,492    | 399.8         | \$79                           | \$101                     | \$749     |
| 22 | Congo, Rep.       | Lower middle                     | 0.067            | \$54,254  | \$33,944  | 11.5            | 2,981    | 318.5         | \$170                          | \$107                     | \$756     |
| 23 | Togo              | Low                              | 0.075            | \$29,459  | \$32,147  | 10.4            | 2,849    | 288.7         | \$102                          | \$111                     | \$864     |
| 24 | Angola            | Upper middle                     | 0.088            | \$64,586  | \$35,794  | 11.5            | 3,268    | 320.8         | \$201                          | \$112                     | \$674     |
| 25 | Tanzania          | Low                              | 0.075            | \$33,591  | \$38,453  | 12.1            | 3,122    | 326.9         | \$103                          | \$118                     | \$935     |
| 26 | Zambia            | Lower middle                     | 0.128            | \$33,591  | \$69,806  | 21.8            | 3,107    | 564.3         | \$60                           | \$124                     | \$826     |
| 27 | Ethiopia          | Low                              | 0.057            | \$30,147  | \$29,630  | 8.6             | 1,986    | 235.7         | \$128                          | \$126                     | \$1,139   |
| 28 | Rwanda            | Low                              | 0.071            | \$31,525  | \$34,034  | 9.6             | 2,216    | 266.1         | \$118                          | \$128                     | \$768     |
| 29 | Malawi            | Low                              | 0.110            | \$28,081  | \$59,745  | 18.3            | 2,965    | 462.2         | \$61                           | \$129                     | \$996     |
| 30 | Cameroon          | Lower middle                     | 0.100            | \$37,724  | \$52,388  | 14.3            | 3,115    | 388.4         | \$97                           | \$135                     | \$741     |
| 31 | Kenya             | Low                              | 0.065            | \$34,280  | \$46,149  | 10.9            | 2,018    | 294.1         | \$117                          | \$157                     | \$883     |
| 32 | Mauritania        | Lower middle                     | 0.042            | \$36,346  | \$28,117  | 5.8             | 2,607    | 164.2         | \$221                          | \$171                     | \$955     |
| 33 | Yemen             | Lower middle                     | 0.025            | \$37,035  | \$21,139  | 4.3             | 3,128    | 122.9         | \$301                          | \$172                     | \$719     |
| 34 | Zimbabwe          | Low                              | 0.075            | \$25,326  | \$76,203  | 17.8            | 1,682    | 428.8         | \$59                           | \$178                     | \$1,731   |
| 35 | Pakistan          | Lower middle                     | 0.020            | \$41,856  | \$19,714  | 3.8             | 2,748    | 108.1         | \$387                          | \$182                     | \$904     |
| 36 | Ghana             | Lower middle                     | 0.063            | \$44,612  | \$35,624  | 6.8             | 1,966    | 189.9         | \$235                          | \$188                     | \$746     |
| 37 | Madagascar        | Low                              | 0.043            | \$28,770  | \$24,895  | 4.5             | 1,910    | 127.8         | \$225                          | \$195                     | \$1,025   |
| 38 | Eritrea           | Low                              | 0.033            | \$27,392  | \$26,438  | 4.3             | 1,942    | 120.5         | \$227                          | \$219                     | \$1,753   |
| 39 | Botswana          | Upper middle                     | 0.080            | \$137,595 | \$185,872 | 26.8            | 1,111    | 734.1         | \$187                          | \$253                     | \$577     |
| 40 | Haiti             | Low                              | 0.028            | \$30,836  | \$31,570  | 4.4             | 3,128    | 123.0         | \$251                          | \$257                     | \$869     |
| 41 | Swaziland         | Lower middle                     | 0.150            | \$58,387  | \$198,392 | 29.1            | 2,230    | 724.2         | \$81                           | \$274                     | \$632     |

|    |    |                    |               |       |           |           |      |       |       |          |          |         |
|----|----|--------------------|---------------|-------|-----------|-----------|------|-------|-------|----------|----------|---------|
| 1  | 42 | Guatemala          | Lower middle  | 0.016 | \$57,698  | \$22,134  | 2.4  | 3,143 | 70.1  | \$823    | \$316    | \$627   |
| 2  | 43 | South Africa       | Upper middle  | 0.097 | \$99,713  | \$180,284 | 21.5 | 1,150 | 561.0 | \$178    | \$321    | \$582   |
| 3  | 44 | Gabon              | Upper middle  | 0.060 | \$29,826  | \$84,306  | 9.3  | 1,876 | 255.0 | \$117    | \$331    | \$613   |
| 4  | 45 | India              | Lower middle  | 0.027 | \$48,744  | \$34,973  | 3.7  | 1,255 | 104.9 | \$464    | \$333    | \$733   |
| 5  | 46 | Myanmar            | Low           | 0.026 | \$31,525  | \$28,249  | 2.9  | 1,306 | 83.7  | \$377    | \$337    | \$1,354 |
| 6  | 47 | Papua New Guinea   | Lower middle  | 0.018 | \$40,479  | \$25,117  | 2.4  | 2,868 | 71.2  | \$568    | \$353    | \$864   |
| 7  | 48 | Iraq               | Upper middle  | 0.009 | \$53,565  | \$25,989  | 1.9  | 2,587 | 55.8  | \$960    | \$466    | \$758   |
| 8  | 49 | Namibia            | Upper middle  | 0.038 | \$75,606  | \$204,271 | 15.6 | 1,528 | 402.7 | \$188    | \$507    | \$606   |
| 9  | 50 | Cambodia           | Low           | 0.014 | \$38,413  | \$31,172  | 1.9  | 1,341 | 54.3  | \$708    | \$574    | \$739   |
| 10 | 51 | Nepal              | Low           | 0.010 | \$30,836  | \$28,994  | 1.4  | 1,135 | 39.8  | \$776    | \$729    | \$883   |
| 11 | 52 | Morocco            | Lower middle  | 0.006 | \$58,387  | \$42,818  | 1.9  | 1,623 | 54.8  | \$1,066  | \$782    | \$650   |
| 12 | 53 | Bangladesh         | Low           | 0.007 | \$35,658  | \$30,236  | 0.9  | 1,076 | 25.9  | \$1,377  | \$1,168  | \$1,046 |
| 13 | 54 | Algeria            | Upper middle  | 0.008 | \$73,540  | \$51,390  | 1.4  | 1,304 | 41.0  | \$1,793  | \$1,253  | \$606   |
| 14 | 55 | Uzbekistan         | Lower middle  | 0.006 | \$45,989  | \$25,637  | 0.6  | 2,352 | 18.2  | \$2,523  | \$1,406  | \$717   |
| 15 | 56 | Ukraine            | Lower middle  | 0.006 | \$74,228  | \$68,364  | 1.2  | 623   | 33.6  | \$2,210  | \$2,036  | \$600   |
| 16 | 57 | Thailand           | Upper middle  | 0.005 | \$90,759  | \$100,377 | 1.8  | 455   | 48.7  | \$1,863  | \$2,061  | \$622   |
| 17 | 58 | Indonesia          | Lower middle  | 0.008 | \$56,321  | \$46,677  | 0.7  | 814   | 20.8  | \$2,708  | \$2,244  | \$793   |
| 18 | 59 | Bolivia            | Lower middle  | 0.010 | \$56,321  | \$30,994  | 0.4  | 2,015 | 13.5  | \$4,178  | \$2,299  | \$668   |
| 19 | 60 | Vietnam            | Lower middle  | 0.005 | \$45,989  | \$40,910  | 0.6  | 828   | 17.6  | \$2,616  | \$2,327  | \$664   |
| 20 | 61 | Colombia           | Upper middle  | 0.003 | \$95,580  | \$63,657  | 0.6  | 1,419 | 20.5  | \$4,652  | \$3,098  | \$598   |
| 21 | 62 | Peru               | Upper middle  | 0.004 | \$95,580  | \$59,439  | 0.6  | 1,497 | 19.0  | \$5,026  | \$3,126  | \$613   |
| 22 | 63 | Brazil             | Upper middle  | 0.004 | \$104,534 | \$65,501  | 0.6  | 1,385 | 19.2  | \$5,431  | \$3,403  | \$581   |
| 23 | 64 | Philippines        | Lower middle  | 0.003 | \$51,499  | \$39,031  | 0.3  | 1,289 | 10.9  | \$4,746  | \$3,597  | \$724   |
| 24 | 65 | Russian Federation | High: nonOECD | 0.007 | \$143,794 | \$121,954 | 1.1  | 735   | 31.2  | \$4,607  | \$3,907  | \$579   |
| 25 | 66 | Argentina          | Upper middle  | 0.003 | \$147,238 | \$101,854 | 0.6  | 1,097 | 18.1  | \$8,155  | \$5,642  | \$577   |
| 26 | 67 | Malaysia           | Upper middle  | 0.004 | \$138,284 | \$104,408 | 0.6  | 930   | 17.6  | \$7,858  | \$5,933  | \$591   |
| 27 | 68 | Turkey             | Upper middle  | 0.001 | \$29,459  | \$58,058  | 0.1  | 1,784 | 6.1   | \$4,821  | \$9,501  | \$582   |
| 28 | 69 | Mexico             | Upper middle  | 0.003 | \$127,264 | \$134,901 | 0.3  | 0     | 9.6   | \$13,197 | \$13,989 | \$583   |
| 29 | 70 | China              | Upper middle  | 0.001 | \$84,560  | \$74,564  | 0.1  | 486   | 4.7   | \$18,015 | \$15,886 | \$638   |

**Table 4.** IPC costs, DALYs averted, and cost-effectiveness compared with no intervention, and incremental cost-effectiveness for 70 countries in increments of 10, ranked by cost-effectiveness. “Net costs” consist of IPC campaign costs adjusted for medical costs averted or added due to the campaign. Results assume 15% of population covered by IPC in each country. Costs in 2012 US\$.

| Countries | Campaign cost | Net cost  |           | DALYs averted |           | Cost-effectiveness (compared with no intervention) |         | Incremental cost-effectiveness (compared with previous row) |          |
|-----------|---------------|-----------|-----------|---------------|-----------|----------------------------------------------------|---------|-------------------------------------------------------------|----------|
|           |               | Camp. 1   | Camp. 2   | Camp. 1       | Camp. 2   | Camp. 1                                            | Camp. 2 | Camp. 1                                                     | Camp. 2  |
| Top 10    | 5.832E+08     | 3.979E+08 | 4.685E+08 | 8.048E+06     | 5.708E+06 | \$49                                               | \$82    | n/a                                                         | n/a      |
| Top 20    | 2.387E+09     | 2.054E+09 | 2.068E+09 | 2.706E+07     | 1.629E+07 | \$76                                               | \$127   | \$87                                                        | \$151    |
| Top 30    | 3.715E+09     | 3.554E+09 | 3.338E+09 | 3.961E+07     | 2.382E+07 | \$90                                               | \$140   | \$119                                                       | \$169    |
| Top 40*   | 5.614E+09     | 4.943E+09 | 4.858E+09 | 4.731E+07     | 2.916E+07 | \$104                                              | \$167   | \$181                                                       | \$284    |
| Top 50*   | 1.624E+10     | 1.342E+10 | 1.395E+10 | 7.265E+07     | 4.983E+07 | \$185                                              | \$280   | \$335                                                       | \$440    |
| Top 60    | 2.226E+10     | 1.863E+10 | 1.941E+10 | 7.573E+07     | 5.186E+07 | \$246                                              | \$374   | \$1,692                                                     | \$2,699  |
| Top 70    | 5.129E+10     | 4.350E+10 | 4.629E+10 | 7.871E+07     | 5.322E+07 | \$553                                              | \$870   | \$8,340                                                     | \$19,728 |



**Table 5.** Median cost-effectiveness (net cost per DALY averted) by 10-country increments in order of cost-effectiveness

| Countries ranked by IPC cost-effectiveness | Campaign 1 | Campaign 2 | Antiretroviral therapy for HIV |
|--------------------------------------------|------------|------------|--------------------------------|
| <b>Top 10</b>                              | \$50       | \$102      | \$854                          |
| <b>11 - 20</b>                             | \$88       | \$141      | \$958                          |
| <b>11 - 30</b>                             | \$121      | \$197      | \$797                          |
| <b>31 - 40</b>                             | \$185      | \$318      | \$894                          |
| <b>41 - 50</b>                             | \$335      | \$591      | \$683                          |
| <b>51 - 60</b>                             | \$1,721    | \$3,514    | \$666                          |
| <b>61 - 70</b>                             | \$4,774    | \$17,068   | \$587                          |

**Table 6.** Multiway sensitivity analysis; 20,000-trial Monte Carlo simulation, 80% confidence interval for 3 IPC outcomes and cost per DALY averted by ART for HIV in Kenya, Bangladesh, and Nigeria.

| <b>Outcomes</b>                                | <b>Kenya</b>       | <b>Bangladesh</b>   | <b>Nigeria</b>     |
|------------------------------------------------|--------------------|---------------------|--------------------|
| DALYs averted                                  | 206 - 407          | 13.1 - 45.8         | 228 - 564          |
| Net costs                                      | \$7,810 - \$79,885 | \$18,566 - \$41,473 | \$2,241 - \$61,448 |
| Net cost per DALY averted (cost-effectiveness) | \$23 - \$304       | \$519 - \$2,547     | \$5 - \$208        |
| Cost per DALY averted by ART for HIV           | \$883              | \$1,046             | \$747              |

For peer review only

## Technical Supplement

### Reduction in risk for malaria and HIV between first and second campaign

In this analysis, to explore sustainability, we examine both an initial campaign and a follow-up campaign three years later. Thus, we need to estimate the health benefit realized by the follow-up campaign, taking into account the stability of disease reduction offered initially. The more that initial protection decays over six years, and thus the larger the disease risk in years 4-6, the greater will be the benefit of a campaign at three years. This decay is a function of the physical durability of the commodities distributed, as well as maintenance of safer behaviors. The dynamics vary by disease.

For malaria we assume 75% as much disease incidence at years 4-6 (absent a 2<sup>nd</sup> campaign) as baseline incidence. In other words, we assume that full set of LLIN distributed in the *initial* campaign, with no follow-up campaign, would have half as much community benefit in years 4-6 as in years 1-3. Many LLIN will remain in place, and the insecticide impregnation itself is stable for close to 10 years. Thus, the 50% incidence drop expected with LLIN in years 1-3 will decrease but not disappear in the second 3 years. However, the second round of LLIN are likely to have a relative effectiveness less than 50%, because the best LLIN users are already protected. Thus we decrease the effectiveness from 50% to 33% (i.e., from 75% of baseline incidence to 50% of baseline incidence). In effect, the 2<sup>nd</sup> campaign is like a booster shot that returns effectiveness to its original level. In sum, the overall benefit of the second campaign is reduced by half -- in first campaign it was 100% of baseline incidence to 50%, and in the second campaign from 75% of baseline incidence to 50%.

We note that these estimates are assembled from isolated data (e.g., LLIN physical durability) combined with a logical framework and best guesses. Nonetheless, we believe that the conclusion – 50% as much benefit for a second campaign – is plausible, and is a far more realistic assumption than full benefit. Our approach is conservative regarding the second campaign – if the specified durability of effect of the LLIN is larger than in reality, we would be *underestimating* the benefit of this campaign. And our estimate of the combined effect of two sequential campaigns is robust. Low estimates of durability understate benefits of the first campaign and overstate benefits of the second campaign, which represent offsetting errors. Conversely, high estimates of durability overstate the value of the first campaign and understate second campaign benefits, again offsetting.

For diarrhea, we assume no filter benefit after three years. The filters are expected to last in good function only three years. Thus, the filter component of the second campaign is just as effective as for the first campaign.

For HIV, effects on DALYs and cost depend heavily on undiagnosed HIV prevalence. The first campaign detects almost all HIV-infected individuals. Thus, the effects of the second campaign depend mainly on the impact of 3 years of HIV incidence on (predominantly undiagnosed) HIV prevalence. This incidence has not been measured, but can be estimated from HIV prevalence using simple epidemic dynamics. <sup>1</sup>Steady-state (pre-ART) annual incidence is about 1/10th of prevalence (slightly more if prevalence above 10%, due to reduction in # of susceptible). So, if initial prevalence was 5%, then annual incidence is about 0.5%, and prevalence at 3 years will be about 1.5%.

Incidence and thus prevalence could be even lower if ART reduces community viral load and also if VCT for HIV+ has substantial behavioral benefits. They could be higher if the first campaign selectively missed HIV+, e.g. they chose not to participate or were away in urban areas.

1  
2  
3  
4  
5  
6  
7  
8  
9 **Diarrhea: estimation of average cases per PY and annual cases**

10 Using data on the number of episodes per year in children under 5<sup>2</sup>, we estimated the average number of episodes  
11 (cases) per person-year in the overall population by weighting the incidence by the percentage of the population  
12 under five<sup>3</sup> and over five. We then adjusted the incidence in the >5 year-old population by the ratio of the country  
13 <5 incidence to the average global <5 incidence<sup>4</sup>. Multiplying each estimate by the total population<sup>5</sup> provided  
14 estimates of the number of cases of diarrhea in each country.

15  
16 **Explanation for difference between results reported in earlier analysis (Kahn, 2012) and current article.** The  
17 earlier evaluation of the Integrated Prevention Campaign in Western Province, Kenya found that the 2008  
18 campaign saved \$16,015 and averted 442 DALYs per 1,000 campaign participants.<sup>6</sup> The current article finds a  
19 highly favorable cost-effectiveness ratio of \$157 per DALY averted (net cost of \$ 46,149 and 294 DALYs averted  
20 per 1,000 campaign participants), but no cost savings in the base-case analysis for Kenya. The difference can be  
21 attributed to the aggregate effect of changes in input parameter values of two types: (a) *Geographic shift from*  
22 *Western Province to Kenya in general.* The earlier analysis calculated the number of beneficiaries per household  
23 based on household size data from the campaign communities, 7.7 persons. In the current article, we used the  
24 lower national figure of 4.6, assumed to reflect fewer children per household<sup>7</sup>. The total benefits of the malaria  
25 and diarrheal disease interventions fell accordingly. The current article also uses lower figures for malaria and  
26 diarrheal annual incidence, 0.057 and 0.542 per individual for Kenya, respectively, versus 0.30 and 1.75 as found in  
27 the 2008 survey in Western Province. (b) *Refined data on care seeking.* The 2012 article assumed 100% care-  
28 seeking for diarrhea and malaria. Subsequently, we obtained data on care-seeking patterns, though not specific to  
29 Kenya. The current article thus assumes 67.8% for diarrheal diseases and 68.4% for malaria. In addition, we  
30 adjusted two cost inputs. The campaign cost was updated to include a recent water filter maintenance program to  
31 \$34,280 from \$32,000 in the earlier paper. Based on a more complete review of the relevant literature including  
32 new findings on life expectancy for people receiving antiretroviral therapy (ART), we also increased the estimated  
33 lifetime cost of ART, from \$5,092 to \$12,213.

**Tech. Suppl. - Table 1:** Summary costs and cost-effectiveness results per 1,000 IPC participants for 70 countries ordered from most to least cost-effective. The grey highlighted cells indicate cost-effectiveness ratios less favorable than investment in ART. Results shown are for the second and subsequent 3-year campaigns.

| Country           | World Bank income classification | DALYs per capita | Costs    |           | Disease averted |          | DALYs averted | Cost-effectiveness (CE)        |                           |           |
|-------------------|----------------------------------|------------------|----------|-----------|-----------------|----------|---------------|--------------------------------|---------------------------|-----------|
|                   |                                  |                  | IPC cost | Net cost  | Deaths          | Episodes |               | Campaign cost per DALY averted | Net cost per DALY averted | CE of ART |
| Guinea-Bissau     | Low                              | 0.134            | \$29,459 | \$16,675  | 26.9            | 5,465.3  | 754.3         | \$22                           | \$39                      | \$1,005   |
| Somalia           | Low                              | 0.121            | \$26,015 | \$23,643  | 11.6            | 2,055.1  | 325.2         | \$73                           | \$80                      | \$768     |
| Afghanistan       | Low                              | 0.057            | \$28,770 | \$22,700  | 12.2            | 2,380.6  | 342.0         | \$66                           | \$84                      | \$764     |
| Congo, DR         | Low                              | 0.112            | \$24,637 | \$24,258  | 9.3             | 1,851.9  | 259.2         | \$94                           | \$95                      | \$819     |
| Niger             | Low                              | 0.110            | \$28,081 | \$24,250  | 10.0            | 2,648.0  | 282.6         | \$86                           | \$99                      | \$1,535   |
| Mali              | Low                              | 0.124            | \$29,459 | \$25,298  | 10.0            | 2,312.1  | 280.1         | \$90                           | \$105                     | \$1,095   |
| Burundi           | Low                              | 0.118            | \$26,015 | \$27,699  | 8.7             | 1,256.5  | 239.8         | \$116                          | \$108                     | \$888     |
| Sierra Leone      | Low                              | 0.119            | \$31,525 | \$24,508  | 9.8             | 2,142.5  | 274.1         | \$89                           | \$115                     | \$935     |
| Mozambique        | Low                              | 0.141            | \$30,147 | \$36,613  | 9.7             | 1,975.5  | 260.0         | \$141                          | \$116                     | \$807     |
| Burkina Faso      | Low                              | 0.126            | \$31,525 | \$26,076  | 9.6             | 2,153.3  | 270.2         | \$96                           | \$117                     | \$738     |
| Chad              | Low                              | 0.120            | \$35,658 | \$27,805  | 10.6            | 2,258.2  | 294.9         | \$94                           | \$121                     | \$928     |
| Lesotho           | Lower middle                     | 0.115            | \$35,658 | \$37,171  | 11.7            | 919.3    | 283.6         | \$131                          | \$126                     | \$1,493   |
| Malawi            | Low                              | 0.110            | \$28,081 | \$36,299  | 8.6             | 1,532.3  | 221.8         | \$164                          | \$127                     | \$703     |
| Zambia            | Lower middle                     | 0.128            | \$33,591 | \$41,222  | 10.1            | 1,660.1  | 263.4         | \$156                          | \$128                     | \$1,025   |
| Liberia           | Low                              | 0.092            | \$26,704 | \$25,199  | 6.8             | 1,762.6  | 190.4         | \$132                          | \$140                     | \$987     |
| Guinea            | Low                              | 0.095            | \$29,459 | \$25,199  | 7.4             | 2,175.8  | 208.8         | \$121                          | \$141                     | \$910     |
| Ken. African Rep. | Low                              | 0.105            | \$27,392 | \$29,606  | 7.1             | 1,443.6  | 194.2         | \$152                          | \$141                     | \$801     |
| Uganda            | Low                              | 0.105            | \$31,525 | \$31,104  | 7.9             | 1,841.7  | 214.8         | \$145                          | \$147                     | \$747     |
| Zimbabwe          | Low                              | 0.075            | \$25,326 | \$40,453  | 6.9             | 905.4    | 165.8         | \$244                          | \$153                     | \$1,109   |
| Côte d'Ivoire     | Lower middle                     | 0.084            | \$33,591 | \$31,110  | 7.8             | 2,009.7  | 214.9         | \$145                          | \$156                     | \$1,230   |
| Ethiopia          | Low                              | 0.057            | \$30,147 | \$28,881  | 6.5             | 1,128.0  | 181.8         | \$159                          | \$166                     | \$749     |
| Cameroon          | Lower middle                     | 0.100            | \$37,724 | \$39,507  | 8.1             | 1,620.0  | 223.1         | \$177                          | \$169                     | \$756     |
| Senegal           | Lower middle                     | 0.050            | \$34,969 | \$22,535  | 6.8             | 2,951.7  | 193.6         | \$116                          | \$181                     | \$864     |
| Togo              | Low                              | 0.075            | \$29,459 | \$28,877  | 5.5             | 1,466.8  | 153.3         | \$188                          | \$192                     | \$674     |
| Rwanda            | Low                              | 0.071            | \$31,525 | \$30,620  | 5.9             | 1,248.9  | 163.9         | \$187                          | \$192                     | \$935     |
| Tanzania          | Low                              | 0.075            | \$33,591 | \$32,273  | 6.1             | 1,636.6  | 167.4         | \$193                          | \$201                     | \$826     |
| Benin             | Low                              | 0.083            | \$33,591 | \$28,793  | 5.9             | 1,611.1  | 167.1         | \$172                          | \$201                     | \$1,139   |
| Swaziland         | Lower middle                     | 0.150            | \$58,387 | \$87,699  | 11.5            | 1,280.6  | 281.0         | \$312                          | \$208                     | \$768     |
| Nigeria           | Lower middle                     | 0.133            | \$40,479 | \$34,860  | 6.7             | 1,610.1  | 187.0         | \$186                          | \$217                     | \$996     |
| Kenya             | Low                              | 0.065            | \$34,280 | \$35,682  | 5.2             | 1,130.6  | 142.8         | \$250                          | \$240                     | \$741     |
| Gabon             | Upper middle                     | 0.060            | \$29,826 | \$46,367  | 4.0             | 972.5    | 110.7         | \$419                          | \$269                     | \$883     |
| Congo, Rep.       | Lower middle                     | 0.067            | \$54,254 | \$42,228  | 7.2             | 1,522.2  | 199.0         | \$212                          | \$273                     | \$955     |
| Angola            | Upper middle                     | 0.088            | \$64,586 | \$44,239  | 8.5             | 1,758.3  | 236.6         | \$187                          | \$273                     | \$719     |
| Sudan             | Lower middle                     | 0.057            | \$38,413 | \$24,940  | 4.8             | 2,620.5  | 136.6         | \$183                          | \$281                     | \$1,731   |
| Mauritania        | Lower middle                     | 0.042            | \$36,346 | \$31,642  | 4.4             | 1,397.4  | 123.1         | \$257                          | \$295                     | \$904     |
| Madagascar        | Low                              | 0.043            | \$28,770 | \$26,424  | 3.0             | 1,079.4  | 84.6          | \$312                          | \$340                     | \$746     |
| Eritrea           | Low                              | 0.033            | \$27,392 | \$26,191  | 2.8             | 1,117.1  | 78.5          | \$334                          | \$349                     | \$1,025   |
| Yemen             | Lower middle                     | 0.025            | \$37,035 | \$27,682  | 3.5             | 1,778.2  | 99.3          | \$279                          | \$373                     | \$1,753   |
| Ghana             | Lower middle                     | 0.063            | \$44,612 | \$38,058  | 4.2             | 1,006.4  | 117.8         | \$323                          | \$379                     | \$577     |
| Haiti             | Low                              | 0.028            | \$30,836 | \$29,010  | 2.8             | 1,789.6  | 80.4          | \$361                          | \$384                     | \$869     |
| Pakistan          | Lower middle                     | 0.020            | \$41,856 | \$28,870  | 3.6             | 1,574.8  | 102.7         | \$281                          | \$407                     | \$632     |
| South Africa      | Upper middle                     | 0.097            | \$99,713 | \$115,007 | 9.1             | 659.2    | 235.9         | \$487                          | \$423                     | \$627     |

IPC CEA Technical Supplement - 3

1  
2  
3  
4  
5  
6  
7  
8  
9  
10  
11  
12  
13  
14  
15  
16  
17  
18  
19  
20  
21  
22  
23  
24  
25  
26  
27  
28  
29  
30  
31  
32  
33  
34  
35  
36  
37  
38  
39  
40  
41  
42  
43  
44  
45  
46  
47  
48  
49  
50  
51  
52  
53  
54  
55  
56  
57  
58  
59  
60

|     |                    |               |       |           |           |     |         |       |          |          |         |
|-----|--------------------|---------------|-------|-----------|-----------|-----|---------|-------|----------|----------|---------|
| 43  | Namibia            | Upper middle  | 0.038 | \$75,606  | \$106,711 | 5.9 | 855.9   | 150.8 | \$708    | \$502    | \$582   |
| 44  | India              | Lower middle  | 0.027 | \$48,744  | \$40,648  | 3.4 | 713.2   | 96.2  | \$422    | \$506    | \$613   |
| 48  | Botswana           | Upper middle  | 0.080 | \$137,595 | \$139,112 | 9.9 | 634.1   | 262.4 | \$530    | \$524    | \$733   |
| 144 | Myanmar            | Low           | 0.026 | \$31,525  | \$29,473  | 1.7 | 672.6   | 48.0  | \$614    | \$657    | \$1,354 |
| 147 | Cambodia           | Low           | 0.014 | \$38,413  | \$33,905  | 1.3 | 758.8   | 37.6  | \$901    | \$1,020  | \$864   |
| 148 | Nepal              | Low           | 0.010 | \$30,836  | \$29,442  | 1.1 | 654.7   | 30.0  | \$982    | \$1,028  | \$758   |
| 149 | Iraq               | Upper middle  | 0.009 | \$53,565  | \$37,274  | 1.7 | 1,493.0 | 50.4  | \$740    | \$1,063  | \$606   |
| 150 | Guatemala          | Lower middle  | 0.016 | \$57,698  | \$35,999  | 1.8 | 1,812.5 | 51.6  | \$698    | \$1,118  | \$739   |
| 151 | Papua New Guinea   | Lower middle  | 0.018 | \$40,479  | \$31,703  | 1.2 | 1,488.7 | 35.8  | \$885    | \$1,130  | \$883   |
| 162 | Bangladesh         | Low           | 0.007 | \$35,658  | \$32,480  | 0.8 | 617.4   | 23.0  | \$1,413  | \$1,551  | \$650   |
| 154 | Morocco            | Lower middle  | 0.006 | \$58,387  | \$49,883  | 1.1 | 898.4   | 31.6  | \$1,577  | \$1,846  | \$1,046 |
| 18  | Algeria            | Upper middle  | 0.008 | \$73,540  | \$60,354  | 1.3 | 752.8   | 38.2  | \$1,580  | \$1,925  | \$606   |
| 55  | Uzbekistan         | Lower middle  | 0.006 | \$45,989  | \$34,086  | 0.5 | 1,357.2 | 14.9  | \$2,282  | \$3,079  | \$717   |
| 56  | Indonesia          | Lower middle  | 0.008 | \$56,321  | \$50,560  | 0.5 | 463.2   | 14.3  | \$3,545  | \$3,949  | \$600   |
| 209 | Thailand           | Upper middle  | 0.005 | \$90,759  | \$90,800  | 0.8 | 261.3   | 21.7  | \$4,177  | \$4,175  | \$622   |
| 251 | Vietnam            | Lower middle  | 0.005 | \$45,989  | \$42,516  | 0.3 | 477.7   | 8.2   | \$5,164  | \$5,586  | \$793   |
| 209 | Philippines        | Lower middle  | 0.003 | \$51,499  | \$44,213  | 0.3 | 743.4   | 8.8   | \$5,026  | \$5,854  | \$668   |
| 209 | Ukraine            | Lower middle  | 0.006 | \$74,228  | \$69,343  | 0.4 | 359.1   | 11.5  | \$6,052  | \$6,479  | \$664   |
| 21  | Bolivia            | Lower middle  | 0.010 | \$56,321  | \$41,435  | 0.2 | 1,162.3 | 8.2   | \$5,044  | \$6,856  | \$598   |
| 262 | Peru               | Upper middle  | 0.004 | \$95,580  | \$73,664  | 0.3 | 862.2   | 9.6   | \$7,650  | \$9,926  | \$613   |
| 25  | Colombia           | Upper middle  | 0.003 | \$95,580  | \$75,850  | 0.3 | 817.2   | 8.8   | \$8,575  | \$10,806 | \$581   |
| 20  | Brazil             | Upper middle  | 0.004 | \$104,534 | \$81,187  | 0.3 | 798.2   | 9.0   | \$9,029  | \$11,626 | \$724   |
| 27  | Russian Federation | High: nonOECD | 0.007 | \$143,794 | \$128,452 | 0.4 | 424.3   | 10.8  | \$11,898 | \$13,319 | \$579   |
| 28  | Malaysia           | Upper middle  | 0.004 | \$138,284 | \$117,395 | 0.2 | 536.0   | 6.6   | \$17,673 | \$20,818 | \$577   |
| 20  | Argentina          | Upper middle  | 0.003 | \$147,238 | \$119,687 | 0.2 | 632.8   | 6.8   | \$17,487 | \$21,512 | \$591   |
| 68  | Turkey             | Upper middle  | 0.001 | \$125,197 | \$86,272  | 0.1 | 1,029.3 | 3.9   | \$22,267 | \$32,314 | \$582   |
| 69  | China              | Upper middle  | 0.001 | \$84,560  | \$78,518  | 0.1 | 280.4   | 2.3   | \$33,785 | \$36,384 | \$583   |
| 37  | Mexico             | Upper middle  | 0.003 | \$127,264 | \$129,804 | 0.1 | 0.1     | 3.2   | \$40,371 | \$39,581 | \$638   |

IPC CEA Technical Supplement - 4

**Tech. Suppl. - Table 2.** Summary costs and cost-effectiveness results per 1,000 IPC participants for 70 countries ordered from highest to lowest opportunity index score reflecting per-capita HIV, TB and malaria disease burden. Grey cells indicate cost-effectiveness ratios less favorable than investment in ART. Results shown are for the first 3-year campaign.

| Country           | World Bank income classification | DALYs per capita | Costs     |           | Disease averted |          | DALYs averted | Cost-effectiveness (CE)        |                           |           |
|-------------------|----------------------------------|------------------|-----------|-----------|-----------------|----------|---------------|--------------------------------|---------------------------|-----------|
|                   |                                  |                  | IPC cost  | Net cost  | Deaths          | Episodes |               | Campaign cost per DALY averted | Net cost per DALY averted | CE of ART |
| Swaziland         | Lower middle                     | 0.150            | \$58,387  | \$198,392 | 29.1            | 2,230    | 724.2         | \$81                           | \$274                     | \$632     |
| Mozambique        | Low                              | 0.141            | \$30,147  | \$59,145  | 22.2            | 3,816    | 590.0         | \$51                           | \$100                     | \$1,109   |
| Guinea-Bissau     | Low                              | 0.134            | \$29,459  | \$7,814   | 40.7            | 10,523   | 1143.3        | \$26                           | \$7                       | \$1,005   |
| Nigeria           | Lower middle                     | 0.133            | \$40,479  | \$34,769  | 13.4            | 3,102    | 369.3         | \$110                          | \$94                      | \$747     |
| Zambia            | Lower middle                     | 0.128            | \$33,591  | \$69,806  | 21.8            | 3,107    | 564.3         | \$60                           | \$124                     | \$826     |
| Burkina Faso      | Low                              | 0.126            | \$31,525  | \$22,206  | 16.4            | 4,124    | 459.4         | \$69                           | \$48                      | \$819     |
| Mali              | Low                              | 0.124            | \$29,459  | \$23,016  | 15.9            | 4,222    | 445.8         | \$66                           | \$52                      | \$888     |
| Somalia           | Low                              | 0.121            | \$26,015  | \$22,754  | 16.8            | 3,682    | 470.5         | \$55                           | \$48                      | \$1,535   |
| Chad              | Low                              | 0.120            | \$35,658  | \$24,848  | 15.3            | 4,335    | 424.6         | \$84                           | \$59                      | \$807     |
| Sierra Leone      | Low                              | 0.119            | \$31,525  | \$20,112  | 16.0            | 4,118    | 446.7         | \$71                           | \$45                      | \$764     |
| Burundi           | Low                              | 0.118            | \$26,015  | \$33,639  | 14.3            | 2,267    | 389.9         | \$67                           | \$86                      | \$987     |
| Lesotho           | Lower middle                     | 0.115            | \$35,658  | \$47,366  | 31.3            | 1,756    | 779.4         | \$46                           | \$61                      | \$738     |
| Congo, DR         | Low                              | 0.112            | \$24,637  | \$25,488  | 13.4            | 3,517    | 375.9         | \$66                           | \$68                      | \$1,493   |
| Niger             | Low                              | 0.110            | \$28,081  | \$21,620  | 14.8            | 4,967    | 419.7         | \$67                           | \$52                      | \$1,095   |
| Malawi            | Low                              | 0.110            | \$28,081  | \$59,745  | 18.3            | 2,965    | 462.2         | \$61                           | \$129                     | \$996     |
| Ken. African Rep. | Low                              | 0.105            | \$27,392  | \$37,525  | 13.8            | 2,819    | 373.3         | \$73                           | \$101                     | \$1,230   |
| Uganda            | Low                              | 0.105            | \$31,525  | \$40,192  | 14.9            | 3,492    | 399.8         | \$79                           | \$101                     | \$749     |
| Cameroon          | Lower middle                     | 0.100            | \$37,724  | \$52,388  | 14.3            | 3,115    | 388.4         | \$97                           | \$135                     | \$741     |
| South Africa      | Upper middle                     | 0.097            | \$99,713  | \$180,284 | 21.5            | 1,150    | 561.0         | \$178                          | \$321                     | \$582     |
| Guinea            | Low                              | 0.095            | \$29,459  | \$22,324  | 12.6            | 4,272    | 353.8         | \$83                           | \$63                      | \$928     |
| Liberia           | Low                              | 0.092            | \$26,704  | \$25,526  | 11.9            | 3,401    | 332.6         | \$80                           | \$77                      | \$1,025   |
| Angola            | Upper middle                     | 0.088            | \$64,586  | \$35,794  | 11.5            | 3,268    | 320.8         | \$201                          | \$112                     | \$674     |
| Côte d'Ivoire     | Lower middle                     | 0.084            | \$33,591  | \$35,069  | 14.1            | 4,021    | 387.2         | \$87                           | \$91                      | \$801     |
| Benin             | Low                              | 0.083            | \$33,591  | \$25,345  | 10.0            | 3,096    | 280.0         | \$120                          | \$91                      | \$910     |
| Botswana          | Upper middle                     | 0.080            | \$137,595 | \$185,872 | 26.8            | 1,111    | 734.1         | \$187                          | \$253                     | \$577     |
| Zimbabwe          | Low                              | 0.075            | \$25,326  | \$76,203  | 17.8            | 1,682    | 428.8         | \$59                           | \$178                     | \$1,731   |
| Tanzania          | Low                              | 0.075            | \$33,591  | \$38,453  | 12.1            | 3,122    | 326.9         | \$103                          | \$118                     | \$935     |
| Togo              | Low                              | 0.075            | \$29,459  | \$32,147  | 10.4            | 2,849    | 288.7         | \$102                          | \$111                     | \$864     |
| Rwanda            | Low                              | 0.071            | \$31,525  | \$34,034  | 9.6             | 2,216    | 266.1         | \$118                          | \$128                     | \$768     |
| Congo, Rep.       | Lower middle                     | 0.067            | \$54,254  | \$33,944  | 11.5            | 2,981    | 318.5         | \$170                          | \$107                     | \$756     |
| Kenya             | Low                              | 0.065            | \$34,280  | \$46,149  | 10.9            | 2,018    | 294.1         | \$117                          | \$157                     | \$883     |
| Ghana             | Lower middle                     | 0.063            | \$44,612  | \$35,624  | 6.8             | 1,966    | 189.9         | \$235                          | \$188                     | \$746     |
| Gabon             | Upper middle                     | 0.060            | \$29,826  | \$84,306  | 9.3             | 1,876    | 255.0         | \$117                          | \$331                     | \$613     |
| Ethiopia          | Low                              | 0.057            | \$30,147  | \$29,630  | 8.6             | 1,986    | 235.7         | \$128                          | \$126                     | \$1,139   |
| Sudan             | Lower middle                     | 0.057            | \$38,413  | \$15,241  | 6.9             | 4,907    | 198.8         | \$193                          | \$77                      | \$703     |
| Afghanistan       | Low                              | 0.057            | \$28,770  | \$18,906  | 12.7            | 4,146    | 356.6         | \$81                           | \$53                      | \$935     |

IPC CEA Technical Supplement - 5

1  
2  
3  
4  
5  
6  
7  
8  
9  
10  
11  
12  
13  
14  
15  
16  
17  
18  
19  
20  
21  
22  
23  
24  
25  
26  
27  
28  
29  
30  
31  
32  
33  
34  
35  
36  
37  
38  
39  
40  
41  
42  
43  
44  
45  
46  
47  
48  
49  
50  
51  
52  
53  
54  
55  
56  
57  
58  
59  
60

|    |                    |               |       |           |           |      |       |       |          |          |         |
|----|--------------------|---------------|-------|-----------|-----------|------|-------|-------|----------|----------|---------|
| 37 | Senegal            | Lower middle  | 0.050 | \$34,969  | \$12,190  | 10.7 | 5,735 | 306.0 | \$114    | \$40     | \$768   |
| 38 | Madagascar         | Low           | 0.043 | \$28,770  | \$24,895  | 4.5  | 1,910 | 127.8 | \$225    | \$195    | \$1,025 |
| 39 | Mauritania         | Lower middle  | 0.042 | \$36,346  | \$28,117  | 5.8  | 2,607 | 164.2 | \$221    | \$171    | \$955   |
| 40 | Namibia            | Upper middle  | 0.038 | \$75,606  | \$204,271 | 15.6 | 1,528 | 402.7 | \$188    | \$507    | \$606   |
| 41 | Eritrea            | Low           | 0.033 | \$27,392  | \$26,438  | 4.3  | 1,942 | 120.5 | \$227    | \$219    | \$1,753 |
| 42 | Haiti              | Low           | 0.028 | \$30,836  | \$31,570  | 4.4  | 3,128 | 123.0 | \$251    | \$257    | \$869   |
| 43 | India              | Lower middle  | 0.027 | \$48,744  | \$34,973  | 3.7  | 1,255 | 104.9 | \$464    | \$333    | \$733   |
| 44 | Myanmar            | Low           | 0.026 | \$31,525  | \$28,249  | 2.9  | 1,306 | 83.7  | \$377    | \$337    | \$1,354 |
| 45 | Yemen              | Lower middle  | 0.025 | \$37,035  | \$21,139  | 4.3  | 3,128 | 122.9 | \$301    | \$172    | \$719   |
| 46 | Pakistan           | Lower middle  | 0.020 | \$41,856  | \$19,714  | 3.8  | 2,748 | 108.1 | \$387    | \$182    | \$904   |
| 47 | Papua New Guinea   | Lower middle  | 0.018 | \$40,479  | \$25,117  | 2.4  | 2,868 | 71.2  | \$568    | \$353    | \$864   |
| 48 | Guatemala          | Lower middle  | 0.016 | \$57,698  | \$22,134  | 2.4  | 3,143 | 70.1  | \$823    | \$316    | \$627   |
| 49 | Cambodia           | Low           | 0.014 | \$38,413  | \$31,172  | 1.9  | 1,341 | 54.3  | \$708    | \$574    | \$739   |
| 50 | Nepal              | Low           | 0.010 | \$30,836  | \$28,994  | 1.4  | 1,135 | 39.8  | \$776    | \$729    | \$883   |
| 51 | Bolivia            | Lower middle  | 0.010 | \$56,321  | \$30,994  | 0.4  | 2,015 | 13.5  | \$4,178  | \$2,299  | \$668   |
| 52 | Iraq               | Upper middle  | 0.009 | \$53,565  | \$25,989  | 1.9  | 2,587 | 55.8  | \$960    | \$466    | \$758   |
| 53 | Algeria            | Upper middle  | 0.008 | \$73,540  | \$51,390  | 1.4  | 1,304 | 41.0  | \$1,793  | \$1,253  | \$606   |
| 54 | Indonesia          | Lower middle  | 0.008 | \$56,321  | \$46,677  | 0.7  | 814   | 20.8  | \$2,708  | \$2,244  | \$793   |
| 55 | Bangladesh         | Low           | 0.007 | \$35,658  | \$30,236  | 0.9  | 1,076 | 25.9  | \$1,377  | \$1,168  | \$1,046 |
| 56 | Russian Federation | High: nonOECD | 0.007 | \$143,794 | \$121,954 | 1.1  | 735   | 31.2  | \$4,607  | \$3,907  | \$579   |
| 57 | Uzbekistan         | Lower middle  | 0.006 | \$45,989  | \$25,637  | 0.6  | 2,352 | 18.2  | \$2,523  | \$1,406  | \$717   |
| 58 | Morocco            | Lower middle  | 0.006 | \$58,387  | \$42,818  | 1.9  | 1,623 | 54.8  | \$1,066  | \$782    | \$650   |
| 59 | Ukraine            | Lower middle  | 0.006 | \$74,228  | \$68,364  | 1.2  | 623   | 33.6  | \$2,210  | \$2,036  | \$600   |
| 60 | Thailand           | Upper middle  | 0.005 | \$90,759  | \$100,377 | 1.8  | 455   | 48.7  | \$1,863  | \$2,061  | \$622   |
| 61 | Vietnam            | Lower middle  | 0.005 | \$45,989  | \$40,910  | 0.6  | 828   | 17.6  | \$2,616  | \$2,327  | \$664   |
| 62 | Malaysia           | Upper middle  | 0.004 | \$138,284 | \$104,408 | 0.6  | 930   | 17.6  | \$7,858  | \$5,933  | \$591   |
| 63 | Brazil             | Upper middle  | 0.004 | \$104,534 | \$65,501  | 0.6  | 1,385 | 19.2  | \$5,431  | \$3,403  | \$581   |
| 64 | Peru               | Upper middle  | 0.004 | \$95,580  | \$59,439  | 0.6  | 1,497 | 19.0  | \$5,026  | \$3,126  | \$613   |
| 65 | Colombia           | Upper middle  | 0.003 | \$95,580  | \$63,657  | 0.6  | 1,419 | 20.5  | \$4,652  | \$3,098  | \$598   |
| 66 | Mexico             | Upper middle  | 0.003 | \$127,264 | \$134,901 | 0.3  | 0     | 9.6   | \$13,197 | \$13,989 | \$583   |
| 67 | Philippines        | Lower middle  | 0.003 | \$51,499  | \$39,031  | 0.3  | 1,289 | 10.9  | \$4,746  | \$3,597  | \$724   |
| 68 | Argentina          | Upper middle  | 0.003 | \$147,238 | \$101,854 | 0.6  | 1,097 | 18.1  | \$8,155  | \$5,642  | \$577   |
| 69 | China              | Upper middle  | 0.001 | \$84,560  | \$74,564  | 0.1  | 486   | 4.7   | \$18,015 | \$15,886 | \$638   |
| 70 | Turkey             | Upper middle  | 0.001 | \$125,197 | \$58,058  | 0.1  | 1,784 | 6.1   | \$20,489 | \$9,501  | \$582   |



**Tech. Suppl. - Table 3.** Summary costs and cost-effectiveness results per 1,000 IPC participants for 70 countries ordered from highest to lowest opportunity index score reflecting per-capita HIV, TB and malaria disease burden. Grey highlighted cells indicate cost-effectiveness ratios less favorable than investment in ART Results shown are for the second and subsequent 3-year campaigns.

|    | Country | World Bank income classification | DALYs per capita | Costs    |           | Disease averted |          | DALYs averted | Cost-effectiveness (CE)        |                           |           |         |
|----|---------|----------------------------------|------------------|----------|-----------|-----------------|----------|---------------|--------------------------------|---------------------------|-----------|---------|
|    |         |                                  |                  | IPC cost | Net cost  | Deaths          | Episodes |               | Campaign cost per DALY averted | Net cost per DALY averted | CE of ART |         |
| 1  |         |                                  |                  |          |           |                 |          |               |                                |                           |           |         |
| 2  |         |                                  |                  |          |           |                 |          |               |                                |                           |           |         |
| 3  |         |                                  |                  |          |           |                 |          |               |                                |                           |           |         |
| 4  |         |                                  |                  |          |           |                 |          |               |                                |                           |           |         |
| 5  |         |                                  |                  |          |           |                 |          |               |                                |                           |           |         |
| 6  |         |                                  |                  |          |           |                 |          |               |                                |                           |           |         |
| 7  |         |                                  |                  |          |           |                 |          |               |                                |                           |           |         |
| 8  |         |                                  |                  |          |           |                 |          |               |                                |                           |           |         |
| 9  |         |                                  |                  |          |           |                 |          |               |                                |                           |           |         |
| 10 |         |                                  |                  |          |           |                 |          |               |                                |                           |           |         |
| 11 |         |                                  |                  |          |           |                 |          |               |                                |                           |           |         |
| 12 |         |                                  |                  |          |           |                 |          |               |                                |                           |           |         |
| 13 |         |                                  |                  |          |           |                 |          |               |                                |                           |           |         |
| 14 |         |                                  |                  |          |           |                 |          |               |                                |                           |           |         |
| 15 |         |                                  |                  |          |           |                 |          |               |                                |                           |           |         |
| 16 |         |                                  |                  |          |           |                 |          |               |                                |                           |           |         |
| 17 | 1       | Swaziland                        | Lower middle     | 0.150    | \$58,387  | \$87,699        | 11.5     | 1,281         | 281.0                          | \$312                     | \$208     | \$632   |
| 18 | 2       | Mozambique                       | Low              | 0.141    | \$30,147  | \$36,613        | 9.7      | 1,976         | 260.0                          | \$141                     | \$116     | \$1,109 |
| 19 | 3       | Guinea-Bissau                    | Low              | 0.134    | \$29,459  | \$16,675        | 26.9     | 5,465         | 754.3                          | \$22                      | \$39      | \$1,005 |
| 20 | 4       | Nigeria                          | Lower middle     | 0.133    | \$40,479  | \$34,860        | 6.7      | 1,610         | 187.0                          | \$186                     | \$217     | \$747   |
| 21 | 5       | Zambia                           | Lower middle     | 0.128    | \$33,591  | \$41,222        | 10.1     | 1,660         | 263.4                          | \$156                     | \$128     | \$826   |
| 22 | 6       | Burkina Faso                     | Low              | 0.126    | \$31,525  | \$26,076        | 9.6      | 2,153         | 270.2                          | \$96                      | \$117     | \$819   |
| 23 | 7       | Mali                             | Low              | 0.124    | \$29,459  | \$25,298        | 10.0     | 2,312         | 280.1                          | \$90                      | \$105     | \$888   |
| 24 | 8       | Somalia                          | Low              | 0.121    | \$26,015  | \$23,643        | 11.6     | 2,055         | 325.2                          | \$73                      | \$80      | \$1,535 |
| 25 | 9       | Chad                             | Low              | 0.120    | \$35,658  | \$27,805        | 10.6     | 2,258         | 294.9                          | \$94                      | \$121     | \$807   |
| 26 | 10      | Sierra Leone                     | Low              | 0.119    | \$31,525  | \$24,508        | 9.8      | 2,143         | 274.1                          | \$89                      | \$115     | \$764   |
| 27 | 11      | Burundi                          | Low              | 0.118    | \$26,015  | \$27,699        | 8.7      | 1,256         | 239.8                          | \$116                     | \$108     | \$987   |
| 28 | 12      | Lesotho                          | Lower middle     | 0.115    | \$35,658  | \$37,171        | 11.7     | 919           | 283.6                          | \$131                     | \$126     | \$738   |
| 29 | 13      | Congo, DR                        | Low              | 0.112    | \$24,637  | \$24,258        | 9.3      | 1,852         | 259.2                          | \$94                      | \$95      | \$1,493 |
| 30 | 14      | Niger                            | Low              | 0.110    | \$28,081  | \$24,250        | 10.0     | 2,648         | 282.6                          | \$86                      | \$99      | \$1,095 |
| 31 | 15      | Malawi                           | Low              | 0.110    | \$28,081  | \$36,299        | 8.6      | 1,532         | 221.8                          | \$164                     | \$127     | \$996   |
| 32 | 16      | Ken. African Rep.                | Low              | 0.105    | \$27,392  | \$29,606        | 7.1      | 1,444         | 194.2                          | \$152                     | \$141     | \$1,230 |
| 33 | 17      | Uganda                           | Low              | 0.105    | \$31,525  | \$31,104        | 7.9      | 1,842         | 214.8                          | \$145                     | \$147     | \$749   |
| 34 | 18      | Cameroon                         | Lower middle     | 0.100    | \$37,724  | \$39,507        | 8.1      | 1,620         | 223.1                          | \$177                     | \$169     | \$741   |
| 35 | 19      | South Africa                     | Upper middle     | 0.097    | \$99,713  | \$115,007       | 9.1      | 659           | 235.9                          | \$487                     | \$423     | \$582   |
| 36 | 20      | Guinea                           | Low              | 0.095    | \$29,459  | \$25,199        | 7.4      | 2,176         | 208.8                          | \$121                     | \$141     | \$928   |
| 37 | 21      | Liberia                          | Low              | 0.092    | \$26,704  | \$25,199        | 6.8      | 1,763         | 190.4                          | \$132                     | \$140     | \$1,025 |
| 38 | 22      | Angola                           | Upper middle     | 0.088    | \$64,586  | \$44,239        | 8.5      | 1,758         | 236.6                          | \$187                     | \$273     | \$674   |
| 39 | 23      | Côte d'Ivoire                    | Lower middle     | 0.084    | \$33,591  | \$31,110        | 7.8      | 2,010         | 214.9                          | \$145                     | \$156     | \$801   |
| 40 | 24      | Benin                            | Low              | 0.083    | \$33,591  | \$28,793        | 5.9      | 1,611         | 167.1                          | \$172                     | \$201     | \$910   |
| 41 | 25      | Botswana                         | Upper middle     | 0.080    | \$137,595 | \$139,112       | 9.9      | 634           | 262.4                          | \$530                     | \$524     | \$577   |
| 42 | 26      | Zimbabwe                         | Low              | 0.075    | \$25,326  | \$40,453        | 6.9      | 905           | 165.8                          | \$244                     | \$153     | \$1,731 |
| 43 | 27      | Tanzania                         | Low              | 0.075    | \$33,591  | \$32,273        | 6.1      | 1,637         | 167.4                          | \$193                     | \$201     | \$935   |
| 44 | 28      | Togo                             | Low              | 0.075    | \$29,459  | \$28,877        | 5.5      | 1,467         | 153.3                          | \$188                     | \$192     | \$864   |
| 45 | 29      | Rwanda                           | Low              | 0.071    | \$31,525  | \$30,620        | 5.9      | 1,249         | 163.9                          | \$187                     | \$192     | \$768   |
| 46 | 30      | Congo, Rep.                      | Lower middle     | 0.067    | \$54,254  | \$42,228        | 7.2      | 1,522         | 199.0                          | \$212                     | \$273     | \$756   |
| 47 | 31      | Kenya                            | Low              | 0.065    | \$34,280  | \$35,682        | 5.2      | 1,131         | 142.8                          | \$250                     | \$240     | \$883   |
| 48 | 32      | Ghana                            | Lower middle     | 0.063    | \$44,612  | \$38,058        | 4.2      | 1,006         | 117.8                          | \$323                     | \$379     | \$746   |
| 49 | 33      | Gabon                            | Upper middle     | 0.060    | \$29,826  | \$46,367        | 4.0      | 972           | 110.7                          | \$419                     | \$269     | \$613   |

IPC CEA Technical Supplement - 7

1  
2  
3  
4  
5  
6  
7  
8  
9  
10  
11  
12  
13  
14  
15  
16  
17  
18  
19  
20  
21  
22  
23  
24  
25  
26  
27  
28  
29  
30  
31  
32  
33  
34  
35  
36  
37  
38  
39  
40  
41  
42  
43  
44  
45  
46  
47  
48  
49  
50  
51  
52  
53  
54  
55  
56  
57  
58  
59  
60

|    |                    |               |       |           |           |      |       |       |          |          |         |
|----|--------------------|---------------|-------|-----------|-----------|------|-------|-------|----------|----------|---------|
| 34 | Ethiopia           | Low           | 0.057 | \$30,147  | \$28,881  | 6.5  | 1,128 | 181.8 | \$159    | \$166    | \$1,139 |
| 35 | Sudan              | Lower middle  | 0.057 | \$38,413  | \$24,940  | 4.8  | 2,620 | 136.6 | \$183    | \$281    | \$703   |
| 36 | Afghanistan        | Low           | 0.057 | \$28,770  | \$22,700  | 12.2 | 2,381 | 342.0 | \$66     | \$84     | \$935   |
| 37 | Senegal            | Lower middle  | 0.050 | \$34,969  | \$22,535  | 6.8  | 2,952 | 193.6 | \$116    | \$181    | \$768   |
| 38 | Madagascar         | Low           | 0.043 | \$28,770  | \$26,424  | 3.0  | 1,079 | 84.6  | \$312    | \$340    | \$1,025 |
| 39 | Mauritania         | Lower middle  | 0.042 | \$36,346  | \$31,642  | 4.4  | 1,397 | 123.1 | \$257    | \$295    | \$955   |
| 40 | Namibia            | Upper middle  | 0.038 | \$75,606  | \$106,711 | 5.9  | 856   | 150.8 | \$708    | \$502    | \$606   |
| 41 | Eritrea            | Low           | 0.033 | \$27,392  | \$26,191  | 2.8  | 1,117 | 78.5  | \$334    | \$349    | \$1,753 |
| 42 | Haiti              | Low           | 0.028 | \$30,836  | \$29,010  | 2.8  | 1,790 | 80.4  | \$361    | \$384    | \$869   |
| 43 | India              | Lower middle  | 0.027 | \$48,744  | \$40,648  | 3.4  | 713   | 96.2  | \$422    | \$506    | \$733   |
| 44 | Myanmar            | Low           | 0.026 | \$31,525  | \$29,473  | 1.7  | 673   | 48.0  | \$614    | \$657    | \$1,354 |
| 45 | Yemen              | Lower middle  | 0.025 | \$37,035  | \$27,682  | 3.5  | 1,778 | 99.3  | \$279    | \$373    | \$719   |
| 46 | Pakistan           | Lower middle  | 0.020 | \$41,856  | \$28,870  | 3.6  | 1,575 | 102.7 | \$281    | \$407    | \$904   |
| 47 | Papua New Guinea   | Lower middle  | 0.018 | \$40,479  | \$31,703  | 1.2  | 1,489 | 35.8  | \$885    | \$1,130  | \$864   |
| 48 | Guatemala          | Lower middle  | 0.016 | \$57,698  | \$35,999  | 1.8  | 1,813 | 51.6  | \$698    | \$1,118  | \$627   |
| 49 | Cambodia           | Low           | 0.014 | \$38,413  | \$33,905  | 1.3  | 759   | 37.6  | \$901    | \$1,020  | \$739   |
| 50 | Nepal              | Low           | 0.010 | \$30,836  | \$29,442  | 1.1  | 655   | 30.0  | \$982    | \$1,028  | \$883   |
| 51 | Bolivia            | Lower middle  | 0.010 | \$56,321  | \$41,435  | 0.2  | 1,162 | 8.2   | \$5,044  | \$6,856  | \$668   |
| 52 | Iraq               | Upper middle  | 0.009 | \$53,565  | \$37,274  | 1.7  | 1,493 | 50.4  | \$740    | \$1,063  | \$758   |
| 53 | Algeria            | Upper middle  | 0.008 | \$73,540  | \$60,354  | 1.3  | 753   | 38.2  | \$1,580  | \$1,925  | \$606   |
| 54 | Indonesia          | Lower middle  | 0.008 | \$56,321  | \$50,560  | 0.5  | 463   | 14.3  | \$3,545  | \$3,949  | \$793   |
| 55 | Bangladesh         | Low           | 0.007 | \$35,658  | \$32,480  | 0.8  | 617   | 23.0  | \$1,413  | \$1,551  | \$1,046 |
| 56 | Russian Federation | High: nonOECD | 0.007 | \$143,794 | \$128,452 | 0.4  | 424   | 10.8  | \$11,898 | \$13,319 | \$579   |
| 57 | Uzbekistan         | Lower middle  | 0.006 | \$45,989  | \$34,086  | 0.5  | 1,357 | 14.9  | \$2,282  | \$3,079  | \$717   |
| 58 | Morocco            | Lower middle  | 0.006 | \$58,387  | \$49,883  | 1.1  | 898   | 31.6  | \$1,577  | \$1,846  | \$650   |
| 59 | Ukraine            | Lower middle  | 0.006 | \$74,228  | \$69,343  | 0.4  | 359   | 11.5  | \$6,052  | \$6,479  | \$600   |
| 60 | Thailand           | Upper middle  | 0.005 | \$90,759  | \$90,800  | 0.8  | 261   | 21.7  | \$4,177  | \$4,175  | \$622   |
| 61 | Vietnam            | Lower middle  | 0.005 | \$45,989  | \$42,516  | 0.3  | 478   | 8.2   | \$5,164  | \$5,586  | \$664   |
| 62 | Malaysia           | Upper middle  | 0.004 | \$138,284 | \$117,395 | 0.2  | 536   | 6.6   | \$17,673 | \$20,818 | \$591   |
| 63 | Brazil             | Upper middle  | 0.004 | \$104,534 | \$81,187  | 0.3  | 798   | 9.0   | \$9,029  | \$11,626 | \$581   |
| 64 | Peru               | Upper middle  | 0.004 | \$95,580  | \$73,664  | 0.3  | 862   | 9.6   | \$7,650  | \$9,926  | \$613   |
| 65 | Colombia           | Upper middle  | 0.003 | \$95,580  | \$75,850  | 0.3  | 817   | 8.8   | \$8,575  | \$10,806 | \$598   |
| 66 | Mexico             | Upper middle  | 0.003 | \$127,264 | \$129,804 | 0.1  | 0     | 3.2   | \$40,371 | \$39,581 | \$583   |
| 67 | Philippines        | Lower middle  | 0.003 | \$51,499  | \$44,213  | 0.3  | 743   | 8.8   | \$5,026  | \$5,854  | \$724   |
| 68 | Argentina          | Upper middle  | 0.003 | \$147,238 | \$119,687 | 0.2  | 633   | 6.8   | \$17,487 | \$21,512 | \$577   |
| 69 | China              | Upper middle  | 0.001 | \$84,560  | \$78,518  | 0.1  | 280   | 2.3   | \$33,785 | \$36,384 | \$638   |
| 70 | Turkey             | Upper middle  | 0.001 | \$125,197 | \$86,272  | 0.1  | 1,029 | 3.9   | \$22,267 | \$32,314 | \$582   |

IPC CEA Technical Supplement - 8

**Tech. Suppl. - Table 4.** Relative contribution of diarrhoea, malaria and HIV to disease burden of each of 70 countries.

| Country           | Total DALY burden (3 diseases) | Population    | DALYs per capita | Diarrhoea        |            | Malaria        |            | HIV        |           |
|-------------------|--------------------------------|---------------|------------------|------------------|------------|----------------|------------|------------|-----------|
|                   |                                |               |                  | Diarrhoea burden | DALYs      | Malaria burden | DALYs      | HIV burden | DALYs     |
| Swaziland         | 158,061                        | 1,055,506     | 0.1497           | 8.4              | 16,523     | 0.03           | 4,338      | 25.9       | 137,200   |
| Mozambique        | 3,288,897                      | 23,390,765    | 0.1406           | 11.9             | 532,817    | 12.49          | 1,482,080  | 11.5       | 1,274,000 |
| Guinea-Bissau     | 203,103                        | 1,515,224     | 0.1340           | 19.1             | 78,434     | 17.65          | 104,089    | 2.5        | 20,580    |
| Nigeria           | 21,145,996                     | 158,423,182   | 0.1335           | 18.7             | 4,995,101  | 20.19          | 12,818,894 | 3.6        | 3,332,000 |
| Zambia            | 1,654,717                      | 12,926,409    | 0.1280           | 14.6             | 410,637    | 15.24          | 499,280    | 13.5       | 744,800   |
| Burkina Faso      | 2,079,356                      | 16,468,714    | 0.1263           | 18.9             | 659,064    | 20.39          | 1,353,652  | 1.2        | 66,640    |
| Mali              | 1,905,686                      | 15,369,809    | 0.1240           | 19.2             | 715,293    | 20.83          | 1,145,312  | 1          | 45,080    |
| Somalia           | 1,131,667                      | 9,330,872     | 0.1213           | 21.8             | 534,781    | 5.85           | 512,605    | 0.7        | 84,280    |
| Chad              | 1,341,959                      | 11,227,208    | 0.1195           | 21.9             | 652,646    | 18.59          | 400,213    | 3.4        | 289,100   |
| Sierra Leone      | 698,366                        | 5,867,536     | 0.1190           | 20.9             | 246,659    | 12.94          | 405,647    | 1.6        | 46,060    |
| Burundi           | 991,869                        | 8,382,849     | 0.1183           | 23.6             | 393,025    | 9.25           | 461,645    | 3.3        | 137,200   |
| Lesotho           | 250,467                        | 2,171,318     | 0.1154           | 9.9              | 25,067     | 0.00           | Unknown    | 23.6       | 225,400   |
| Congo, DR         | 7,371,699                      | 65,965,795    | 0.1118           | 18.5             | 3,414,271  | 17.02          | 3,389,027  | 1.3        | 568,400   |
| Niger             | 1,711,372                      | 15,511,953    | 0.1103           | 20.3             | 744,317    | 17.95          | 907,275    | 0.8        | 59,780    |
| Malawi            | 1,632,385                      | 14,900,841    | 0.1095           | 10.9             | 431,392    | 16.64          | 485,593    | 11         | 715,400   |
| Ken. African Rep. | 463,590                        | 4,401,051     | 0.1053           | 17.3             | 140,555    | 14.32          | 272,074    | 4.7        | 50,960    |
| Uganda            | 3,513,177                      | 33,424,683    | 0.1051           | 16.0             | 1,078,814  | 22.40          | 1,258,363  | 6.5        | 1,176,000 |
| Cameroon          | 1,957,804                      | 19,598,889    | 0.0999           | 16.2             | 683,514    | 19.05          | 705,891    | 5.3        | 568,400   |
| South Africa      | 4,851,895                      | 49,991,300    | 0.0971           | 8.7              | 1,010,490  | 0.07           | 19,404     | 17.8       | 3,822,000 |
| Guinea            | 950,891                        | 9,981,590     | 0.0953           | 13.8             | 305,921    | 23.62          | 584,210    | 1.3        | 60,760    |
| Liberia           | 367,478                        | 3,994,122     | 0.0920           | 17.2             | 112,638    | 15.56          | 231,809    | 1.5        | 23,030    |
| Angola            | 1,682,066                      | 19,081,912    | 0.0881           | 25.0             | 974,838    | 8.41           | 491,628    | 2          | 215,600   |
| Côte d'Ivoire     | 1,651,534                      | 19,737,800    | 0.0837           | 13.2             | 518,311    | 21.10          | 966,623    | 3.4        | 166,600   |
| Benin             | 732,327                        | 8,849,892     | 0.0827           | 13.0             | 248,863    | 23.34          | 435,445    | 1.2        | 48,020    |
| Botswana          | 161,239                        | 2,006,945     | 0.0803           | 7.0              | 13,221     | 1.04           | 10,818     | 24.8       | 137,200   |
| Zimbabwe          | 944,891                        | 12,571,454    | 0.0752           | 9.2              | 132,798    | 3.43           | 204,493    | 14.3       | 607,600   |
| Tanzania          | 3,360,788                      | 44,841,226    | 0.0749           | 11.6             | 1,025,316  | 16.43          | 1,355,472  | 5.6        | 980,000   |
| Togo              | 450,236                        | 6,027,798     | 0.0747           | 11.6             | 124,279    | 25.67          | 227,957    | 3.2        | 98,000    |
| Rwanda            | 753,413                        | 10,624,005    | 0.0709           | 22.6             | 357,674    | 5.91           | 309,499    | 2.9        | 86,240    |
| Congo, Rep.       | 270,651                        | 4,042,899     | 0.0669           | 14.3             | 81,602     | 23.85          | 125,349    | 3.4        | 63,700    |
| Kenya             | 2,637,405                      | 40,512,682    | 0.0651           | 20.5             | 796,738    | 10.94          | 762,667    | 6.3        | 1,078,000 |
| Ghana             | 1,542,491                      | 24,391,823    | 0.0632           | 9.5              | 669,521    | 26.25          | 657,370    | 1.8        | 215,600   |
| Gabon             | 90,936                         | 1,505,463     | 0.0604           | 5.9              | 16,740     | 29.32          | 38,915     | 5.2        | 35,280    |
| Ethiopia          | 4,754,652                      | 82,949,541    | 0.0573           | 22.8             | 3,507,206  | 6.78           | 1,247,446  | 1.5        | Unknown   |
| Sudan             | 1,925,260                      | 33,603,637    | 0.0573           | 10.6             | 850,260    | 24.89          | 526,200    | 1.1        | 548,800   |
| Afghanistan       | 1,954,973                      | 34,385,068    | 0.0569           | 28.9             | 1,864,324  | 0.01           | 90,648     | 0.2        | Unknown   |
| Senegal           | 623,509                        | 12,433,728    | 0.0501           | 14.8             | 229,547    | 18.73          | 335,162    | 0.9        | 58,800    |
| Madagascar        | 881,807                        | 20,713,819    | 0.0426           | 22.5             | 368,469    | 3.51           | 486,388    | 0.2        | 26,950    |
| Mauritania        | 144,515                        | 3,459,773     | 0.0418           | 15.7             | 83,866     | 13.33          | 46,929     | 0.7        | 13,720    |
| Namibia           | 87,587                         | 2,283,289     | 0.0384           | 6.3              | 15,072     | 5.11           | 15,675     | 13.1       | 56,840    |
| Eritrea           | 175,006                        | 5,253,676     | 0.0333           | 21.4             | 83,796     | 0.28           | 78,470     | 0.8        | 12,740    |
| Haiti             | 280,740                        | 9,993,247     | 0.0281           | 20.3             | 173,247    | 0.87           | 21,253     | 1.9        | 86,240    |
| India             | 33,617,476                     | 1,224,614,327 | 0.0275           | 13.0             | 30,747,070 | 0.34           | 1,498,406  | 0.3        | 1,372,000 |

IPC CEA Technical Supplement - 9

1  
2  
3  
4  
5  
6  
7  
8  
9  
10  
11  
12  
13  
14  
15  
16  
17  
18  
19  
20  
21  
22  
23  
24  
25  
26  
27  
28  
29  
30  
31  
32  
33  
34  
35  
36  
37  
38  
39  
40  
41  
42  
43  
44  
45  
46  
47  
48  
49  
50  
51  
52  
53  
54  
55  
56  
57  
58  
59  
60

|                    |           |               |        |      |           |      |         |      |         |
|--------------------|-----------|---------------|--------|------|-----------|------|---------|------|---------|
| Myanmar            | 1,243,928 | 47,963,012    | 0.0259 | 12.8 | 403,734   | 1.75 | 673,594 | 0.6  | 166,600 |
| Yemen              | 599,468   | 24,052,514    | 0.0249 | 20.2 | 415,209   | 0.46 | 184,259 | 0.2  | Unknown |
| Pakistan           | 3,465,577 | 173,593,383   | 0.0200 | 16.0 | 3,220,422 | 0.12 | 135,885 | 0.1  | 109,270 |
| Papua New Guinea   | 121,356   | 6,858,266     | 0.0177 | 5.2  | 31,732    | 7.29 | 58,264  | 0.9  | 31,360  |
| Guatemala          | 225,349   | 14,388,929    | 0.0157 | 19.1 | 152,755   | 0.00 | 1,054   | 0.8  | 71,540  |
| Cambodia           | 191,054   | 14,138,255    | 0.0135 | 7.1  | 121,042   | 0.78 | 53,352  | 0.5  | 16,660  |
| Nepal              | 297,240   | 29,959,364    | 0.0099 | 14.7 | 229,536   | 0.02 | 20,664  | 0.4  | 47,040  |
| Bolivia            | 98,154    | 9,929,849     | 0.0099 | 15.2 | 85,256    | 0.02 | 648     | 0.2  | 12,250  |
| Iraq               | 301,208   | 32,030,823    | 0.0094 | 11.6 | 301,208   | 0.00 | Unknown | 0.2  | Unknown |
| Algeria            | 296,287   | 35,468,208    | 0.0084 | 12.8 | 272,766   | 0.00 | 0       | 0.1  | 23,520  |
| Indonesia          | 1,849,471 | 239,870,937   | 0.0077 | 15.1 | 924,024   | 0.80 | 357,048 | 0.2  | 568,400 |
| Bangladesh         | 1,057,299 | 148,692,131   | 0.0071 | 11.0 | 939,026   | 1.77 | 104,553 | 0.06 | 13,720  |
| Russian Federation | 990,798   | 141,920,000   | 0.0070 | 1.2  | 74,498    | 0.00 | Unknown | 1    | 916,300 |
| Uzbekistan         | 166,792   | 28,562,400    | 0.0058 | 12.0 | 97,702    | 0.00 | 0       | 0.1  | 69,090  |
| Morocco            | 184,114   | 31,951,412    | 0.0058 | 12.4 | 149,814   | 0.00 | Unknown | 0.1  | 34,300  |
| Ukraine            | 255,845   | 45,870,700    | 0.0056 | 0.8  | 20,645    | 0.00 | Unknown | 1.1  | 235,200 |
| Thailand           | 365,406   | 69,122,234    | 0.0053 | 1.9  | 237,657   | 0.50 | 10,149  | 1.3  | 117,600 |
| Vietnam            | 408,534   | 86,927,700    | 0.0047 | 2.3  | 111,515   | 0.13 | 32,418  | 0.4  | 264,600 |
| Malaysia           | 114,666   | 28,401,017    | 0.0040 | 1.0  | 16,176    | 0.17 | 490     | 0.5  | 98,000  |
| Brazil             | 728,402   | 194,946,470   | 0.0037 | 5.3  | 292,349   | 0.06 | 4,853   | 0.45 | 431,200 |
| Peru               | 106,711   | 29,076,512    | 0.0037 | 4.5  | 62,255    | 0.12 | 356     | 0.4  | 44,100  |
| Colombia           | 159,217   | 46,294,841    | 0.0034 | 4.1  | 65,031    | 0.07 | 2,067   | 0.5  | 92,120  |
| Mexico             | 321,228   | 113,423,047   | 0.0028 | 5.5  | 175,197   | 0.00 | 12      | 0.3  | 146,020 |
| Philippines        | 255,050   | 93,260,798    | 0.0027 | 6.7  | 226,838   | 0.05 | 7,633   | 0.06 | 20,580  |
| Argentina          | 106,812   | 40,412,376    | 0.0026 | 0.9  | 33,311    | 0.00 | 1       | 0.5  | 73,500  |
| China              | 1,766,094 | 1,337,825,000 | 0.0013 | 3.1  | 848,167   | 0.00 | 1,627   | 0.1  | 916,300 |
| Turkey             | 89,042    | 72,752,325    | 0.0012 | 1.3  | 82,672    | 0.00 | 0       | 0.06 | 6,370   |

**Total DALY burden:** Total annual DALYs for diarrhoea, malaria and HIV/AIDS. Source: calculated as sum of DALYs across the 3 diseases.  
**Population:** Total country population, 2010 data. Source: World Bank - <http://data.worldbank.org/indicator/SP.POP.TOTL>  
**DALYs per capita:** DALYs per person, calculated as total DALY burden, diarrhoeal disease divided by population.  
**Diarrhoea burden:** percentage of childhood (<5) deaths due to diarrhoea. Source: Black et al, Global, regional, and national causes of child mortality in 2008: a systematic analysis. Lancet 2010.  
**Annual deaths:** Total number of deaths from diarrhoeal disease in children <5 yrs. Source: Black et al, Global, regional, and national causes of child mortality in 2008: a systematic analysis. Lancet 2010.  
**DALYs (Diarrhoea):** Total DALYs from diarrhoeal disease in children < 5 yrs. Source: derivation.  
**Malaria burden:** Percentage of childhood (<5) deaths due to malaria. Source: Black et al, Global, regional, and national causes of child mortality in 2008: a systematic analysis. Lancet 2010.  
**DALYs (Malaria):** Total DALYs from malaria in children < 5 yrs. Source: derivation.  
**HIV burden:** Prevalence in 15-49 year olds. Source: AIDSInfo database, via Gampinder.org  
**DALYs (HIV):** Total DALYs from HIV/AIDS. Source: derivation.

Tech. Suppl. - Table 5. Results for Kenya, Bangladesh and Nigeria, per 1000 campaign participants.

|                              |                            | Malaria<br>LLITN | Diarrhea<br>Filters | HIV        |          | TOTAL      |
|------------------------------|----------------------------|------------------|---------------------|------------|----------|------------|
|                              |                            |                  |                     | VCT        | Condoms  |            |
| <b>Kenya</b>                 |                            |                  |                     |            |          |            |
| <b>Disease averted</b>       | Deaths                     |                  |                     |            |          |            |
|                              | Episodes                   | 1.6              | 2.4                 | 4.8        | 2.2      | 10.9       |
|                              |                            | 133.6            | 1,877.7             |            |          | 2,018.3    |
| <b>DALYs averted</b>         | Prevention                 | 44.1             | 68.3                | 40.0       | 18.2     | 170.6      |
|                              | Earlier HIV care           |                  |                     | 123.5      |          | 123.5      |
|                              | TOTAL                      | 44.1             | 68.3                | 181.8      |          | 294.1      |
| <b>Costs averted (added)</b> | Prevention                 | \$773            | \$9,068             | \$40,889   | \$18,588 | \$69,318   |
|                              | Earlier HIV care           |                  |                     | (\$81,187) |          | (\$81,187) |
|                              | TOTAL                      | \$773            | \$9,068             | (\$21,710) |          | -\$11,869  |
| <b>Cost-effectiveness</b>    | Campaign cost (unadjusted) |                  |                     |            |          | \$34,280   |
|                              | Net cost (savings)         |                  |                     |            |          | \$46,149   |
|                              | Cost per DALY averted      |                  |                     |            |          | \$157      |
| <b>Bangladesh</b>            |                            |                  |                     |            |          |            |
| <b>Disease averted</b>       | Deaths                     | 0.1              | 0.8                 | 0.0        | 0.0      | 0.9        |
|                              | Episodes                   | 14.7             | 1061.3              | 0.1        |          | 1076.1     |
| <b>DALYs averted</b>         | Prevention                 | 1.7              | 22.4                | 0.4        | 0.2      | 24.7       |
|                              | Earlier HIV care           |                  |                     | 1.2        |          | 1.2        |
|                              | TOTAL                      | 1.7              | 22.4                | 1.8        |          | 25.9       |
| <b>Costs averted (added)</b> | Prevention                 | \$89             | \$5,527             | \$389      | \$189    | \$6,196    |
|                              | Earlier HIV care           |                  |                     | (\$773)    |          | (\$773)    |
|                              | TOTAL                      | \$89             | \$5,527             | (\$195)    |          | \$5,422    |
| <b>Cost-effectiveness</b>    | Campaign cost (unadjusted) |                  |                     |            |          | \$36,658   |
|                              | Net cost (savings)         |                  |                     |            |          | \$30,236   |
|                              | Cost per DALY averted      |                  |                     |            |          | \$1,168    |
| <b>Nigeria</b>               |                            |                  |                     |            |          |            |
| <b>Disease averted</b>       | Deaths                     | 6.0              | 3.4                 | 2.7        | 1.3      | 13.4       |
|                              | Episodes                   |                  |                     | 4.0        |          |            |
|                              |                            | 734.3            | 2,363.3             |            |          | 3,101.7    |
| <b>DALYs averted</b>         | Prevention                 | 168.8            | 97.6                | 21.8       | 10.2     | 298.4      |

IPC CEA Technical Supplement - 11

1  
2  
3  
4  
5  
6  
7  
8  
9  
10  
11  
12  
13  
14  
15  
16  
17  
18  
19  
20  
21  
22  
23  
24  
25  
26  
27  
28  
29  
30  
31  
32  
33  
34  
35  
36  
37  
38  
39  
40  
41  
42  
43  
44  
45  
46  
47  
48  
49  
50  
51  
52  
53  
54  
55  
56  
57  
58  
59  
60

|                              |                            |         |          |           |          |            |
|------------------------------|----------------------------|---------|----------|-----------|----------|------------|
|                              | Earlier HIV care           |         |          | 70.8      |          | 70.8       |
|                              | TOTAL                      | 168.8   | 97.6     | 102.9     |          | 369.3      |
| <b>Costs averted (added)</b> | Prevention                 | \$6,223 | \$14,300 | \$28,605  | \$13,379 | \$62,507   |
|                              | Earlier HIV care           |         |          | (\$55,797 |          | (\$55,797) |
|                              | TOTAL                      | \$6,223 | \$14,300 | (\$14,813 |          | \$5,710    |
|                              |                            |         |          | )         |          | )          |
| <b>Cost-effectiveness</b>    | Campaign cost (unadjusted) |         |          |           |          | \$40,479   |
|                              | Net cost (savings)         |         |          |           |          | \$34,769   |
|                              | Cost per DALY averted      |         |          |           |          | \$94       |

**Tech. Suppl. - Table 6.** Annual and cumulative results for campaigns 1 and 2 for Kenya, projected for 30 years. Assumes the second campaign starts 3 years after initial campaign. All outcomes discounted at 3% per annum.

| Year | Annual    |                   | Cumulative |               |                      | Annual DALYs averted |          |      |       | Cumulative DALYs averted |          |       |       |
|------|-----------|-------------------|------------|---------------|----------------------|----------------------|----------|------|-------|--------------------------|----------|-------|-------|
|      | Net costs | Net DALYs averted | Net costs  | DALYs averted | CE (\$/DALY averted) | Malaria              | Diarrhea | HIV  | Total | Malaria                  | Diarrhea | HIV   | Total |
| 1    | \$20,151  | 5.2               | \$20,151   | 5.2           | \$3,856              | 1.7                  | 3.2      | 0.3  | 5.2   | 1.7                      | 3.2      | 0.3   | 5.2   |
| 2    | \$4,168   | 6.0               | \$24,318   | 11.3          | \$2,161              | 1.6                  | 3.0      | 1.4  | 6.0   | 3.3                      | 6.2      | 1.7   | 11.3  |
| 3    | \$2,700   | 7.1               | \$27,019   | 18.3          | \$1,475              | 1.6                  | 2.9      | 2.6  | 7.1   | 4.9                      | 9.1      | 4.3   | 18.3  |
| 4    | \$27,259  | 11.6              | \$54,278   | 29.9          | \$1,817              | 1.9                  | 4.7      | 4.9  | 11.6  | 6.9                      | 13.8     | 9.2   | 29.9  |
| 5    | \$1,996   | 11.5              | \$56,274   | 41.4          | \$1,360              | 1.9                  | 4.5      | 5.1  | 11.5  | 8.7                      | 18.3     | 14.3  | 41.4  |
| 6    | \$2,136   | 11.5              | \$58,410   | 52.9          | \$1,104              | 1.8                  | 4.4      | 5.4  | 11.5  | 10.5                     | 22.7     | 19.7  | 52.9  |
| 7    | \$1,878   | 11.5              | \$60,288   | 64.4          | \$936                | 1.7                  | 3.9      | 5.9  | 11.5  | 12.2                     | 26.6     | 25.6  | 64.4  |
| 8    | \$874     | 11.2              | \$61,162   | 75.6          | \$809                | 1.7                  | 3.8      | 5.8  | 11.2  | 13.9                     | 30.3     | 31.4  | 75.6  |
| 9    | \$1,668   | 10.9              | \$62,830   | 86.5          | \$727                | 1.6                  | 3.7      | 5.6  | 10.9  | 15.5                     | 34.0     | 37.0  | 86.5  |
| 10   | \$1,786   | 10.6              | \$64,616   | 97.0          | \$666                | 1.6                  | 3.5      | 5.5  | 10.6  | 17.1                     | 37.5     | 42.4  | 97.0  |
| 11   | \$1,896   | 11.3              | \$66,511   | 108.3         | \$614                | 1.5                  | 3.4      | 6.3  | 11.3  | 18.6                     | 41.0     | 48.7  | 108.3 |
| 12   | \$2,149   | 12.0              | \$68,661   | 120.3         | \$571                | 1.5                  | 3.3      | 7.2  | 12.0  | 20.0                     | 44.3     | 55.9  | 120.3 |
| 13   | \$2,239   | 12.7              | \$70,900   | 133.0         | \$533                | 1.4                  | 3.2      | 8.0  | 12.7  | 21.5                     | 47.6     | 63.9  | 133.0 |
| 14   | \$2,100   | 14.3              | \$73,000   | 147.3         | \$496                | 1.4                  | 3.1      | 9.8  | 14.3  | 22.9                     | 50.7     | 73.7  | 147.3 |
| 15   | \$1,967   | 17.4              | \$74,967   | 164.7         | \$455                | 1.3                  | 3.1      | 13.0 | 17.4  | 24.2                     | 53.8     | 86.7  | 164.7 |
| 16   | \$1,840   | 17.2              | \$76,807   | 181.9         | \$422                | 1.3                  | 3.0      | 12.9 | 17.2  | 25.5                     | 56.7     | 99.7  | 181.9 |
| 17   | \$1,651   | 16.8              | \$78,458   | 198.8         | \$395                | 1.3                  | 2.9      | 12.7 | 16.8  | 26.8                     | 59.6     | 112.3 | 198.8 |
| 18   | \$1,471   | 16.6              | \$79,929   | 215.3         | \$371                | 1.2                  | 2.8      | 12.5 | 16.6  | 28.0                     | 62.4     | 124.9 | 215.3 |
| 19   | \$1,301   | 14.7              | \$81,230   | 230.1         | \$353                | 1.2                  | 2.7      | 10.8 | 14.7  | 29.2                     | 65.1     | 135.7 | 230.1 |
| 20   | \$1,139   | 14.4              | \$82,368   | 244.5         | \$337                | 1.2                  | 2.6      | 10.6 | 14.4  | 30.4                     | 67.8     | 146.3 | 244.5 |
| 21   | \$985     | 12.7              | \$83,354   | 257.2         | \$324                | 1.1                  | 2.6      | 9.0  | 12.7  | 31.5                     | 70.3     | 155.3 | 257.2 |
| 22   | \$840     | 8.8               | \$84,193   | 266.0         | \$317                | 1.1                  | 2.5      | 5.2  | 8.8   | 32.6                     | 72.8     | 160.6 | 266.0 |
| 23   | \$702     | 8.2               | \$84,895   | 274.2         | \$310                | 1.1                  | 2.4      | 4.8  | 8.2   | 33.7                     | 75.2     | 165.3 | 274.2 |
| 24   | \$571     | 7.8               | \$85,466   | 282.1         | \$303                | 1.0                  | 2.3      | 4.5  | 7.8   | 34.7                     | 77.6     | 169.8 | 282.1 |
| 25   | \$2,188   | 6.8               | \$87,653   | 288.9         | \$303                | 1.0                  | 2.3      | 3.5  | 6.8   | 35.7                     | 79.8     | 173.3 | 288.9 |
| 26   | \$2,020   | 6.6               | \$89,673   | 295.5         | \$304                | 1.0                  | 2.2      | 3.4  | 6.6   | 36.7                     | 82.1     | 176.7 | 295.5 |
| 27   | \$106     | 6.4               | \$89,779   | 301.9         | \$297                | 0.9                  | 2.1      | 3.3  | 6.4   | 37.6                     | 84.2     | 180.0 | 301.9 |
| 28   | \$617     | 6.2               | \$90,396   | 308.1         | \$293                | 0.9                  | 2.1      | 3.2  | 6.2   | 38.6                     | 86.3     | 183.3 | 308.1 |
| 29   | \$575     | 6.0               | \$90,971   | 314.1         | \$290                | 0.9                  | 2.0      | 3.1  | 6.0   | 39.4                     | 88.3     | 186.4 | 314.1 |
| 30   | \$0       | 5.9               | \$90,971   | 320.0         | \$284                | 0.9                  | 2.0      | 3.0  | 5.9   | 40.3                     | 90.3     | 189.4 | 320.0 |

**Tech. Suppl. - Table 7.** Country-specific estimates for unit costs of antiretroviral therapy for HIV adjusted to 2012 US\$. In countries with multiple estimate, the mean is shown.

| ART UNIT COSTS |                                 |                                                                    |
|----------------|---------------------------------|--------------------------------------------------------------------|
| Country        | ART per person-year (2012 US\$) | Sources                                                            |
| Benin          | \$701                           | Hounton et al. 2008                                                |
| Botswana       | \$703                           | Menzies, 2011                                                      |
| Brazil         | \$1,786                         | Acurcio, 2006 (Cited in Galarraga 2011)                            |
| Ethiopia       | \$610                           | Menzies 2011; Bikilla et al. 2009;                                 |
| Haiti          | \$1,120                         | Koenig 2008                                                        |
| India          | \$230                           | Gupta 2009                                                         |
| Lesotho        | \$165                           | Cleary 2006                                                        |
| Mexico         | \$5,990                         | Bautista 2003; Bautista 2008; Aracena-Genao                        |
| Morocco        | \$1,102                         | Loubiere 2008 (Cited in Galarraga 2011)                            |
| Nigeria        | \$938                           | Menzies, 2011; Kombe 2004                                          |
| South Africa   | \$1,260                         | Cleary 2006; Kevany 2009; Deghaye 2006; Martinson 2009; Rosen 2008 |
| Thailand       | \$3,994                         | Kitajima 2003                                                      |
| Uganda         | \$805                           | Marseille 2009; Jaffar 2009                                        |
| Zambia         | \$794                           | Marseille 2012                                                     |
| Vietnam        | \$964                           | Menzies, 2011                                                      |



1  
2  
3  
4  
5  
6  
7  
8  
9 **Methods for estimating health care and campaign costs.**

10 There is no recognized 'gold standard' for adjusting program and health care costs by country setting. While per-  
11 capita GDP may reflect overall ability to pay it assumes that health care is a normal good in which consumption  
12 increases monotonically with income. It also lacks the specificity to capture both the unit cost and the relevant  
13 quantity utilized of various health inputs, such as inpatient days or outpatient visits. These utilization patterns can  
14 vary by country partially independently of income. An alternative index is per-capita spending on health care. This  
15 is a more direct measure of overall health care spending, but also fails to capture the detailed inputs cost and  
16 utilization mix. Finally, WHO CHOICE provides country specific costs for inpatient days and outpatient visits at  
17 various levels of facilities (e.g. primary, secondary, and teaching hospitals). By comparing the WHO CHOICE-  
18 derived costs for Kenya against the other 69 countries, yet a third index can be created. However, this WHO-  
19 CHOICE based index has its own short-comings. In addition to not reflecting the specific mix of inputs needed for  
20 the present analysis, the methods used to derive the costs are somewhat opaque. The regression model used to  
21 predict country health care costs includes per-capita GDP, and thus may be similar to using a per-capita GDP-  
22 based index.

23 The variation in the results yielded by each method is modest. Table 8 shows the base case results using the per-  
24 capita health care spending approach; Table 9 uses the index derived from WHO CHOICE. These show very little  
25 difference in the cost effectiveness results by country rankings when compared with the per-capita GDP approach  
26 (Table 3 in the main paper).  
27  
28  
29  
30  
31  
32  
33  
34  
35  
36  
37  
38  
39  
40  
41  
42  
43  
44  
45  
46  
47  
48  
49  
50  
51  
52  
53  
54  
55  
56  
57  
58  
59  
60

**Table 8.** Summary costs and cost-effectiveness results per 1,000 IPC participants for 70 countries ordered from highest to lowest cost-effectiveness. Grey cells indicate cost-effectiveness ratios less favorable than investment in ART. Results shown are for the first 3-year campaign. Non-tradable portion of costs imputed from Kenya trial data based on per-capita health care spending. Sources: WHO, World Health Statistics 2012, <http://apps.who.int/gho/data/node.main.78?lang=en>. Definitions: Health Expenditure per-capita (PPP; International \$): The sum of public and private health expenditure (in PPP, International \$) divided by population. Health expenditure includes the provision of health services, family planning activities, nutrition activities and emergency aid designated for health, but excludes the provision of water and sanitation.

| Country              | World Bank income classification | DALYs per capita | Costs             |          | Disease averted |          |         | Cost-effectiveness (CE)        |                           |           |
|----------------------|----------------------------------|------------------|-------------------|----------|-----------------|----------|---------|--------------------------------|---------------------------|-----------|
|                      |                                  |                  | IPC campaign cost | Net cost | Deaths          | Episodes |         | Campaign cost per DALY averted | Net cost per DALY averted | CE of ART |
| 1 Guinea-Bissau      | Low                              | 0.134            | \$31,652          | \$2,286  | 40.7            | 10,523   | 1,145.2 | \$28                           | \$2                       | \$1,005   |
| 2 Sierra Leone       | Low                              | 0.119            | \$52,305          | \$4,927  | 16.0            | 4,118    | 447.9   | \$117                          | \$11                      | \$764     |
| 3 Senegal            | Lower middle                     | 0.050            | \$36,210          | \$11,527 | 10.7            | 5,735    | 305.4   | \$119                          | \$38                      | \$768     |
| 4 Burkina Faso       | Low                              | 0.126            | \$35,260          | \$20,805 | 16.4            | 4,124    | 459.8   | \$77                           | \$45                      | \$819     |
| 5 Somalia            | Low                              | 0.121            | \$26,015          | \$22,924 | 16.8            | 3,682    | 470.8   | \$55                           | \$49                      | \$1,535   |
| 6 Mali               | Low                              | 0.124            | \$32,840          | \$22,058 | 15.9            | 4,222    | 445.4   | \$74                           | \$50                      | \$888     |
| 7 Niger              | Low                              | 0.110            | \$28,445          | \$21,450 | 14.8            | 4,967    | 419.1   | \$68                           | \$51                      | \$1,095   |
| 8 Afghanistan        | Low                              | 0.057            | \$28,905          | \$18,828 | 12.7            | 4,146    | 356.9   | \$81                           | \$53                      | \$935     |
| 9 Sudan              | Lower middle                     | 0.057            | \$45,505          | \$10,906 | 6.9             | 4,907    | 198.4   | \$229                          | \$55                      | \$703     |
| 10 Guinea            | Low                              | 0.095            | \$31,875          | \$21,102 | 12.6            | 4,272    | 355.2   | \$90                           | \$59                      | \$928     |
| 11 Lesotho           | Lower middle                     | 0.115            | \$55,557          | \$54,805 | 31.3            | 1,756    | 859.0   | \$65                           | \$64                      | \$738     |
| 12 Congo, DR         | Low                              | 0.112            | \$25,386          | \$25,306 | 13.4            | 3,517    | 376.8   | \$67                           | \$67                      | \$1,493   |
| 13 Chad              | Low                              | 0.120            | \$28,103          | \$29,728 | 15.3            | 4,335    | 427.1   | \$66                           | \$70                      | \$807     |
| 14 Liberia           | Low                              | 0.092            | \$36,982          | \$23,225 | 11.9            | 3,401    | 333.2   | \$111                          | \$70                      | \$1,025   |
| 15 Côte d'Ivoire     | Lower middle                     | 0.084            | \$43,278          | \$30,730 | 14.1            | 4,021    | 393.7   | \$110                          | \$78                      | \$801     |
| 16 Burundi           | Low                              | 0.118            | \$28,504          | \$34,224 | 14.3            | 2,267    | 393.6   | \$72                           | \$87                      | \$987     |
| 17 Uganda            | Low                              | 0.105            | \$37,888          | \$36,726 | 14.9            | 3,492    | 409.5   | \$93                           | \$90                      | \$749     |
| 18 Benin             | Low                              | 0.083            | \$32,216          | \$25,362 | 10.0            | 3,096    | 280.0   | \$115                          | \$91                      | \$910     |
| 19 Nigeria           | Lower middle                     | 0.133            | \$45,846          | \$34,213 | 13.4            | 3,102    | 370.6   | \$124                          | \$92                      | \$747     |
| 20 Mozambique        | Low                              | 0.141            | \$31,652          | \$58,371 | 22.2            | 3,816    | 606.8   | \$52                           | \$96                      | \$1,109   |
| 21 Cen. African Rep. | Low                              | 0.105            | \$26,663          | \$37,686 | 13.8            | 2,819    | 380.3   | \$70                           | \$99                      | \$1,230   |
| 22 Congo, Rep.       | Lower middle                     | 0.067            | \$42,684          | \$33,709 | 11.5            | 2,981    | 319.7   | \$134                          | \$105                     | \$756     |
| 23 Togo              | Low                              | 0.075            | \$32,973          | \$32,220 | 10.4            | 2,849    | 287.6   | \$115                          | \$112                     | \$864     |
| 24 Zambia            | Lower middle                     | 0.128            | \$38,512          | \$68,361 | 21.8            | 3,107    | 594.6   | \$65                           | \$115                     | \$826     |
| 25 Malawi            | Low                              | 0.110            | \$34,146          | \$58,110 | 18.3            | 2,965    | 496.4   | \$69                           | \$117                     | \$996     |
| 26 Tanzania          | Low                              | 0.075            | \$30,345          | \$39,174 | 12.1            | 3,122    | 331.0   | \$92                           | \$118                     | \$935     |
| 27 Ethiopia          | Low                              | 0.057            | \$28,371          | \$28,810 | 8.6             | 1,986    | 237.4   | \$120                          | \$121                     | \$1,139   |

IPC CEA Technical Supplement - 16

1  
2  
3  
4  
5  
6  
7  
8  
9  
10  
11  
12  
13  
14  
15  
16  
17  
18  
19  
20  
21  
22  
23  
24  
25  
26  
27  
28  
29  
30  
31  
32  
33  
34  
35  
36  
37  
38  
39  
40  
41  
42  
43  
44  
45  
46  
47  
48  
49  
50  
51  
52  
53  
54  
55  
56  
57  
58  
59  
60

|    |                  |              |       |           |           |      |       |       |         |         |         |
|----|------------------|--------------|-------|-----------|-----------|------|-------|-------|---------|---------|---------|
| 28 | Angola           | Upper middle | 0.088 | \$53,374  | \$39,069  | 11.5 | 3,268 | 321.5 | \$166   | \$122   | \$674   |
| 29 | Cameroon         | Lower middle | 0.100 | \$39,729  | \$52,377  | 14.3 | 3,115 | 394.2 | \$101   | \$133   | \$741   |
| 30 | Rwanda           | Low          | 0.071 | \$43,307  | \$37,051  | 9.6  | 2,216 | 265.0 | \$163   | \$140   | \$768   |
| 31 | Kenya            | Low          | 0.065 | \$34,280  | \$46,149  | 10.9 | 2,018 | 294.1 | \$117   | \$157   | \$883   |
| 32 | Zimbabwe         | Low          | 0.075 | \$25,326  | \$76,203  | 17.8 | 1,682 | 478.9 | \$53    | \$159   | \$1,731 |
| 33 | Yemen            | Lower middle | 0.025 | \$39,388  | \$20,853  | 4.3  | 3,128 | 122.6 | \$321   | \$170   | \$719   |
| 34 | Mauritania       | Lower middle | 0.042 | \$39,952  | \$29,100  | 5.8  | 2,607 | 164.0 | \$244   | \$177   | \$955   |
| 35 | Ghana            | Lower middle | 0.063 | \$37,606  | \$34,488  | 6.8  | 1,966 | 189.9 | \$198   | \$182   | \$746   |
| 36 | Pakistan         | Lower middle | 0.020 | \$35,334  | \$20,601  | 3.8  | 2,748 | 108.0 | \$327   | \$191   | \$904   |
| 37 | Madagascar       | Low          | 0.043 | \$27,806  | \$24,564  | 4.5  | 1,910 | 127.6 | \$218   | \$192   | \$1,025 |
| 38 | Eritrea          | Low          | 0.033 | \$24,332  | \$25,362  | 4.3  | 1,942 | 119.5 | \$204   | \$212   | \$1,753 |
| 39 | Swaziland        | Lower middle | 0.150 | \$88,325  | \$197,225 | 29.1 | 2,230 | 800.0 | \$110   | \$247   | \$632   |
| 40 | Haiti            | Low          | 0.028 | \$34,310  | \$31,765  | 4.4  | 3,128 | 121.7 | \$282   | \$261   | \$869   |
| 41 | Botswana         | Upper middle | 0.080 | \$151,324 | \$196,117 | 26.8 | 1,111 | 734.1 | \$206   | \$267   | \$577   |
| 42 | Guatemala        | Lower middle | 0.016 | \$76,551  | \$19,936  | 2.4  | 3,143 | 68.3  | \$1,121 | \$292   | \$627   |
| 43 | Myanmar          | Low          | 0.026 | \$25,550  | \$25,518  | 2.9  | 1,306 | 83.1  | \$307   | \$307   | \$1,354 |
| 44 | India            | Lower middle | 0.027 | \$45,178  | \$33,274  | 3.7  | 1,255 | 104.6 | \$432   | \$318   | \$733   |
| 45 | Papua New Guinea | Lower middle | 0.018 | \$44,272  | \$24,760  | 2.4  | 2,868 | 70.6  | \$627   | \$351   | \$864   |
| 46 | South Africa     | Upper middle | 0.097 | \$167,731 | \$223,292 | 21.5 | 1,150 | 579.7 | \$289   | \$385   | \$582   |
| 47 | Gabon            | Upper middle | 0.060 | \$104,762 | \$107,288 | 9.3  | 1,876 | 251.5 | \$417   | \$427   | \$613   |
| 48 | Iraq             | Upper middle | 0.009 | \$43,990  | \$25,081  | 1.9  | 2,587 | 55.5  | \$792   | \$452   | \$758   |
| 49 | Namibia          | Upper middle | 0.038 | \$113,745 | \$218,642 | 15.6 | 1,528 | 416.7 | \$273   | \$525   | \$606   |
| 50 | Cambodia         | Low          | 0.014 | \$41,971  | \$32,821  | 1.9  | 1,341 | 53.9  | \$779   | \$609   | \$739   |
| 51 | Nepal            | Low          | 0.010 | \$33,760  | \$30,891  | 1.4  | 1,135 | 39.2  | \$861   | \$788   | \$883   |
| 52 | Morocco          | Lower middle | 0.006 | \$72,424  | \$50,688  | 1.9  | 1,623 | 54.5  | \$1,329 | \$930   | \$650   |
| 53 | Bangladesh       | Low          | 0.007 | \$31,949  | \$28,039  | 0.9  | 1,076 | 25.8  | \$1,237 | \$1,086 | \$1,046 |
| 54 | Algeria          | Upper middle | 0.008 | \$87,063  | \$59,839  | 1.4  | 1,304 | 40.8  | \$2,136 | \$1,468 | \$606   |
| 55 | Uzbekistan       | Lower middle | 0.006 | \$54,666  | \$26,791  | 0.6  | 2,352 | 18.1  | \$3,021 | \$1,481 | \$717   |
| 56 | Indonesia        | Lower middle | 0.008 | \$44,169  | \$38,316  | 0.7  | 814   | 20.5  | \$2,158 | \$1,872 | \$793   |
| 57 | Thailand         | Upper middle | 0.005 | \$79,120  | \$90,878  | 1.8  | 455   | 46.5  | \$1,700 | \$1,952 | \$622   |
| 58 | Bolivia          | Lower middle | 0.010 | \$67,123  | \$33,507  | 0.4  | 2,015 | 13.1  | \$5,105 | \$2,549 | \$668   |
| 59 | Vietnam          | Lower middle | 0.005 | \$51,726  | \$44,913  | 0.6  | 828   | 16.7  | \$3,102 | \$2,694 | \$664   |
| 60 | Ukraine          | Lower middle | 0.006 | \$105,326 | \$92,351  | 1.2  | 623   | 32.8  | \$3,209 | \$2,814 | \$600   |
| 61 | Peru             | Upper middle | 0.004 | \$104,227 | \$63,328  | 0.6  | 1,497 | 17.8  | \$5,864 | \$3,563 | \$613   |
| 62 | Philippines      | Lower middle | 0.003 | \$51,949  | \$39,286  | 0.3  | 1,289 | 10.8  | \$4,832 | \$3,654 | \$724   |

IPC CEA Technical Supplement - 17

|    |                    |               |       |           |           |     |       |      |          |          |       |
|----|--------------------|---------------|-------|-----------|-----------|-----|-------|------|----------|----------|-------|
| 63 | Colombia           | Upper middle  | 0.003 | \$129,275 | \$80,234  | 0.6 | 1,419 | 18.7 | \$6,900  | \$4,283  | \$598 |
| 64 | Malaysia           | Upper middle  | 0.004 | \$122,297 | \$93,832  | 0.6 | 930   | 16.5 | \$7,428  | \$5,699  | \$591 |
| 65 | Brazil             | Upper middle  | 0.004 | \$186,498 | \$105,365 | 0.6 | 1,385 | 18.1 | \$10,306 | \$5,822  | \$581 |
| 66 | Russian Federation | High: nonOECD | 0.007 | \$240,707 | \$192,690 | 1.1 | 735   | 30.2 | \$7,975  | \$6,384  | \$579 |
| 67 | Argentina          | Upper middle  | 0.003 | \$252,229 | \$164,213 | 0.6 | 1,097 | 16.6 | \$15,161 | \$9,871  | \$577 |
| 68 | Turkey             | Upper middle  | 0.001 | \$191,725 | \$80,928  | 0.1 | 1,784 | 5.9  | \$32,276 | \$13,624 | \$582 |
| 69 | China              | Upper middle  | 0.001 | \$93,151  | \$81,634  | 0.1 | 486   | 4.4  | \$20,990 | \$18,395 | \$638 |
| 70 | Mexico             | Upper middle  | 0.003 | \$179,550 | \$187,187 | 0.3 | 0     | 8.7  | \$20,612 | \$21,489 | \$583 |

IPC CEA Technical Supplement - 18

**Tech. Suppl. - Table 9.** Summary costs and cost-effectiveness results per 1,000 IPC participants for 70 countries ordered from highest to lowest cost-effectiveness. Grey cells indicate cost-effectiveness ratios less favorable than investment in ART. Results shown are for the first 3-year campaign. Non-tradable portion of costs imputed from Kenya trial data based on WHO-CHOICE data on costs for inpatient day and outpatient visit assuming 75% of costs are for outpatient; 25% for inpatient. Source: WHO-CHOICE: [http://www.who.int/choice/cost-effectiveness/inputs/health\\_service/en/](http://www.who.int/choice/cost-effectiveness/inputs/health_service/en/)

Formatted: Underline

|    | Country           | World Bank income classification | DALYs per capita | Costs             |          | Disease averted |          | DALYs averted | Cost-effectiveness (CE)        |                           |           |
|----|-------------------|----------------------------------|------------------|-------------------|----------|-----------------|----------|---------------|--------------------------------|---------------------------|-----------|
|    |                   |                                  |                  | IPC campaign cost | Net cost | Deaths          | Episodes |               | Campaign cost per DALY averted | Net cost per DALY averted | CE of ART |
| 1  | Guinea-Bissau     | Low                              | 0.134            | \$26,373          | \$17,367 | 40.7            | 10,523   | 1,145.2       | \$23                           | \$15                      | \$1,005   |
| 2  | Senegal           | Lower middle                     | 0.050            | \$36,106          | \$11,638 | 10.7            | 5,735    | 305.4         | \$118                          | \$38                      | \$768     |
| 3  | Burkina Faso      | Low                              | 0.126            | \$33,007          | \$21,650 | 16.4            | 4,124    | 459.8         | \$72                           | \$47                      | \$819     |
| 4  | Sierra Leone      | Low                              | 0.119            | \$28,338          | \$22,441 | 16.0            | 4,118    | 447.9         | \$63                           | \$50                      | #N/A      |
| 5  | Mali              | Low                              | 0.124            | \$31,186          | \$22,527 | 15.9            | 4,222    | 445.4         | \$70                           | \$51                      | \$888     |
| 6  | Niger             | Low                              | 0.110            | \$27,560          | \$21,862 | 14.8            | 4,967    | 419.1         | \$66                           | \$52                      | \$1,095   |
| 7  | Afghanistan       | Low                              | 0.057            | \$28,280          | \$19,188 | 12.7            | 4,146    | 356.9         | \$79                           | \$54                      | \$935     |
| 8  | Lesotho           | Lower middle                     | 0.115            | \$34,378          | \$46,888 | 31.3            | 1,756    | 859.0         | \$40                           | \$55                      | \$738     |
| 9  | Guinea            | Low                              | 0.095            | \$30,485          | \$21,805 | 12.6            | 4,272    | 355.2         | \$86                           | \$61                      | \$928     |
| 10 | Chad              | Low                              | 0.120            | \$32,650          | \$27,127 | 15.3            | 4,335    | 427.1         | \$76                           | \$64                      | \$807     |
| 11 | Congo, DR         | Low                              | 0.112            | \$24,540          | \$25,512 | 13.4            | 3,517    | 376.8         | \$65                           | \$68                      | \$1,493   |
| 12 | Liberia           | Low                              | 0.092            | \$25,154          | \$26,045 | 11.9            | 3,401    | 333.2         | \$75                           | \$78                      | \$1,025   |
| 13 | Sudan             | Lower middle                     | 0.057            | \$38,572          | \$15,919 | 6.9             | 4,907    | 198.4         | \$194                          | \$80                      | \$703     |
| 14 | Burundi           | Low                              | 0.118            | \$25,095          | \$33,564 | 14.3            | 2,267    | 393.6         | \$64                           | \$85                      | \$987     |
| 15 | Côte d'Ivoire     | Lower middle                     | 0.084            | \$34,943          | \$34,796 | 14.1            | 4,021    | 393.7         | \$89                           | \$88                      | \$801     |
| 16 | Benin             | Low                              | 0.083            | \$33,846          | \$25,342 | 10.0            | 3,096    | 280.0         | \$121                          | \$91                      | \$910     |
| 17 | Nigeria           | Lower middle                     | 0.133            | \$38,931          | \$34,929 | 13.4            | 3,102    | 370.6         | \$105                          | \$94                      | \$747     |
| 18 | Uganda            | Low                              | 0.105            | \$32,646          | \$39,581 | 14.9            | 3,492    | 409.5         | \$80                           | \$97                      | \$749     |
| 19 | Mozambique        | Low                              | 0.141            | \$28,771          | \$59,852 | 22.2            | 3,816    | 606.8         | \$47                           | \$99                      | \$1,109   |
| 20 | Ken. African Rep. | Low                              | 0.105            | \$28,010          | \$37,642 | 13.8            | 2,819    | 380.3         | \$74                           | \$99                      | \$1,230   |
| 21 | Congo, Rep.       | Lower middle                     | 0.067            | \$51,672          | \$33,891 | 11.5            | 2,981    | 319.7         | \$162                          | \$106                     | #N/A      |
| 22 | Togo              | Low                              | 0.075            | \$31,613          | \$32,267 | 10.4            | 2,849    | 287.6         | \$110                          | \$112                     | \$864     |
| 23 | Angola            | Upper middle                     | 0.088            | \$62,105          | \$37,627 | 11.5            | 3,268    | 321.5         | \$193                          | \$117                     | \$674     |
| 24 | Tanzania          | Low                              | 0.075            | \$32,091          | \$38,786 | 12.1            | 3,122    | 331.0         | \$97                           | \$117                     | \$935     |
| 25 | Zambia            | Lower middle                     | 0.128            | \$32,785          | \$70,043 | 21.8            | 3,107    | 594.6         | \$55                           | \$118                     | \$826     |
| 26 | Malawi            | Low                              | 0.110            | \$28,219          | \$59,708 | 18.3            | 2,965    | 496.4         | \$57                           | \$120                     | \$996     |
| 27 | Ethiopia          | Low                              | 0.057            | \$29,008          | \$29,104 | 8.6             | 1,986    | 237.4         | \$122                          | \$123                     | \$1,139   |
| 28 | Rwanda            | Low                              | 0.071            | \$30,681          | \$33,818 | 9.6             | 2,216    | 265.0         | \$116                          | \$128                     | \$768     |
| 29 | Cameroon          | Lower middle                     | 0.100            | \$39,111          | \$52,380 | 14.3            | 3,115    | 394.2         | \$99                           | \$133                     | \$741     |
| 30 | Kenya             | Low                              | 0.065            | \$34,280          | \$46,149 | 10.9            | 2,018    | 294.1         | \$117                          | \$157                     | \$883     |
| 31 | Yemen             | Lower middle                     | 0.025            | \$41,823          | \$20,557 | 4.3             | 3,128    | 122.6         | \$341                          | \$168                     | \$719     |
| 32 | Mauritania        | Lower middle                     | 0.042            | \$38,314          | \$28,653 | 5.8             | 2,607    | 164.0         | \$234                          | \$175                     | \$955     |
| 33 | Ghana             | Lower middle                     | 0.063            | \$33,612          | \$33,841 | 6.8             | 1,966    | 189.9         | \$177                          | \$178                     | \$746     |
| 34 | Pakistan          | Lower middle                     | 0.020            | \$40,398          | \$19,912 | 3.8             | 2,748    | 108.0         | \$374                          | \$184                     | \$904     |
| 35 | Madagascar        | Low                              | 0.043            | \$30,438          | \$25,467 | 4.5             | 1,910    | 127.6         | \$239                          | \$200                     | \$1,025   |
| 36 | Eritrea           | Low                              | 0.033            | \$26,867          | \$26,253 | 4.3             | 1,942    | 119.5         | \$225                          | \$220                     | \$1,753   |

IPC CEA Technical Supplement - 19

1  
2  
3  
4  
5  
6  
7  
8  
9  
10  
11  
12  
13  
14  
15  
16  
17  
18  
19  
20  
21  
22  
23  
24  
25  
26  
27  
28  
29  
30  
31  
32  
33  
34  
35  
36  
37  
38  
39  
40  
41  
42  
43  
44  
45  
46  
47  
48  
49  
50  
51  
52  
53  
54  
55  
56  
57  
58  
59  
60

|    |                    |               |       |           |           |      |       |       |          |          |         |
|----|--------------------|---------------|-------|-----------|-----------|------|-------|-------|----------|----------|---------|
| 37 | Botswana           | Upper middle  | 0.080 | \$116,424 | \$173,837 | 26.8 | 1,111 | 734.1 | \$159    | \$237    | \$577   |
| 38 | Swaziland          | Lower middle  | 0.150 | \$58,455  | \$198,389 | 29.1 | 2,230 | 800.0 | \$73     | \$248    | \$632   |
| 39 | Haiti              | Low           | 0.028 | \$30,962  | \$31,577  | 4.4  | 3,128 | 121.7 | \$254    | \$260    | \$869   |
| 40 | South Africa       | Upper middle  | 0.097 | \$93,433  | \$177,476 | 21.5 | 1,150 | 579.7 | \$161    | \$306    | \$582   |
| 41 | India              | Lower middle  | 0.027 | \$44,370  | \$32,889  | 3.7  | 1,255 | 104.6 | \$424    | \$314    | \$733   |
| 42 | Guatemala          | Lower middle  | 0.016 | \$57,311  | \$22,179  | 2.4  | 3,143 | 68.3  | \$839    | \$325    | \$627   |
| 43 | Myanmar            | Low           | 0.026 | \$31,316  | \$28,153  | 2.9  | 1,306 | 83.1  | \$377    | \$339    | \$1,354 |
| 44 | Papua New Guinea   | Lower middle  | 0.018 | \$39,103  | \$25,246  | 2.4  | 2,868 | 70.6  | \$554    | \$358    | \$864   |
| 45 | Gabon              | Upper middle  | 0.060 | \$56,344  | \$92,439  | 9.3  | 1,876 | 251.5 | \$224    | \$368    | \$613   |
| 46 | Iraq               | Upper middle  | 0.009 | \$47,126  | \$25,378  | 1.9  | 2,587 | 55.5  | \$848    | \$457    | \$758   |
| 47 | Namibia            | Upper middle  | 0.038 | \$68,440  | \$201,570 | 15.6 | 1,528 | 416.7 | \$164    | \$484    | \$606   |
| 48 | Cambodia           | Low           | 0.014 | \$38,523  | \$31,223  | 1.9  | 1,341 | 53.9  | \$715    | \$579    | \$739   |
| 49 | Nepal              | Low           | 0.010 | \$30,887  | \$29,027  | 1.4  | 1,135 | 39.2  | \$788    | \$740    | \$883   |
| 50 | Morocco            | Lower middle  | 0.006 | \$54,334  | \$40,545  | 1.9  | 1,623 | 54.5  | \$997    | \$744    | \$650   |
| 51 | Bangladesh         | Low           | 0.007 | \$32,639  | \$28,448  | 0.9  | 1,076 | 25.8  | \$1,264  | \$1,101  | \$1,046 |
| 52 | Algeria            | Upper middle  | 0.008 | \$80,074  | \$55,887  | 1.4  | 1,304 | 40.8  | \$1,965  | \$1,371  | \$606   |
| 53 | Uzbekistan         | Lower middle  | 0.006 | \$43,037  | \$25,245  | 0.6  | 2,352 | 18.1  | \$2,379  | \$1,395  | \$717   |
| 54 | Brazil             | Upper middle  | 0.004 | \$34,045  | \$31,218  | 0.6  | 1,385 | 18.1  | \$1,881  | \$1,725  | \$581   |
| 55 | Thailand           | Upper middle  | 0.005 | \$79,636  | \$91,299  | 1.8  | 455   | 46.5  | \$1,711  | \$1,961  | \$622   |
| 56 | Ukraine            | Lower middle  | 0.006 | \$74,578  | \$68,634  | 1.2  | 623   | 32.8  | \$2,272  | \$2,091  | \$600   |
| 57 | Indonesia          | Lower middle  | 0.008 | \$51,988  | \$43,696  | 0.7  | 814   | 20.5  | \$2,540  | \$2,135  | \$793   |
| 58 | Bolivia            | Lower middle  | 0.010 | \$53,963  | \$30,445  | 0.4  | 2,015 | 13.1  | \$4,105  | \$2,316  | \$668   |
| 59 | Vietnam            | Lower middle  | 0.005 | \$43,303  | \$39,035  | 0.6  | 828   | 16.7  | \$2,597  | \$2,341  | \$664   |
| 60 | Peru               | Upper middle  | 0.004 | \$82,397  | \$53,509  | 0.6  | 1,497 | 17.8  | \$4,636  | \$3,011  | \$613   |
| 61 | Philippines        | Lower middle  | 0.003 | \$48,596  | \$37,382  | 0.3  | 1,289 | 10.8  | \$4,520  | \$3,477  | \$724   |
| 62 | Colombia           | Upper middle  | 0.003 | \$124,448 | \$77,859  | 0.6  | 1,419 | 18.7  | \$6,643  | \$4,156  | \$598   |
| 63 | Russian Federation | High: nonOECD | 0.007 | \$156,317 | \$131,095 | 1.1  | 735   | 30.2  | \$5,179  | \$4,343  | \$579   |
| 64 | Argentina          | Upper middle  | 0.003 | \$119,219 | \$85,212  | 0.6  | 1,097 | 16.6  | \$7,166  | \$5,122  | \$577   |
| 65 | Malaysia           | Upper middle  | 0.004 | \$118,529 | \$91,339  | 0.6  | 930   | 16.5  | \$7,199  | \$5,548  | \$591   |
| 66 | Turkey             | Upper middle  | 0.001 | \$116,707 | \$55,139  | 0.1  | 1,784 | 5.9   | \$19,647 | \$9,283  | \$582   |
| 67 | China              | Upper middle  | 0.001 | \$66,612  | \$59,793  | 0.1  | 486   | 4.4   | \$15,010 | \$13,474 | \$638   |
| 68 | Mexico             | Upper middle  | 0.003 | \$120,196 | \$127,833 | 0.3  | 0     | 8.7   | \$13,799 | \$14,675 | \$583   |

**Tech. Suppl. - Table 10.** Estimates of rates of care seeking for malaria.

| <u>Source</u>                                                                                                                                                                                                                                                                                | <u>Location</u>                                                  | <u>Care-seeking rate</u>                                                                                                        |
|----------------------------------------------------------------------------------------------------------------------------------------------------------------------------------------------------------------------------------------------------------------------------------------------|------------------------------------------------------------------|---------------------------------------------------------------------------------------------------------------------------------|
| <u>ScientificWorldJournal. 2003 Aug 19;3:721-30. Prevalence of childhood illnesses and care-seeking practices in rural Uganda. Mbonye AK.</u>                                                                                                                                                | <u>Rural Uganda</u>                                              | <u>44.7%</u>                                                                                                                    |
| <u>Malar J. 2010 Nov 22;9:333. From fever to anti-malarial: the treatment-seeking process in rural Senegal. Smith LA, Bruce J, Gueye L, Helou A, Diallo R, Gueye B, Jones C, Webster J.</u>                                                                                                  | <u>Rural Senegal</u>                                             | <u>61.6%</u>                                                                                                                    |
| <u>BMC Pub Health. 2008. Obstacles to prompt and effective malaria treatment lead to low community-coverage in two rural districts of Tanzania. Hetzel MW, Obrist B, Lengeler C, Msechu JJ, Nathan R, Dillip A, Makemba AM, Mshana C, Schulze A, Mshinda H.</u>                              | <u>South-eastern Tanzania (rural, high malaria transmission)</u> | <u>76.3% (caretakers bringing children to HF); 56.1% (adults attending health facility for own symptoms)</u>                    |
| <u>Malar J. 2011 Oct 31;10:327. Monitoring fever treatment behaviour and equitable access to effective medicines in the context of initiatives to improve ACT access: baseline results and implications for programming in six African countries. Littrell M, Gatakaa H, Evance I, et al</u> | <u>Benin, DRC, Madagascar, Nigeria, Uganda, Zambia</u>           | <u>Treatment-seeking outside of home: Benin - 50.3%; DRC - 73%; Madagascar - 78%; Nigeria - 73%; Uganda - 72%; Zambia - 77%</u> |
| <u>Malar J. 2010 Dec 30;9:377. Factors affecting treatment-seeking for febrile illness in a malaria endemic block in Boudh district, Orissa, India: policy implications for malaria control. Das A, Ravindran TS.</u>                                                                        | <u>Orissa, India (high malaria transmission area)</u>            | <u>Treatment-seeking: 94%</u>                                                                                                   |
| <u>Malar J. 2010 Jun 15;9:163. Improvements in access to malaria treatment in Tanzania following community, retail sector and health facility interventions -- a user perspective. Alba S, Dillip A, Hetzel MW, et al</u>                                                                    | <u>Ifakara, Tanzania</u>                                         | <u>Health facility attendance:52%</u>                                                                                           |

Formatted Table

1  
2  
3  
4  
5  
6  
7  
8  
9  
10  
11  
12  
13  
14  
15  
16  
17  
18  
19  
20  
21  
22  
23  
24  
25  
26  
27  
28  
29  
30  
31  
32  
33  
34  
35  
36  
37  
38  
39  
40  
41  
42  
43  
44  
45  
46  
47  
48  
49  
50  
51  
52  
53  
54  
55  
56  
57  
58  
59  
60

Tech-Suppl - Figure 1.

For peer review only

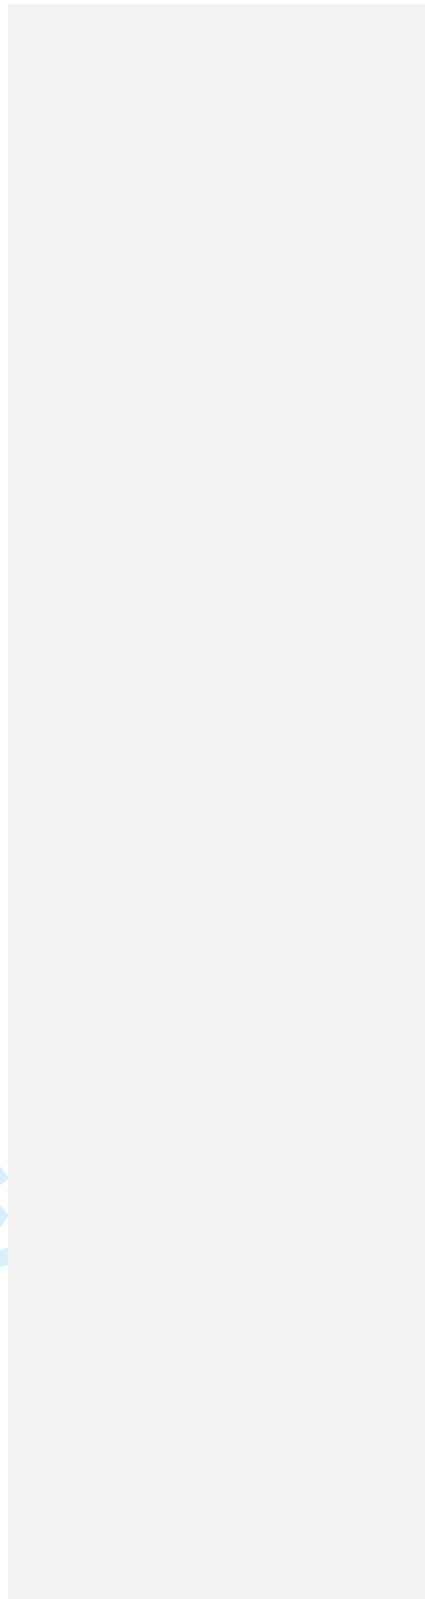

IPC CEA Technical Supplement - 22



1  
2  
3  
4  
5  
6  
7  
8  
9  
10  
11  
12  
13  
14  
15  
16  
17  
18  
19  
20  
21  
22  
23  
24  
25  
26  
27  
28  
29  
30  
31  
32  
33  
34  
35  
36  
37  
38  
39  
40  
41  
42  
43  
44  
45  
46  
47  
48  
49  
50  
51  
52  
53  
54  
55  
56  
57  
58  
59  
60

Tech-Suppl - Figure 2.

For peer review only

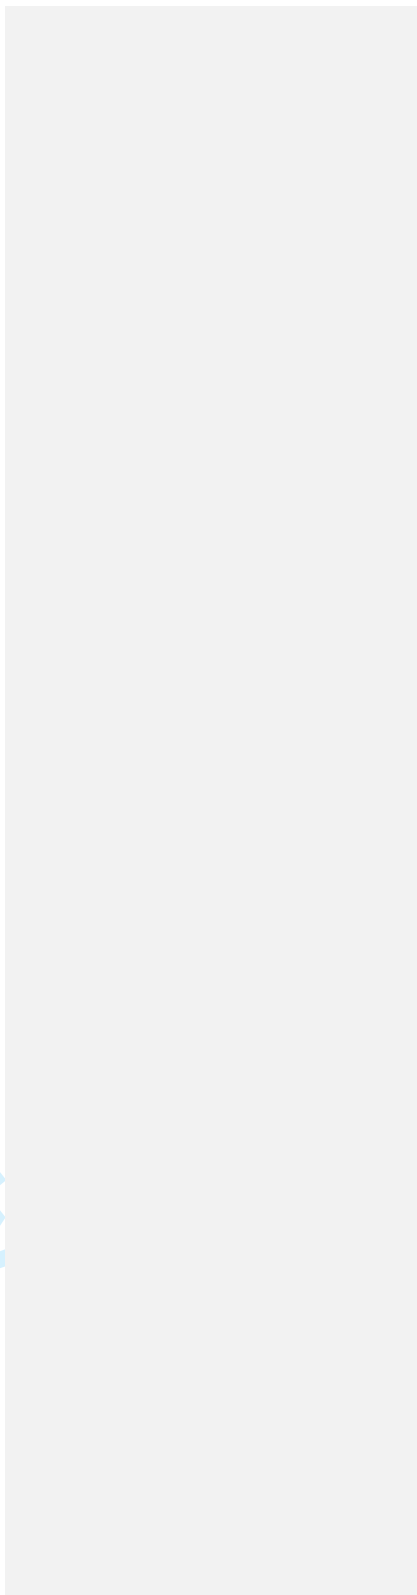

IPC CEA Technical Supplement - 23

1  
2  
3  
4  
5  
6  
7  
8  
9  
10  
11  
12  
13  
14  
15  
16  
17  
18  
19  
20  
21  
22  
23  
24  
25  
26  
27  
28  
29  
30  
31  
32  
33  
34  
35  
36  
37  
38  
39  
40  
41  
42  
43  
44  
45  
46  
47  
48  
49  
50  
51  
52  
53  
54  
55  
56  
57  
58  
59  
60

Tech-Suppl - Figure 3.

For peer review only

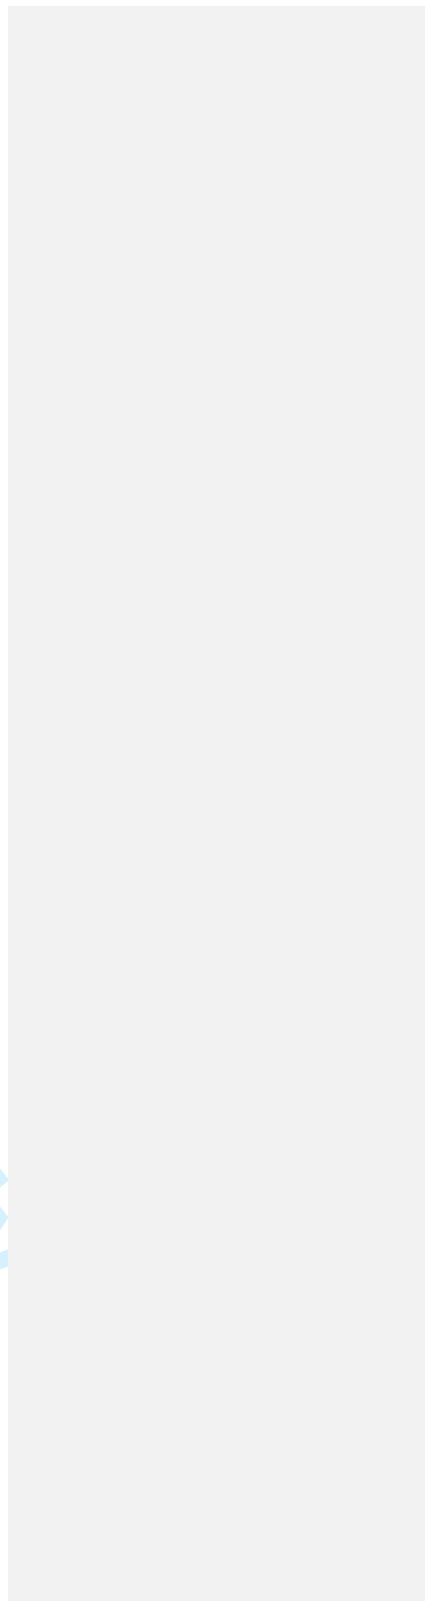

IPC CEA Technical Supplement - 24

1  
2  
3  
4  
5  
6  
7  
8  
9  
10  
11  
12  
13  
14  
15  
16  
17  
18  
19  
20  
21  
22  
23  
24  
25  
26  
27  
28  
29  
30  
31  
32  
33  
34  
35  
36  
37  
38  
39  
40  
41  
42  
43  
44  
45  
46  
47  
48  
49  
50  
51  
52  
53  
54  
55  
56  
57  
58  
59  
60

Tech. Suppl. - Figure 4.

For peer review only

IPC CEA Technical Supplement - 25

1  
2  
3  
4  
5  
6  
7  
8  
9  
10  
11  
12  
13  
14  
15  
16  
17  
18  
19  
20  
21  
22  
23  
24  
25  
26  
27  
28  
29  
30  
31  
32  
33  
34  
35  
36  
37  
38  
39  
40  
41  
42  
43  
44  
45  
46  
47  
48  
49  
50  
51  
52  
53  
54  
55  
56  
57  
58  
59  
60

Tech Suppl. - Figure 5.

For peer review only

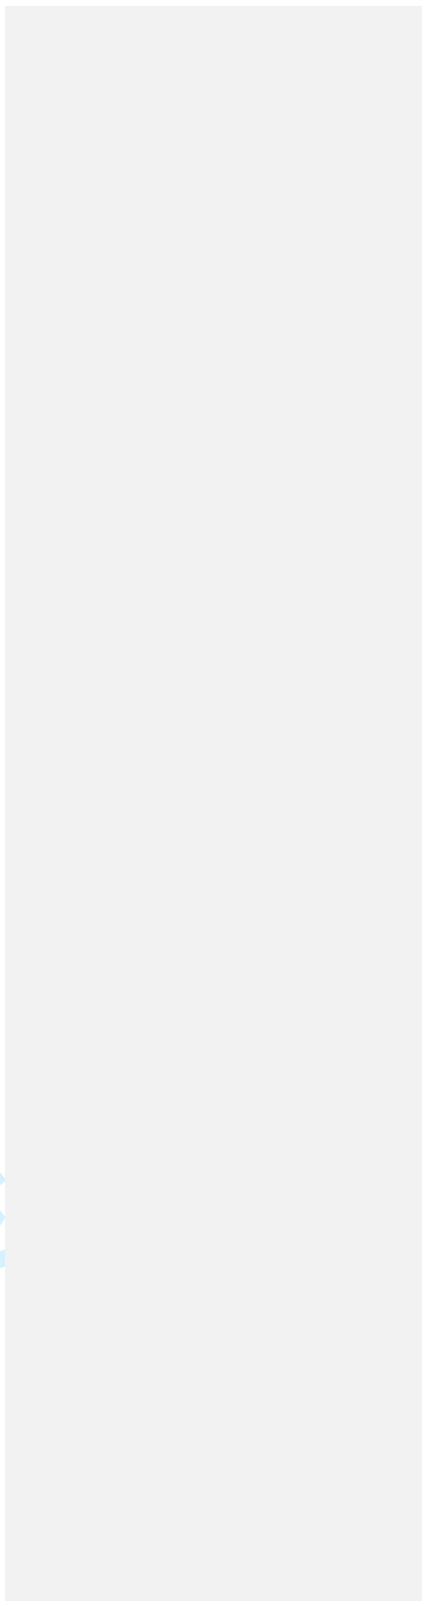

IPC CEA Technical Supplement - 26

1  
2  
3  
4  
5  
6  
7  
8  
9  
10  
11  
12  
13  
14  
15  
16  
17  
18  
19  
20  
21  
22  
23  
24  
25  
26  
27  
28  
29  
30  
31  
32  
33  
34  
35  
36  
37  
38  
39  
40  
41  
42  
43  
44  
45  
46  
47  
48  
49  
50  
51  
52  
53  
54  
55  
56  
57  
58  
59  
60

### Projection of costs and outcomes to 30 years

We projected cumulative costs and outcomes of the IPC campaign in Kenya for 30 years, assuming an initial campaign and a second campaign three years later (Figure 6). Costs and benefits of the two campaigns were added and reflect the lower effectiveness of the second campaign. The large rise in costs in year 4 reflects the initiation of the second campaign, and the gradual increase in cumulative costs over time reflects the costs of additional HIV treatment. The steadily rising cumulative net DALYs averted reflects the averted morbidity during the period of bed net and water filter efficacy, but is largely determined by the distribution of saved life years due to averted mortality from all three diseases during the period of IPC benefit. Distribution of benefits were made according to the following assumptions:

- HIV deaths would occur on average 15 years after infection.
- Assumes those detected are all put on ART at year of campaign.
- Earlier and more ART die to earlier detection distributed over 15 and 20 years respectively.
- HIV mortality prevention in secondary partners starts on average in year 20 after the campaign and is distributed over 20 years.
- 50% of prevented HIV mortality occurred in the index patient
- Life-expectancy at the time of the campaign was 60 years for averted mortality in malaria and diarrhea patients.
- Malaria and diarrhea morbidity reduction is confined to the campaign itself.

Tech Suppl. - Figure 6.

## References

1. Kahn JG, Marseille E, Auvert B. Cost-effectiveness of male circumcision for HIV prevention in a South African setting. *PLoS medicine* 2006;3(12):e517.
2. Fischer Walker CL, Perin J, Aryee MJ, Boschi-Pinto C, Black RE. Diarrhea incidence in low- and middle-income countries in 1990 and 2010: a systematic review. *BMC Public Health* 2012;12:220.
3. UNICEF. The State of the World's Children 2011. Table 6: Demographic Indicators: under 5 population (2010), 2011.
4. UN Department of Economic and Social Affairs - Population Division. World Population Prospects, 2010 Revision, 2010.
5. The World Bank. Population, total.
6. Kahn JG, Muraguri N, Harris B, Lugada E, Clasen T, Grabowsky M, et al. Integrated HIV testing, malaria, and diarrhea prevention campaign in Kenya: modeled health impact and cost-effectiveness. *PloS one* 2012;7(2):e31316.
7. ICF International. MEASURE DHS STATcompiler, 2012.

1  
2  
3  
4  
5  
6  
7  
8  
9  
10  
11  
12  
13  
14  
15  
16  
17  
18  
19  
20  
21  
22  
23  
24  
25  
26  
27  
28  
29  
30  
31  
32  
33  
34  
35  
36  
37  
38  
39  
40  
41  
42  
43  
44  
45  
46  
47  
48  
49  
50  
51  
52  
53  
54  
55  
56  
57  
58  
59  
60

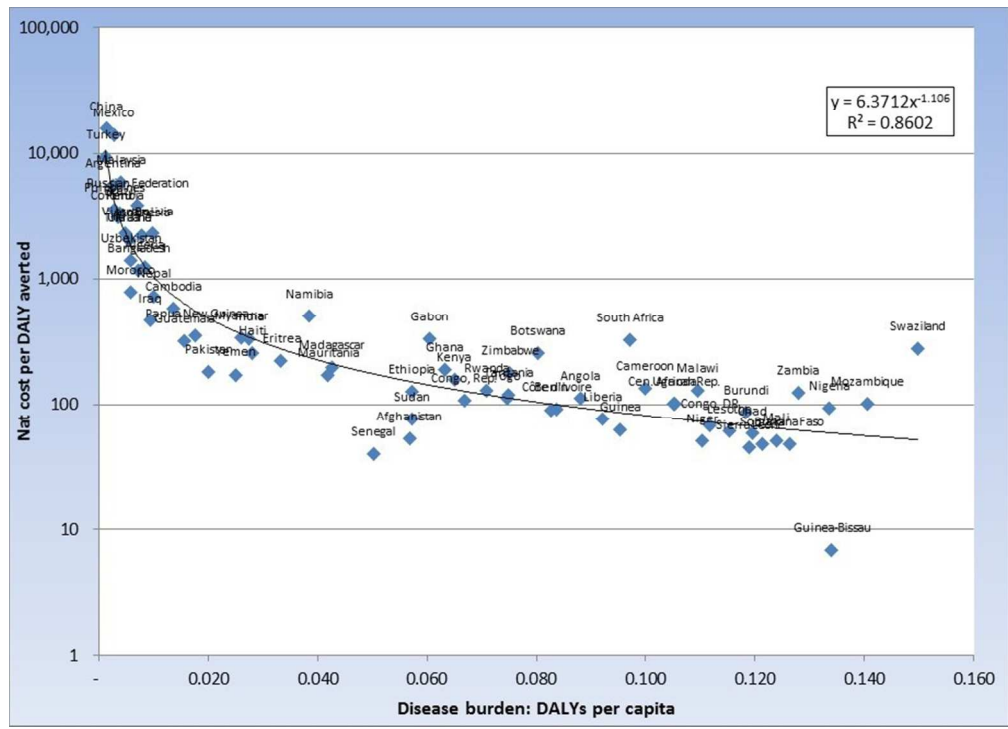

1  
2  
3  
4  
5  
6  
7  
8  
9  
10  
11  
12  
13  
14  
15  
16  
17  
18  
19  
20  
21  
22  
23  
24  
25  
26  
27  
28  
29  
30  
31  
32  
33  
34  
35  
36  
37  
38  
39  
40  
41  
42  
43  
44  
45  
46  
47  
48  
49  
50  
51  
52  
53  
54  
55  
56  
57  
58  
59  
60

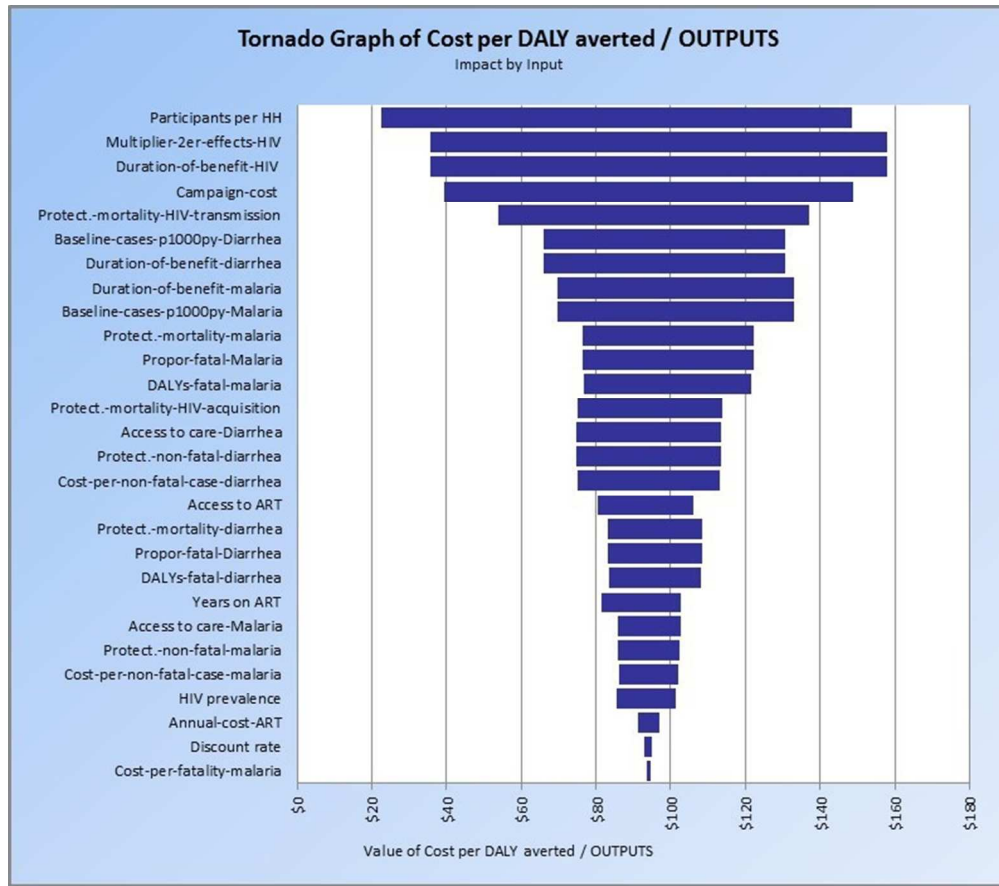

168x148mm (120 x 120 DPI)

For peer review only



1  
2  
3  
4  
5  
6  
7  
8  
9  
10  
11  
12  
13  
14  
15  
16  
17  
18  
19  
20  
21  
22  
23  
24  
25  
26  
27  
28  
29  
30  
31  
32  
33  
34  
35  
36  
37  
38  
39  
40  
41  
42  
43  
44  
45  
46  
47  
48  
49  
50  
51  
52  
53  
54  
55  
56  
57  
58  
59  
60

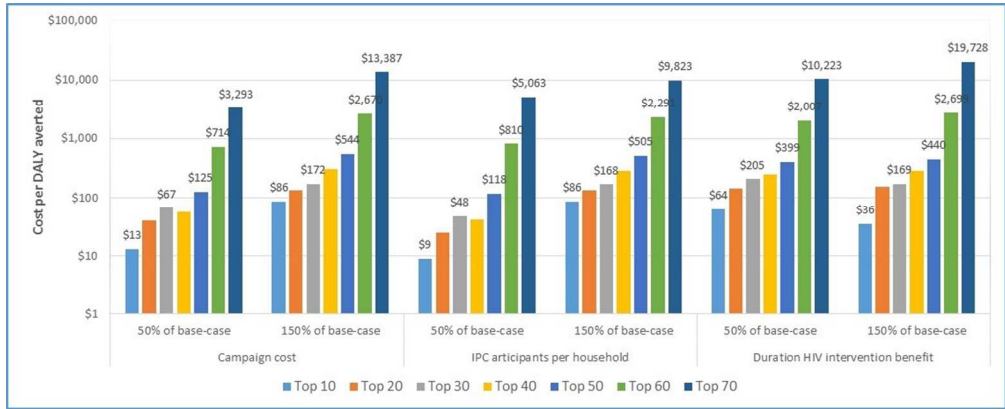

240x98mm (120 x 120 DPI)

Peer review only

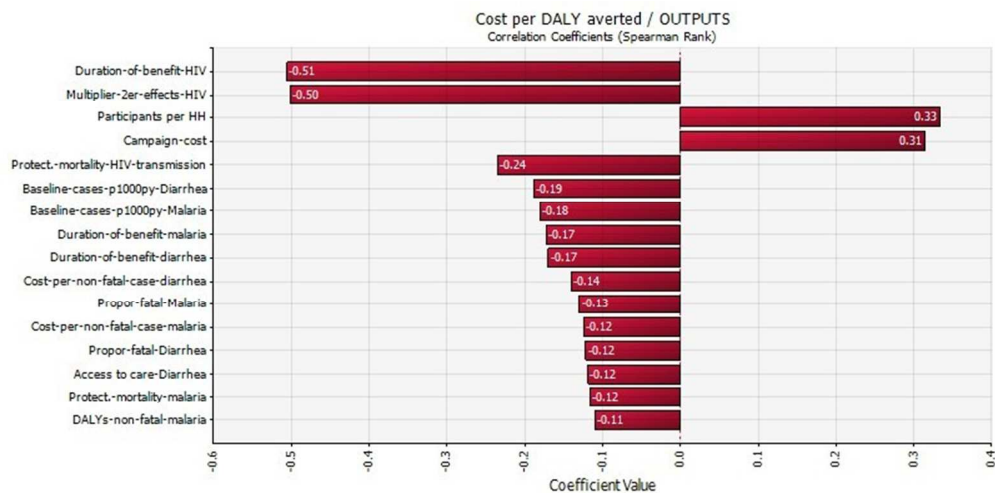

169x84mm (120 x 120 DPI)

Peer review only

1  
2  
3  
4  
5  
6  
7  
8  
9  
10  
11  
12  
13  
14  
15  
16  
17  
18  
19  
20  
21  
22  
23  
24  
25  
26  
27  
28  
29  
30  
31  
32  
33  
34  
35  
36  
37  
38  
39  
40  
41  
42  
43  
44  
45  
46  
47  
48  
49  
50  
51  
52  
53  
54  
55  
56  
57  
58  
59  
60

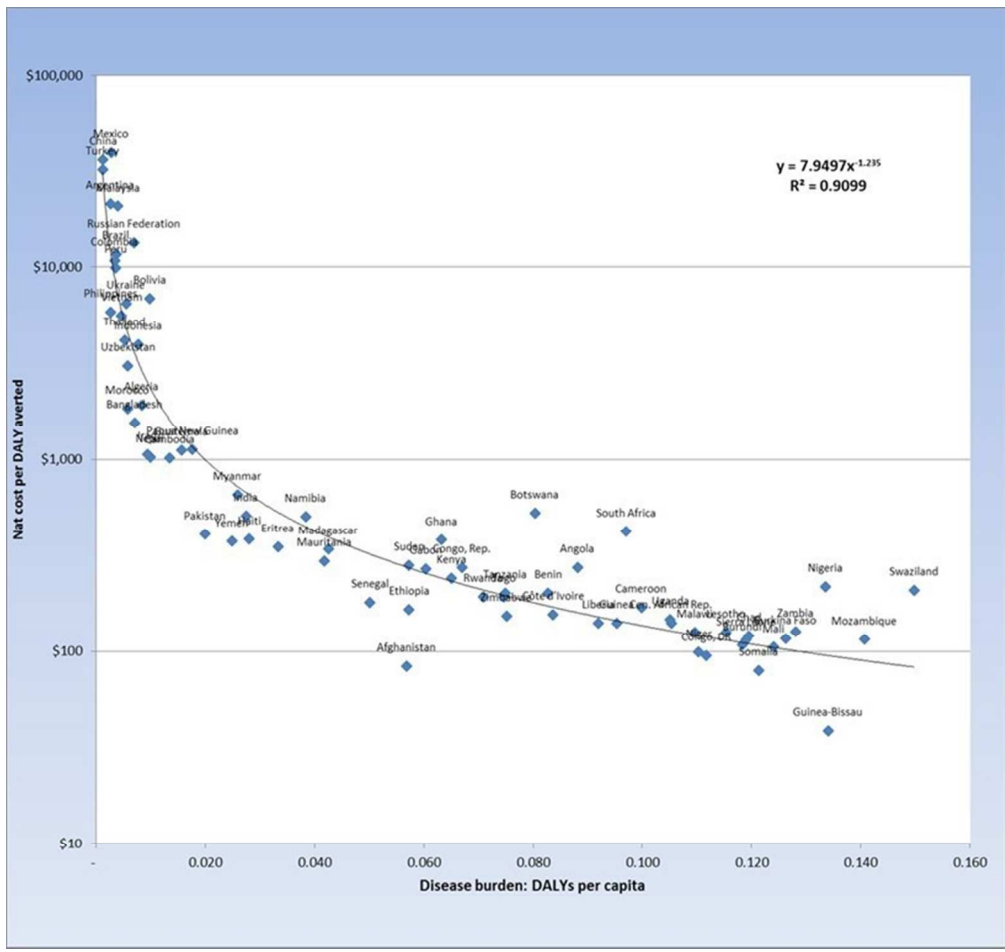

172x161mm (120 x 120 DPI)

only

1  
2  
3  
4  
5  
6  
7  
8  
9  
10  
11  
12  
13  
14  
15  
16  
17  
18  
19  
20  
21  
22  
23  
24  
25  
26  
27  
28  
29  
30  
31  
32  
33  
34  
35  
36  
37  
38  
39  
40  
41  
42  
43  
44  
45  
46  
47  
48  
49  
50  
51  
52  
53  
54  
55  
56  
57  
58  
59  
60

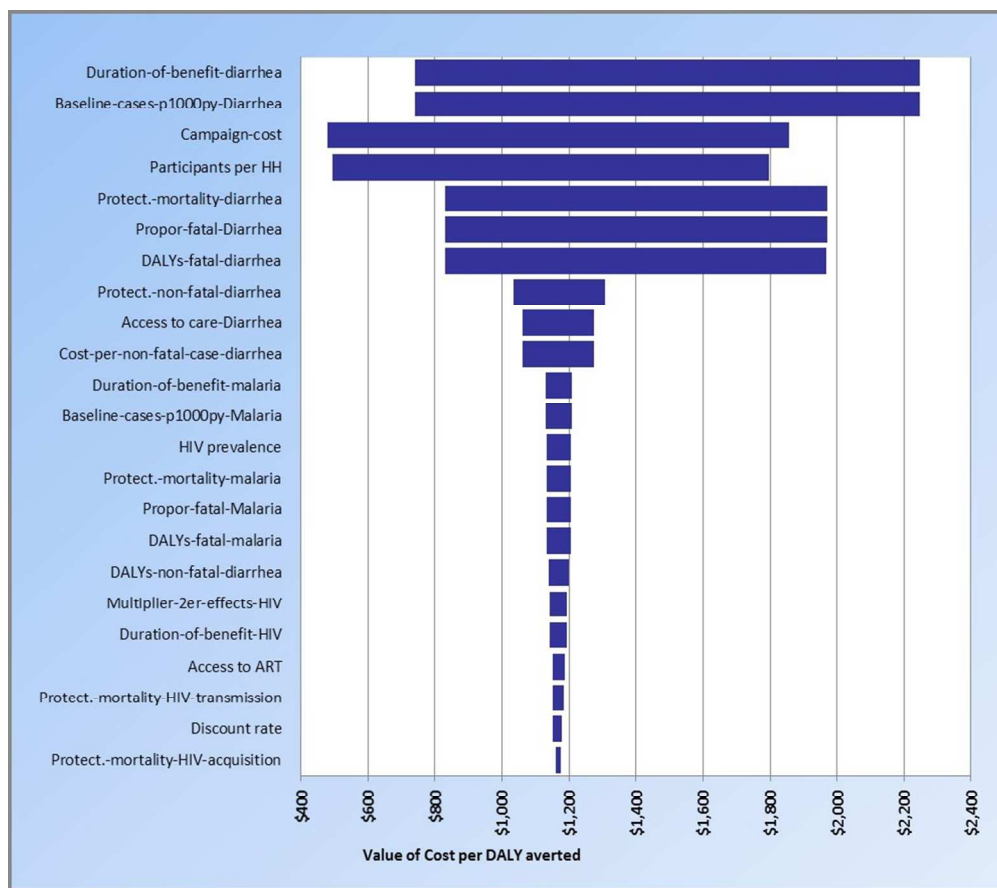

168x148mm (150 x 150 DPI)

only

1  
2  
3  
4  
5  
6  
7  
8  
9  
10  
11  
12  
13  
14  
15  
16  
17  
18  
19  
20  
21  
22  
23  
24  
25  
26  
27  
28  
29  
30  
31  
32  
33  
34  
35  
36  
37  
38  
39  
40  
41  
42  
43  
44  
45  
46  
47  
48  
49  
50  
51  
52  
53  
54  
55  
56  
57  
58  
59  
60

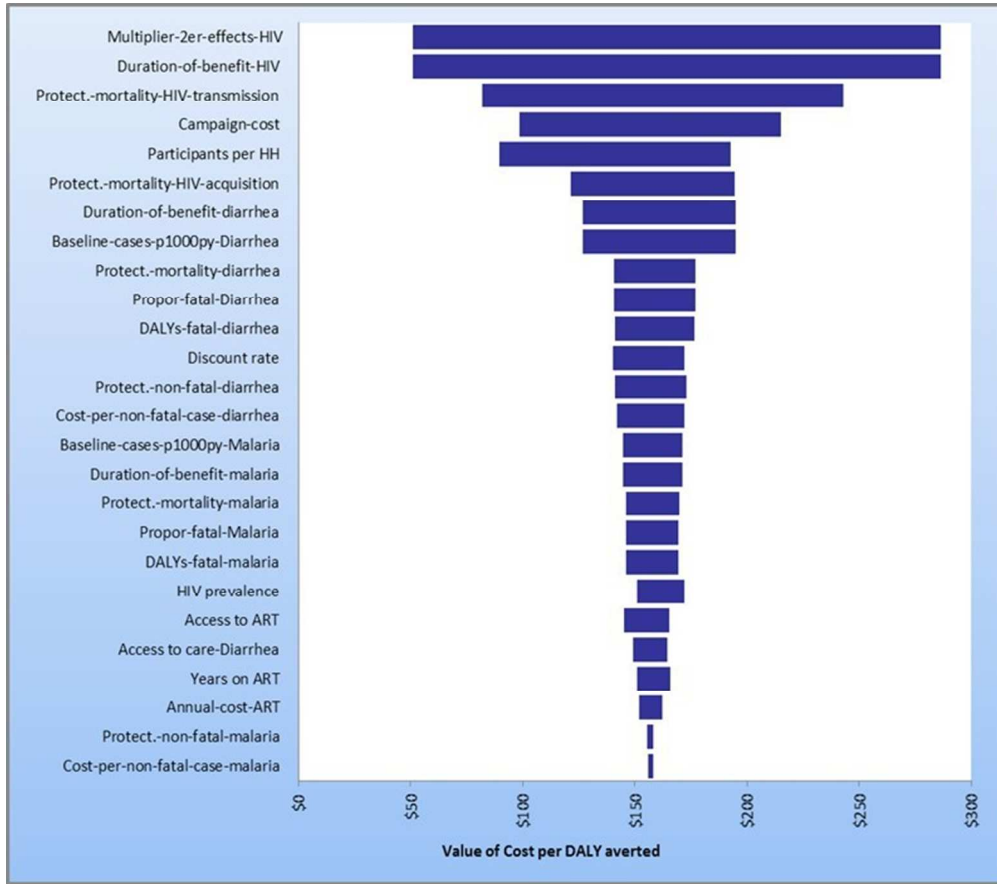

168x148mm (120 x 120 DPI)

only

1  
2  
3  
4  
5  
6  
7  
8  
9  
10  
11  
12  
13  
14  
15  
16  
17  
18  
19  
20  
21  
22  
23  
24  
25  
26  
27  
28  
29  
30  
31  
32  
33  
34  
35  
36  
37  
38  
39  
40  
41  
42  
43  
44  
45  
46  
47  
48  
49  
50  
51  
52  
53  
54  
55  
56  
57  
58  
59  
60

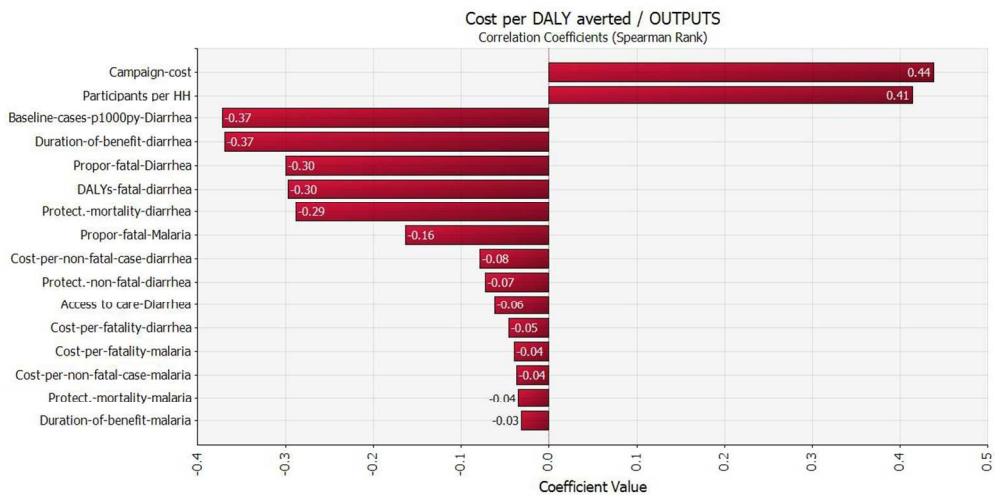

338x169mm (96 x 96 DPI)

Peer review only

1  
2  
3  
4  
5  
6  
7  
8  
9  
10  
11  
12  
13  
14  
15  
16  
17  
18  
19  
20  
21  
22  
23  
24  
25  
26  
27  
28  
29  
30  
31  
32  
33  
34  
35  
36  
37  
38  
39  
40  
41  
42  
43  
44  
45  
46  
47  
48  
49  
50  
51  
52  
53  
54  
55  
56  
57  
58  
59  
60

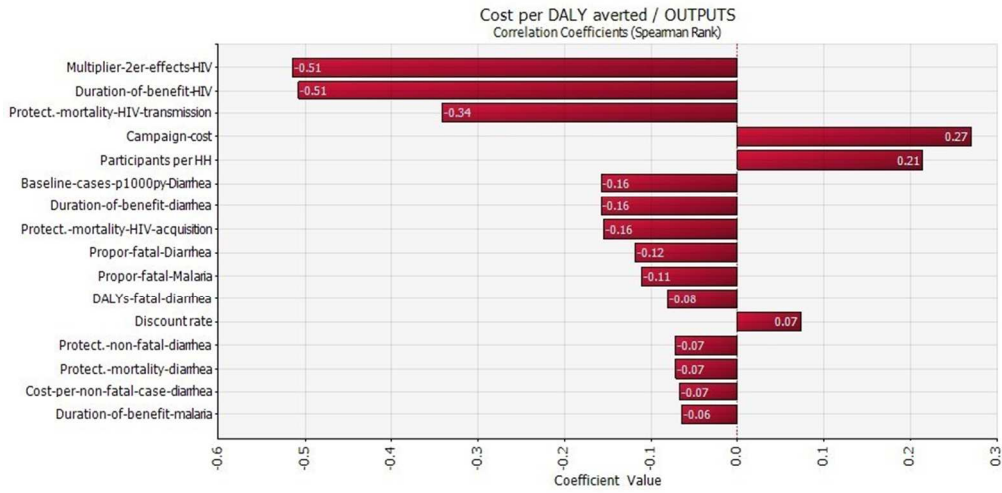

195x97mm (120 x 120 DPI)

Peer review only

1  
2  
3  
4  
5  
6  
7  
8  
9  
10  
11  
12  
13  
14  
15  
16  
17  
18  
19  
20  
21  
22  
23  
24  
25  
26  
27  
28  
29  
30  
31  
32  
33  
34  
35  
36  
37  
38  
39  
40  
41  
42  
43  
44  
45  
46  
47  
48  
49  
50  
51  
52  
53  
54  
55  
56  
57  
58  
59  
60

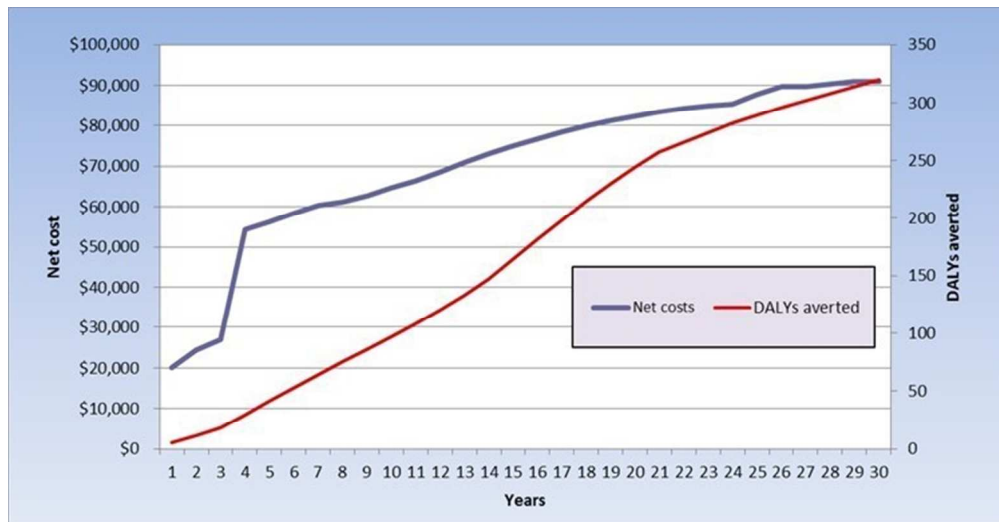

158x82mm (120 x 120 DPI)

For peer review only



## Technical Supplement

### Reduction in risk for malaria and HIV between first and second campaign

In this analysis, to explore sustainability, we examine both an initial campaign and a follow-up campaign three years later. Thus, we need to estimate the health benefit realized by the follow-up campaign, taking into account the stability of disease reduction offered initially. The more that initial protection decays over six years, and thus the larger the disease risk in years 4-6, the greater will be the benefit of a campaign at three years. This decay is a function of the physical durability of the commodities distributed, as well as maintenance of safer behaviors. The dynamics vary by disease.

For malaria we assume 75% as much disease incidence at years 4-6 (absent a 2<sup>nd</sup> campaign) as baseline incidence. In other words, we assume that full set of LLIN distributed in the *initial* campaign, with no follow-up campaign, would have half as much community benefit in years 4-6 as in years 1-3. Many LLIN will remain in place, and the insecticide impregnation itself is stable for close to 10 years. Thus, the 50% incidence drop expected with LLIN in years 1-3 will decrease but not disappear in the second 3 years. However, the second round of LLIN are likely to have a relative effectiveness less than 50%, because the best LLIN users are already protected. Thus we decrease the effectiveness from 50% to 33% (i.e., from 75% of baseline incidence to 50% of baseline incidence). In effect, the 2<sup>nd</sup> campaign is like a booster shot that returns effectiveness to its original level. In sum, the overall benefit of the second campaign is reduced by half -- in first campaign it was 100% of baseline incidence to 50%, and in the second campaign from 75% of baseline incidence to 50%.

We note that these estimates are assembled from isolated data (e.g., LLIN physical durability) combined with a logical framework and best guesses. Nonetheless, we believe that the conclusion – 50% as much benefit for a second campaign – is plausible, and is a far more realistic assumption than full benefit. Our approach is conservative regarding the second campaign – if the specified durability of effect of the LLIN is larger than in reality, we would be *underestimating* the benefit of this campaign. And our estimate of the combined effect of two sequential campaigns is robust. Low estimates of durability understate benefits of the first campaign and overstate benefits of the second campaign, which represent offsetting errors. Conversely, high estimates of durability overstate the value of the first campaign and understate second campaign benefits, again offsetting.

For diarrhea, we assume no filter benefit after three years. The filters are expected to last in good function only three years. Thus, the filter component of the second campaign is just as effective as for the first campaign.

For HIV, effects on DALYs and cost depend heavily on undiagnosed HIV prevalence. The first campaign detects almost all HIV-infected individuals. Thus, the effects of the second campaign depend mainly on the impact of 3 years of HIV incidence on (predominantly undiagnosed) HIV prevalence. This incidence has not been measured, but can be estimated from HIV prevalence using simple epidemic dynamics. <sup>1</sup>Steady-state (pre-ART) annual incidence is about 1/10th of prevalence (slightly more if prevalence above 10%, due to reduction in # of susceptible). So, if initial prevalence was 5%, then annual incidence is about 0.5%, and prevalence at 3 years will be about 1.5%.

Incidence and thus prevalence could be even lower if ART reduces community viral load and also if VCT for HIV+ has substantial behavioral benefits. They could be higher if the first campaign selectively missed HIV+, e.g. they chose not to participate or were away in urban areas.

## Diarrhea: estimation of average cases per PY and annual cases

Using data on the number of episodes per year in children under 5<sup>2</sup>, we estimated the average number of episodes (cases) per person-year in the overall population by weighting the incidence by the percentage of the population under five<sup>3</sup> and over five. We then adjusted the incidence in the >5 year-old population by the ratio of the country <5 incidence to the average global <5 incidence<sup>4</sup>. Multiplying each estimate by the total population<sup>5</sup> provided estimates of the number of cases of diarrhea in each country.

**Explanation for difference between results reported in earlier analysis (Kahn, 2012) and current article.** The earlier evaluation of the Integrated Prevention Campaign in Western Province, Kenya found that the 2008 campaign saved \$16,015 and averted 442 DALYs per 1,000 campaign participants.<sup>6</sup> The current article finds a highly favorable cost-effectiveness ratio of \$157 per DALY averted (net cost of \$ 46,149 and 294 DALYs averted per 1,000 campaign participants), but no cost savings in the base-case analysis for Kenya. The difference can be attributed to the aggregate effect of changes in input parameter values of two types: (a) **Geographic shift from Western Province to Kenya in general.** The earlier analysis calculated the number of beneficiaries per household based on household size data from the campaign communities, 7.7 persons. In the current article, we used the lower national figure of 4.6, assumed to reflect fewer children per household<sup>7</sup>. The total benefits of the malaria and diarrheal disease interventions fell accordingly. The current article also uses lower figures for malaria and diarrheal annual incidence, 0.057 and 0.542 per individual for Kenya, respectively, versus 0.30 and 1.75 as found in the 2008 survey in Western Province. (b) **Refined data on care seeking.** The 2012 article assumed 100% care-seeking for diarrhea and malaria. Subsequently, we obtained data on care-seeking patterns, though not specific to Kenya. The current article thus assumes 67.8% for diarrheal diseases and 68.4% for malaria. In addition, we adjusted two cost inputs. The campaign cost was updated to include a recent water filter maintenance program to \$34,280 from \$32,000 in the earlier paper. Based on a more complete review of the relevant literature including new findings on life expectancy for people receiving antiretroviral therapy (ART), we also increased the estimated lifetime cost of ART, from \$5,092 to \$12,213.

**Tech. Suppl. - Table 1:** Summary costs and cost-effectiveness results per 1,000 IPC participants for 70 countries ordered from most to least cost-effective. The grey highlighted cells indicate cost-effectiveness ratios less favorable than investment in ART. Results shown are for the second and subsequent 3-year campaigns.

|     | Country           | World Bank income classification | DALYs per capita | Costs    |           | Disease averted |          | DALYs averted | Cost-effectiveness (CE)        |                           |           |
|-----|-------------------|----------------------------------|------------------|----------|-----------|-----------------|----------|---------------|--------------------------------|---------------------------|-----------|
|     |                   |                                  |                  | IPC cost | Net cost  | Deaths          | Episodes |               | Campaign cost per DALY averted | Net cost per DALY averted | CE of ART |
| 131 | Guinea-Bissau     | Low                              | 0.134            | \$29,459 | \$16,675  | 26.9            | 5,465.3  | 754.3         | \$22                           | \$39                      | \$1,005   |
| 132 | Somalia           | Low                              | 0.121            | \$26,015 | \$23,643  | 11.6            | 2,055.1  | 325.2         | \$73                           | \$80                      | \$768     |
| 133 | Afghanistan       | Low                              | 0.057            | \$28,770 | \$22,700  | 12.2            | 2,380.6  | 342.0         | \$66                           | \$84                      | \$764     |
| 134 | Congo, DR         | Low                              | 0.112            | \$24,637 | \$24,258  | 9.3             | 1,851.9  | 259.2         | \$94                           | \$95                      | \$819     |
| 135 | Niger             | Low                              | 0.110            | \$28,081 | \$24,250  | 10.0            | 2,648.0  | 282.6         | \$86                           | \$99                      | \$1,535   |
| 136 | Mali              | Low                              | 0.124            | \$29,459 | \$25,298  | 10.0            | 2,312.1  | 280.1         | \$90                           | \$105                     | \$1,095   |
| 137 | Burundi           | Low                              | 0.118            | \$26,015 | \$27,699  | 8.7             | 1,256.5  | 239.8         | \$116                          | \$108                     | \$888     |
| 138 | Sierra Leone      | Low                              | 0.119            | \$31,525 | \$24,508  | 9.8             | 2,142.5  | 274.1         | \$89                           | \$115                     | \$935     |
| 139 | Mozambique        | Low                              | 0.141            | \$30,147 | \$36,613  | 9.7             | 1,975.5  | 260.0         | \$141                          | \$116                     | \$807     |
| 140 | Burkina Faso      | Low                              | 0.126            | \$31,525 | \$26,076  | 9.6             | 2,153.3  | 270.2         | \$96                           | \$117                     | \$738     |
| 141 | Chad              | Low                              | 0.120            | \$35,658 | \$27,805  | 10.6            | 2,258.2  | 294.9         | \$94                           | \$121                     | \$928     |
| 142 | Lesotho           | Lower middle                     | 0.115            | \$35,658 | \$37,171  | 11.7            | 919.3    | 283.6         | \$131                          | \$126                     | \$1,493   |
| 143 | Malawi            | Low                              | 0.110            | \$28,081 | \$36,299  | 8.6             | 1,532.3  | 221.8         | \$164                          | \$127                     | \$703     |
| 144 | Zambia            | Lower middle                     | 0.128            | \$33,591 | \$41,222  | 10.1            | 1,660.1  | 263.4         | \$156                          | \$128                     | \$1,025   |
| 145 | Liberia           | Low                              | 0.092            | \$26,704 | \$25,199  | 6.8             | 1,762.6  | 190.4         | \$132                          | \$140                     | \$987     |
| 146 | Guinea            | Low                              | 0.095            | \$29,459 | \$25,199  | 7.4             | 2,175.8  | 208.8         | \$121                          | \$141                     | \$910     |
| 147 | Cen. African Rep. | Low                              | 0.105            | \$27,392 | \$29,606  | 7.1             | 1,443.6  | 194.2         | \$152                          | \$141                     | \$801     |
| 148 | Uganda            | Low                              | 0.105            | \$31,525 | \$31,104  | 7.9             | 1,841.7  | 214.8         | \$145                          | \$147                     | \$747     |
| 149 | Zimbabwe          | Low                              | 0.075            | \$25,326 | \$40,453  | 6.9             | 905.4    | 165.8         | \$244                          | \$153                     | \$1,109   |
| 150 | Côte d'Ivoire     | Lower middle                     | 0.084            | \$33,591 | \$31,110  | 7.8             | 2,009.7  | 214.9         | \$145                          | \$156                     | \$1,230   |
| 151 | Ethiopia          | Low                              | 0.057            | \$30,147 | \$28,881  | 6.5             | 1,128.0  | 181.8         | \$159                          | \$166                     | \$749     |
| 152 | Cameroon          | Lower middle                     | 0.100            | \$37,724 | \$39,507  | 8.1             | 1,620.0  | 223.1         | \$177                          | \$169                     | \$756     |
| 153 | Senegal           | Lower middle                     | 0.050            | \$34,969 | \$22,535  | 6.8             | 2,951.7  | 193.6         | \$116                          | \$181                     | \$864     |
| 154 | Togo              | Low                              | 0.075            | \$29,459 | \$28,877  | 5.5             | 1,466.8  | 153.3         | \$188                          | \$192                     | \$674     |
| 155 | Rwanda            | Low                              | 0.071            | \$31,525 | \$30,620  | 5.9             | 1,248.9  | 163.9         | \$187                          | \$192                     | \$935     |
| 156 | Tanzania          | Low                              | 0.075            | \$33,591 | \$32,273  | 6.1             | 1,636.6  | 167.4         | \$193                          | \$201                     | \$826     |
| 157 | Benin             | Low                              | 0.083            | \$33,591 | \$28,793  | 5.9             | 1,611.1  | 167.1         | \$172                          | \$201                     | \$1,139   |
| 158 | Swaziland         | Lower middle                     | 0.150            | \$58,387 | \$87,699  | 11.5            | 1,280.6  | 281.0         | \$312                          | \$208                     | \$768     |
| 159 | Nigeria           | Lower middle                     | 0.133            | \$40,479 | \$34,860  | 6.7             | 1,610.1  | 187.0         | \$186                          | \$217                     | \$996     |
| 160 | Kenya             | Low                              | 0.065            | \$34,280 | \$35,682  | 5.2             | 1,130.6  | 142.8         | \$250                          | \$240                     | \$741     |
| 161 | Gabon             | Upper middle                     | 0.060            | \$29,826 | \$46,367  | 4.0             | 972.5    | 110.7         | \$419                          | \$269                     | \$883     |
| 162 | Congo, Rep.       | Lower middle                     | 0.067            | \$54,254 | \$42,228  | 7.2             | 1,522.2  | 199.0         | \$212                          | \$273                     | \$955     |
| 163 | Angola            | Upper middle                     | 0.088            | \$64,586 | \$44,239  | 8.5             | 1,758.3  | 236.6         | \$187                          | \$273                     | \$719     |
| 164 | Sudan             | Lower middle                     | 0.057            | \$38,413 | \$24,940  | 4.8             | 2,620.5  | 136.6         | \$183                          | \$281                     | \$1,731   |
| 165 | Mauritania        | Lower middle                     | 0.042            | \$36,346 | \$31,642  | 4.4             | 1,397.4  | 123.1         | \$257                          | \$295                     | \$904     |
| 166 | Madagascar        | Low                              | 0.043            | \$28,770 | \$26,424  | 3.0             | 1,079.4  | 84.6          | \$312                          | \$340                     | \$746     |
| 167 | Eritrea           | Low                              | 0.033            | \$27,392 | \$26,191  | 2.8             | 1,117.1  | 78.5          | \$334                          | \$349                     | \$1,025   |
| 168 | Yemen             | Lower middle                     | 0.025            | \$37,035 | \$27,682  | 3.5             | 1,778.2  | 99.3          | \$279                          | \$373                     | \$1,753   |
| 169 | Ghana             | Lower middle                     | 0.063            | \$44,612 | \$38,058  | 4.2             | 1,006.4  | 117.8         | \$323                          | \$379                     | \$577     |
| 170 | Haiti             | Low                              | 0.028            | \$30,836 | \$29,010  | 2.8             | 1,789.6  | 80.4          | \$361                          | \$384                     | \$869     |
| 171 | Pakistan          | Lower middle                     | 0.020            | \$41,856 | \$28,870  | 3.6             | 1,574.8  | 102.7         | \$281                          | \$407                     | \$632     |
| 172 | South Africa      | Upper middle                     | 0.097            | \$99,713 | \$115,007 | 9.1             | 659.2    | 235.9         | \$487                          | \$423                     | \$627     |

|    |    |                    |               |       |           |           |     |         |       |          |          |         |
|----|----|--------------------|---------------|-------|-----------|-----------|-----|---------|-------|----------|----------|---------|
| 1  | 43 | Namibia            | Upper middle  | 0.038 | \$75,606  | \$106,711 | 5.9 | 855.9   | 150.8 | \$708    | \$502    | \$582   |
| 2  | 44 | India              | Lower middle  | 0.027 | \$48,744  | \$40,648  | 3.4 | 713.2   | 96.2  | \$422    | \$506    | \$613   |
| 3  | 45 | Botswana           | Upper middle  | 0.080 | \$137,595 | \$139,112 | 9.9 | 634.1   | 262.4 | \$530    | \$524    | \$733   |
| 4  | 46 | Myanmar            | Low           | 0.026 | \$31,525  | \$29,473  | 1.7 | 672.6   | 48.0  | \$614    | \$657    | \$1,354 |
| 5  | 47 | Cambodia           | Low           | 0.014 | \$38,413  | \$33,905  | 1.3 | 758.8   | 37.6  | \$901    | \$1,020  | \$864   |
| 6  | 48 | Nepal              | Low           | 0.010 | \$30,836  | \$29,442  | 1.1 | 654.7   | 30.0  | \$982    | \$1,028  | \$758   |
| 7  | 49 | Iraq               | Upper middle  | 0.009 | \$53,565  | \$37,274  | 1.7 | 1,493.0 | 50.4  | \$740    | \$1,063  | \$606   |
| 8  | 50 | Guatemala          | Lower middle  | 0.016 | \$57,698  | \$35,999  | 1.8 | 1,812.5 | 51.6  | \$698    | \$1,118  | \$739   |
| 9  | 51 | Papua New Guinea   | Lower middle  | 0.018 | \$40,479  | \$31,703  | 1.2 | 1,488.7 | 35.8  | \$885    | \$1,130  | \$883   |
| 10 | 52 | Bangladesh         | Low           | 0.007 | \$35,658  | \$32,480  | 0.8 | 617.4   | 23.0  | \$1,413  | \$1,551  | \$650   |
| 11 | 53 | Morocco            | Lower middle  | 0.006 | \$58,387  | \$49,883  | 1.1 | 898.4   | 31.6  | \$1,577  | \$1,846  | \$1,046 |
| 12 | 54 | Algeria            | Upper middle  | 0.008 | \$73,540  | \$60,354  | 1.3 | 752.8   | 38.2  | \$1,580  | \$1,925  | \$606   |
| 13 | 55 | Uzbekistan         | Lower middle  | 0.006 | \$45,989  | \$34,086  | 0.5 | 1,357.2 | 14.9  | \$2,282  | \$3,079  | \$717   |
| 14 | 56 | Indonesia          | Lower middle  | 0.008 | \$56,321  | \$50,560  | 0.5 | 463.2   | 14.3  | \$3,545  | \$3,949  | \$600   |
| 15 | 57 | Thailand           | Upper middle  | 0.005 | \$90,759  | \$90,800  | 0.8 | 261.3   | 21.7  | \$4,177  | \$4,175  | \$622   |
| 16 | 58 | Vietnam            | Lower middle  | 0.005 | \$45,989  | \$42,516  | 0.3 | 477.7   | 8.2   | \$5,164  | \$5,586  | \$793   |
| 17 | 59 | Philippines        | Lower middle  | 0.003 | \$51,499  | \$44,213  | 0.3 | 743.4   | 8.8   | \$5,026  | \$5,854  | \$668   |
| 18 | 60 | Ukraine            | Lower middle  | 0.006 | \$74,228  | \$69,343  | 0.4 | 359.1   | 11.5  | \$6,052  | \$6,479  | \$664   |
| 19 | 61 | Bolivia            | Lower middle  | 0.010 | \$56,321  | \$41,435  | 0.2 | 1,162.3 | 8.2   | \$5,044  | \$6,856  | \$598   |
| 20 | 62 | Peru               | Upper middle  | 0.004 | \$95,580  | \$73,664  | 0.3 | 862.2   | 9.6   | \$7,650  | \$9,926  | \$613   |
| 21 | 63 | Colombia           | Upper middle  | 0.003 | \$95,580  | \$75,850  | 0.3 | 817.2   | 8.8   | \$8,575  | \$10,806 | \$581   |
| 22 | 64 | Brazil             | Upper middle  | 0.004 | \$104,534 | \$81,187  | 0.3 | 798.2   | 9.0   | \$9,029  | \$11,626 | \$724   |
| 23 | 65 | Russian Federation | High: nonOECD | 0.007 | \$143,794 | \$128,452 | 0.4 | 424.3   | 10.8  | \$11,898 | \$13,319 | \$579   |
| 24 | 66 | Malaysia           | Upper middle  | 0.004 | \$138,284 | \$117,395 | 0.2 | 536.0   | 6.6   | \$17,673 | \$20,818 | \$577   |
| 25 | 67 | Argentina          | Upper middle  | 0.003 | \$147,238 | \$119,687 | 0.2 | 632.8   | 6.8   | \$17,487 | \$21,512 | \$591   |
| 26 | 68 | Turkey             | Upper middle  | 0.001 | \$125,197 | \$86,272  | 0.1 | 1,029.3 | 3.9   | \$22,267 | \$32,314 | \$582   |
| 27 | 69 | China              | Upper middle  | 0.001 | \$84,560  | \$78,518  | 0.1 | 280.4   | 2.3   | \$33,785 | \$36,384 | \$583   |
| 28 | 70 | Mexico             | Upper middle  | 0.003 | \$127,264 | \$129,804 | 0.1 | 0.1     | 3.2   | \$40,371 | \$39,581 | \$638   |

**Tech. Suppl. - Table 2.** Summary costs and cost-effectiveness results per 1,000 IPC participants for 70 countries ordered from highest to lowest opportunity index score reflecting per-capita HIV, TB and malaria disease burden. Grey cells indicate cost-effectiveness ratios less favorable than investment in ART. Results shown are for the first 3-year campaign.

|    | Country           | World Bank income classification | DALYs per capita | Costs     |           | Disease averted |          | DALYs averted | Cost-effectiveness (CE)        |                           |           |
|----|-------------------|----------------------------------|------------------|-----------|-----------|-----------------|----------|---------------|--------------------------------|---------------------------|-----------|
|    |                   |                                  |                  | IPC cost  | Net cost  | Deaths          | Episodes |               | Campaign cost per DALY averted | Net cost per DALY averted | CE of ART |
| 11 | Swaziland         | Lower middle                     | 0.150            | \$58,387  | \$198,392 | 29.1            | 2,230    | 724.2         | \$81                           | \$274                     | \$632     |
| 12 | Mozambique        | Low                              | 0.141            | \$30,147  | \$59,145  | 22.2            | 3,816    | 590.0         | \$51                           | \$100                     | \$1,109   |
| 13 | Guinea-Bissau     | Low                              | 0.134            | \$29,459  | \$7,814   | 40.7            | 10,523   | 1143.3        | \$26                           | \$7                       | \$1,005   |
| 14 | Nigeria           | Lower middle                     | 0.133            | \$40,479  | \$34,769  | 13.4            | 3,102    | 369.3         | \$110                          | \$94                      | \$747     |
| 15 | Zambia            | Lower middle                     | 0.128            | \$33,591  | \$69,806  | 21.8            | 3,107    | 564.3         | \$60                           | \$124                     | \$826     |
| 16 | Burkina Faso      | Low                              | 0.126            | \$31,525  | \$22,206  | 16.4            | 4,124    | 459.4         | \$69                           | \$48                      | \$819     |
| 17 | Mali              | Low                              | 0.124            | \$29,459  | \$23,016  | 15.9            | 4,222    | 445.8         | \$66                           | \$52                      | \$888     |
| 18 | Somalia           | Low                              | 0.121            | \$26,015  | \$22,754  | 16.8            | 3,682    | 470.5         | \$55                           | \$48                      | \$1,535   |
| 19 | Chad              | Low                              | 0.120            | \$35,658  | \$24,848  | 15.3            | 4,335    | 424.6         | \$84                           | \$59                      | \$807     |
| 20 | Sierra Leone      | Low                              | 0.119            | \$31,525  | \$20,112  | 16.0            | 4,118    | 446.7         | \$71                           | \$45                      | \$764     |
| 21 | Burundi           | Low                              | 0.118            | \$26,015  | \$33,639  | 14.3            | 2,267    | 389.9         | \$67                           | \$86                      | \$987     |
| 22 | Lesotho           | Lower middle                     | 0.115            | \$35,658  | \$47,366  | 31.3            | 1,756    | 779.4         | \$46                           | \$61                      | \$738     |
| 23 | Congo, DR         | Low                              | 0.112            | \$24,637  | \$25,488  | 13.4            | 3,517    | 375.9         | \$66                           | \$68                      | \$1,493   |
| 24 | Niger             | Low                              | 0.110            | \$28,081  | \$21,620  | 14.8            | 4,967    | 419.7         | \$67                           | \$52                      | \$1,095   |
| 25 | Malawi            | Low                              | 0.110            | \$28,081  | \$59,745  | 18.3            | 2,965    | 462.2         | \$61                           | \$129                     | \$996     |
| 26 | Ken. African Rep. | Low                              | 0.105            | \$27,392  | \$37,525  | 13.8            | 2,819    | 373.3         | \$73                           | \$101                     | \$1,230   |
| 27 | Uganda            | Low                              | 0.105            | \$31,525  | \$40,192  | 14.9            | 3,492    | 399.8         | \$79                           | \$101                     | \$749     |
| 28 | Cameroon          | Lower middle                     | 0.100            | \$37,724  | \$52,388  | 14.3            | 3,115    | 388.4         | \$97                           | \$135                     | \$741     |
| 29 | South Africa      | Upper middle                     | 0.097            | \$99,713  | \$180,284 | 21.5            | 1,150    | 561.0         | \$178                          | \$321                     | \$582     |
| 30 | Guinea            | Low                              | 0.095            | \$29,459  | \$22,324  | 12.6            | 4,272    | 353.8         | \$83                           | \$63                      | \$928     |
| 31 | Liberia           | Low                              | 0.092            | \$26,704  | \$25,526  | 11.9            | 3,401    | 332.6         | \$80                           | \$77                      | \$1,025   |
| 32 | Angola            | Upper middle                     | 0.088            | \$64,586  | \$35,794  | 11.5            | 3,268    | 320.8         | \$201                          | \$112                     | \$674     |
| 33 | Côte d'Ivoire     | Lower middle                     | 0.084            | \$33,591  | \$35,069  | 14.1            | 4,021    | 387.2         | \$87                           | \$91                      | \$801     |
| 34 | Benin             | Low                              | 0.083            | \$33,591  | \$25,345  | 10.0            | 3,096    | 280.0         | \$120                          | \$91                      | \$910     |
| 35 | Botswana          | Upper middle                     | 0.080            | \$137,595 | \$185,872 | 26.8            | 1,111    | 734.1         | \$187                          | \$253                     | \$577     |
| 36 | Zimbabwe          | Low                              | 0.075            | \$25,326  | \$76,203  | 17.8            | 1,682    | 428.8         | \$59                           | \$178                     | \$1,731   |
| 37 | Tanzania          | Low                              | 0.075            | \$33,591  | \$38,453  | 12.1            | 3,122    | 326.9         | \$103                          | \$118                     | \$935     |
| 38 | Togo              | Low                              | 0.075            | \$29,459  | \$32,147  | 10.4            | 2,849    | 288.7         | \$102                          | \$111                     | \$864     |
| 39 | Rwanda            | Low                              | 0.071            | \$31,525  | \$34,034  | 9.6             | 2,216    | 266.1         | \$118                          | \$128                     | \$768     |
| 40 | Congo, Rep.       | Lower middle                     | 0.067            | \$54,254  | \$33,944  | 11.5            | 2,981    | 318.5         | \$170                          | \$107                     | \$756     |
| 41 | Kenya             | Low                              | 0.065            | \$34,280  | \$46,149  | 10.9            | 2,018    | 294.1         | \$117                          | \$157                     | \$883     |
| 42 | Ghana             | Lower middle                     | 0.063            | \$44,612  | \$35,624  | 6.8             | 1,966    | 189.9         | \$235                          | \$188                     | \$746     |
| 43 | Gabon             | Upper middle                     | 0.060            | \$29,826  | \$84,306  | 9.3             | 1,876    | 255.0         | \$117                          | \$331                     | \$613     |
| 44 | Ethiopia          | Low                              | 0.057            | \$30,147  | \$29,630  | 8.6             | 1,986    | 235.7         | \$128                          | \$126                     | \$1,139   |
| 45 | Sudan             | Lower middle                     | 0.057            | \$38,413  | \$15,241  | 6.9             | 4,907    | 198.8         | \$193                          | \$77                      | \$703     |
| 46 | Afghanistan       | Low                              | 0.057            | \$28,770  | \$18,906  | 12.7            | 4,146    | 356.6         | \$81                           | \$53                      | \$935     |

|    |    |                    |               |       |           |           |      |       |       |          |          |         |
|----|----|--------------------|---------------|-------|-----------|-----------|------|-------|-------|----------|----------|---------|
| 1  | 37 | Senegal            | Lower middle  | 0.050 | \$34,969  | \$12,190  | 10.7 | 5,735 | 306.0 | \$114    | \$40     | \$768   |
| 2  | 38 | Madagascar         | Low           | 0.043 | \$28,770  | \$24,895  | 4.5  | 1,910 | 127.8 | \$225    | \$195    | \$1,025 |
| 3  | 39 | Mauritania         | Lower middle  | 0.042 | \$36,346  | \$28,117  | 5.8  | 2,607 | 164.2 | \$221    | \$171    | \$955   |
| 4  | 40 | Namibia            | Upper middle  | 0.038 | \$75,606  | \$204,271 | 15.6 | 1,528 | 402.7 | \$188    | \$507    | \$606   |
| 5  | 41 | Eritrea            | Low           | 0.033 | \$27,392  | \$26,438  | 4.3  | 1,942 | 120.5 | \$227    | \$219    | \$1,753 |
| 6  | 42 | Haiti              | Low           | 0.028 | \$30,836  | \$31,570  | 4.4  | 3,128 | 123.0 | \$251    | \$257    | \$869   |
| 7  | 43 | India              | Lower middle  | 0.027 | \$48,744  | \$34,973  | 3.7  | 1,255 | 104.9 | \$464    | \$333    | \$733   |
| 8  | 44 | Myanmar            | Low           | 0.026 | \$31,525  | \$28,249  | 2.9  | 1,306 | 83.7  | \$377    | \$337    | \$1,354 |
| 9  | 45 | Yemen              | Lower middle  | 0.025 | \$37,035  | \$21,139  | 4.3  | 3,128 | 122.9 | \$301    | \$172    | \$719   |
| 10 | 46 | Pakistan           | Lower middle  | 0.020 | \$41,856  | \$19,714  | 3.8  | 2,748 | 108.1 | \$387    | \$182    | \$904   |
| 11 | 47 | Papua New Guinea   | Lower middle  | 0.018 | \$40,479  | \$25,117  | 2.4  | 2,868 | 71.2  | \$568    | \$353    | \$864   |
| 12 | 48 | Guatemala          | Lower middle  | 0.016 | \$57,698  | \$22,134  | 2.4  | 3,143 | 70.1  | \$823    | \$316    | \$627   |
| 13 | 49 | Cambodia           | Low           | 0.014 | \$38,413  | \$31,172  | 1.9  | 1,341 | 54.3  | \$708    | \$574    | \$739   |
| 14 | 50 | Nepal              | Low           | 0.010 | \$30,836  | \$28,994  | 1.4  | 1,135 | 39.8  | \$776    | \$729    | \$883   |
| 15 | 51 | Bolivia            | Lower middle  | 0.010 | \$56,321  | \$30,994  | 0.4  | 2,015 | 13.5  | \$4,178  | \$2,299  | \$668   |
| 16 | 52 | Iraq               | Upper middle  | 0.009 | \$53,565  | \$25,989  | 1.9  | 2,587 | 55.8  | \$960    | \$466    | \$758   |
| 17 | 53 | Algeria            | Upper middle  | 0.008 | \$73,540  | \$51,390  | 1.4  | 1,304 | 41.0  | \$1,793  | \$1,253  | \$606   |
| 18 | 54 | Indonesia          | Lower middle  | 0.008 | \$56,321  | \$46,677  | 0.7  | 814   | 20.8  | \$2,708  | \$2,244  | \$793   |
| 19 | 55 | Bangladesh         | Low           | 0.007 | \$35,658  | \$30,236  | 0.9  | 1,076 | 25.9  | \$1,377  | \$1,168  | \$1,046 |
| 20 | 56 | Russian Federation | High: nonOECD | 0.007 | \$143,794 | \$121,954 | 1.1  | 735   | 31.2  | \$4,607  | \$3,907  | \$579   |
| 21 | 57 | Uzbekistan         | Lower middle  | 0.006 | \$45,989  | \$25,637  | 0.6  | 2,352 | 18.2  | \$2,523  | \$1,406  | \$717   |
| 22 | 58 | Morocco            | Lower middle  | 0.006 | \$58,387  | \$42,818  | 1.9  | 1,623 | 54.8  | \$1,066  | \$782    | \$650   |
| 23 | 59 | Ukraine            | Lower middle  | 0.006 | \$74,228  | \$68,364  | 1.2  | 623   | 33.6  | \$2,210  | \$2,036  | \$600   |
| 24 | 60 | Thailand           | Upper middle  | 0.005 | \$90,759  | \$100,377 | 1.8  | 455   | 48.7  | \$1,863  | \$2,061  | \$622   |
| 25 | 61 | Vietnam            | Lower middle  | 0.005 | \$45,989  | \$40,910  | 0.6  | 828   | 17.6  | \$2,616  | \$2,327  | \$664   |
| 26 | 62 | Malaysia           | Upper middle  | 0.004 | \$138,284 | \$104,408 | 0.6  | 930   | 17.6  | \$7,858  | \$5,933  | \$591   |
| 27 | 63 | Brazil             | Upper middle  | 0.004 | \$104,534 | \$65,501  | 0.6  | 1,385 | 19.2  | \$5,431  | \$3,403  | \$581   |
| 28 | 64 | Peru               | Upper middle  | 0.004 | \$95,580  | \$59,439  | 0.6  | 1,497 | 19.0  | \$5,026  | \$3,126  | \$613   |
| 29 | 65 | Colombia           | Upper middle  | 0.003 | \$95,580  | \$63,657  | 0.6  | 1,419 | 20.5  | \$4,652  | \$3,098  | \$598   |
| 30 | 66 | Mexico             | Upper middle  | 0.003 | \$127,264 | \$134,901 | 0.3  | 0     | 9.6   | \$13,197 | \$13,989 | \$583   |
| 31 | 67 | Philippines        | Lower middle  | 0.003 | \$51,499  | \$39,031  | 0.3  | 1,289 | 10.9  | \$4,746  | \$3,597  | \$724   |
| 32 | 68 | Argentina          | Upper middle  | 0.003 | \$147,238 | \$101,854 | 0.6  | 1,097 | 18.1  | \$8,155  | \$5,642  | \$577   |
| 33 | 69 | China              | Upper middle  | 0.001 | \$84,560  | \$74,564  | 0.1  | 486   | 4.7   | \$18,015 | \$15,886 | \$638   |
| 34 | 70 | Turkey             | Upper middle  | 0.001 | \$125,197 | \$58,058  | 0.1  | 1,784 | 6.1   | \$20,489 | \$9,501  | \$582   |

46  
47  
48  
49  
50  
51  
52  
53  
54  
55  
56  
57  
58  
59  
60

**Tech. Suppl. - Table 3.** Summary costs and cost-effectiveness results per 1,000 IPC participants for 70 countries ordered from highest to lowest opportunity index score reflecting per-capita HIV, TB and malaria disease burden. Grey highlighted cells indicate cost-effectiveness ratios less favorable than investment in ART Results shown are for the second and subsequent 3-year campaigns.

|    | Country           | World Bank income classification | DALYs per capita | Costs     |           | Disease averted |          | DALYs averted | Cost-effectiveness (CE)        |                           |           |
|----|-------------------|----------------------------------|------------------|-----------|-----------|-----------------|----------|---------------|--------------------------------|---------------------------|-----------|
|    |                   |                                  |                  | IPC cost  | Net cost  | Deaths          | Episodes |               | Campaign cost per DALY averted | Net cost per DALY averted | CE of ART |
| 1  | Swaziland         | Lower middle                     | 0.150            | \$58,387  | \$87,699  | 11.5            | 1,281    | 281.0         | \$312                          | \$208                     | \$632     |
| 2  | Mozambique        | Low                              | 0.141            | \$30,147  | \$36,613  | 9.7             | 1,976    | 260.0         | \$141                          | \$116                     | \$1,109   |
| 3  | Guinea-Bissau     | Low                              | 0.134            | \$29,459  | \$16,675  | 26.9            | 5,465    | 754.3         | \$22                           | \$39                      | \$1,005   |
| 4  | Nigeria           | Lower middle                     | 0.133            | \$40,479  | \$34,860  | 6.7             | 1,610    | 187.0         | \$186                          | \$217                     | \$747     |
| 5  | Zambia            | Lower middle                     | 0.128            | \$33,591  | \$41,222  | 10.1            | 1,660    | 263.4         | \$156                          | \$128                     | \$826     |
| 6  | Burkina Faso      | Low                              | 0.126            | \$31,525  | \$26,076  | 9.6             | 2,153    | 270.2         | \$96                           | \$117                     | \$819     |
| 7  | Mali              | Low                              | 0.124            | \$29,459  | \$25,298  | 10.0            | 2,312    | 280.1         | \$90                           | \$105                     | \$888     |
| 8  | Somalia           | Low                              | 0.121            | \$26,015  | \$23,643  | 11.6            | 2,055    | 325.2         | \$73                           | \$80                      | \$1,535   |
| 9  | Chad              | Low                              | 0.120            | \$35,658  | \$27,805  | 10.6            | 2,258    | 294.9         | \$94                           | \$121                     | \$807     |
| 10 | Sierra Leone      | Low                              | 0.119            | \$31,525  | \$24,508  | 9.8             | 2,143    | 274.1         | \$89                           | \$115                     | \$764     |
| 11 | Burundi           | Low                              | 0.118            | \$26,015  | \$27,699  | 8.7             | 1,256    | 239.8         | \$116                          | \$108                     | \$987     |
| 12 | Lesotho           | Lower middle                     | 0.115            | \$35,658  | \$37,171  | 11.7            | 919      | 283.6         | \$131                          | \$126                     | \$738     |
| 13 | Congo, DR         | Low                              | 0.112            | \$24,637  | \$24,258  | 9.3             | 1,852    | 259.2         | \$94                           | \$95                      | \$1,493   |
| 14 | Niger             | Low                              | 0.110            | \$28,081  | \$24,250  | 10.0            | 2,648    | 282.6         | \$86                           | \$99                      | \$1,095   |
| 15 | Malawi            | Low                              | 0.110            | \$28,081  | \$36,299  | 8.6             | 1,532    | 221.8         | \$164                          | \$127                     | \$996     |
| 16 | Gen. African Rep. | Low                              | 0.105            | \$27,392  | \$29,606  | 7.1             | 1,444    | 194.2         | \$152                          | \$141                     | \$1,230   |
| 17 | Uganda            | Low                              | 0.105            | \$31,525  | \$31,104  | 7.9             | 1,842    | 214.8         | \$145                          | \$147                     | \$749     |
| 18 | Cameroon          | Lower middle                     | 0.100            | \$37,724  | \$39,507  | 8.1             | 1,620    | 223.1         | \$177                          | \$169                     | \$741     |
| 19 | South Africa      | Upper middle                     | 0.097            | \$99,713  | \$115,007 | 9.1             | 659      | 235.9         | \$487                          | \$423                     | \$582     |
| 20 | Guinea            | Low                              | 0.095            | \$29,459  | \$25,199  | 7.4             | 2,176    | 208.8         | \$121                          | \$141                     | \$928     |
| 21 | Liberia           | Low                              | 0.092            | \$26,704  | \$25,199  | 6.8             | 1,763    | 190.4         | \$132                          | \$140                     | \$1,025   |
| 22 | Angola            | Upper middle                     | 0.088            | \$64,586  | \$44,239  | 8.5             | 1,758    | 236.6         | \$187                          | \$273                     | \$674     |
| 23 | Côte d'Ivoire     | Lower middle                     | 0.084            | \$33,591  | \$31,110  | 7.8             | 2,010    | 214.9         | \$145                          | \$156                     | \$801     |
| 24 | Benin             | Low                              | 0.083            | \$33,591  | \$28,793  | 5.9             | 1,611    | 167.1         | \$172                          | \$201                     | \$910     |
| 25 | Botswana          | Upper middle                     | 0.080            | \$137,595 | \$139,112 | 9.9             | 634      | 262.4         | \$530                          | \$524                     | \$577     |
| 26 | Zimbabwe          | Low                              | 0.075            | \$25,326  | \$40,453  | 6.9             | 905      | 165.8         | \$244                          | \$153                     | \$1,731   |
| 27 | Tanzania          | Low                              | 0.075            | \$33,591  | \$32,273  | 6.1             | 1,637    | 167.4         | \$193                          | \$201                     | \$935     |
| 28 | Togo              | Low                              | 0.075            | \$29,459  | \$28,877  | 5.5             | 1,467    | 153.3         | \$188                          | \$192                     | \$864     |
| 29 | Rwanda            | Low                              | 0.071            | \$31,525  | \$30,620  | 5.9             | 1,249    | 163.9         | \$187                          | \$192                     | \$768     |
| 30 | Congo, Rep.       | Lower middle                     | 0.067            | \$54,254  | \$42,228  | 7.2             | 1,522    | 199.0         | \$212                          | \$273                     | \$756     |
| 31 | Kenya             | Low                              | 0.065            | \$34,280  | \$35,682  | 5.2             | 1,131    | 142.8         | \$250                          | \$240                     | \$883     |
| 32 | Ghana             | Lower middle                     | 0.063            | \$44,612  | \$38,058  | 4.2             | 1,006    | 117.8         | \$323                          | \$379                     | \$746     |
| 33 | Gabon             | Upper middle                     | 0.060            | \$29,826  | \$46,367  | 4.0             | 972      | 110.7         | \$419                          | \$269                     | \$613     |

|    |    |                    |               |       |           |           |      |       |       |          |          |         |
|----|----|--------------------|---------------|-------|-----------|-----------|------|-------|-------|----------|----------|---------|
| 1  | 34 | Ethiopia           | Low           | 0.057 | \$30,147  | \$28,881  | 6.5  | 1,128 | 181.8 | \$159    | \$166    | \$1,139 |
| 2  | 35 | Sudan              | Lower middle  | 0.057 | \$38,413  | \$24,940  | 4.8  | 2,620 | 136.6 | \$183    | \$281    | \$703   |
| 3  | 36 | Afghanistan        | Low           | 0.057 | \$28,770  | \$22,700  | 12.2 | 2,381 | 342.0 | \$66     | \$84     | \$935   |
| 4  | 37 | Senegal            | Lower middle  | 0.050 | \$34,969  | \$22,535  | 6.8  | 2,952 | 193.6 | \$116    | \$181    | \$768   |
| 5  | 38 | Madagascar         | Low           | 0.043 | \$28,770  | \$26,424  | 3.0  | 1,079 | 84.6  | \$312    | \$340    | \$1,025 |
| 6  | 39 | Mauritania         | Lower middle  | 0.042 | \$36,346  | \$31,642  | 4.4  | 1,397 | 123.1 | \$257    | \$295    | \$955   |
| 7  | 40 | Namibia            | Upper middle  | 0.038 | \$75,606  | \$106,711 | 5.9  | 856   | 150.8 | \$708    | \$502    | \$606   |
| 8  | 41 | Eritrea            | Low           | 0.033 | \$27,392  | \$26,191  | 2.8  | 1,117 | 78.5  | \$334    | \$349    | \$1,753 |
| 9  | 42 | Haiti              | Low           | 0.028 | \$30,836  | \$29,010  | 2.8  | 1,790 | 80.4  | \$361    | \$384    | \$869   |
| 10 | 43 | India              | Lower middle  | 0.027 | \$48,744  | \$40,648  | 3.4  | 713   | 96.2  | \$422    | \$506    | \$733   |
| 11 | 44 | Myanmar            | Low           | 0.026 | \$31,525  | \$29,473  | 1.7  | 673   | 48.0  | \$614    | \$657    | \$1,354 |
| 12 | 45 | Yemen              | Lower middle  | 0.025 | \$37,035  | \$27,682  | 3.5  | 1,778 | 99.3  | \$279    | \$373    | \$719   |
| 13 | 46 | Pakistan           | Lower middle  | 0.020 | \$41,856  | \$28,870  | 3.6  | 1,575 | 102.7 | \$281    | \$407    | \$904   |
| 14 | 47 | Papua New Guinea   | Lower middle  | 0.018 | \$40,479  | \$31,703  | 1.2  | 1,489 | 35.8  | \$885    | \$1,130  | \$864   |
| 15 | 48 | Guatemala          | Lower middle  | 0.016 | \$57,698  | \$35,999  | 1.8  | 1,813 | 51.6  | \$698    | \$1,118  | \$627   |
| 16 | 49 | Cambodia           | Low           | 0.014 | \$38,413  | \$33,905  | 1.3  | 759   | 37.6  | \$901    | \$1,020  | \$739   |
| 17 | 50 | Nepal              | Low           | 0.010 | \$30,836  | \$29,442  | 1.1  | 655   | 30.0  | \$982    | \$1,028  | \$883   |
| 18 | 51 | Bolivia            | Lower middle  | 0.010 | \$56,321  | \$41,435  | 0.2  | 1,162 | 8.2   | \$5,044  | \$6,856  | \$668   |
| 19 | 52 | Iraq               | Upper middle  | 0.009 | \$53,565  | \$37,274  | 1.7  | 1,493 | 50.4  | \$740    | \$1,063  | \$758   |
| 20 | 53 | Algeria            | Upper middle  | 0.008 | \$73,540  | \$60,354  | 1.3  | 753   | 38.2  | \$1,580  | \$1,925  | \$606   |
| 21 | 54 | Indonesia          | Lower middle  | 0.008 | \$56,321  | \$50,560  | 0.5  | 463   | 14.3  | \$3,545  | \$3,949  | \$793   |
| 22 | 55 | Bangladesh         | Low           | 0.007 | \$35,658  | \$32,480  | 0.8  | 617   | 23.0  | \$1,413  | \$1,551  | \$1,046 |
| 23 | 56 | Russian Federation | High: nonOECD | 0.007 | \$143,794 | \$128,452 | 0.4  | 424   | 10.8  | \$11,898 | \$13,319 | \$579   |
| 24 | 57 | Uzbekistan         | Lower middle  | 0.006 | \$45,989  | \$34,086  | 0.5  | 1,357 | 14.9  | \$2,282  | \$3,079  | \$717   |
| 25 | 58 | Morocco            | Lower middle  | 0.006 | \$58,387  | \$49,883  | 1.1  | 898   | 31.6  | \$1,577  | \$1,846  | \$650   |
| 26 | 59 | Ukraine            | Lower middle  | 0.006 | \$74,228  | \$69,343  | 0.4  | 359   | 11.5  | \$6,052  | \$6,479  | \$600   |
| 27 | 60 | Thailand           | Upper middle  | 0.005 | \$90,759  | \$90,800  | 0.8  | 261   | 21.7  | \$4,177  | \$4,175  | \$622   |
| 28 | 61 | Vietnam            | Lower middle  | 0.005 | \$45,989  | \$42,516  | 0.3  | 478   | 8.2   | \$5,164  | \$5,586  | \$664   |
| 29 | 62 | Malaysia           | Upper middle  | 0.004 | \$138,284 | \$117,395 | 0.2  | 536   | 6.6   | \$17,673 | \$20,818 | \$591   |
| 30 | 63 | Brazil             | Upper middle  | 0.004 | \$104,534 | \$81,187  | 0.3  | 798   | 9.0   | \$9,029  | \$11,626 | \$581   |
| 31 | 64 | Peru               | Upper middle  | 0.004 | \$95,580  | \$73,664  | 0.3  | 862   | 9.6   | \$7,650  | \$9,926  | \$613   |
| 32 | 65 | Colombia           | Upper middle  | 0.003 | \$95,580  | \$75,850  | 0.3  | 817   | 8.8   | \$8,575  | \$10,806 | \$598   |
| 33 | 66 | Mexico             | Upper middle  | 0.003 | \$127,264 | \$129,804 | 0.1  | 0     | 3.2   | \$40,371 | \$39,581 | \$583   |
| 34 | 67 | Philippines        | Lower middle  | 0.003 | \$51,499  | \$44,213  | 0.3  | 743   | 8.8   | \$5,026  | \$5,854  | \$724   |
| 35 | 68 | Argentina          | Upper middle  | 0.003 | \$147,238 | \$119,687 | 0.2  | 633   | 6.8   | \$17,487 | \$21,512 | \$577   |
| 36 | 69 | China              | Upper middle  | 0.001 | \$84,560  | \$78,518  | 0.1  | 280   | 2.3   | \$33,785 | \$36,384 | \$638   |
| 37 | 70 | Turkey             | Upper middle  | 0.001 | \$125,197 | \$86,272  | 0.1  | 1,029 | 3.9   | \$22,267 | \$32,314 | \$582   |



**Tech. Suppl. - Table 4.** Relative contribution of diarrhoea, malaria and HIV to disease burden of each of 70 countries.

| Country           | Total DALY burden (3 diseases) | Population    | DALYs per capita | Diarrhoea        |            | Malaria        |            | HIV        |           |
|-------------------|--------------------------------|---------------|------------------|------------------|------------|----------------|------------|------------|-----------|
|                   |                                |               |                  | Diarrhoea burden | DALYs      | Malaria burden | DALYs      | HIV burden | DALYs     |
| Swaziland         | 158,061                        | 1,055,506     | 0.1497           | 8.4              | 16,523     | 0.03           | 4,338      | 25.9       | 137,200   |
| Mozambique        | 3,288,897                      | 23,390,765    | 0.1406           | 11.9             | 532,817    | 12.49          | 1,482,080  | 11.5       | 1,274,000 |
| Guinea-Bissau     | 203,103                        | 1,515,224     | 0.1340           | 19.1             | 78,434     | 17.65          | 104,089    | 2.5        | 20,580    |
| Nigeria           | 21,145,996                     | 158,423,182   | 0.1335           | 18.7             | 4,995,101  | 20.19          | 12,818,894 | 3.6        | 3,332,000 |
| Zambia            | 1,654,717                      | 12,926,409    | 0.1280           | 14.6             | 410,637    | 15.24          | 499,280    | 13.5       | 744,800   |
| Burkina Faso      | 2,079,356                      | 16,468,714    | 0.1263           | 18.9             | 659,064    | 20.39          | 1,353,652  | 1.2        | 66,640    |
| Mali              | 1,905,686                      | 15,369,809    | 0.1240           | 19.2             | 715,293    | 20.83          | 1,145,312  | 1          | 45,080    |
| Somalia           | 1,131,667                      | 9,330,872     | 0.1213           | 21.8             | 534,781    | 5.85           | 512,605    | 0.7        | 84,280    |
| Chad              | 1,341,959                      | 11,227,208    | 0.1195           | 21.9             | 652,646    | 18.59          | 400,213    | 3.4        | 289,100   |
| Sierra Leone      | 698,366                        | 5,867,536     | 0.1190           | 20.9             | 246,659    | 12.94          | 405,647    | 1.6        | 46,060    |
| Burundi           | 991,869                        | 8,382,849     | 0.1183           | 23.6             | 393,025    | 9.25           | 461,645    | 3.3        | 137,200   |
| Lesotho           | 250,467                        | 2,171,318     | 0.1154           | 9.9              | 25,067     | 0.00           | Unknown    | 23.6       | 225,400   |
| Congo, DR         | 7,371,699                      | 65,965,795    | 0.1118           | 18.5             | 3,414,271  | 17.02          | 3,389,027  | 1.3        | 568,400   |
| Niger             | 1,711,372                      | 15,511,953    | 0.1103           | 20.3             | 744,317    | 17.95          | 907,275    | 0.8        | 59,780    |
| Malawi            | 1,632,385                      | 14,900,841    | 0.1095           | 10.9             | 431,392    | 16.64          | 485,593    | 11         | 715,400   |
| Ken. African Rep. | 463,590                        | 4,401,051     | 0.1053           | 17.3             | 140,555    | 14.32          | 272,074    | 4.7        | 50,960    |
| Uganda            | 3,513,177                      | 33,424,683    | 0.1051           | 16.0             | 1,078,814  | 22.40          | 1,258,363  | 6.5        | 1,176,000 |
| Cameroon          | 1,957,804                      | 19,598,889    | 0.0999           | 16.2             | 683,514    | 19.05          | 705,891    | 5.3        | 568,400   |
| South Africa      | 4,851,895                      | 49,991,300    | 0.0971           | 8.7              | 1,010,490  | 0.07           | 19,404     | 17.8       | 3,822,000 |
| Guinea            | 950,891                        | 9,981,590     | 0.0953           | 13.8             | 305,921    | 23.62          | 584,210    | 1.3        | 60,760    |
| Liberia           | 367,478                        | 3,994,122     | 0.0920           | 17.2             | 112,638    | 15.56          | 231,809    | 1.5        | 23,030    |
| Angola            | 1,682,066                      | 19,081,912    | 0.0881           | 25.0             | 974,838    | 8.41           | 491,628    | 2          | 215,600   |
| Côte d'Ivoire     | 1,651,534                      | 19,737,800    | 0.0837           | 13.2             | 518,311    | 21.10          | 966,623    | 3.4        | 166,600   |
| Benin             | 732,327                        | 8,849,892     | 0.0827           | 13.0             | 248,863    | 23.34          | 435,445    | 1.2        | 48,020    |
| Botswana          | 161,239                        | 2,006,945     | 0.0803           | 7.0              | 13,221     | 1.04           | 10,818     | 24.8       | 137,200   |
| Zimbabwe          | 944,891                        | 12,571,454    | 0.0752           | 9.2              | 132,798    | 3.43           | 204,493    | 14.3       | 607,600   |
| Tanzania          | 3,360,788                      | 44,841,226    | 0.0749           | 11.6             | 1,025,316  | 16.43          | 1,355,472  | 5.6        | 980,000   |
| Togo              | 450,236                        | 6,027,798     | 0.0747           | 11.6             | 124,279    | 25.67          | 227,957    | 3.2        | 98,000    |
| Rwanda            | 753,413                        | 10,624,005    | 0.0709           | 22.6             | 357,674    | 5.91           | 309,499    | 2.9        | 86,240    |
| Congo, Rep.       | 270,651                        | 4,042,899     | 0.0669           | 14.3             | 81,602     | 23.85          | 125,349    | 3.4        | 63,700    |
| Kenya             | 2,637,405                      | 40,512,682    | 0.0651           | 20.5             | 796,738    | 10.94          | 762,667    | 6.3        | 1,078,000 |
| Ghana             | 1,542,491                      | 24,391,823    | 0.0632           | 9.5              | 669,521    | 26.25          | 657,370    | 1.8        | 215,600   |
| Gabon             | 90,936                         | 1,505,463     | 0.0604           | 5.9              | 16,740     | 29.32          | 38,915     | 5.2        | 35,280    |
| Ethiopia          | 4,754,652                      | 82,949,541    | 0.0573           | 22.8             | 3,507,206  | 6.78           | 1,247,446  | 1.5        | Unknown   |
| Sudan             | 1,925,260                      | 33,603,637    | 0.0573           | 10.6             | 850,260    | 24.89          | 526,200    | 1.1        | 548,800   |
| Afghanistan       | 1,954,973                      | 34,385,068    | 0.0569           | 28.9             | 1,864,324  | 0.01           | 90,648     | 0.2        | Unknown   |
| Senegal           | 623,509                        | 12,433,728    | 0.0501           | 14.8             | 229,547    | 18.73          | 335,162    | 0.9        | 58,800    |
| Madagascar        | 881,807                        | 20,713,819    | 0.0426           | 22.5             | 368,469    | 3.51           | 486,388    | 0.2        | 26,950    |
| Mauritania        | 144,515                        | 3,459,773     | 0.0418           | 15.7             | 83,866     | 13.33          | 46,929     | 0.7        | 13,720    |
| Namibia           | 87,587                         | 2,283,289     | 0.0384           | 6.3              | 15,072     | 5.11           | 15,675     | 13.1       | 56,840    |
| Eritrea           | 175,006                        | 5,253,676     | 0.0333           | 21.4             | 83,796     | 0.28           | 78,470     | 0.8        | 12,740    |
| Haiti             | 280,740                        | 9,993,247     | 0.0281           | 20.3             | 173,247    | 0.87           | 21,253     | 1.9        | 86,240    |
| India             | 33,617,476                     | 1,224,614,327 | 0.0275           | 13.0             | 30,747,070 | 0.34           | 1,498,406  | 0.3        | 1,372,000 |

|    |                    |           |               |        |      |           |      |         |      |         |
|----|--------------------|-----------|---------------|--------|------|-----------|------|---------|------|---------|
| 1  | Myanmar            | 1,243,928 | 47,963,012    | 0.0259 | 12.8 | 403,734   | 1.75 | 673,594 | 0.6  | 166,600 |
| 2  | Yemen              | 599,468   | 24,052,514    | 0.0249 | 20.2 | 415,209   | 0.46 | 184,259 | 0.2  | Unknown |
| 3  | Pakistan           | 3,465,577 | 173,593,383   | 0.0200 | 16.0 | 3,220,422 | 0.12 | 135,885 | 0.1  | 109,270 |
| 4  | Papua New Guinea   | 121,356   | 6,858,266     | 0.0177 | 5.2  | 31,732    | 7.29 | 58,264  | 0.9  | 31,360  |
| 5  | Guatemala          | 225,349   | 14,388,929    | 0.0157 | 19.1 | 152,755   | 0.00 | 1,054   | 0.8  | 71,540  |
| 6  | Cambodia           | 191,054   | 14,138,255    | 0.0135 | 7.1  | 121,042   | 0.78 | 53,352  | 0.5  | 16,660  |
| 7  | Nepal              | 297,240   | 29,959,364    | 0.0099 | 14.7 | 229,536   | 0.02 | 20,664  | 0.4  | 47,040  |
| 8  | Bolivia            | 98,154    | 9,929,849     | 0.0099 | 15.2 | 85,256    | 0.02 | 648     | 0.2  | 12,250  |
| 9  | Iraq               | 301,208   | 32,030,823    | 0.0094 | 11.6 | 301,208   | 0.00 | Unknown | 0.2  | Unknown |
| 10 | Algeria            | 296,287   | 35,468,208    | 0.0084 | 12.8 | 272,766   | 0.00 | 0       | 0.1  | 23,520  |
| 11 | Indonesia          | 1,849,471 | 239,870,937   | 0.0077 | 15.1 | 924,024   | 0.80 | 357,048 | 0.2  | 568,400 |
| 12 | Bangladesh         | 1,057,299 | 148,692,131   | 0.0071 | 11.0 | 939,026   | 1.77 | 104,553 | 0.06 | 13,720  |
| 13 | Russian Federation | 990,798   | 141,920,000   | 0.0070 | 1.2  | 74,498    | 0.00 | Unknown | 1    | 916,300 |
| 14 | Uzbekistan         | 166,792   | 28,562,400    | 0.0058 | 12.0 | 97,702    | 0.00 | 0       | 0.1  | 69,090  |
| 15 | Morocco            | 184,114   | 31,951,412    | 0.0058 | 12.4 | 149,814   | 0.00 | Unknown | 0.1  | 34,300  |
| 16 | Ukraine            | 255,845   | 45,870,700    | 0.0056 | 0.8  | 20,645    | 0.00 | Unknown | 1.1  | 235,200 |
| 17 | Thailand           | 365,406   | 69,122,234    | 0.0053 | 1.9  | 237,657   | 0.50 | 10,149  | 1.3  | 117,600 |
| 18 | Vietnam            | 408,534   | 86,927,700    | 0.0047 | 2.3  | 111,515   | 0.13 | 32,418  | 0.4  | 264,600 |
| 19 | Malaysia           | 114,666   | 28,401,017    | 0.0040 | 1.0  | 16,176    | 0.17 | 490     | 0.5  | 98,000  |
| 20 | Brazil             | 728,402   | 194,946,470   | 0.0037 | 5.3  | 292,349   | 0.06 | 4,853   | 0.45 | 431,200 |
| 21 | Peru               | 106,711   | 29,076,512    | 0.0037 | 4.5  | 62,255    | 0.12 | 356     | 0.4  | 44,100  |
| 22 | Colombia           | 159,217   | 46,294,841    | 0.0034 | 4.1  | 65,031    | 0.07 | 2,067   | 0.5  | 92,120  |
| 23 | Mexico             | 321,228   | 113,423,047   | 0.0028 | 5.5  | 175,197   | 0.00 | 12      | 0.3  | 146,020 |
| 24 | Philippines        | 255,050   | 93,260,798    | 0.0027 | 6.7  | 226,838   | 0.05 | 7,633   | 0.06 | 20,580  |
| 25 | Argentina          | 106,812   | 40,412,376    | 0.0026 | 0.9  | 33,311    | 0.00 | 1       | 0.5  | 73,500  |
| 26 | China              | 1,766,094 | 1,337,825,000 | 0.0013 | 3.1  | 848,167   | 0.00 | 1,627   | 0.1  | 916,300 |
| 27 | Turkey             | 89,042    | 72,752,325    | 0.0012 | 1.3  | 82,672    | 0.00 | 0       | 0.06 | 6,370   |

**Total DALY burden:** Total annual DALYs for diarrhea, malaria and HIV/AIDS. Source: calculated as sum of DALYs across the 3 diseases.

**Population:** Total country population, 2010 data. Source: World Bank - <http://data.worldbank.org/indicator/SP.POP.TOTL>

**DALYs per capita:** DALYs per person, calculated as total DALY burden, diarrheal disease divided by population.

**Diarrhea burden:** percentage of childhood (<5) deaths due to diarrhea. Source: Black et al, Global, regional, and national causes of child mortality in 2008: a systematic analysis. Lancet 2010.

**Annual deaths:** Total number of deaths from diarrheal disease in children <5 yrs. Source: Black et al, Global, regional, and national causes of child mortality in 2008: a systematic analysis. Lancet 2010.

**DALYs (Diarrhea):** Total DALYs from diarrheal disease in children < 5 yrs. Source: derivation.

**Malaria burden:** Percentage of childhood (<5) deaths due to malaria. Source: Black et al, Global, regional, and national causes of child mortality in 2008: a systematic analysis. Lancet 2010.

**DALYs (Malaria):** Total DALYs from malaria in children < 5 yrs. Source: derivation.

**HIV burden:** Prevalence in 15-49 year olds. Source: AIDSInfo database, via Gapminder.org

**DALYs (HIV):** Total DALYs from HIV/AIDS. Source: derivation.

Tech. Suppl. - Table 5. Results for Kenya, Bangladesh and Nigeria, per 1000 campaign participants.

|                              |                            | Malaria<br>LLITN | Diarrhea<br>Filters | HIV<br>VCT | Condoms  | TOTAL      |
|------------------------------|----------------------------|------------------|---------------------|------------|----------|------------|
| <b>Kenya</b>                 |                            |                  |                     |            |          |            |
| <b>Disease averted</b>       | Deaths                     | 1.6              | 2.4                 | 4.8        | 2.2      | 10.9       |
|                              | Episodes                   | 133.6            | 1,877.7             | 7.0        |          | 2,018.3    |
| <b>DALYs averted</b>         | Prevention                 | 44.1             | 68.3                | 40.0       | 18.2     | 170.6      |
|                              | Earlier HIV care           |                  |                     | 123.5      |          | 123.5      |
|                              | TOTAL                      | 44.1             | 68.3                | 181.8      |          | 294.1      |
| <b>Costs averted (added)</b> | Prevention                 | \$773            | \$9,068             | \$40,889   | \$18,588 | \$69,318   |
|                              | Earlier HIV care           |                  |                     | (\$81,187) |          | (\$81,187) |
|                              | TOTAL                      | \$773            | \$9,068             | (\$21,710) |          | -\$11,869  |
| <b>Cost-effectiveness</b>    | Campaign cost (unadjusted) |                  |                     |            |          | \$34,280   |
|                              | Net cost (savings)         |                  |                     |            |          | \$46,149   |
|                              | Cost per DALY averted      |                  |                     |            |          | \$157      |
| <b>Bangladesh</b>            |                            |                  |                     |            |          |            |
| <b>Disease averted</b>       | Deaths                     | 0.1              | 0.8                 | 0.0        | 0.0      | 0.9        |
|                              | Episodes                   | 14.7             | 1061.3              | 0.1        |          | 1076.1     |
| <b>DALYs averted</b>         | Prevention                 | 1.7              | 22.4                | 0.4        | 0.2      | 24.7       |
|                              | Earlier HIV care           |                  |                     | 1.2        |          | 1.2        |
|                              | TOTAL                      | 1.7              | 22.4                | 1.8        |          | 25.9       |
| <b>Costs averted (added)</b> | Prevention                 | \$89             | \$5,527             | \$389      | \$189    | \$6,196    |
|                              | Earlier HIV care           |                  |                     | (\$773)    |          | (\$773)    |
|                              | TOTAL                      | \$89             | \$5,527             | (\$195)    |          | \$5,422    |
| <b>Cost-effectiveness</b>    | Campaign cost (unadjusted) |                  |                     |            |          | \$36,658   |
|                              | Net cost (savings)         |                  |                     |            |          | \$30,236   |
|                              | Cost per DALY averted      |                  |                     |            |          | \$1,168    |
| <b>Nigeria</b>               |                            |                  |                     |            |          |            |
| <b>Disease averted</b>       | Deaths                     | 6.0              | 3.4                 | 2.7        | 1.3      | 13.4       |
|                              | Episodes                   | 734.3            | 2,363.3             | 4.0        |          | 3,101.7    |
| <b>DALYs averted</b>         | Prevention                 | 168.8            | 97.6                | 21.8       | 10.2     | 298.4      |

|    |                              |                            |         |          |           |          |            |
|----|------------------------------|----------------------------|---------|----------|-----------|----------|------------|
| 1  |                              | Earlier HIV care           |         |          | 70.8      | 70.8     |            |
| 2  |                              | TOTAL                      | 168.8   | 97.6     | 102.9     | 369.3    |            |
| 3  |                              |                            |         |          |           |          |            |
| 4  | <b>Costs averted (added)</b> | Prevention                 | \$6,223 | \$14,300 | \$28,605  | \$13,379 | \$62,507   |
| 5  |                              |                            |         |          |           |          |            |
| 6  |                              | Earlier HIV care           |         |          | (\$55,797 |          | (\$55,797) |
| 7  |                              |                            |         | )        |           |          |            |
| 8  |                              | TOTAL                      | \$6,223 | \$14,300 | (\$14,813 |          | \$5,710    |
| 9  |                              |                            |         | )        |           |          |            |
| 10 |                              |                            |         |          |           |          |            |
| 11 | <b>Cost-effectiveness</b>    | Campaign cost (unadjusted) |         |          |           |          | \$40,479   |
| 12 |                              | Net cost (savings)         |         |          |           |          | \$34,769   |
| 13 |                              | Cost per DALY averted      |         |          |           |          |            |
| 14 |                              |                            |         |          |           |          |            |
| 15 |                              |                            |         |          |           |          |            |
| 16 |                              |                            |         |          |           |          |            |
| 17 |                              |                            |         |          |           |          |            |
| 18 |                              |                            |         |          |           |          |            |
| 19 |                              |                            |         |          |           |          |            |
| 20 |                              |                            |         |          |           |          |            |
| 21 |                              |                            |         |          |           |          |            |
| 22 |                              |                            |         |          |           |          |            |
| 23 |                              |                            |         |          |           |          |            |
| 24 |                              |                            |         |          |           |          |            |
| 25 |                              |                            |         |          |           |          |            |
| 26 |                              |                            |         |          |           |          |            |
| 27 |                              |                            |         |          |           |          |            |
| 28 |                              |                            |         |          |           |          |            |
| 29 |                              |                            |         |          |           |          |            |
| 30 |                              |                            |         |          |           |          |            |
| 31 |                              |                            |         |          |           |          |            |
| 32 |                              |                            |         |          |           |          |            |
| 33 |                              |                            |         |          |           |          |            |
| 34 |                              |                            |         |          |           |          |            |
| 35 |                              |                            |         |          |           |          |            |
| 36 |                              |                            |         |          |           |          |            |
| 37 |                              |                            |         |          |           |          |            |
| 38 |                              |                            |         |          |           |          |            |
| 39 |                              |                            |         |          |           |          |            |
| 40 |                              |                            |         |          |           |          |            |
| 41 |                              |                            |         |          |           |          |            |
| 42 |                              |                            |         |          |           |          |            |
| 43 |                              |                            |         |          |           |          |            |
| 44 |                              |                            |         |          |           |          |            |
| 45 |                              |                            |         |          |           |          |            |
| 46 |                              |                            |         |          |           |          |            |
| 47 |                              |                            |         |          |           |          |            |
| 48 |                              |                            |         |          |           |          |            |
| 49 |                              |                            |         |          |           |          |            |
| 50 |                              |                            |         |          |           |          |            |
| 51 |                              |                            |         |          |           |          |            |
| 52 |                              |                            |         |          |           |          |            |
| 53 |                              |                            |         |          |           |          |            |
| 54 |                              |                            |         |          |           |          |            |
| 55 |                              |                            |         |          |           |          |            |
| 56 |                              |                            |         |          |           |          |            |
| 57 |                              |                            |         |          |           |          |            |
| 58 |                              |                            |         |          |           |          |            |
| 59 |                              |                            |         |          |           |          |            |
| 60 |                              |                            |         |          |           |          |            |

**Tech. Suppl. - Table 6.** Annual and cumulative results for campaigns 1 and 2 for Kenya, projected for 30 years. Assumes the second campaign starts 3 years after initial campaign. All outcomes discounted at 3% per annum.

| Year | Annual    |                   | Cumulative |               |                      | Annual DALYs averted |          |      |       | Cumulative DALYs averted |              |       |       |
|------|-----------|-------------------|------------|---------------|----------------------|----------------------|----------|------|-------|--------------------------|--------------|-------|-------|
|      | Net costs | Net DALYs averted | Net costs  | DALYs averted | CE (\$/DALY averted) | Malari<br>a          | Diarrhea | HIV  | Total | Malari<br>a              | Diarrh<br>ea | HIV   | Total |
| 1    | \$20,151  | 5.2               | \$20,151   | 5.2           | \$3,856              | 1.7                  | 3.2      | 0.3  | 5.2   | 1.7                      | 3.2          | 0.3   | 5.2   |
| 2    | \$4,168   | 6.0               | \$24,318   | 11.3          | \$2,161              | 1.6                  | 3.0      | 1.4  | 6.0   | 3.3                      | 6.2          | 1.7   | 11.3  |
| 3    | \$2,700   | 7.1               | \$27,019   | 18.3          | \$1,475              | 1.6                  | 2.9      | 2.6  | 7.1   | 4.9                      | 9.1          | 4.3   | 18.3  |
| 4    | \$27,259  | 11.6              | \$54,278   | 29.9          | \$1,817              | 1.9                  | 4.7      | 4.9  | 11.6  | 6.9                      | 13.8         | 9.2   | 29.9  |
| 5    | \$1,996   | 11.5              | \$56,274   | 41.4          | \$1,360              | 1.9                  | 4.5      | 5.1  | 11.5  | 8.7                      | 18.3         | 14.3  | 41.4  |
| 6    | \$2,136   | 11.5              | \$58,410   | 52.9          | \$1,104              | 1.8                  | 4.4      | 5.4  | 11.5  | 10.5                     | 22.7         | 19.7  | 52.9  |
| 7    | \$1,878   | 11.5              | \$60,288   | 64.4          | \$936                | 1.7                  | 3.9      | 5.9  | 11.5  | 12.2                     | 26.6         | 25.6  | 64.4  |
| 8    | \$874     | 11.2              | \$61,162   | 75.6          | \$809                | 1.7                  | 3.8      | 5.8  | 11.2  | 13.9                     | 30.3         | 31.4  | 75.6  |
| 9    | \$1,668   | 10.9              | \$62,830   | 86.5          | \$727                | 1.6                  | 3.7      | 5.6  | 10.9  | 15.5                     | 34.0         | 37.0  | 86.5  |
| 10   | \$1,786   | 10.6              | \$64,616   | 97.0          | \$666                | 1.6                  | 3.5      | 5.5  | 10.6  | 17.1                     | 37.5         | 42.4  | 97.0  |
| 11   | \$1,896   | 11.3              | \$66,511   | 108.3         | \$614                | 1.5                  | 3.4      | 6.3  | 11.3  | 18.6                     | 41.0         | 48.7  | 108.3 |
| 12   | \$2,149   | 12.0              | \$68,661   | 120.3         | \$571                | 1.5                  | 3.3      | 7.2  | 12.0  | 20.0                     | 44.3         | 55.9  | 120.3 |
| 13   | \$2,239   | 12.7              | \$70,900   | 133.0         | \$533                | 1.4                  | 3.2      | 8.0  | 12.7  | 21.5                     | 47.6         | 63.9  | 133.0 |
| 14   | \$2,100   | 14.3              | \$73,000   | 147.3         | \$496                | 1.4                  | 3.1      | 9.8  | 14.3  | 22.9                     | 50.7         | 73.7  | 147.3 |
| 15   | \$1,967   | 17.4              | \$74,967   | 164.7         | \$455                | 1.3                  | 3.1      | 13.0 | 17.4  | 24.2                     | 53.8         | 86.7  | 164.7 |
| 16   | \$1,840   | 17.2              | \$76,807   | 181.9         | \$422                | 1.3                  | 3.0      | 12.9 | 17.2  | 25.5                     | 56.7         | 99.7  | 181.9 |
| 17   | \$1,651   | 16.8              | \$78,458   | 198.8         | \$395                | 1.3                  | 2.9      | 12.7 | 16.8  | 26.8                     | 59.6         | 112.3 | 198.8 |
| 18   | \$1,471   | 16.6              | \$79,929   | 215.3         | \$371                | 1.2                  | 2.8      | 12.5 | 16.6  | 28.0                     | 62.4         | 124.9 | 215.3 |
| 19   | \$1,301   | 14.7              | \$81,230   | 230.1         | \$353                | 1.2                  | 2.7      | 10.8 | 14.7  | 29.2                     | 65.1         | 135.7 | 230.1 |
| 20   | \$1,139   | 14.4              | \$82,368   | 244.5         | \$337                | 1.2                  | 2.6      | 10.6 | 14.4  | 30.4                     | 67.8         | 146.3 | 244.5 |
| 21   | \$985     | 12.7              | \$83,354   | 257.2         | \$324                | 1.1                  | 2.6      | 9.0  | 12.7  | 31.5                     | 70.3         | 155.3 | 257.2 |
| 22   | \$840     | 8.8               | \$84,193   | 266.0         | \$317                | 1.1                  | 2.5      | 5.2  | 8.8   | 32.6                     | 72.8         | 160.6 | 266.0 |
| 23   | \$702     | 8.2               | \$84,895   | 274.2         | \$310                | 1.1                  | 2.4      | 4.8  | 8.2   | 33.7                     | 75.2         | 165.3 | 274.2 |
| 24   | \$571     | 7.8               | \$85,466   | 282.1         | \$303                | 1.0                  | 2.3      | 4.5  | 7.8   | 34.7                     | 77.6         | 169.8 | 282.1 |
| 25   | \$2,188   | 6.8               | \$87,653   | 288.9         | \$303                | 1.0                  | 2.3      | 3.5  | 6.8   | 35.7                     | 79.8         | 173.3 | 288.9 |
| 26   | \$2,020   | 6.6               | \$89,673   | 295.5         | \$304                | 1.0                  | 2.2      | 3.4  | 6.6   | 36.7                     | 82.1         | 176.7 | 295.5 |
| 27   | \$106     | 6.4               | \$89,779   | 301.9         | \$297                | 0.9                  | 2.1      | 3.3  | 6.4   | 37.6                     | 84.2         | 180.0 | 301.9 |
| 28   | \$617     | 6.2               | \$90,396   | 308.1         | \$293                | 0.9                  | 2.1      | 3.2  | 6.2   | 38.6                     | 86.3         | 183.3 | 308.1 |
| 29   | \$575     | 6.0               | \$90,971   | 314.1         | \$290                | 0.9                  | 2.0      | 3.1  | 6.0   | 39.4                     | 88.3         | 186.4 | 314.1 |
| 30   | \$0       | 5.9               | \$90,971   | 320.0         | \$284                | 0.9                  | 2.0      | 3.0  | 5.9   | 40.3                     | 90.3         | 189.4 | 320.0 |

**Tech. Suppl. - Table 7.** Country-specific estimates for unit costs of antiretroviral therapy for HIV adjusted to 2012 US\$. In countries with multiple estimate, the mean is shown.

| ART UNIT COSTS |                                 |                                                                    |
|----------------|---------------------------------|--------------------------------------------------------------------|
| Country        | ART per person-year (2012 US\$) | Sources                                                            |
| Benin          | \$701                           | Hounton et al. 2008                                                |
| Botswana       | \$703                           | Menzies, 2011                                                      |
| Brazil         | \$1,786                         | Acurcio, 2006 (Cited in Galarraga 2011)                            |
| Ethiopia       | \$610                           | Menzies 2011; Bikilla et al. 2009;                                 |
| Haiti          | \$1,120                         | Koenig 2008                                                        |
| India          | \$230                           | Gupta 2009                                                         |
| Lesotho        | \$165                           | Cleary 2006                                                        |
| Mexico         | \$5,990                         | Bautista 2003; Bautista 2008; Aracena-Genao                        |
| Morocco        | \$1,102                         | Loubiere 2008 (Cited in Galarraga 2011)                            |
| Nigeria        | \$938                           | Menzies, 2011; Kombe 2004                                          |
| South Africa   | \$1,260                         | Cleary 2006; Kevany 2009; Deghaye 2006; Martinson 2009; Rosen 2008 |
| Thailand       | \$3,994                         | Kitajima 2003                                                      |
| Uganda         | \$805                           | Marseille 2009; Jaffar 2009                                        |
| Zambia         | \$794                           | Marseille 2012                                                     |
| Vietnam        | \$964                           | Menzies, 2011                                                      |

1 **Methods for estimating health care and campaign costs.**

2 There is no recognized “gold standard” for adjusting program and health care costs by country. While per-capita  
3 GDP reflects overall ability to pay, it assumes that health care is a normal good in which consumption increases  
4 monotonically with income. A per-capita GDP-based index also lacks the specificity to capture both the unit cost  
5 and the relevant quantity utilized of various health inputs, such as inpatient days or outpatient visits. These  
6 utilization patterns can vary by country partially independently of income. An alternative index is per-capita  
7 spending on health care. This is a more direct measure of overall health care spending, but also fails to capture the  
8 detailed inputs cost and utilization mix. Finally, WHO-CHOICE provides country-specific costs for inpatient days  
9 and outpatient visits at various levels of facilities (e.g. primary, secondary, and teaching hospitals). By comparing  
10 the WHO-CHOICE-derived costs for Kenya against the other 69 countries, yet a third index can be created.<sup>8</sup>  
11 However, the WHO-CHOICE-based index has its own short-comings. In addition to not reflecting the specific mix  
12 of inputs needed for the present analysis, the methods used to derive the costs are somewhat opaque. The  
13 regression model used to predict country health care costs includes per-capita GDP and may thus be similar to  
14 using a per-capita GDP-based index. Table 8 shows the base-case results using the per-capita health care spending  
15 approach; and Table 9 uses the index derived from WHO-CHOICE. These show very little difference in the cost-  
16 effectiveness results by country rankings when compared with the per-capita GDP approach shown in Table 3 in  
17 the main paper.  
18  
19  
20  
21  
22  
23  
24  
25  
26  
27  
28  
29  
30  
31  
32  
33  
34  
35  
36  
37  
38  
39  
40  
41  
42  
43  
44  
45  
46  
47  
48  
49  
50  
51  
52  
53  
54  
55  
56  
57  
58  
59  
60

**Table 8.** Summary costs and cost-effectiveness results per 1,000 IPC participants for 70 countries ordered from highest to lowest cost-effectiveness. Grey cells indicate cost-effectiveness ratios less favorable than investment in ART. Results shown are for the first 3-year campaign. Non-tradable portion of costs imputed from Kenya trial data based on per-capita health care spending. Sources: WHO, World Health Statistics 2012, <http://apps.who.int/gho/data/node.main.78?lang=en>. Definitions: Health Expenditure per-capita (PPP; International \$): The sum of public and private health expenditure (in PPP, International \$) divided by population. Health expenditure includes the provision of health services, family planning activities, nutrition activities and emergency aid designated for health, but excludes the provision of water and sanitation.

|    | Country           | World Bank income classification | DALYs per capita | Costs             |          | Disease averted |          |         | Cost-effectiveness (CE)        |                           |           |
|----|-------------------|----------------------------------|------------------|-------------------|----------|-----------------|----------|---------|--------------------------------|---------------------------|-----------|
|    |                   |                                  |                  | IPC campaign cost | Net cost | Deaths          | Episodes |         | Campaign cost per DALY averted | Net cost per DALY averted | CE of ART |
| 1  | Guinea-Bissau     | Low                              | 0.134            | \$31,652          | \$2,286  | 40.7            | 10,523   | 1,145.2 | \$28                           | \$2                       | \$1,005   |
| 2  | Sierra Leone      | Low                              | 0.119            | \$52,305          | \$4,927  | 16.0            | 4,118    | 447.9   | \$117                          | \$11                      | \$764     |
| 3  | Senegal           | Lower middle                     | 0.050            | \$36,210          | \$11,527 | 10.7            | 5,735    | 305.4   | \$119                          | \$38                      | \$768     |
| 4  | Burkina Faso      | Low                              | 0.126            | \$35,260          | \$20,805 | 16.4            | 4,124    | 459.8   | \$77                           | \$45                      | \$819     |
| 5  | Somalia           | Low                              | 0.121            | \$26,015          | \$22,924 | 16.8            | 3,682    | 470.8   | \$55                           | \$49                      | \$1,535   |
| 6  | Mali              | Low                              | 0.124            | \$32,840          | \$22,058 | 15.9            | 4,222    | 445.4   | \$74                           | \$50                      | \$888     |
| 7  | Niger             | Low                              | 0.110            | \$28,445          | \$21,450 | 14.8            | 4,967    | 419.1   | \$68                           | \$51                      | \$1,095   |
| 8  | Afghanistan       | Low                              | 0.057            | \$28,905          | \$18,828 | 12.7            | 4,146    | 356.9   | \$81                           | \$53                      | \$935     |
| 9  | Sudan             | Lower middle                     | 0.057            | \$45,505          | \$10,906 | 6.9             | 4,907    | 198.4   | \$229                          | \$55                      | \$703     |
| 10 | Guinea            | Low                              | 0.095            | \$31,875          | \$21,102 | 12.6            | 4,272    | 355.2   | \$90                           | \$59                      | \$928     |
| 11 | Lesotho           | Lower middle                     | 0.115            | \$55,557          | \$54,805 | 31.3            | 1,756    | 859.0   | \$65                           | \$64                      | \$738     |
| 12 | Congo, DR         | Low                              | 0.112            | \$25,386          | \$25,306 | 13.4            | 3,517    | 376.8   | \$67                           | \$67                      | \$1,493   |
| 13 | Chad              | Low                              | 0.120            | \$28,103          | \$29,728 | 15.3            | 4,335    | 427.1   | \$66                           | \$70                      | \$807     |
| 14 | Liberia           | Low                              | 0.092            | \$36,982          | \$23,225 | 11.9            | 3,401    | 333.2   | \$111                          | \$70                      | \$1,025   |
| 15 | Côte d'Ivoire     | Lower middle                     | 0.084            | \$43,278          | \$30,730 | 14.1            | 4,021    | 393.7   | \$110                          | \$78                      | \$801     |
| 16 | Burundi           | Low                              | 0.118            | \$28,504          | \$34,224 | 14.3            | 2,267    | 393.6   | \$72                           | \$87                      | \$987     |
| 17 | Uganda            | Low                              | 0.105            | \$37,888          | \$36,726 | 14.9            | 3,492    | 409.5   | \$93                           | \$90                      | \$749     |
| 18 | Benin             | Low                              | 0.083            | \$32,216          | \$25,362 | 10.0            | 3,096    | 280.0   | \$115                          | \$91                      | \$910     |
| 19 | Nigeria           | Lower middle                     | 0.133            | \$45,846          | \$34,213 | 13.4            | 3,102    | 370.6   | \$124                          | \$92                      | \$747     |
| 20 | Mozambique        | Low                              | 0.141            | \$31,652          | \$58,371 | 22.2            | 3,816    | 606.8   | \$52                           | \$96                      | \$1,109   |
| 21 | Ken. African Rep. | Low                              | 0.105            | \$26,663          | \$37,686 | 13.8            | 2,819    | 380.3   | \$70                           | \$99                      | \$1,230   |
| 22 | Congo, Rep.       | Lower middle                     | 0.067            | \$42,684          | \$33,709 | 11.5            | 2,981    | 319.7   | \$134                          | \$105                     | \$756     |
| 23 | Togo              | Low                              | 0.075            | \$32,973          | \$32,220 | 10.4            | 2,849    | 287.6   | \$115                          | \$112                     | \$864     |
| 24 | Zambia            | Lower middle                     | 0.128            | \$38,512          | \$68,361 | 21.8            | 3,107    | 594.6   | \$65                           | \$115                     | \$826     |
| 25 | Malawi            | Low                              | 0.110            | \$34,146          | \$58,110 | 18.3            | 2,965    | 496.4   | \$69                           | \$117                     | \$996     |
| 26 | Tanzania          | Low                              | 0.075            | \$30,345          | \$39,174 | 12.1            | 3,122    | 331.0   | \$92                           | \$118                     | \$935     |
| 27 | Ethiopia          | Low                              | 0.057            | \$28,371          | \$28,810 | 8.6             | 1,986    | 237.4   | \$120                          | \$121                     | \$1,139   |



|    |   |                  |              |       |           |           |      |       |       |         |         |         |
|----|---|------------------|--------------|-------|-----------|-----------|------|-------|-------|---------|---------|---------|
| 1  | 2 | Angola           | Upper middle | 0.088 | \$53,374  | \$39,069  | 11.5 | 3,268 | 321.5 | \$166   | \$122   | \$674   |
| 2  | 8 |                  |              |       |           |           |      |       |       |         |         |         |
| 3  | 2 | Cameroon         | Lower middle | 0.100 | \$39,729  | \$52,377  | 14.3 | 3,115 | 394.2 | \$101   | \$133   | \$741   |
| 4  | 9 |                  |              |       |           |           |      |       |       |         |         |         |
| 5  | 3 | Rwanda           | Low          | 0.071 | \$43,307  | \$37,051  | 9.6  | 2,216 | 265.0 | \$163   | \$140   | \$768   |
| 6  | 0 |                  |              |       |           |           |      |       |       |         |         |         |
| 7  | 3 | Kenya            | Low          | 0.065 | \$34,280  | \$46,149  | 10.9 | 2,018 | 294.1 | \$117   | \$157   | \$883   |
| 8  | 1 |                  |              |       |           |           |      |       |       |         |         |         |
| 9  | 3 | Zimbabwe         | Low          | 0.075 | \$25,326  | \$76,203  | 17.8 | 1,682 | 478.9 | \$53    | \$159   | \$1,731 |
| 10 | 2 |                  |              |       |           |           |      |       |       |         |         |         |
| 11 | 3 | Yemen            | Lower middle | 0.025 | \$39,388  | \$20,853  | 4.3  | 3,128 | 122.6 | \$321   | \$170   | \$719   |
| 12 | 3 | Mauritania       | Lower middle | 0.042 | \$39,952  | \$29,100  | 5.8  | 2,607 | 164.0 | \$244   | \$177   | \$955   |
| 13 | 4 |                  |              |       |           |           |      |       |       |         |         |         |
| 14 | 3 | Ghana            | Lower middle | 0.063 | \$37,606  | \$34,488  | 6.8  | 1,966 | 189.9 | \$198   | \$182   | \$746   |
| 15 | 5 |                  |              |       |           |           |      |       |       |         |         |         |
| 16 | 3 | Pakistan         | Lower middle | 0.020 | \$35,334  | \$20,601  | 3.8  | 2,748 | 108.0 | \$327   | \$191   | \$904   |
| 17 | 6 |                  |              |       |           |           |      |       |       |         |         |         |
| 18 | 3 | Madagascar       | Low          | 0.043 | \$27,806  | \$24,564  | 4.5  | 1,910 | 127.6 | \$218   | \$192   | \$1,025 |
| 19 | 7 |                  |              |       |           |           |      |       |       |         |         |         |
| 20 | 3 | Eritrea          | Low          | 0.033 | \$24,332  | \$25,362  | 4.3  | 1,942 | 119.5 | \$204   | \$212   | \$1,753 |
| 21 | 8 |                  |              |       |           |           |      |       |       |         |         |         |
| 22 | 3 | Swaziland        | Lower middle | 0.150 | \$88,325  | \$197,225 | 29.1 | 2,230 | 800.0 | \$110   | \$247   | \$632   |
| 23 | 9 |                  |              |       |           |           |      |       |       |         |         |         |
| 24 | 4 | Haiti            | Low          | 0.028 | \$34,310  | \$31,765  | 4.4  | 3,128 | 121.7 | \$282   | \$261   | \$869   |
| 25 | 0 |                  |              |       |           |           |      |       |       |         |         |         |
| 26 | 4 | Botswana         | Upper middle | 0.080 | \$151,324 | \$196,117 | 26.8 | 1,111 | 734.1 | \$206   | \$267   | \$577   |
| 27 | 1 |                  |              |       |           |           |      |       |       |         |         |         |
| 28 | 4 | Guatemala        | Lower middle | 0.016 | \$76,551  | \$19,936  | 2.4  | 3,143 | 68.3  | \$1,121 | \$292   | \$627   |
| 29 | 2 |                  |              |       |           |           |      |       |       |         |         |         |
| 30 | 4 | Myanmar          | Low          | 0.026 | \$25,550  | \$25,518  | 2.9  | 1,306 | 83.1  | \$307   | \$307   | \$1,354 |
| 31 | 3 |                  |              |       |           |           |      |       |       |         |         |         |
| 32 | 4 | India            | Lower middle | 0.027 | \$45,178  | \$33,274  | 3.7  | 1,255 | 104.6 | \$432   | \$318   | \$733   |
| 33 | 4 |                  |              |       |           |           |      |       |       |         |         |         |
| 34 | 4 | Papua New Guinea | Lower middle | 0.018 | \$44,272  | \$24,760  | 2.4  | 2,868 | 70.6  | \$627   | \$351   | \$864   |
| 35 | 5 |                  |              |       |           |           |      |       |       |         |         |         |
| 36 | 4 | South Africa     | Upper middle | 0.097 | \$167,731 | \$223,292 | 21.5 | 1,150 | 579.7 | \$289   | \$385   | \$582   |
| 37 | 6 |                  |              |       |           |           |      |       |       |         |         |         |
| 38 | 4 | Gabon            | Upper middle | 0.060 | \$104,762 | \$107,288 | 9.3  | 1,876 | 251.5 | \$417   | \$427   | \$613   |
| 39 | 7 |                  |              |       |           |           |      |       |       |         |         |         |
| 40 | 4 | Iraq             | Upper middle | 0.009 | \$43,990  | \$25,081  | 1.9  | 2,587 | 55.5  | \$792   | \$452   | \$758   |
| 41 | 8 |                  |              |       |           |           |      |       |       |         |         |         |
| 42 | 4 | Namibia          | Upper middle | 0.038 | \$113,745 | \$218,642 | 15.6 | 1,528 | 416.7 | \$273   | \$525   | \$606   |
| 43 | 9 |                  |              |       |           |           |      |       |       |         |         |         |
| 44 | 5 | Cambodia         | Low          | 0.014 | \$41,971  | \$32,821  | 1.9  | 1,341 | 53.9  | \$779   | \$609   | \$739   |
| 45 | 0 |                  |              |       |           |           |      |       |       |         |         |         |
| 46 | 5 | Nepal            | Low          | 0.010 | \$33,760  | \$30,891  | 1.4  | 1,135 | 39.2  | \$861   | \$788   | \$883   |
| 47 | 1 |                  |              |       |           |           |      |       |       |         |         |         |
| 48 | 5 | Morocco          | Lower middle | 0.006 | \$72,424  | \$50,688  | 1.9  | 1,623 | 54.5  | \$1,329 | \$930   | \$650   |
| 49 | 2 |                  |              |       |           |           |      |       |       |         |         |         |
| 50 | 5 | Bangladesh       | Low          | 0.007 | \$31,949  | \$28,039  | 0.9  | 1,076 | 25.8  | \$1,237 | \$1,086 | \$1,046 |
| 51 | 3 |                  |              |       |           |           |      |       |       |         |         |         |
| 52 | 5 | Algeria          | Upper middle | 0.008 | \$87,063  | \$59,839  | 1.4  | 1,304 | 40.8  | \$2,136 | \$1,468 | \$606   |
| 53 | 4 |                  |              |       |           |           |      |       |       |         |         |         |
| 54 | 5 | Uzbekistan       | Lower middle | 0.006 | \$54,666  | \$26,791  | 0.6  | 2,352 | 18.1  | \$3,021 | \$1,481 | \$717   |
| 55 | 5 |                  |              |       |           |           |      |       |       |         |         |         |
| 56 | 5 | Indonesia        | Lower middle | 0.008 | \$44,169  | \$38,316  | 0.7  | 814   | 20.5  | \$2,158 | \$1,872 | \$793   |
| 57 | 6 |                  |              |       |           |           |      |       |       |         |         |         |
| 58 | 5 | Thailand         | Upper middle | 0.005 | \$79,120  | \$90,878  | 1.8  | 455   | 46.5  | \$1,700 | \$1,952 | \$622   |
| 59 | 7 |                  |              |       |           |           |      |       |       |         |         |         |
| 60 | 5 | Bolivia          | Lower middle | 0.010 | \$67,123  | \$33,507  | 0.4  | 2,015 | 13.1  | \$5,105 | \$2,549 | \$668   |
| 61 | 8 |                  |              |       |           |           |      |       |       |         |         |         |
| 62 | 5 | Vietnam          | Lower middle | 0.005 | \$51,726  | \$44,913  | 0.6  | 828   | 16.7  | \$3,102 | \$2,694 | \$664   |
| 63 | 9 |                  |              |       |           |           |      |       |       |         |         |         |
| 64 | 6 | Ukraine          | Lower middle | 0.006 | \$105,326 | \$92,351  | 1.2  | 623   | 32.8  | \$3,209 | \$2,814 | \$600   |
| 65 | 0 |                  |              |       |           |           |      |       |       |         |         |         |
| 66 | 6 | Peru             | Upper middle | 0.004 | \$104,227 | \$63,328  | 0.6  | 1,497 | 17.8  | \$5,864 | \$3,563 | \$613   |
| 67 | 1 |                  |              |       |           |           |      |       |       |         |         |         |
| 68 | 6 | Philippines      | Lower middle | 0.003 | \$51,949  | \$39,286  | 0.3  | 1,289 | 10.8  | \$4,832 | \$3,654 | \$724   |
| 69 | 2 |                  |              |       |           |           |      |       |       |         |         |         |

|   |                    |               |       |           |           |     |       |      |          |          |       |
|---|--------------------|---------------|-------|-----------|-----------|-----|-------|------|----------|----------|-------|
| 6 | Colombia           | Upper middle  | 0.003 | \$129,275 | \$80,234  | 0.6 | 1,419 | 18.7 | \$6,900  | \$4,283  | \$598 |
| 3 | Malaysia           | Upper middle  | 0.004 | \$122,297 | \$93,832  | 0.6 | 930   | 16.5 | \$7,428  | \$5,699  | \$591 |
| 4 | Brazil             | Upper middle  | 0.004 | \$186,498 | \$105,365 | 0.6 | 1,385 | 18.1 | \$10,306 | \$5,822  | \$581 |
| 6 | Russian Federation | High: nonOECD | 0.007 | \$240,707 | \$192,690 | 1.1 | 735   | 30.2 | \$7,975  | \$6,384  | \$579 |
| 6 | Argentina          | Upper middle  | 0.003 | \$252,229 | \$164,213 | 0.6 | 1,097 | 16.6 | \$15,161 | \$9,871  | \$577 |
| 6 | Turkey             | Upper middle  | 0.001 | \$191,725 | \$80,928  | 0.1 | 1,784 | 5.9  | \$32,276 | \$13,624 | \$582 |
| 6 | China              | Upper middle  | 0.001 | \$93,151  | \$81,634  | 0.1 | 486   | 4.4  | \$20,990 | \$18,395 | \$638 |
| 7 | Mexico             | Upper middle  | 0.003 | \$179,550 | \$187,187 | 0.3 | 0     | 8.7  | \$20,612 | \$21,489 | \$583 |

For peer review only

**Tech. Suppl. - Table 9.** Summary costs and cost-effectiveness results per 1,000 IPC participants for 70 countries ordered from highest to lowest cost-effectiveness. Grey cells indicate cost-effectiveness ratios less favorable than investment in ART. Results shown are for the first 3-year campaign. Non-tradable portion of costs imputed from Kenya trial data based on WHO-CHOICE data on costs for inpatient day and outpatient visit assuming 75% of costs are for outpatient; 25% for inpatient. Source: WHO-CHOICE: [http://www.who.int/choice/cost-effectiveness/inputs/health\\_service/en/](http://www.who.int/choice/cost-effectiveness/inputs/health_service/en/)

|    | Country           | World Bank income classification | DALYs per capita | Costs             |          | Disease averted |          | DALYs averted | Cost-effectiveness (CE)        |                           |           |
|----|-------------------|----------------------------------|------------------|-------------------|----------|-----------------|----------|---------------|--------------------------------|---------------------------|-----------|
|    |                   |                                  |                  | IPC campaign cost | Net cost | Deaths          | Episodes |               | Campaign cost per DALY averted | Net cost per DALY averted | CE of ART |
| 1  | Guinea-Bissau     | Low                              | 0.134            | \$26,373          | \$17,367 | 40.7            | 10,523   | 1,145.2       | \$23                           | \$15                      | \$1,005   |
| 2  | Senegal           | Lower middle                     | 0.050            | \$36,106          | \$11,638 | 10.7            | 5,735    | 305.4         | \$118                          | \$38                      | \$768     |
| 3  | Burkina Faso      | Low                              | 0.126            | \$33,007          | \$21,650 | 16.4            | 4,124    | 459.8         | \$72                           | \$47                      | \$819     |
| 4  | Sierra Leone      | Low                              | 0.119            | \$28,338          | \$22,441 | 16.0            | 4,118    | 447.9         | \$63                           | \$50                      | #N/A      |
| 5  | Mali              | Low                              | 0.124            | \$31,186          | \$22,527 | 15.9            | 4,222    | 445.4         | \$70                           | \$51                      | \$888     |
| 6  | Niger             | Low                              | 0.110            | \$27,560          | \$21,862 | 14.8            | 4,967    | 419.1         | \$66                           | \$52                      | \$1,095   |
| 7  | Afghanistan       | Low                              | 0.057            | \$28,280          | \$19,188 | 12.7            | 4,146    | 356.9         | \$79                           | \$54                      | \$935     |
| 8  | Lesotho           | Lower middle                     | 0.115            | \$34,378          | \$46,888 | 31.3            | 1,756    | 859.0         | \$40                           | \$55                      | \$738     |
| 9  | Guinea            | Low                              | 0.095            | \$30,485          | \$21,805 | 12.6            | 4,272    | 355.2         | \$86                           | \$61                      | \$928     |
| 10 | Chad              | Low                              | 0.120            | \$32,650          | \$27,127 | 15.3            | 4,335    | 427.1         | \$76                           | \$64                      | \$807     |
| 11 | Congo, DR         | Low                              | 0.112            | \$24,540          | \$25,512 | 13.4            | 3,517    | 376.8         | \$65                           | \$68                      | \$1,493   |
| 12 | Liberia           | Low                              | 0.092            | \$25,154          | \$26,045 | 11.9            | 3,401    | 333.2         | \$75                           | \$78                      | \$1,025   |
| 13 | Sudan             | Lower middle                     | 0.057            | \$38,572          | \$15,919 | 6.9             | 4,907    | 198.4         | \$194                          | \$80                      | \$703     |
| 14 | Burundi           | Low                              | 0.118            | \$25,095          | \$33,564 | 14.3            | 2,267    | 393.6         | \$64                           | \$85                      | \$987     |
| 15 | Côte d'Ivoire     | Lower middle                     | 0.084            | \$34,943          | \$34,796 | 14.1            | 4,021    | 393.7         | \$89                           | \$88                      | \$801     |
| 16 | Benin             | Low                              | 0.083            | \$33,846          | \$25,342 | 10.0            | 3,096    | 280.0         | \$121                          | \$91                      | \$910     |
| 17 | Nigeria           | Lower middle                     | 0.133            | \$38,931          | \$34,929 | 13.4            | 3,102    | 370.6         | \$105                          | \$94                      | \$747     |
| 18 | Uganda            | Low                              | 0.105            | \$32,646          | \$39,581 | 14.9            | 3,492    | 409.5         | \$80                           | \$97                      | \$749     |
| 19 | Mozambique        | Low                              | 0.141            | \$28,771          | \$59,852 | 22.2            | 3,816    | 606.8         | \$47                           | \$99                      | \$1,109   |
| 20 | Cen. African Rep. | Low                              | 0.105            | \$28,010          | \$37,642 | 13.8            | 2,819    | 380.3         | \$74                           | \$99                      | \$1,230   |
| 21 | Congo, Rep.       | Lower middle                     | 0.067            | \$51,672          | \$33,891 | 11.5            | 2,981    | 319.7         | \$162                          | \$106                     | #N/A      |
| 22 | Togo              | Low                              | 0.075            | \$31,613          | \$32,267 | 10.4            | 2,849    | 287.6         | \$110                          | \$112                     | \$864     |
| 23 | Angola            | Upper middle                     | 0.088            | \$62,105          | \$37,627 | 11.5            | 3,268    | 321.5         | \$193                          | \$117                     | \$674     |
| 24 | Tanzania          | Low                              | 0.075            | \$32,091          | \$38,786 | 12.1            | 3,122    | 331.0         | \$97                           | \$117                     | \$935     |
| 25 | Zambia            | Lower middle                     | 0.128            | \$32,785          | \$70,043 | 21.8            | 3,107    | 594.6         | \$55                           | \$118                     | \$826     |
| 26 | Malawi            | Low                              | 0.110            | \$28,219          | \$59,708 | 18.3            | 2,965    | 496.4         | \$57                           | \$120                     | \$996     |
| 27 | Ethiopia          | Low                              | 0.057            | \$29,008          | \$29,104 | 8.6             | 1,986    | 237.4         | \$122                          | \$123                     | \$1,139   |
| 28 | Rwanda            | Low                              | 0.071            | \$30,681          | \$33,818 | 9.6             | 2,216    | 265.0         | \$116                          | \$128                     | \$768     |
| 29 | Cameroon          | Lower middle                     | 0.100            | \$39,111          | \$52,380 | 14.3            | 3,115    | 394.2         | \$99                           | \$133                     | \$741     |
| 30 | Kenya             | Low                              | 0.065            | \$34,280          | \$46,149 | 10.9            | 2,018    | 294.1         | \$117                          | \$157                     | \$883     |
| 31 | Yemen             | Lower middle                     | 0.025            | \$41,823          | \$20,557 | 4.3             | 3,128    | 122.6         | \$341                          | \$168                     | \$719     |
| 32 | Mauritania        | Lower middle                     | 0.042            | \$38,314          | \$28,653 | 5.8             | 2,607    | 164.0         | \$234                          | \$175                     | \$955     |
| 33 | Ghana             | Lower middle                     | 0.063            | \$33,612          | \$33,841 | 6.8             | 1,966    | 189.9         | \$177                          | \$178                     | \$746     |
| 34 | Pakistan          | Lower middle                     | 0.020            | \$40,398          | \$19,912 | 3.8             | 2,748    | 108.0         | \$374                          | \$184                     | \$904     |
| 35 | Madagascar        | Low                              | 0.043            | \$30,438          | \$25,467 | 4.5             | 1,910    | 127.6         | \$239                          | \$200                     | \$1,025   |
| 36 | Eritrea           | Low                              | 0.033            | \$26,867          | \$26,253 | 4.3             | 1,942    | 119.5         | \$225                          | \$220                     | \$1,753   |

|    |    |                    |               |       |           |           |      |       |       |          |          |         |
|----|----|--------------------|---------------|-------|-----------|-----------|------|-------|-------|----------|----------|---------|
| 1  | 37 | Botswana           | Upper middle  | 0.080 | \$116,424 | \$173,837 | 26.8 | 1,111 | 734.1 | \$159    | \$237    | \$577   |
| 2  | 38 | Swaziland          | Lower middle  | 0.150 | \$58,455  | \$198,389 | 29.1 | 2,230 | 800.0 | \$73     | \$248    | \$632   |
| 3  | 39 | Haiti              | Low           | 0.028 | \$30,962  | \$31,577  | 4.4  | 3,128 | 121.7 | \$254    | \$260    | \$869   |
| 4  | 40 | South Africa       | Upper middle  | 0.097 | \$93,433  | \$177,476 | 21.5 | 1,150 | 579.7 | \$161    | \$306    | \$582   |
| 5  | 41 | India              | Lower middle  | 0.027 | \$44,370  | \$32,889  | 3.7  | 1,255 | 104.6 | \$424    | \$314    | \$733   |
| 6  | 42 | Guatemala          | Lower middle  | 0.016 | \$57,311  | \$22,179  | 2.4  | 3,143 | 68.3  | \$839    | \$325    | \$627   |
| 7  | 43 | Myanmar            | Low           | 0.026 | \$31,316  | \$28,153  | 2.9  | 1,306 | 83.1  | \$377    | \$339    | \$1,354 |
| 8  | 44 | Papua New Guinea   | Lower middle  | 0.018 | \$39,103  | \$25,246  | 2.4  | 2,868 | 70.6  | \$554    | \$358    | \$864   |
| 9  | 45 | Gabon              | Upper middle  | 0.060 | \$56,344  | \$92,439  | 9.3  | 1,876 | 251.5 | \$224    | \$368    | \$613   |
| 10 | 46 | Iraq               | Upper middle  | 0.009 | \$47,126  | \$25,378  | 1.9  | 2,587 | 55.5  | \$848    | \$457    | \$758   |
| 11 | 47 | Namibia            | Upper middle  | 0.038 | \$68,440  | \$201,570 | 15.6 | 1,528 | 416.7 | \$164    | \$484    | \$606   |
| 12 | 48 | Cambodia           | Low           | 0.014 | \$38,523  | \$31,223  | 1.9  | 1,341 | 53.9  | \$715    | \$579    | \$739   |
| 13 | 49 | Nepal              | Low           | 0.010 | \$30,887  | \$29,027  | 1.4  | 1,135 | 39.2  | \$788    | \$740    | \$883   |
| 14 | 50 | Morocco            | Lower middle  | 0.006 | \$54,334  | \$40,545  | 1.9  | 1,623 | 54.5  | \$997    | \$744    | \$650   |
| 15 | 51 | Bangladesh         | Low           | 0.007 | \$32,639  | \$28,448  | 0.9  | 1,076 | 25.8  | \$1,264  | \$1,101  | \$1,046 |
| 16 | 52 | Algeria            | Upper middle  | 0.008 | \$80,074  | \$55,887  | 1.4  | 1,304 | 40.8  | \$1,965  | \$1,371  | \$606   |
| 17 | 53 | Uzbekistan         | Lower middle  | 0.006 | \$43,037  | \$25,245  | 0.6  | 2,352 | 18.1  | \$2,379  | \$1,395  | \$717   |
| 18 | 54 | Brazil             | Upper middle  | 0.004 | \$34,045  | \$31,218  | 0.6  | 1,385 | 18.1  | \$1,881  | \$1,725  | \$581   |
| 19 | 55 | Thailand           | Upper middle  | 0.005 | \$79,636  | \$91,299  | 1.8  | 455   | 46.5  | \$1,711  | \$1,961  | \$622   |
| 20 | 56 | Ukraine            | Lower middle  | 0.006 | \$74,578  | \$68,634  | 1.2  | 623   | 32.8  | \$2,272  | \$2,091  | \$600   |
| 21 | 57 | Indonesia          | Lower middle  | 0.008 | \$51,988  | \$43,696  | 0.7  | 814   | 20.5  | \$2,540  | \$2,135  | \$793   |
| 22 | 58 | Bolivia            | Lower middle  | 0.010 | \$53,963  | \$30,445  | 0.4  | 2,015 | 13.1  | \$4,105  | \$2,316  | \$668   |
| 23 | 59 | Vietnam            | Lower middle  | 0.005 | \$43,303  | \$39,035  | 0.6  | 828   | 16.7  | \$2,597  | \$2,341  | \$664   |
| 24 | 60 | Peru               | Upper middle  | 0.004 | \$82,397  | \$53,509  | 0.6  | 1,497 | 17.8  | \$4,636  | \$3,011  | \$613   |
| 25 | 61 | Philippines        | Lower middle  | 0.003 | \$48,596  | \$37,382  | 0.3  | 1,289 | 10.8  | \$4,520  | \$3,477  | \$724   |
| 26 | 62 | Colombia           | Upper middle  | 0.003 | \$124,448 | \$77,859  | 0.6  | 1,419 | 18.7  | \$6,643  | \$4,156  | \$598   |
| 27 | 63 | Russian Federation | High: nonOECD | 0.007 | \$156,317 | \$131,095 | 1.1  | 735   | 30.2  | \$5,179  | \$4,343  | \$579   |
| 28 | 64 | Argentina          | Upper middle  | 0.003 | \$119,219 | \$85,212  | 0.6  | 1,097 | 16.6  | \$7,166  | \$5,122  | \$577   |
| 29 | 65 | Malaysia           | Upper middle  | 0.004 | \$118,529 | \$91,339  | 0.6  | 930   | 16.5  | \$7,199  | \$5,548  | \$591   |
| 30 | 66 | Turkey             | Upper middle  | 0.001 | \$116,707 | \$55,139  | 0.1  | 1,784 | 5.9   | \$19,647 | \$9,283  | \$582   |
| 31 | 67 | China              | Upper middle  | 0.001 | \$66,612  | \$59,793  | 0.1  | 486   | 4.4   | \$15,010 | \$13,474 | \$638   |
| 32 | 68 | Mexico             | Upper middle  | 0.003 | \$120,196 | \$127,833 | 0.3  | 0     | 8.7   | \$13,799 | \$14,675 | \$583   |
| 33 |    |                    |               |       |           |           |      |       |       |          |          |         |
| 34 |    |                    |               |       |           |           |      |       |       |          |          |         |
| 35 |    |                    |               |       |           |           |      |       |       |          |          |         |
| 36 |    |                    |               |       |           |           |      |       |       |          |          |         |
| 37 |    |                    |               |       |           |           |      |       |       |          |          |         |
| 38 |    |                    |               |       |           |           |      |       |       |          |          |         |
| 39 |    |                    |               |       |           |           |      |       |       |          |          |         |
| 40 |    |                    |               |       |           |           |      |       |       |          |          |         |
| 41 |    |                    |               |       |           |           |      |       |       |          |          |         |
| 42 |    |                    |               |       |           |           |      |       |       |          |          |         |
| 43 |    |                    |               |       |           |           |      |       |       |          |          |         |
| 44 |    |                    |               |       |           |           |      |       |       |          |          |         |
| 45 |    |                    |               |       |           |           |      |       |       |          |          |         |
| 46 |    |                    |               |       |           |           |      |       |       |          |          |         |
| 47 |    |                    |               |       |           |           |      |       |       |          |          |         |
| 48 |    |                    |               |       |           |           |      |       |       |          |          |         |
| 49 |    |                    |               |       |           |           |      |       |       |          |          |         |
| 50 |    |                    |               |       |           |           |      |       |       |          |          |         |
| 51 |    |                    |               |       |           |           |      |       |       |          |          |         |
| 52 |    |                    |               |       |           |           |      |       |       |          |          |         |
| 53 |    |                    |               |       |           |           |      |       |       |          |          |         |
| 54 |    |                    |               |       |           |           |      |       |       |          |          |         |
| 55 |    |                    |               |       |           |           |      |       |       |          |          |         |
| 56 |    |                    |               |       |           |           |      |       |       |          |          |         |
| 57 |    |                    |               |       |           |           |      |       |       |          |          |         |
| 58 |    |                    |               |       |           |           |      |       |       |          |          |         |
| 59 |    |                    |               |       |           |           |      |       |       |          |          |         |
| 60 |    |                    |               |       |           |           |      |       |       |          |          |         |

**Tech. Suppl. - Table 10.** Estimates of rates of care seeking for malaria.

| Source                                                                                                                                                                                                                                                                                | Location                                                  | Care-seeking rate                                                                                                        |
|---------------------------------------------------------------------------------------------------------------------------------------------------------------------------------------------------------------------------------------------------------------------------------------|-----------------------------------------------------------|--------------------------------------------------------------------------------------------------------------------------|
| ScientificWorldJournal. 2003 Aug 19;3:721-30. Prevalence of childhood illnesses and care-seeking practices in rural Uganda. Mbonye AK.                                                                                                                                                | Rural Uganda                                              | 44.7%                                                                                                                    |
| Malar J. 2010 Nov 22;9:333. From fever to anti-malarial: the treatment-seeking process in rural Senegal. Smith LA, Bruce J, Gueye L, Helou A, Diallo R, Gueye B, Jones C, Webster J.                                                                                                  | Rural Senegal                                             | 61.6%                                                                                                                    |
| BMC Pub Health. 2008. Obstacles to prompt and effective malaria treatment lead to low community-coverage in two rural districts of Tanzania. Hetzel MW, Obrist B, Lengeler C, Msechu JJ, Nathan R, Dillip A, Makemba AM, Mshana C, Schulze A, Mshinda H.                              | South-eastern Tanzania (rural, high malaria transmission) | 76.3% (caretakers bringing children to HF); 56.1% (adults attending health facility for own symptoms)                    |
| Malar J. 2011 Oct 31;10:327. Monitoring fever treatment behaviour and equitable access to effective medicines in the context of initiatives to improve ACT access: baseline results and implications for programming in six African countries. Littrell M, Gatakaa H, Evance I, et al | Benin, DRC, Madagascar, Nigeria, Uganda, Zambia           | Treatment-seeking outside of home: Benin - 50.3%; DRC - 73%; Madagascar - 78%; Nigeria - 73%; Uganda - 72%; Zambia - 77% |
| Malar J. 2010 Dec 30;9:377. Factors affecting treatment-seeking for febrile illness in a malaria endemic block in Boudh district, Orissa, India: policy implications for malaria control. Das A, Ravindran TS.                                                                        | Orissa, India (high malaria transmission area)            | Treatment-seeking: 94%                                                                                                   |
| Malar J. 2010 Jun 15;9:163. Improvements in access to malaria treatment in Tanzania following community, retail sector and health facility interventions -- a user perspective. Alba S, Dillip A, Hetzel MW, et al                                                                    | Ifakara, Tanzania                                         | Health facility attendance:52%                                                                                           |

1  
2  
3 **Tech-Suppl - Figure 1.**  
4  
5  
6  
7  
8  
9  
10  
11  
12  
13  
14  
15  
16  
17  
18  
19  
20  
21  
22  
23  
24  
25  
26  
27  
28  
29  
30  
31  
32  
33  
34  
35  
36  
37  
38  
39  
40  
41  
42  
43  
44  
45  
46  
47  
48  
49  
50  
51  
52  
53  
54  
55  
56  
57  
58  
59  
60

For peer review only

1  
2  
3  
4  
5  
6  
7  
8  
9  
10  
11  
12  
13  
14  
15  
16  
17  
18  
19  
20  
21  
22  
23  
24  
25  
26  
27  
28  
29  
30  
31  
32  
33  
34  
35  
36  
37  
38  
39  
40  
41  
42  
43  
44  
45  
46  
47  
48  
49  
50  
51  
52  
53  
54  
55  
56  
57  
58  
59  
60

**Tech-Suppl - Figure 2.**

For peer review only

1  
2  
3 **Tech-Suppl - Figure 3.**  
4  
5  
6  
7  
8  
9  
10  
11  
12  
13  
14  
15  
16  
17  
18  
19  
20  
21  
22  
23  
24  
25  
26  
27  
28  
29  
30  
31  
32  
33  
34  
35  
36  
37  
38  
39  
40  
41  
42  
43  
44  
45  
46  
47  
48  
49  
50  
51  
52  
53  
54  
55  
56  
57  
58  
59  
60

For peer review only



1  
2  
3  
4  
5  
6  
7  
8  
9  
10  
11  
12  
13  
14  
15  
16  
17  
18  
19  
20  
21  
22  
23  
24  
25  
26  
27  
28  
29  
30  
31  
32  
33  
34  
35  
36  
37  
38  
39  
40  
41  
42  
43  
44  
45  
46  
47  
48  
49  
50  
51  
52  
53  
54  
55  
56  
57  
58  
59  
60

Tech. Suppl. - Figure 4.

For peer review only

1 **Tech Suppl. - Figure 5.**  
2  
3  
4  
5  
6  
7  
8  
9  
10  
11  
12  
13  
14  
15  
16  
17  
18  
19  
20  
21  
22  
23  
24  
25  
26  
27  
28  
29  
30  
31  
32  
33  
34  
35  
36  
37  
38  
39  
40  
41  
42  
43  
44  
45  
46  
47  
48  
49  
50  
51  
52  
53  
54  
55  
56  
57  
58  
59  
60

For peer review only

## Projection of costs and outcomes to 30 years

We projected cumulative costs and outcomes of the IPC campaign in Kenya for 30 years, assuming an initial campaign and a second campaign three years later (Figure 6). Costs and benefits of the two campaigns were added and reflect the lower effectiveness of the second campaign. The large rise in costs in year 4 reflects the initiation of the second campaign, and the gradual increase in cumulative costs over time reflects the costs of additional HIV treatment. The steadily rising cumulative net DALYs averted reflects the averted morbidity during the period of bed net and water filter efficacy, but is largely determined by the distribution of saved life years due to averted mortality from all three diseases during the period of IPC benefit. Distribution of benefits were made according to the following assumptions:

- HIV deaths would occur on average 15 years after infection.
- Assumes those detected are all put on ART at year of campaign.
- Earlier and more ART die to earlier detection distributed over 15 and 20 years respectively.
- HIV mortality prevention in secondary partners starts on average in year 20 after the campaign and is distributed over 20 years.
- 50% of prevented HIV mortality occurred in the index patient
- Life-expectancy at the time of the campaign was 60 years for averted mortality in malaria and diarrhea patients.
- Malaria and diarrhea morbidity reduction is confined to the campaign itself.

**Tech Suppl. - Figure 6.**

## References

1. Kahn JG, Marseille E, Auvert B. Cost-effectiveness of male circumcision for HIV prevention in a South African setting. *PLoS medicine* 2006;3(12):e517.
2. Fischer Walker CL, Perin J, Aryee MJ, Boschi-Pinto C, Black RE. Diarrhea incidence in low- and middle-income countries in 1990 and 2010: a systematic review. *BMC public health* 2012;12:220.
3. UNICEF. The State of the World's Children 2011. Table 6: Demographic Indicators: under 5 population (2010), 2011.
4. UN Department of Economic and Social Affairs - Population Division. World Population Prospects, 2010 Revision, 2010.
5. The World Bank. Population, total.
6. Kahn JG, Muraguri N, Harris B, Lugada E, Clasen T, Grabowsky M, et al. Integrated HIV testing, malaria, and diarrhea prevention campaign in Kenya: modeled health impact and cost-effectiveness. *PloS one* 2012;7(2):e31316.
7. ICF International. MEASURE DHS STATcompiler, 2012.
8. World Health Organization. CHOosing Interventions that are Cost Effective (WHO-CHOICE), 2014.

1  
2  
3  
4  
5  
6  
7  
8  
9  
10  
11  
12  
13  
14  
15  
16  
17  
18  
19  
20  
21  
22  
23  
24  
25  
26  
27  
28  
29  
30  
31  
32  
33  
34  
35  
36  
37  
38  
39  
40  
41  
42  
43  
44  
45  
46  
47  
48  
49  
50  
51  
52  
53  
54  
55  
56  
57  
58  
59  
60

For

**Scaling up integrated prevention campaigns for global health:  
Costs and cost-effectiveness in 70 countries**

Elliot Marseille<sup>1\*</sup>, MPP, DrPH; Aliya Jiwani<sup>2</sup>, MPH; Abhishek Raut<sup>3</sup>, MD; Stéphane Verguet<sup>4</sup>,  
PhD; Judd Wilson<sup>5</sup>, MD; James G. Kahn<sup>6</sup>, MD

**Author affiliations:**

<sup>1</sup> Health Strategies International, 555 59<sup>th</sup> street, Oakland, CA, 94609, USA

<sup>2</sup> Health Strategies International, 1138 North Vernon St., Arlington, VA, 22201, USA

<sup>3</sup> Department of International Health, Johns Hopkins Bloomberg School of Public Health, Baltimore, Maryland 21205

<sup>4</sup> Department of Global Health, University of Washington, Box 359909, 325 Ninth Avenue, Seattle, WA 98115, USA

<sup>5</sup> Departments of Global Health, Medicine, Pediatrics, and Epidemiology, University of Washington, Box 359909, 325 Ninth Avenue, Seattle, WA 98115, USA

<sup>6</sup> Philip R. Lee Institute for Health Policy Studies, University of California, San Francisco, 3333 California Street Suite 265, Box 0936, San Francisco, CA 94118; Global Health Sciences, University of California, San Francisco, 50 Beale Street, 12<sup>th</sup> floor, San Francisco, CA 94105

**\*Corresponding author information:**

Elliot Marseille  
[emarseille@comcast.net](mailto:emarseille@comcast.net)  
925-998-5745

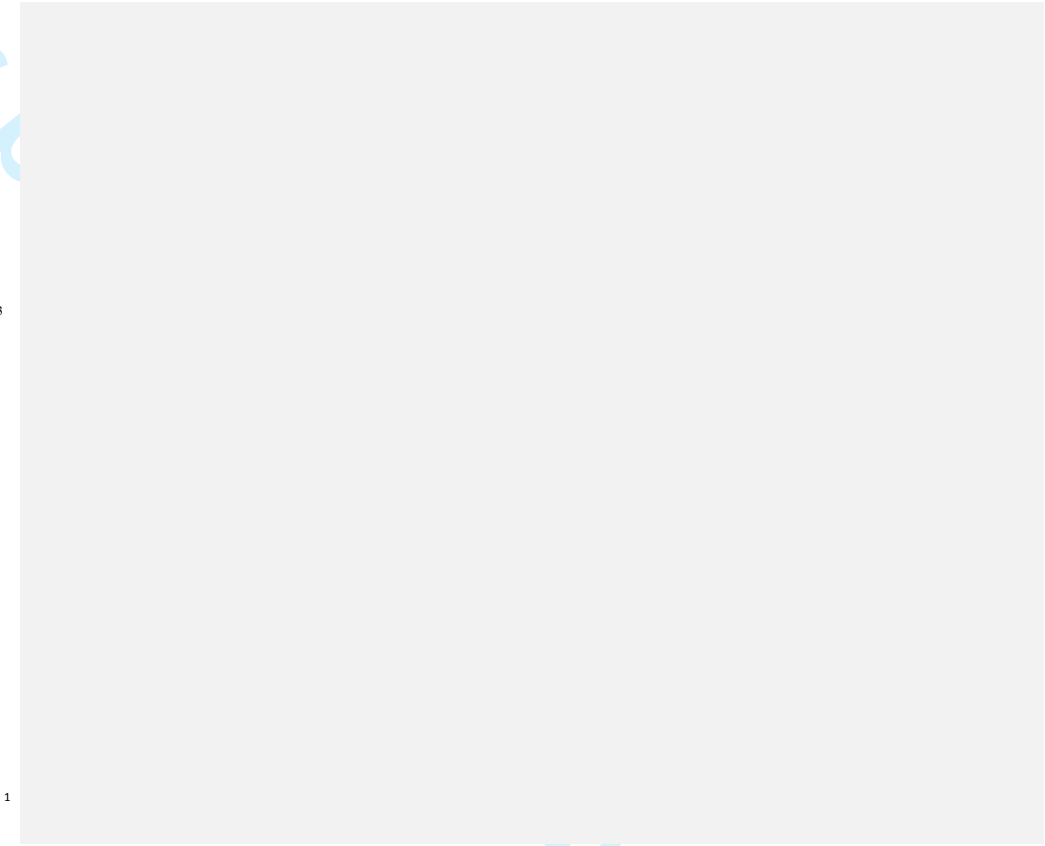

1

## Abstract

**Objectives.** This study estimated the health impact, cost, and cost-effectiveness of an integrated prevention campaign (IPC) focused on diarrhea, malaria, and HIV in 70 countries ranked by per-capita disability-adjusted life-year (DALY) burden for the three diseases.

**Methods.** We constructed a deterministic cost-effectiveness model portraying an IPC combining counseling and testing, cotrimoxazole prophylaxis, referral to treatment, and condom distribution for HIV prevention; bed nets for malaria prevention; and provision of household water filters for diarrhea prevention. We developed a mix of empirical and modeled cost and health impact estimates applied to all 70 countries. One-way, multi-way and scenario sensitivity analyses were conducted to document the strength of our findings. We used a health care payer's perspective, discounted costs and DALYs at 3% per year, and denominated cost in 2012 U.S. dollars.

**Primary and secondary outcomes:** The primary outcome was cost-effectiveness expressed as net cost per DALY averted. Other outcomes included cost of the IPC; net IPC costs adjusted for averted and additional medical costs; and DALYs averted.

**Results.** Implementation of the IPC in the 10 most cost-effective countries at 15% population coverage would cost \$583 million over three years (adjusted costs of \$398 million), averting 8.0 million DALYs. Extending IPC programs to all 70 of the identified high-burden countries at 15% coverage would cost an adjusted \$51.3 billion and avert 78.7 million DALYs. Incremental cost-effectiveness ranged from \$49 per DALY averted for the 10 countries with the most favourable cost-effectiveness to \$119, \$181, \$335, \$1,692 and \$8,340 per DALY averted as each successive group of 10 countries is added ordered by decreasing cost-effectiveness.

**Conclusion.** IPC appears cost-effective in many settings, and has the potential to substantially reduce the burden of disease in resource-poor countries. This study increases confidence that IPC can be an important new approach for enhancing global health.

2

1  
2  
3  
4  
5  
6  
7  
8  
9  
10  
11  
12  
13  
14  
15  
16  
17  
18  
19  
20  
21  
22  
23  
24  
25  
26  
27  
28  
29  
30  
31  
32  
33  
34  
35  
36  
37  
38  
39  
40  
41  
42  
43  
44  
45  
46  
47  
48  
49  
50  
51  
52  
53  
54  
55  
56  
57  
58  
59  
60

**Strengths and limitations of this study.**

*Strengths*

- Synthesizes a large volume of epidemiological data from disparate sources into a unified method for projecting the consequence of IPC implementation in 70 countries.
- Links the "opportunity index" concept with cost-effectiveness.
- Provides a more comprehensive assessment of intervention potential than assessment of cost-effectiveness alone.
- Methods presented here may be applied to other disease areas and facilitate more objective resource allocation decision-making for global health.

*Limitations*

- Incomplete availability of data relevant to the large number of countries analyzed.
- Infeasible to develop cost-effectiveness thresholds that reflected the full array of local public health options against which IPC could be considered.
- Regions or urban areas within countries may have costs and health benefits that depart from the overall country assessments.

3

## Background

For many years, vertical (disease-specific) programming has dominated the sphere of global health funding in an effort to tackle the areas of greatest need.<sup>1</sup> However, there is increasing recognition that, among diseases with complementary prevention strategies and overlapping populations, single-disease approaches to population health improvement create duplication of effort and miss important opportunities for synergies in health benefits and economies of scope.<sup>2</sup> Recent initiatives have therefore sought to integrate programs for multiple diseases, and many have demonstrated feasibility, efficiencies and success.<sup>3,4</sup>

A particularly promising example of integrated programming was a prevention campaign in Western Province, Kenya that targeted diarrhea, malaria, and HIV,<sup>5</sup> three diseases that account for a substantial portion of the total disease burden in many parts of the developing world.<sup>6</sup> Over the course of one week, the campaign provided general health education, condoms, insecticide-treated bed nets (ITNs), point-of-use water filters, and HIV testing and counseling to more than 80% of the target population.<sup>5</sup> Those testing positive for HIV were offered on-site CD4 count determination, cotrimoxazole prophylaxis, and referral to comprehensive HIV care and treatment. The campaign yielded large health benefits and net economic savings.<sup>7,8</sup> Large-scale expansion of this integrated prevention campaign (IPC) has the potential to deliver substantial health benefits and cost savings. In a separate study, we reviewed country-specific data for 70 low- and middle-income countries, finding that the opportunity for a diarrhea, malaria and HIV IPC is not limited to Kenya.<sup>9</sup> It is plausible that IPCs can have a large impact on health in many resource-limited settings.

While the cost-effectiveness of this IPC in Western Kenya has been established<sup>8</sup>, the economic and health effects of a multi-country IPC initiative are unknown. Using data appropriate for providing an initial indication of the conditions under which IPC is likely to be cost-effective, we estimated the costs, health outcomes, and cost-effectiveness of IPC implementation in the same 70 low- and middle-income countries. To support decision-making for IPC implementation, we also estimate the increases in budgets that would be required to cover increasing numbers of countries.

## Methods

### Overview

We modeled the health impact, cost, and cost-effectiveness of a diarrhea, malaria, and HIV IPC in 70 countries by adapting a previously-published spreadsheet-based model that was applied to the original IPC in Western Kenya.<sup>8</sup> Countries were chosen for inclusion in the analysis based on two factors: they were classified as low- or middle-income as defined by the World Bank<sup>10</sup>, and they had a total DALY (Disability-adjusted-life-year) burden for the three diseases addressed by the IPC in the highest tertile of the 214 World Bank-defined economies (i.e.,  $\geq 87,000$  DALYs), as described in a companion paper.<sup>9</sup> We refer to this ordering of countries by the combined disease burden as the "opportunity index". For a break-down of the relative contribution by disease to each country's total burden see Jiwani 2014 and Table 4 of the Technical Supplement). We derived incidence and case fatality rates for each country from published

4



reports, using regional averages and other approximations when country-specific estimates were missing. We developed a mix of empirical (where available) and modeled (projected from empirical data) cost estimates applied to all 70 countries. Key outcomes examined included the cost of the IPC; net IPC costs adjusting for averted and additional medical costs; deaths and disease episodes averted; DALYs averted due to prevention, and to earlier and more HIV care; and finally, cost-effectiveness expressed as net cost per DALY averted. We used a health care payer's perspective, and discounted long-term costs and DALYs at 3% per year.<sup>11</sup> Costs were denominated in 2012 U.S. dollars. The time frame of the analysis is three years for the empirical data. Modeled results depend upon the age-dependent life expectancy at the time death would otherwise occurred in Kenya. This is 61 years for diarrheal diseases and malaria, and 37 years for HIV.

#### Detailed model features

We adapted a Microsoft Excel spreadsheet that we had previously constructed to analyze the cost-effectiveness of the Kenya IPC. Details of the model have been published elsewhere.<sup>8</sup> The model estimates the health and cost benefits of prevention for malaria, diarrhoea, and HIV separately. For HIV, it also estimates the DALYs averted and costs incurred due to earlier diagnosis and treatment arising from HIV testing. Cost-effectiveness of the IPC was compared to the cost-effectiveness of ART in each of the 70 countries. This metric was selected since, with the current aspiration of universal access to ART,<sup>12</sup> provision of ART is on the active policy agenda for most HIV-affected countries.

*Cost estimates and projection methods.* Campaign costs for the Kenya IPC were obtained from published empirical data supplemented by filter repair and replacement costs.<sup>7,8</sup> We estimated campaign costs for each country using the Kenya IPC as a benchmark, translating to other countries according to type of cost, as follows. Program costs were classified as commodity, personnel and other costs. Commodities were further categorized as tradable and non-tradable. Tradable commodities are those purchased on the international market and include bed nets, filters, and condoms, and required no adjustment from the dollar-denominated costs incurred by the Kenya IPC.<sup>7</sup> The cost of non-tradable items, primarily personnel, were adjusted according to the per-capita GDP ratio, in International dollars, between Kenya and each study country.<sup>13</sup> For each country, we estimated the costs of averted medical care due to the IPC by adjusting the costs for health care incurred per fatal and non-fatal case in the Kenya campaign by the ratio of GDP per capita in the target country versus Kenya. We selected per capita GDP rather than per capita health care spending as the basis for these adjustments, because the latter reflects overall access to care and our model accounts for access separately.

It is worth noting that there is no recognized "gold standard" for adjusting program and health care costs by country. While per-capita GDP reflects overall ability to pay, it assumes that health care is a normal good in which consumption increases monotonically with income. A per-capita GDP-based index also lacks the specificity to capture both the unit cost and the relevant quantity utilized of various health inputs, such as inpatient days or outpatient visits. These utilization patterns can vary by country partially independently of income. An alternative index is per-capita spending on health care. This is a more direct measure of overall health care spending, but also fails to capture the detailed inputs cost and utilization mix. Finally, WHO-CHOICE provides country-specific costs for inpatient days and outpatient visits at various levels of facilities (e.g.

Formatted: Font color: Auto

1  
2  
3  
4  
5  
6  
7  
8  
9  
10  
11  
12  
13  
14  
15  
16  
17  
18  
19  
20  
21  
22  
23  
24  
25  
26  
27  
28  
29  
30  
31  
32  
33  
34  
35  
36  
37  
38  
39  
40  
41  
42  
43  
44  
45  
46  
47  
48  
49  
50  
51  
52  
53  
54  
55  
56  
57  
58  
59  
60

primary, secondary, and teaching hospitals). By comparing the WHO-CHOICE-derived costs for Kenya against the other 69 countries, yet a third index can be created. However, the WHO-CHOICE-based index has its own short-comings. In addition to not reflecting the specific mix of inputs needed for the present analysis, the methods used to derive the costs are somewhat opaque. In any case, the regression model used to predict country health care costs includes per-capita GDP and may thus be similar to using a per-capita GDP-based index. Table 8 of the Technical Supplement shows the base-case results using the per-capita health care spending approach, and Table 9 of the Technical Supplement uses the index derived from WHO-CHOICE. These show very little difference in the cost-effectiveness results by country rankings when compared with the per-capita GDP approach shown in Table 3.

For each country, we estimated the costs of averted medical care due to the IDC by adjusting the costs for health care incurred per fatal and non-fatal case in the Kenya campaign by the ratio of GDP per capita in the target country versus Kenya. We selected per capita GDP rather than per capita health care spending as the basis for these adjustments, because the latter reflects overall access to care and our model accounts for access separately. (For a comparison of cost adjustment methods, see Technical Supplement). For malaria, there are few country-specific data on access to care for malaria except for some of the more-affected countries, mostly in Africa. We therefore used global average rates of treatment access, estimated at 68.4% based on published literature.<sup>14,20(c)</sup> See Technical Appendix for the country-specific figures underlying this value).

As noted in Table 2, the value of 68.4% was varied from 51.3% to 85.5% in sensitivity analyses. For access to care for diarrhea, we used country-specific estimates based on demographic and health survey data on the percent of children under five years of age with diarrhea in the two weeks preceding the survey who received any kind of treatment for diarrhea.<sup>20</sup> We used an average rate of access to ART of 70%. This is considerably higher than the 56% access reported for sub-Saharan Africa<sup>21</sup> and reflects likely increases in access in the context of the global commitment to access.<sup>12</sup>

We calculated the per person-year cost of ART for each country by using published estimates for countries where available.<sup>22-25</sup> The non-drug portion of each published unit cost figure was inflated to 2012 US dollars using the U.S. CPI.<sup>23</sup> We then derived from the set of published figures an average figure for low-income, lower middle-income excluding India, and upper-middle income countries as defined by the World Bank.<sup>24</sup> We applied these country income-category averages to the larger set of countries for which published ART unit cost estimates were unavailable, according to their respective income categories. ART cost-effectiveness for each country was estimated by adjusting \$883 per DALY averted which is the average for 45 sites studied in Zambia.<sup>26</sup> To arrive at country-specific estimates we calculated the ratio of per-capita income between each country and Zambia and applied this factor to the average portion of overall ART costs for low-income countries which is non-tradable, 36.9%. This figure was derived from the ART unit cost studies described above which includes the breakdown of costs by major component.

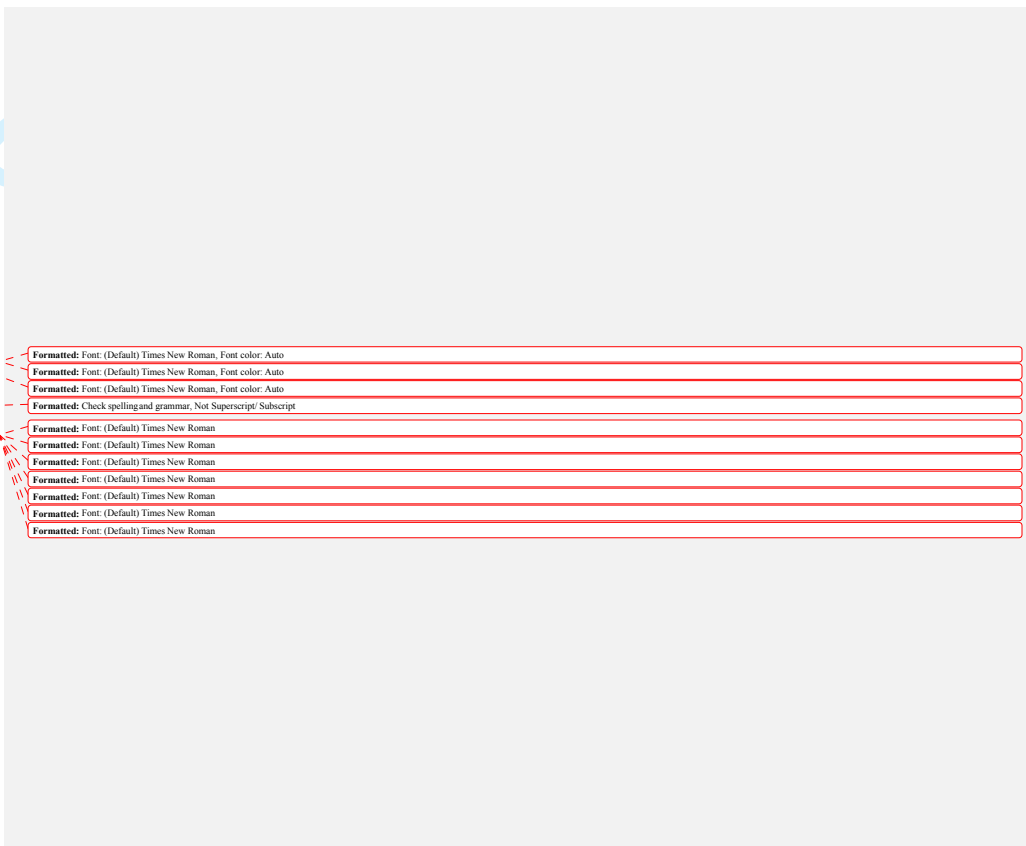

- Formatted: Font (Default) Times New Roman, Font color: Auto
- Formatted: Font (Default) Times New Roman, Font color: Auto
- Formatted: Font (Default) Times New Roman, Font color: Auto
- Formatted: Check spelling and grammar, Not Superscript/ Subscript
- Formatted: Font (Default) Times New Roman

1  
2  
3  
4  
5  
6  
7  
8  
9  
10  
11  
12  
13  
14  
15  
16  
17  
18  
19  
20  
21  
22  
23  
24  
25  
26  
27  
28  
29  
30  
31  
32  
33  
34  
35  
36  
37  
38  
39  
40  
41  
42  
43  
44  
45  
46  
47  
48  
49  
50  
51  
52  
53  
54  
55  
56  
57  
58  
59  
60

*First versus second campaign health benefits.* The health benefits of a second campaign are likely to be lower than that of the initial campaign. For malaria this is due to residual benefits from nets, beyond their average functional life of three years. In the absence of a second campaign, we assume a malaria risk in years 4-6 equal to 75% of the risk at baseline (before the first campaign). For diarrheal disease the filters themselves are not expected to confer benefit after 3 years, though there may be residual benefit from the behavioral component; we assume that the risk is 87.5% of baseline. New nets and filters in a second campaign reduce disease risks to the levels expected after the first campaign. Thus the second campaign reduces the incidence of malaria from 75% to 50% of baseline (a 1/3 relative reduction). Similarly, diarrhea decreases from 87.5% to 37% of baseline (a relative drop of 58%). (Details in technical supplement)

*Disease specific data and projection methods.* We obtained country estimates of the prevalence of HIV in the adult (15–49 years) population.<sup>42,45,46</sup> For each country, we derived estimates of the baseline cases of malaria per person-year by dividing WHO-adjusted estimates of the annual number of cases<sup>47</sup> by the total country population<sup>48</sup>. For diarrhea, we estimated the average number of cases per person-year in the overall population using DHS data on the number of cases per year in children under 5<sup>49</sup> (details in technical supplement).<sup>50,51</sup> Multiplying each estimate by the total population<sup>48</sup> yields the estimated number of cases in each country.

We calculated country-specific case fatality rates for malaria and diarrhea as the number of deaths due to the disease<sup>52,53</sup> divided by the number of cases. We set an upper-bound malaria case fatality rate of 15% based on published findings of a Delphi survey of malaria experts.<sup>54</sup> We assumed a case fatality rate for HIV of 100%.

Using a discount rate of 3%<sup>55</sup>, we estimated the DALYs incurred with each fatal case of malaria and diarrhea at 28 based on life expectancy at age 25 in Kenya (the estimated average age of death from malaria and diarrhea) of 61 years.<sup>56</sup> We derived estimates of the DALYs incurred per non-fatal case of each disease as the product of the disability weight (0.191 for malaria and 0.105 for diarrhea)<sup>57</sup> and the average duration of each case (7 days for malaria<sup>58</sup>, 4.43 days for diarrhea, a severity weighted duration for children and adults<sup>59</sup>, or 0.0037 and 0.0013 DALYs for each non-fatal case of malaria and diarrhea, respectively. Assuming 70% access to ART, we estimated 10.6 DALYs incurred per HIV infection, and 8.8 discounted DALYs averted per treated case of HIV, an assumption based on 22 years of antiretroviral therapy (ART), average age of ART initiation of 35 years, and a life expectancy at age 35 in Kenya of 37 years.<sup>56</sup> Each untreated HIV case incurs 15.1 discounted DALYs.

*Household size and beneficiaries per household.* Using country-specific data of rural household size as reported in the most recent Demographic and Health Survey, divided by the number of participants per household as observed in the Kenya IPC campaign, we obtained the number of beneficiaries per campaign participant. For bednets, we assumed fewer incremental beneficiaries per participant on the assumption that there was some prior access to bednets, 15.1% on average, as observed in the Kenya campaign. For HIV we assumed the same number of adult participants on average, 2.5, as the basis for calculating the number of beneficiaries per campaign participant.

For the remaining health inputs, we assumed values equal to those used in the Kenya analysis for all countries.<sup>8</sup> See Table 1 for base case values and sources for data inputs.

7

1  
2  
3  
4  
5  
6  
7  
8  
9  
10  
11  
12  
13  
14  
15  
16  
17  
18  
19  
20  
21  
22  
23  
24  
25  
26  
27  
28  
29  
30  
31  
32  
33  
34  
35  
36  
37  
38  
39  
40  
41  
42  
43  
44  
45  
46  
47  
48  
49  
50  
51  
52  
53  
54  
55  
56  
57  
58  
59  
60

**Table 1 about here**

*Relationship of opportunity to cost-effectiveness*

In a companion article, we identified the countries in which scale-up of a diarrhea, malaria, and HIV IPC would be most beneficial, by summarizing country-specific epidemiological data related to the disease burden and shortfall in current intervention coverage (Jiwani et al, under review, 2013). We created three "opportunity indices," ranking countries by 1) DALYs per capita across the three diseases of the IPC, 2) a sum of burden ranks for each disease, and 3) a composite of burden and intervention opportunity. Here, we extend this opportunity analysis by examining the relationship between a country's opportunity rank (in DALYs per capita) and its cost-effectiveness for IPC implementation.

*Sensitivity analyses.* To assess the effect of uncertainty in inputs, we conducted one-way and multi-way Monte Carlo sensitivity analyses for three countries: Kenya, a low-income country where the IPC trial was performed and is at the 44<sup>th</sup> percentile for cost-effectiveness of the 70 countries analyzed; Nigeria, a lower-middle income country at the 75<sup>th</sup> percentile (relatively favorable); and Bangladesh, a low-income country at the 25<sup>th</sup> percentile. Each of 31 model inputs examined in the sensitivity analyses (Table 2) was assigned a beta distribution with alpha and beta parameters of 2, in order to ensure symmetry around the mean. Maximum and minimum values were set as 1.5 and 0.5 times the base case, except for access to malaria and diarrhea treatment (0.75 to 1.25 of base case) and access to HIV treatment (0.6 to 1.4 times base case). Figures in bold font reflect parameter values that vary by country. Finally, we examined the effect of variations in important inputs on the cost-effectiveness of IPC in all 70 countries grouped in order of cost-effectiveness.

**Table 2 about here**

**Results**

Across the 70 high opportunity countries, the cost-effectiveness of the first campaign ranges from \$7 (Guinea-Bissau) to \$15,886 (China) per DALY averted (IQR \$96 - \$1,071 per DALY averted) (Table 3). At \$182 per DALY averted, Pakistan is at the 50<sup>th</sup> percentile for cost-effectiveness. With the exception of Afghanistan, the 30 countries with the most favorable cost-effectiveness are in sub-Saharan Africa. The cost-effectiveness of IPC compares favorably to the cost-effectiveness of ART in 51 countries. The 30 countries with the lowest cost-effectiveness estimates are geographically more diverse and include only three in sub-Saharan Africa (Swaziland, South Africa, and Namibia).

As shown in Figure 1, per-capita disease burden as measured by the opportunity index is highly correlated with cost-effectiveness. See Figure 1 of the Technical Supplement for relationship between opportunity index and cost-effectiveness for campaign 2.

**Table 3 and Figure 1 about here.**

8

Table 4 displays the cumulative results, grouped in 10-country increments, assuming 15% population coverage, and moving from most to least attractive cost-effectiveness. IPC in the top 10 countries would cost \$583 million for the three-year campaign, with a net cost after adjusting for effects on health care spending of \$398 million for the first three-year campaign and \$468 million for the second and subsequent campaigns. The first and second campaigns would avert 8.0 and 5.7 million DALYs respectively with an average cost-effectiveness of \$49 and \$82 per DALY averted, respectively. As shown in the right-hand two columns, the incremental cost-effectiveness rises rapidly (becomes less favorable) after coverage of the top 50 countries. In particular, if expanding from the top 50 to 60 countries and from 60 to all 70 countries, large net incremental costs are associated with relatively modest increases in health benefits. The cost per DALY averted in expanding from 60 to 70 countries is \$8,340 and \$19,728 for campaigns 1 and 2, respectively.

For each stratum of 10 countries ranked from most to least cost-effective, Table 5 displays the median cost-effectiveness for the first three-year campaigns, for possible second campaigns, and for ART. The cost-effectiveness of the first campaign compares more favorably to ART by a wide margin for each of the 10-country strata. For the second campaign ART is more cost-effective than IPC for the 51<sup>st</sup> – 60<sup>th</sup> and for the 61<sup>st</sup> – 70<sup>th</sup> country, as ranked by IPC cost-effectiveness.

**Tables 4 and 5 about here.**

Results for Kenya, Bangladesh, and Nigeria illustrate reasons for variation across countries.

In Nigeria, the IPC cost-effectiveness ratio is \$94 per DALY averted, 18<sup>th</sup> of 70 countries ranked by cost-effectiveness. This result represents high health benefits for malaria and diarrhea, and modest benefits for HIV. For every 1,000 IPC participants, the first campaign averts an estimated 13.4 deaths: 6.0 due to malaria, 3.4 due to diarrhea, and 4.0 due to HIV. The campaign costs are \$40,479, with net costs of \$34,769 after offsetting savings from averted care needs.

In Kenya, cost-effectiveness is somewhat less attractive, at \$157 per DALY averted, 31<sup>st</sup> of 70 countries. This is due to lower malaria and diarrhea benefits than in Nigeria, and more discovered HIV. For every 1,000 IPC participants, the campaign averts an estimated 10.9 deaths: 1.6 due to malaria, 2.4 to diarrhea, and 7.0 to HIV. The campaign costs \$34,280. Although reduced disease creates offsetting savings in care needs, there are \$81,000 in *added* HIV costs due to earlier and additional detection of HIV. The net cost of the campaign is \$46,149, or \$157 per DALY averted. This is less than the \$883 per DALY averted for ART in Kenya.

In Bangladesh, the IPC cost-effectiveness ratio is \$1,168 per DALY averted, 53<sup>rd</sup> of 70 countries. This is due to lower health benefits overall. For every 1,000 IPC participants, the campaign averts an estimated 0.9 deaths: 0.1 due to malaria, 0.8 due to diarrhea, and only 0.1 due to HIV. The campaign costs are \$35,658. When adjusted for modest offsetting savings from averted care, the net cost of the campaign is \$30,236. Cost-effectiveness is comparable with the estimated \$1,046 per DALY averted for ART for HIV. See Table 5 of the technical supplement for detailed results for all three countries.

1  
2  
3  
4  
5  
6  
7  
8  
9  
10  
11  
12  
13  
14  
15  
16  
17  
18  
19  
20  
21  
22  
23  
24  
25  
26  
27  
28  
29  
30  
31  
32  
33  
34  
35  
36  
37  
38  
39  
40  
41  
42  
43  
44  
45  
46  
47  
48  
49  
50  
51  
52  
53  
54  
55  
56  
57  
58  
59  
60

**Sensitivity analyses**

*One-way sensitivity analysis.* Figure 2 is a tornado graph of the sensitivity of IPC cost-effectiveness to the model inputs displayed in Table 2 for Nigeria. IPC participants per household had the greatest effect on IPC cost-effectiveness (range, \$126 per DALY averted), followed by the multiplier that reflects prevention of secondary HIV transmission, the duration of the prevention benefits of HIV interventions (range, \$122 per DALY averted each), cost of the IPC campaign (range, \$110 per DALY averted), and the reduction in mortality due to reduced HIV transmission (range, \$83 per DALY averted).

**Figure 2 about here**

For Bangladesh, the inputs with the greatest effect on cost-effectiveness are duration of benefits for diarrhea prevention and the baseline cases of diarrhea per 1,000 person-years (range, \$1,506 per DALY averted for both), campaign cost (range, \$1,377 per DALY averted), IPC participants per household (range, \$1,305 per DALY averted), and protective benefit against diarrhea mortality (range, \$1,140 per DALY averted). For Kenya, the variables with the most influence on cost-effectiveness are the multiplier that reflects prevention of secondary HIV transmission and the duration of the prevention benefits of HIV interventions (range, \$236 per DALY averted each), the reduction in mortality due to reduced HIV transmission (range, \$161 per DALY averted), cost of the IPC campaign (range, \$117 per DALY averted), and the number of participants per household (range, \$103 per DALY averted). See Technical Supplement Figures 2 and 3 for one-way sensitivity analysis tornado graphs for Bangladesh and Kenya respectively.

Figure 3 shows how variation in three inputs affects incremental cost-effectiveness as each successive 10 countries are added to a scaled-up IPC program. Up to 50 countries, IPC remains cost-effective compared with ART even if the least favorable end of the input estimate range is used.

**Figure 3 about here**

*Multivariate Monte Carlo sensitivity analysis.* Table 6 displays the 80% confidence interval for a 20,000-trial simulation for three outcomes: DALYs averted, net costs, and net cost per DALY averted (cost-effectiveness). For Kenya and Nigeria the least favorable end of the cost-effectiveness range is more favorable than the cost-effectiveness of ART for HIV, \$304 versus \$883 per DALY averted for Kenya and \$208 versus \$747 per DALY averted for Nigeria. For Bangladesh, the least favorable end of the cost-effectiveness range, \$2,547 is less favorable than the estimated \$1,046 per DALY averted for ART. For Nigeria the five most important variables in order of their correlation with cost-effectiveness (net cost per DALY averted) are, the duration of the HIV prevention benefits ( $r = -0.51$ ); prevention of secondary HIV transmission ( $r = -0.50$ ), the number of IPC participants per household ( $r = 0.33$ ), cost of the IPC campaign ( $r = 0.31$ ), and the reduction in mortality due to reduced HIV transmission ( $r = -0.24$ ), (Figure 4). See Technical Supplement Figures 4 and 5 for multivariate sensitivity analyses correlations coefficients for Kenya and Bangladesh, for projection of IPC costs and benefits in Kenya for 30 years (Technical Supplement Figure 6).

10

1  
2  
3  
4  
5  
6  
7  
8  
9  
10  
11  
12  
13  
14  
15  
16  
17  
18  
19  
20  
21  
22  
23  
24  
25  
26  
27  
28  
29  
30  
31  
32  
33  
34  
35  
36  
37  
38  
39  
40  
41  
42  
43  
44  
45  
46  
47  
48  
49  
50  
51  
52  
53  
54  
55  
56  
57  
58  
59  
60

*Scenario Analysis: IPC cost-effectiveness with HIV costs and outcomes omitted.* Finally, we report on the cost and cost-effectiveness of the IPC program if HIV program costs and health benefits are ignored. These results reflect the perspective of a payer who assumes responsibility for the diarrhea and malaria components only. When future HIV-related costs and benefits are disregarded, including both additional care costs due to more and earlier detection and reductions in care costs due to prevention, the cost per DALY averted decreases from \$157 to \$129 in Kenya; from \$94 to \$31 in Nigeria; and increases from \$1,168 to \$819 in Bangladesh.

Table 6 and Figure 4 about here.

#### Discussion

We examined the costs and health benefits of IPC for 70 countries with a high combined burden of diarrhea, malaria and HIV. Together these countries comprise 76% of the world population<sup>48</sup> and 98% of its disease burden.<sup>49</sup> If implemented with 15% population coverage in the top 40 of the 70 countries as ordered by cost-effectiveness, 47.3 million DALYs could be averted at a net cost of \$4.9 billion, or \$104 per DALY averted. As shown in Table 3, this compares favorably with the cost-effectiveness of ART in each of those 40 countries. The DALYs averted constitute 58% of the disease burden due to HIV, malaria and diarrheal disease in these countries. \$4.9 billion is considerably less than the President's request to the United States Congress for FY 2013 for \$6.4 billion for the PEPFAR program<sup>60</sup> and thus might be affordable from a donor's perspective, especially if the current trend of greater host country financial contribution to HIV programs continues. With the exception of Afghanistan, all 30 of the countries in which IPC was most cost-effective are in sub-Saharan Africa and in 51 countries, the cost-effectiveness of IPC compared favorably to ART.

The cost-effectiveness of IPCs varies greatly among the 70 countries we examined. This wide divergence is due primarily to differences in disease burden and therefore to the higher levels of incremental health benefit generated per incremental dollar spent for prevention. For example, Nigeria ranks 4<sup>th</sup> of the 70 countries based on DALYs per capita in the three diseases of the IPC, and Bangladesh ranks 55<sup>th</sup>. As shown in Figure 1, per-capita disease burden as measured by the opportunity index is highly correlated with cost-effectiveness. In the case of a single disease-intervention pair such a finding would be unsurprising since the cost-effectiveness of most prevention interventions depend importantly on incidence. It is more noteworthy here since the relative prevalence of the three diseases varies greatly between the countries we studied, and the effect on medical care costs of intervening also varies substantially among the three diseases. In spite of this variability, the opportunity index is a reasonably good guide to cost-effectiveness.

Costs of program delivery also matter. Swaziland, Botswana and South Africa have relatively unfavorable cost-effectiveness in relation to their disease burden. This is due primarily to their high per-capita GDP and thus the higher estimated non-commodity (mainly personnel) portion of their campaign costs. However, IPC cost-effectiveness still compares favorably to that of ART in all three countries.

1  
2  
3  
4  
5  
6  
7  
8  
9  
10  
11  
12  
13  
14  
15  
16  
17  
18  
19  
20 Sensitivity of findings within each country reflects how the IPC interacts with local disease  
21 burden. Diarrhea is the largest contributor to the disease burden in Bangladesh, accounting for  
22 87% of the DALYs averted by the IPC campaign. Not surprisingly, the most important  
23 determinant of cost-effectiveness was the estimated duration of the benefits of the water filter  
24 and the baseline incidence of diarrhea. Kenya has a far larger HIV epidemic, with a prevalence  
25 of 6.3% rather than 0.06% of adults as in Bangladesh. Accordingly, the largest determinants of  
26 IPC cost-effectiveness in Kenya were HIV-related in both one-way and multivariate sensitivity  
27 analyses. Nigeria's HIV prevalence of 3.6% is close to the average of 3.5% of the 70 countries  
28 examined. Nigeria's high IPC cost-effectiveness ranking is due to its high incidence of malaria  
29 and diarrhea, 252 and 765 cases per 1,000 person-years respectively, compared with median  
30 values of 52 and 521 for malaria and diarrhea respectively for the 70 countries studied.

31  
32 Among the strengths of the current study are its synthesis of a large volume of epidemiological  
33 data from disparate sources into a unified method for projecting the consequence of IPC  
34 implementation in 70 countries, and the linking of the "opportunity index" concept with cost-  
35 effectiveness. This provides a more comprehensive assessment of intervention potential than  
36 assessment of cost-effectiveness alone. This data-driven process may be applied to other disease  
37 areas and facilitate more objective resource allocation decision-making.

38  
39 Limitations of our approach include incomplete availability of data relevant to the large number  
40 of countries analyzed. Methods for approximation were therefore necessary. For example, the  
41 costs of the campaigns themselves were extrapolated from empirical Kenya-specific data using  
42 per-capita GDP ratios between Kenya and the other countries to estimate the non-tradable  
43 commodity portion of costs. For other variables such as the protective effects of HIV prevention,  
44 bed nets and water filters where country-specific information was absent we employed wide  
45 ranges in the sensitivity analyses to ensure that we accounted for uncertainty, and this produced  
46 wide confidence intervals around the model outcomes.

47  
48 This study provides substantial evidence that IPC campaigns can be cost-effective in a large  
49 number of low and middle-income countries epidemic settings. However, it leaves unanswered  
50 important questions that need to be addressed when these broad findings are translated into  
51 programs and policies. For example, in settings with high prevalence of both HIV and malaria, as  
52 community HIV prevalence is reduced, malaria susceptibility may decline, thus reducing the  
53 benefits associated with malaria prevention. Such interactions are not accounted for in our  
54 analysis. In some countries the relative contributions of each disease to the total burden imposed  
55 by all three diseases is uneven. (See Table 4 of the Technical Supplement for a breakdown of the  
56 contribution of each disease to the total for all three diseases). Swaziland, for example, has a  
57 high burden of HIV and a low burden of malaria. In Swaziland and similar settings, it may be  
58 sensible to focus the IPC campaign in areas of relatively high malaria endemicity, by other  
59 means to target the malaria prevention component. Our cost projections posit relatively low IPC  
60 coverage, 15%. At this level it is reasonable to assume that in most countries, many high-  
prevalence areas would not be fully covered and planners need not be concerned that a point of  
diminishing returns would be met in which it becomes more costly to cover the next community,  
while the benefit of covering that community might decline. However, prior to implementation,  
country-specific analyses would be required to determine for which subset of countries it would  
be more cost-effective to scale up to higher coverage levels even if it means that some countries



1  
2  
3  
4  
5  
6  
7  
8  
9  
10  
11  
12  
13  
14  
15  
16  
17  
18  
19  
20  
21  
22  
23  
24  
25  
26  
27  
28  
29  
30  
31  
32  
33  
34  
35  
36  
37  
38  
39  
40  
41  
42  
43  
44  
45  
46  
47  
48  
49  
50  
51  
52  
53  
54  
55  
56  
57  
58  
59  
60

are excluded from implementation altogether. The current study also was not designed to consider how program costs and effectiveness might vary according to whether a more vertical or more integrated approach is adopted, or depending on the level of prior scale of existing diarrheal disease, malaria or HIV programs. These important program design considerations will depend on the organization of the health care system in each of the countries considering an IPC program.

Because we looked at a large number of countries, we could not explore specific countries in detail. It was infeasible to develop cost-effectiveness thresholds that reflected the full array of local public health options against which IPC could be considered. Comparing IPC with the estimated cost-effectiveness of ART for HIV does not account for the potential intervention options that are more efficient than both IPC and ART. In addition, there may be substantial regions or urban areas within countries that have costs, health benefits that depart from the overall country assessments to which our analysis is confined. Finally, we were not able to evaluate the cost to patients of seeking care and were thus unable to adopt a full societal perspective. Since disease prevention averts the need for these expenditures, our results may under-estimate net costs and thus cost-effectiveness. The current analysis should not displace investigation of potential opportunities for efficient IPC implementation in high disease burden areas within countries.

This study increases confidence that IPC can be an important new approach for enhancing global health. IPC appears to be cost-effective compared to ART for HIV in many settings, and has the potential to substantially reduce the burden of disease in poor countries. If implemented with 15% population coverage in the top 40 of the 70 countries as ordered by cost-effectiveness, 47.3 million DALYs could be averted at a net cost of \$4.9 billion, or \$104 per DALY averted. The specific countries, or number of countries, a donor may want to fund will depend on resource availability, and this analysis provides substantial guidance to decision makers aiming to predict the costs and benefits of various levels of investments in IPC programs. If taken to scale, IPC can be a highly efficient strategy for improving global health.

13

1  
2  
3  
4  
5  
6  
7  
8  
9  
10  
11  
12  
13  
14  
15  
16  
17  
18  
19  
20  
21  
22  
23  
24  
25  
26  
27  
28  
29  
30  
31  
32  
33  
34  
35  
36  
37  
38  
39  
40  
41  
42  
43  
44  
45  
46  
47  
48  
49  
50  
51  
52  
53  
54  
55  
56  
57  
58  
59  
60

**Author contributions**

EM conceived and designed the study, conducted the analyses, and drafted and revised the paper.

AJ provided data for the study, helped with the analyses and drafting and revision. AR provided data for the study and revised the draft paper. SV and JW critiqued the analysis helped with specifying data inputs, and revised the draft paper. JGK helped guide design and implementation of the study, helped with specifying data inputs and edited the paper.

**Conflicts of interest**

None declared.

14

## References

1. De Maeseneer J, van Weel C, Egilman D, Mfenyana K, Kaufman A, Sewankambo N. Strengthening primary care: addressing the disparity between vertical and horizontal investment. *The British journal of general practice : the journal of the Royal College of General Practitioners* 2008;58(546):3-4.
2. Brady MA, Hooper PJ, Ottesen EA. Projected benefits from integrating NTD programs in sub-Saharan Africa. *Trends Parasitol* 2006;22(7):285-91.
3. Linehan M, Hanson C, Weaver A, Baker M, Kabore A, Zoerhoff KL, et al. Integrated implementation of programs targeting neglected tropical diseases through preventive chemotherapy: proving the feasibility at national scale. *The American journal of tropical medicine and hygiene* 2011;84(1):5-14.
4. Desormeaux J, Johnson MP, Coberly JS, Losikoff P, Johnson E, Huebner R, et al. Widespread HIV counseling and testing linked to a community-based tuberculosis control program in a high-risk population. *Bulletin of the Pan American Health Organization* 1996;30(1):1-8.
5. Lugada E, Millar D, Haskew J, Grabowsky M, Garg N, Vestergaard M, et al. Rapid implementation of an integrated large-scale HIV counseling and testing, malaria, and diarrhea prevention campaign in rural Kenya. *PLoS one* 2010;5(8):e12435.
6. Murray CJ, Vos T, Lozano R, Naghavi M, Flaxman AD, Michaud C, et al. Disability-adjusted life years (DALYs) for 291 diseases and injuries in 21 regions, 1990-2010: a systematic analysis for the Global Burden of Disease Study 2010. *Lancet* 2012;380(9859):2197-223.
7. Kahn JG, Harris B, Mermin JH, Clasen T, Lugada E, Grabowksy M, et al. Cost of community integrated prevention campaign for malaria, HIV, and diarrhea in rural Kenya. *BMC health services research* 2011;11:346.
8. Kahn JG, Muraguri N, Harris B, Lugada E, Clasen T, Grabowsky M, et al. Integrated HIV testing, malaria, and diarrhea prevention campaign in Kenya: modeled health impact and cost-effectiveness. *PLoS one* 2012;7(2):e31316.
9. Jiwani A, Matheson A, Kahn JG, Raut A, Verguet S, Marseille E, et al. Integrated disease prevention campaigns: assessing country opportunity for implementation via an index approach. *BMJ open* 2014;4(3):e004308.
10. The World Bank. How we Classify Countries. [cited 2012 September 4]; Available from: <http://data.worldbank.org/about/country-classifications>, 2012.
11. World Bank. *World Development Report 1993: Investing in Health*. New York, N.Y.: Oxford University Press, 1993.
12. United Nations. Resolution adopted by the General Assembly: 65/1. Keeping the promise: united to achieve the Millenium Development Goals, 2010.
13. Central Intelligence Agency. Country comparison: GDP per capita (PPP), 2012.
14. Mbonye AK. Prevalence of childhood illnesses and care-seeking practices in rural Uganda. *TheScientificWorldJournal* 2003;3:721-30.
15. Hetzel MW, Obrist B, Lengeler C, Msechu JJ, Nathan R, Dillip A, et al. Obstacles to prompt and effective malaria treatment lead to low community-coverage in two rural districts of Tanzania. *BMC public health* 2008;8:317.

16. Alba S, Dillip A, Hetzel MW, Mayumana I, Mshana C, Makemba A, et al. Improvements in access to malaria treatment in Tanzania following community, retail sector and health facility interventions -- a user perspective. *Malaria journal* 2010;9:163.
17. Das A, Ravindran TS. Factors affecting treatment-seeking for febrile illness in a malaria endemic block in Boudh district, Orissa, India: policy implications for malaria control. *Malaria journal* 2010;9:377.
18. Smith LA, Bruce J, Gueye L, Helou A, Diallo R, Gueye B, et al. From fever to anti-malarial: the treatment-seeking process in rural Senegal. *Malaria journal* 2010;9:333.
19. Littrell M, Gatakaa H, Evance I, Poyer S, Njogu J, Solomon T, et al. Monitoring fever treatment behaviour and equitable access to effective medicines in the context of initiatives to improve ACT access: baseline results and implications for programming in six African countries. *Malaria journal* 2011;10:327.
20. ICF International. STATcompiler - % of children under 5 with diarrhea in 2 wks preceding survey who received any kind of treatment: Measure DHS, 2012.
21. UNAIDS. Sub-Saharan Africa. Regional fact sheet. 2012.
22. Galarraga O, Wirtz VJ, Figueroa-Lara A, Santa-Ana-Tellez Y, Coulibaly I, Viisainen K, et al. Unit costs for delivery of antiretroviral treatment and prevention of mother-to-child transmission of HIV: a systematic review for low- and middle-income countries. *Pharmacoeconomics* 2011;29(7):579-99.
23. Kitajima T, Kobayashi Y, Chaipah W, Sato H, Chadbunchachai W, Thuennadee R. Costs of medical services for patients with HIV/AIDS in Khon Kaen, Thailand. *Aids* 2003;17(16):2375-81.
24. Menzies NA, Berruti AA, Berzon R, Filler S, Ferris R, Ellerbrock TV, et al. The cost of providing comprehensive HIV treatment in PEPFAR-supported programs. *Aids* 2011;25(14):1753-60.
25. Marseille E, Kahn JG, Pitter C, Bunnell R, Epalatai W, Jawe E, et al. The cost effectiveness of home-based provision of antiretroviral therapy in rural Uganda. *Applied health economics and health policy* 2009;7(4):229-43.
26. Marseille E, Giganti M, Mwangi A. Taking ART to Scale: Determinants of the Cost and Cost-Effectiveness of Antiretroviral Therapy in 45 Clinical Sites in Zambia. *PLoS ONE - In Press* 2012.
27. Hounton SH, Akonde A, Zannou DM, Bashi J, Meda N, Newlands D. Costing universal access of highly active antiretroviral therapy in Benin. *AIDS Care* 2008;20(5):582-7.
28. Bikilla AD, Jerene D, Robberstad B, Lindtjorn B. Cost estimates of HIV care and treatment with and without anti-retroviral therapy at Arba Minch Hospital in southern Ethiopia. *Cost effectiveness and resource allocation : C/E* 2009;7:6.
29. Koenig SP, Riviere C, Leger P, Severe P, Atwood S, Fitzgerald DW, et al. The cost of antiretroviral therapy in Haiti. *Cost effectiveness and resource allocation : C/E* 2008;6:3.
30. Jaffar S, Amuron B, Foster S, Birungi J, Levin J, Namara G, et al. Rates of virological failure in patients treated in a home-based versus a facility-based HIV-care model in Jinja, southeast Uganda: a cluster-randomised equivalence trial. *Lancet* 2009;374(9707):2080-9.
31. Gupta I, M, Trivedi, S. Kandamathan. Recurrent costs of India's free ART program, in HIV and AIDS in South Asia: an economic development risk., M. Haacker and M. Caeson, Editors. Washington, DC: World Bank, 2009: p. xxvi, 244.

- 1  
2  
3  
4  
5  
6  
7  
8  
9  
10  
11  
12  
13  
14  
15  
16  
17  
18  
19  
20  
21  
22  
23  
24  
25  
26  
27  
28  
29  
30  
31  
32  
33  
34  
35  
36  
37  
38  
39  
40  
41  
42  
43  
44  
45  
46  
47  
48  
49  
50  
51  
52  
53  
54  
55  
56  
57  
58  
59  
60
32. John KR, Rajagopalan N, Madhuri KV. Brief communication: economic comparison of opportunistic infection management with antiretroviral treatment in people living with HIV/AIDS presenting at an NGO clinic in Bangalore, India. *MedGenMed : Medscape general medicine* 2006;8(4):24.
33. Kombe G, Smith O, Nwagbara C. Scaling Up Antiretroviral Treatment in the Public Sector in Nigeria: A Comprehensive Analysis of Resource Requirements: Report issued by PHRplus and Abt Associates, 2004.
34. Aracena-Genao B, Navarro JO, Lamadrid-Figueroa H, Forsythe S, Trejo-Valdivia B. Costs and benefits of HAART for patients with HIV in a public hospital in Mexico. *Aids* 2008;22 Suppl 1:S141-8.
35. Bautista-Arredondo S, Dmytraczzenko T, Kombe G, Bertozzi SM. Costing of scaling up HIV/AIDS treatment in Mexico. *Salud publica de Mexico* 2008;50 Suppl 4:S437-44.
36. Cleary SM, McIntyre D, Bouille AM. The cost-effectiveness of antiretroviral treatment in Khayelitsha, South Africa—a primary data analysis. *Cost effectiveness and resource allocation : C/E* 2006;4:20.
37. Martinson N, Mohapi L, Bakos D, Gray GE, McIntyre JA, Holmes CB. Costs of providing care for HIV-infected adults in an urban HIV clinic in Soweto, South Africa. *Journal of acquired immune deficiency syndromes* 2009;50(3):327-30.
38. Rosen S, Long L, Sanne I. The outcomes and outpatient costs of different models of antiretroviral treatment delivery in South Africa. *Tropical medicine & international health : TM & IH* 2008;13(8):1005-15.
39. Deghaye N, Pawinski RA, Desmond C. Financial and economic costs of scaling up the provision of HAART to HIV-infected health care workers in KwaZulu-Natal. *S Afr Med J* 2006;96(2):140-3.
40. Harling G, Wood R. The evolving cost of HIV in South Africa: changes in health care cost with duration on antiretroviral therapy for public sector patients. *Journal of acquired immune deficiency syndromes* 2007;45(3):348-54.
41. Kevany S, Meintjes G, Rebe K, Maartens G, Cleary S. Clinical and financial burdens of secondary level care in a public sector antiretroviral roll-out setting (G. F. Jooste Hospital). *S Afr Med J* 2009;99(5):320-5.
42. Gampinder. Data in Gampinder World. *Estimated HIV prevalence % (ages 15-49)*.
43. US Dept. of Labor Bureau of Labor Statistics. Consumer Price Index - All Urban Consumers (CPI-U). Washington, DC, 2013.
44. The World Bank. How we Classify Countries, 2012.
45. Ethiopia Federal HIV/AIDS Prevention and Control Office. Country Progress Report on HIV/AIDS Response: Federal Democratic Republic of Ethiopia, 2012.
46. Republique Democratique Du Congo - Programme National Multisectoriel de Lutte Contre le Sida (PNMLS). Rapport d'Activite Sure la Riposte au VIH/SIDA en R.D.Congo 2012.
47. Cibulskis RE, Aregawi M, Williams R, Otten M, Dye C. Worldwide incidence of malaria in 2009: estimates, time trends, and a critique of methods. *PLoS medicine* 2011;8(12):e1001142.
48. The World Bank. Population, total: The World Bank, 2010.
49. Fischer Walker CL, Perin J, Aryee MJ, Boschi-Pinto C, Black RE. Diarrhea incidence in low- and middle-income countries in 1990 and 2010: a systematic review. *BMC public health* 2012;12:220.

50. UN Department of Economic and Social Affairs - Population Division. World Population Prospects. 2010 Revision, 2010.
51. UNICEF. The State of the World's Children 2011. Table 6: Demographic Indicators: under 5 population (2010), 2011.
52. Institute for Health Metrics and Evaluation. Malaria Mortality Estimates by Country 1980-2010, 2009.
53. World Health Organization. Global Health Observatory Data Repository. *Global Burden of Disease*. Geneva, 2011.
54. Lubell Y, Staedke SG, Greenwood BM, Kanya MR, Molyneux M, Newton PN, et al. Likely health outcomes for untreated acute febrile illness in the tropics in decision and economic models; a Delphi survey. *PLoS one* 2011;6(2):e17439.
55. The World Bank. World Development Report 1993: Investing in Health 1993.
56. World Health Statistics 2012. Life tables for WHO Member States. Geneva: World Health Organization, 2009.
57. Mathers CD, Lopez AD, Murray CJL. The Burden of Disease and Mortality by Condition: Data, Methods, and Results for 2001. In: Lopez AD, Mathers CD, Ezzati M, Jamison DT, Murray CJL, editors. *Global Burden of Disease and Risk Factors*. Washington (DC), 2006.
58. Snow R, Newton C, Craig M, Steketee R. The Public Health Burden of Plasmodium falciparum Malaria in Africa: Deriving the Numbers. *Disease Control Priorities Project Working Paper No. 11*. Bethesda, Maryland: Fogarty International Center, National Institutes of Health, 2003.
59. Lamberti LM, Fischer Walker CL, Black RE. Systematic review of diarrhea duration and severity in children and adults in low- and middle-income countries. *BMC public health* 2012;12:276.
60. Kaiser Family Foundation. The U.S. President's Emergency Plan for AIDS Relief (PEPFAR), 2013.
61. World Health Organization. Global Burden of Disease. Table 1: Estimated total deaths ('000), by cause, sex and WHO Member State, 2008, 2011.
62. Walensky RP, Wolf LL, Wood R, Fofana MO, Freedberg KA, Martinson NA, et al. When to start antiretroviral therapy in resource-limited settings. *Annals of internal medicine* 2009;151(3):157-66.
63. Mermin J, Lule J, Ekwaru JP, Malamba S, Downing R, Ransom R, et al. Effect of cotrimoxazole prophylaxis on morbidity, mortality, CD4-cell count, and viral load in HIV infection in rural Uganda. *Lancet* 2004;364(9443):1428-34.
64. Ayieko P, Akumu AO, Griffiths UK, English M. The economic burden of inpatient paediatric care in Kenya: household and provider costs for treatment of pneumonia, malaria and meningitis. *Cost effectiveness and resource allocation : C/E* 2009;7:3.
65. Lengeler C. Insecticide-treated bed nets and curtains for preventing malaria. *The Cochrane database of systematic reviews* 2004(2):CD000363.
66. Clasen T, Haller L, Walker D, Bartram J, Cairncross S. Cost-effectiveness of water quality interventions for preventing diarrhoeal disease in developing countries. *J Water Health* 2007;5(4):599-608.
67. Denison JA, O'Reilly KR, Schmid GP, Kennedy CE, Sweat MD. HIV voluntary counseling and testing and behavioral risk reduction in developing countries: a meta-analysis, 1990-2005. *AIDS and behavior* 2008;12(3):363-73.

- 1  
2  
3  
4  
5  
6  
7  
8  
9  
10  
11  
12  
13  
14  
15  
16  
17  
18  
19  
20 68. Weller S, Davis K. Condom effectiveness in reducing heterosexual HIV transmission. *The Cochrane database of systematic reviews* 2002(1):CD003255.
- 21 69. Smith DL, Cohen JM, Moonen B, Tatem AJ, Sabot OJ, Ali A, et al. Infectious disease. Solving the Sisyphian problem of malaria in Zanzibar. *Science* 2011;332(6036):1384-5.
- 22 70. Kahn JG, Marseille E, Auvert B. Cost-effectiveness of male circumcision for HIV prevention in a South African setting. *PLoS medicine* 2006;3(12):e517.
- 23 71. Mulligan JA, Yukich J, Hanson K. Costs and effects of the Tanzanian national voucher scheme for insecticide-treated nets. *Malaria journal* 2008;7:32.
- 24 72. Kilian A, Byamukama W, Pigeon O, Atieli F, Duchon S, Phan C. Long-term field performance of a polyester-based long-lasting insecticidal mosquito net in rural Uganda. *Malaria journal* 2008;7:49.
- 25 73. Clasen T, Naranjo J, Frauchiger D, Gerba C. Laboratory assessment of a gravity-fed ultrafiltration water treatment device designed for household use in low-income settings. *The American journal of tropical medicine and hygiene* 2009;80(5):819-23.
- 26 74. Lubell Y, Riewpaiboon A, Dondorp AM, von Seidlein L, Mokuolu OA, Nansumba M, et al. Cost-effectiveness of parenteral artesunate for treating children with severe malaria in sub-Saharan Africa. *Bull World Health Organ* 2011;89(7):504-12.
- 27 75. Tate JE, Rheingans RD, O'Reilly CE, Obonyo B, Burton DC, Tornheim JA, et al. Rotavirus disease burden and impact and cost-effectiveness of a rotavirus vaccination program in Kenya. *J Infect Dis* 2009;200 Suppl 1:S76-84.
- 28 76. Shillcutt S, Morel C, Goodman C, Coleman P, Bell D, Whitty CJ, et al. Cost-effectiveness of malaria diagnostic methods in sub-Saharan Africa in an era of combination therapy. *Bull World Health Organ* 2008;86(2):101-10.
- 29  
30  
31  
32  
33  
34  
35  
36  
37  
38  
39  
40  
41  
42  
43  
44  
45  
46  
47  
48  
49  
50  
51  
52  
53  
54  
55  
56  
57  
58  
59  
60

1  
2  
3  
4  
5  
6  
7  
8  
9  
10  
11  
12  
13  
14  
15  
16  
17  
18  
19  
20  
21  
22  
23  
24  
25  
26  
27  
28  
29  
30  
31  
32  
33  
34  
35  
36  
37  
38  
39  
40  
41  
42  
43  
44  
45  
46  
47  
48  
49  
50  
51  
52  
53  
54  
55  
56  
57  
58  
59  
60

**Figure Legends**

**Figure 1.** Cost-effectiveness (Net IPC cost per DALY averted) and Opportunity Index (DALYs per capita) (Campaign 1, n=70)

**Figure 2.** Tornado Graph of Cost per DALY averted –Nigeria: Impact by Input

**Figure 3.** One-way sensitivity analysis of incremental cost-effectiveness by three key variables in 10-country increments ranked by IPC cost-effectiveness.

**Figure 4.** Result of 20,000-trial Monte Carlo simulation: Correlation between input values and cost per DALY averted – Nigeria.

**Tech. Suppl. - Figure 1.** Cost-effectiveness (Net IPC cost per DALY averted) and Opportunity Index (Campaign 2, n=70)

**Tech. Suppl. - Figure 2.** Tornado Graph of Cost per DALY averted – Bangladesh: Impact by Input

**Tech. Suppl. - Figure 3.** Tornado graph of cost per DALY averted – Kenya

**Tech. Suppl. - Figure 4.** Result of 20,000-trial Monte Carlo simulation: Correlation between input values and cost per DALY averted – Bangladesh.

**Tech Suppl. - Figure 5.** Result of 20,000-trial Monte Carlo simulation: Correlation between input values and cost per DALY averted – Kenya.

**Tech Suppl. - Figure 6.** Discounted cumulative net costs, and DALYs averted for two IPC campaigns in Kenya, projected to 30 years, per 1,000 participants.

20



1  
2  
3  
4  
5  
6  
7  
8  
9  
10  
11  
12  
13  
14  
15  
16  
17  
18  
19  
20  
21  
22  
23  
24  
25  
26  
27  
28  
29  
30  
31  
32  
33  
34  
35  
36  
37  
38  
39  
40  
41  
42  
43  
44  
45  
46  
47  
48  
49  
50  
51  
52  
53  
54  
55  
56  
57  
58  
59  
60

For

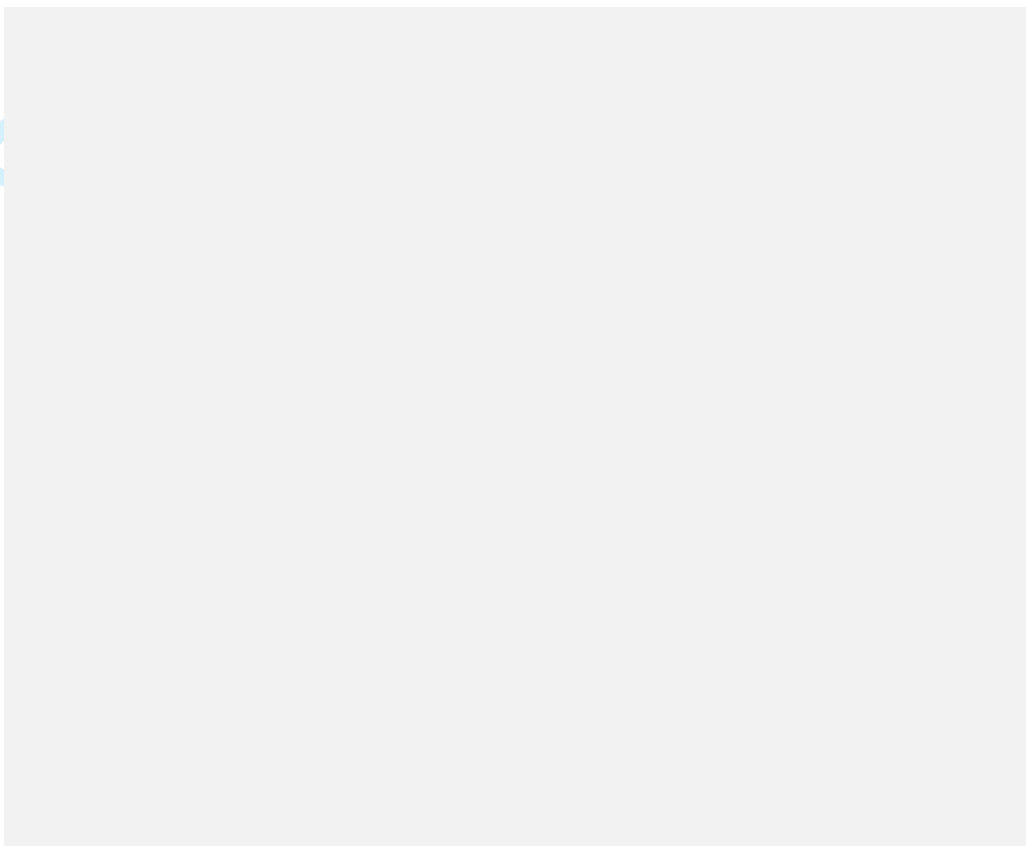

21

1  
2  
3  
4  
5  
6  
7  
8  
9  
10  
11  
12  
13  
14  
15  
16  
17  
18  
19  
20  
21  
22  
23  
24  
25  
26  
27  
28  
29  
30  
31  
32  
33  
34  
35  
36  
37  
38  
39  
40  
41  
42  
43  
44  
45  
46  
47  
48  
49  
50  
51  
52  
53  
54  
55  
56  
57  
58  
59  
60

FOR

Table 1. Base case values and sources for data inputs. Bold figures represent values that change with each country.

|                                                   | Malari   | Diarrhe | HIV      |          | Source(s)                                                  |                                                        |                                                                          |
|---------------------------------------------------|----------|---------|----------|----------|------------------------------------------------------------|--------------------------------------------------------|--------------------------------------------------------------------------|
|                                                   | LLIN     | Filters | VCT      | Condoms  | LLIN                                                       | Filters                                                | VCT / condoms                                                            |
| Health in <sup>1</sup> puts                       |          |         |          |          |                                                            |                                                        |                                                                          |
| Campaign                                          |          | 2.5     |          |          |                                                            |                                                        | Post-campaign survey                                                     |
| Participant per household                         |          |         |          |          |                                                            |                                                        |                                                                          |
| Number benefiting per campaign participant        | 1.563    | 1.840   | 0.950    | 0.361    |                                                            |                                                        | Post-campaign survey                                                     |
| Baseline cases per year per individual benefiting | 0.057    | 0.542   | 0.004    | 0.009    | [47, 48]                                                   | [49-51]                                                | [8,62-64] Post-campaign survey (see text)                                |
| Proportion of cases that are fatal                | 0.012    | 0.001   | 1        | 1        | [47, 52, 54]                                               | [48, 49, 51, 59, 62]                                   | Assumption                                                               |
| QALYs incurred with each fatal case               | 28.0     | 28.0    | 15.1     | 15.1     | [56]                                                       | [56]                                                   | [56]                                                                     |
| QALYs incurred with each non-fatal case           | 0.0037   | 0.0012  | n/a      | n/a      | [57, 58]                                                   | [57, 59]                                               | N/a                                                                      |
| Protective effect against mortality               | 0.50     | 0.63    | 0.50     | 0.26     | [65], expert opinion                                       | [66]                                                   | [67, 68]                                                                 |
| Protective effect against non-fatal cases         | 0.5      | 0.63    | n/a      | n/a      | [65]                                                       | [66]                                                   | N/a                                                                      |
| Multiplier to capture secondary benefits          | n/a bit  | n/a     | 2        | 2        | [69]                                                       | N/a                                                    | [70] (see text)                                                          |
| Years of benefit                                  | 3        | 3       | 1        | 1        | [71, 72] Adjusted to 3 years per post-campaign evaluation. | [73] Adjusted to 3 years per post-campaign evaluation. | [68]                                                                     |
| Access to care                                    | 0.684    | 0.678   | 0.700    | 0.700    | [14-19]                                                    | [20]                                                   | Assumption                                                               |
| Cost inputs                                       |          |         |          |          |                                                            |                                                        |                                                                          |
| Campaign cost                                     | \$34,280 |         |          |          |                                                            |                                                        | [7] \$31,980 plus additional \$2,300 in revised filter maintenance costs |
| Discount rate                                     | 3.0%     |         |          |          |                                                            |                                                        | [10]                                                                     |
| Health care incurred with                         | \$65     | \$104   | \$12,213 | \$12,213 | [64, 74]                                                   | [75]                                                   | Authors' construction based on 22 years on ART at \$766 per              |

1  
2  
3  
4  
5  
6  
7  
8  
9  
10  
11  
12  
13  
14  
15  
16  
17  
18  
19  
20  
21  
22  
23  
24  
25  
26  
27  
28  
29  
30  
31  
32  
33  
34  
35  
36  
37  
38  
39  
40  
41  
42  
43  
44  
45  
46  
47  
48  
49  
50  
51  
52  
53  
54  
55  
56  
57  
58  
59  
60

For peer review only

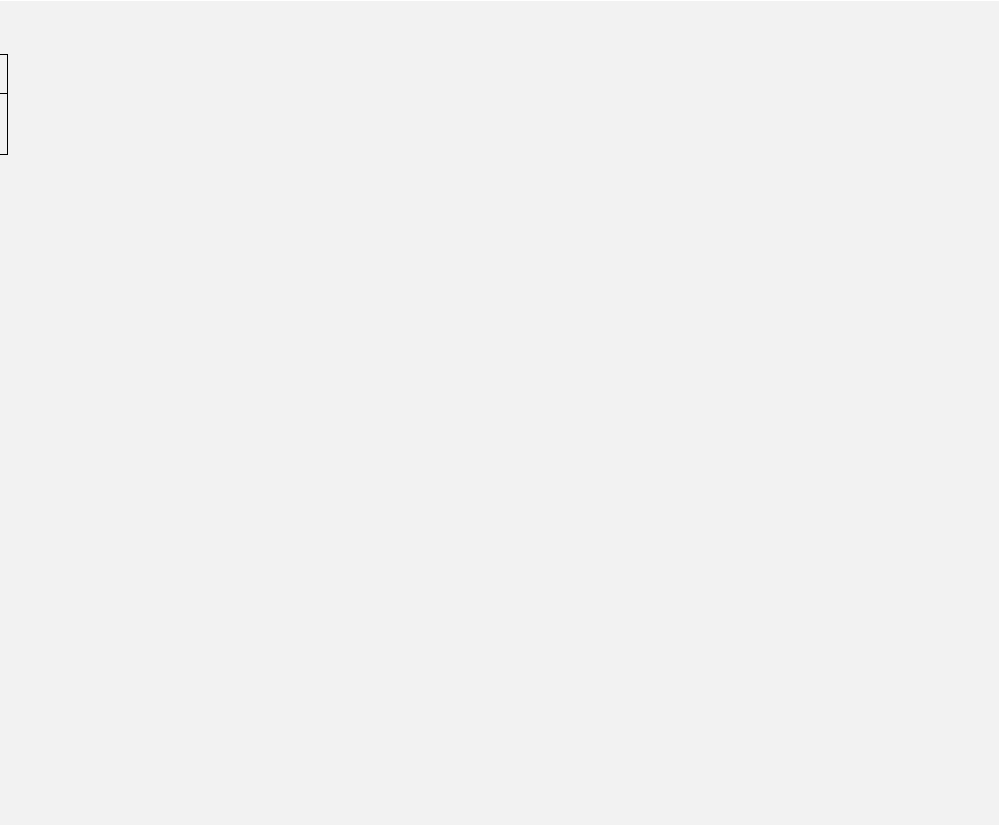

|                                               |        |        |     |     |      |      |                                         |
|-----------------------------------------------|--------|--------|-----|-----|------|------|-----------------------------------------|
| Each fatality                                 |        |        |     |     |      |      | person-year discounted at 3% per annum. |
| Health care incurred with each non-fatal case | \$7.80 | \$7.00 | n/a | n/a | [76] | [75] | N/a                                     |

23

1  
2  
3  
4  
5  
6  
7  
8  
9  
10  
11  
12  
13  
14  
15  
16  
17  
18  
19  
20  
21  
22  
23  
24  
25  
26  
27  
28  
29  
30  
31  
32  
33  
34  
35  
36  
37  
38  
39  
40  
41  
42  
43  
44  
45  
46  
47  
48  
49  
50  
51  
52  
53  
54  
55  
56  
57  
58  
59  
60

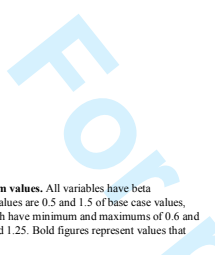

Table 2. Sensitivity analysis variables, base case, minimum and maximum values. All variables have beta distributions with alpha and beta parameters of 2. Minimum and maximum values are 0.5 and 1.5 of base case values, respectively, except for access to diarrhoea disease care and malaria care which have minimum and maximums of 0.6 and 1.4, and access to HIV ART which has a minimum and maximum of 0.75 and 1.25. Bold figures represent values that change with each country.

| Input parameter                     | Nigeria   |          |          | Kenya     |          |          | Bangladesh |          |          |
|-------------------------------------|-----------|----------|----------|-----------|----------|----------|------------|----------|----------|
|                                     | Base case | Min      | Max      | Base case | Min      | Max      | Base case  | Min      | Max      |
| Campaign cost                       | \$40,479  | \$20,239 | \$60,718 | \$34,280  | \$17,140 | \$51,420 | \$35,658   | \$17,829 | \$53,486 |
| Cost per fatality malaria           | \$97.50   | \$48.75  | \$146.25 | \$65.00   | \$32.50  | \$97.50  | \$72.22    | \$36.11  | \$108.33 |
| Cost per fatality diarrhoea         | \$156.00  | \$78.00  | \$234.00 | \$104.00  | \$52.00  | \$156.00 | \$115.56   | \$57.78  | \$173.34 |
| Cost per non-fatal case malaria     | \$11.70   | \$5.85   | \$17.55  | \$7.80    | \$3.90   | \$11.70  | \$8.67     | \$4.33   | \$13.00  |
| Cost per non-fatal case diarrhoea   | \$10.50   | \$5.25   | \$15.75  | \$7.00    | \$3.50   | \$10.50  | \$7.78     | \$3.89   | \$11.67  |
| Annual cost ART                     | \$938     | \$469    | \$1,407  | \$766     | \$383    | \$1,150  | \$766      | \$383    | \$1,150  |
| Discount rate                       | 0.03      | 0.015    | 0.045    | 0.03      | 0.015    | 0.045    | 0.03       | 0.015    | 0.045    |
| Access to care Diarrhoea            | 0.565     | 0.424    | 0.706    | 0.678     | 0.509    | 0.848    | 0.663      | 0.497    | 0.829    |
| Access to care Malaria              | 0.684     | 0.583    | 0.855    | 0.684     | 0.583    | 0.855    | 0.684      | 0.583    | 0.855    |
| Access to ART                       | 0.7       | 0.42     | 0.98     | 0.7       | 0.42     | 0.98     | 0.7        | 0.42     | 0.98     |
| Years on ART                        | 22        | 11       | 33       | 22        | 11       | 33       | 22         | 11       | 33       |
| HIV prevalence                      | 0.036     | 0.018    | 0.054    | 0.063     | 0.032    | 0.095    | 0.0006     | 0.0003   | 0.0009   |
| Baseline cases p1000py Malaria      | 351.6     | 175.8    | 527.5    | 57.0      | 28.5     | 85.5     | 6.13       | 3.06     | 9.19     |
| Baseline cases p1000py Diarrhoea    | 765.3     | 382.7    | 1148.0   | 542.0     | 271.0    | 813.0    | 299.81     | 149.91   | 449.72   |
| Propor fatal Malaria                | 0.006     | 0.004    | 0.012    | 0.012     | 0.006    | 0.018    | 0.004      | 0.002    | 0.006    |
| Propor fatal Diarrhoea              | 0.001     | 0.001    | 0.002    | 0.001     | 0.001    | 0.002    | 0.0007     | 0.0004   | 0.0011   |
| Participants per HH                 | 2.5       | 1.25     | 3.75     | 2.5       | 1.25     | 3.75     | 2.5        | 1.25     | 3.75     |
| DALYs fatal malaria                 | 27.8      | 13.9     | 41.7     | 27.8      | 13.9     | 41.7     | 27.8       | 13.9     | 41.7     |
| DALYs fatal diarrhoea               | 27.8      | 13.9     | 41.7     | 27.8      | 13.9     | 41.7     | 27.8       | 13.9     | 41.7     |
| DALYs non-fatal malaria             | 0.366     | 0.183    | 0.549    | 0.366     | 0.183    | 0.549    | 0.366      | 0.183    | 0.549    |
| DALYs non-fatal diarrhoea           | 0.127     | 0.064    | 0.191    | 0.127     | 0.064    | 0.191    | 0.127      | 0.064    | 0.191    |
| Protect. mortality malaria          | 0.500     | 0.250    | 0.750    | 0.500     | 0.250    | 0.750    | 0.500      | 0.250    | 0.750    |
| Protect. mortality diarrhoea        | 0.630     | 0.315    | 0.945    | 0.630     | 0.315    | 0.945    | 0.630      | 0.315    | 0.945    |
| Protect. non fatal malaria          | 0.500     | 0.250    | 0.750    | 0.500     | 0.250    | 0.750    | 0.500      | 0.250    | 0.750    |
| Protect. non fatal diarrhoea        | 0.628     | 0.314    | 0.941    | 0.628     | 0.314    | 0.941    | 0.628      | 0.314    | 0.941    |
| Protect. mortality HIV transmission | 0.500     | 0.250    | 0.750    | 0.500     | 0.250    | 0.750    | 0.500      | 0.250    | 0.750    |
| Protect. mortality HIV acquisition  | 0.255     | 0.128    | 0.383    | 0.255     | 0.128    | 0.383    | 0.255      | 0.128    | 0.383    |

24

1  
2  
3  
4  
5  
6  
7  
8  
9  
10  
11  
12  
13  
14  
15  
16  
17  
18  
19  
20  
21  
22  
23  
24  
25  
26  
27  
28  
29  
30  
31  
32  
33  
34  
35  
36  
37  
38  
39  
40  
41  
42  
43  
44  
45  
46  
47  
48  
49  
50  
51  
52  
53  
54  
55  
56  
57  
58  
59  
60

FOR

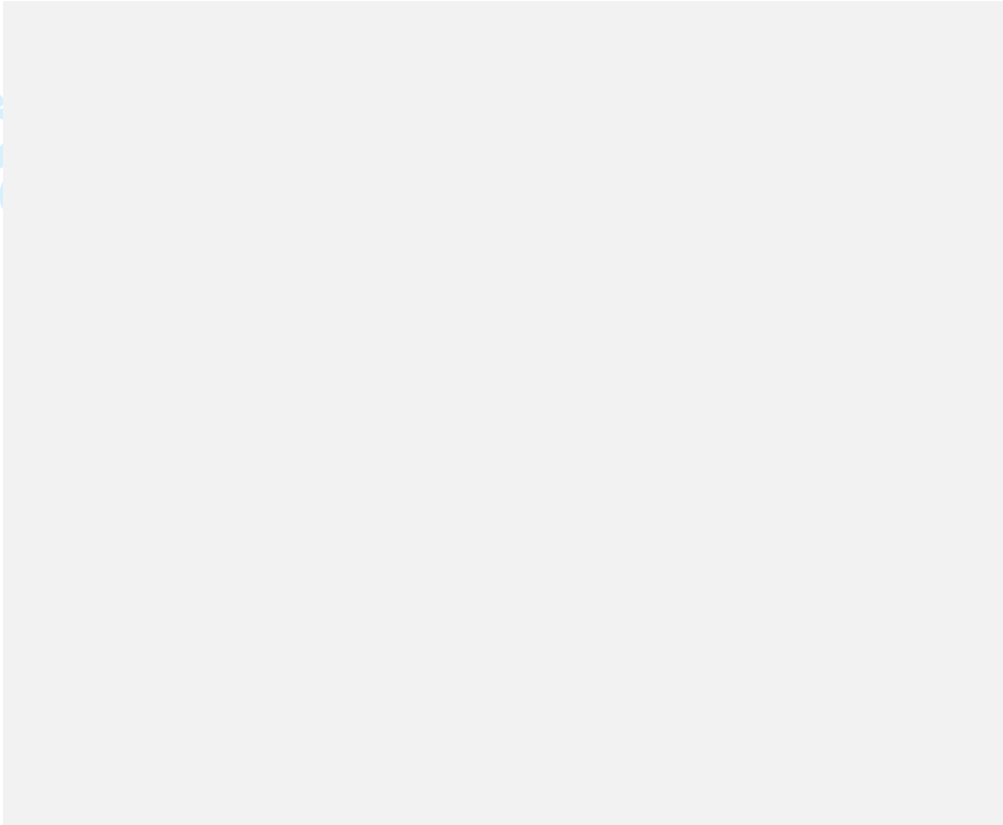

|                                   |   |     |     |   |     |     |   |     |     |
|-----------------------------------|---|-----|-----|---|-----|-----|---|-----|-----|
| Multiplier: Secondary effects HIV | 2 | 1   | 3   | 2 | 1   | 3   | 2 | 1   | 3   |
| Duration of benefit malaria       | 3 | 1.5 | 4.5 | 3 | 1.5 | 4.5 | 3 | 1.5 | 4.5 |
| Duration of benefit diarrhoea     | 3 | 1.5 | 4.5 | 3 | 1.5 | 4.5 | 3 | 1.5 | 4.5 |
| Duration of benefit HIV           | 1 | 0.5 | 1.5 | 1 | 0.5 | 1.5 | 1 | 0.5 | 1.5 |

25

1  
2  
3  
4  
5  
6  
7  
8  
9  
10  
11  
12  
13  
14  
15  
16  
17  
18  
19  
20  
21  
22  
23  
24  
25  
26  
27  
28  
29  
30  
31  
32  
33  
34  
35  
36  
37  
38  
39  
40  
41  
42  
43  
44  
45  
46  
47  
48  
49  
50  
51  
52  
53  
54  
55  
56  
57  
58  
59  
60

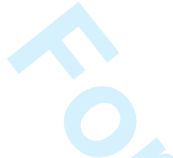

Table 3. Summary costs and cost-effectiveness results per 1,000 IPC participants for 70 countries ordered from most favorable to least favorable cost-effectiveness (net cost per DALY averted). The grey highlighted cells indicate CE ratio is less favorable than investment in ART. Results shown are for the first 3-year campaign.

| Country           | World Bank income classification | DALYs per capita | Costs     |           | Disease averted |          | Cost-effectiveness (CE) |                                |                           |           |
|-------------------|----------------------------------|------------------|-----------|-----------|-----------------|----------|-------------------------|--------------------------------|---------------------------|-----------|
|                   |                                  |                  | IPC cost  | Net cost  | Deaths          | Episodes | DALYs averted           | Campaign cost per DALY averted | Net cost per DALY averted | CE of ART |
| Guinea-Bissau     | Low                              | 0.134            | \$29,459  | \$7,814   | 40.7            | 10,523   | 1,143.3                 | \$26                           | \$7                       | \$1,005   |
| Senegal           | Lower middle                     | 0.050            | \$34,969  | \$12,190  | 10.7            | 5,735    | 306.0                   | \$114                          | \$40                      | \$768     |
| Sierra Leone      | Low                              | 0.119            | \$31,525  | \$20,112  | 16.0            | 4,118    | 446.7                   | \$71                           | \$45                      | \$764     |
| Burkina Faso      | Low                              | 0.126            | \$31,525  | \$22,206  | 16.4            | 4,124    | 459.4                   | \$69                           | \$48                      | \$819     |
| Somalia           | Low                              | 0.121            | \$26,015  | \$22,754  | 16.8            | 3,682    | 470.5                   | \$55                           | \$48                      | \$1,535   |
| Niger             | Low                              | 0.110            | \$23,081  | \$21,620  | 14.8            | 4,967    | 419.7                   | \$67                           | \$52                      | \$1,395   |
| Mali              | Low                              | 0.124            | \$29,459  | \$23,016  | 15.9            | 4,222    | 445.8                   | \$66                           | \$52                      | \$988     |
| Alghanistan       | Low                              | 0.057            | \$28,770  | \$18,908  | 12.7            | 4,146    | 356.6                   | \$81                           | \$53                      | \$935     |
| Chad              | Low                              | 0.120            | \$35,658  | \$24,848  | 15.3            | 4,335    | 424.6                   | \$64                           | \$59                      | \$807     |
| Lesotho           | Lower middle                     | 0.115            | \$35,658  | \$47,360  | 31.3            | 1,756    | 779.4                   | \$40                           | \$61                      | \$738     |
| Guinea            | Low                              | 0.095            | \$29,459  | \$22,324  | 12.6            | 4,272    | 353.8                   | \$83                           | \$63                      | \$928     |
| Congo, DR         | Low                              | 0.172            | \$23,037  | \$25,468  | 13.4            | 3,517    | 375.9                   | \$68                           | \$68                      | \$1,493   |
| Sudan             | Lower middle                     | 0.057            | \$38,413  | \$15,241  | 6.8             | 4,907    | 198.8                   | \$193                          | \$77                      | \$703     |
| Liberia           | Low                              | 0.092            | \$26,704  | \$25,528  | 11.9            | 3,401    | 332.6                   | \$80                           | \$77                      | \$1,025   |
| Burundi           | Low                              | 0.118            | \$26,015  | \$33,839  | 14.3            | 2,267    | 389.9                   | \$67                           | \$86                      | \$987     |
| Benin             | Low                              | 0.083            | \$33,591  | \$25,345  | 10.0            | 3,096    | 280.0                   | \$120                          | \$91                      | \$910     |
| Cote d'Ivoire     | Lower middle                     | 0.084            | \$33,591  | \$35,069  | 14.1            | 4,021    | 387.2                   | \$87                           | \$91                      | \$801     |
| Nigeria           | Lower middle                     | 0.133            | \$40,479  | \$34,769  | 13.4            | 3,103    | 369.3                   | \$110                          | \$84                      | \$747     |
| Mozambique        | Low                              | 0.141            | \$30,147  | \$55,145  | 22.2            | 3,816    | 590.0                   | \$51                           | \$100                     | \$1,109   |
| Ken. African Rep. | Low                              | 0.105            | \$27,392  | \$37,525  | 13.8            | 2,819    | 373.3                   | \$73                           | \$101                     | \$1,230   |
| Uganda            | Low                              | 0.105            | \$31,525  | \$40,192  | 14.9            | 3,482    | 399.8                   | \$79                           | \$101                     | \$749     |
| Congo, Rep.       | Lower middle                     | 0.067            | \$54,254  | \$33,944  | 11.5            | 2,981    | 318.5                   | \$170                          | \$107                     | \$756     |
| Togo              | Low                              | 0.075            | \$29,459  | \$32,147  | 10.4            | 2,849    | 288.7                   | \$102                          | \$111                     | \$864     |
| Angola            | Upper middle                     | 0.088            | \$64,586  | \$35,794  | 11.5            | 3,268    | 320.8                   | \$201                          | \$112                     | \$674     |
| Tanzania          | Low                              | 0.075            | \$33,591  | \$38,453  | 12.1            | 3,122    | 326.9                   | \$103                          | \$118                     | \$935     |
| Zambia            | Lower middle                     | 0.128            | \$33,591  | \$69,806  | 21.8            | 3,107    | 564.3                   | \$60                           | \$124                     | \$826     |
| Ethiopia          | Low                              | 0.057            | \$30,147  | \$29,830  | 8.6             | 1,986    | 235.7                   | \$128                          | \$126                     | \$1,139   |
| Rwanda            | Low                              | 0.071            | \$31,525  | \$34,034  | 9.6             | 2,216    | 266.1                   | \$118                          | \$128                     | \$768     |
| Malawi            | Low                              | 0.110            | \$28,081  | \$59,745  | 18.3            | 2,965    | 462.2                   | \$61                           | \$129                     | \$996     |
| Cameroon          | Lower middle                     | 0.100            | \$37,724  | \$52,388  | 14.5            | 3,115    | 388.4                   | \$97                           | \$135                     | \$741     |
| Kenya             | Low                              | 0.065            | \$34,280  | \$46,149  | 10.9            | 2,018    | 294.1                   | \$117                          | \$157                     | \$883     |
| Mauritania        | Lower middle                     | 0.042            | \$36,346  | \$26,177  | 5.8             | 2,607    | 164.2                   | \$221                          | \$171                     | \$955     |
| Yemen             | Lower middle                     | 0.025            | \$37,035  | \$21,136  | 4.5             | 3,126    | 122.9                   | \$301                          | \$172                     | \$719     |
| Zimbabwe          | Low                              | 0.075            | \$25,326  | \$76,203  | 17.8            | 1,682    | 428.8                   | \$59                           | \$178                     | \$1,731   |
| Pakistan          | Lower middle                     | 0.020            | \$41,856  | \$19,714  | 3.8             | 2,748    | 108.1                   | \$387                          | \$182                     | \$904     |
| Ghana             | Lower middle                     | 0.063            | \$44,812  | \$35,624  | 6.8             | 1,966    | 189.9                   | \$235                          | \$188                     | \$746     |
| Madagascar        | Low                              | 0.043            | \$28,770  | \$24,896  | 4.5             | 1,910    | 127.8                   | \$225                          | \$195                     | \$1,025   |
| Eritrea           | Low                              | 0.033            | \$27,392  | \$26,436  | 4.5             | 1,942    | 120.5                   | \$227                          | \$219                     | \$1,753   |
| Botswana          | Upper middle                     | 0.080            | \$137,566 | \$185,897 | 28.8            | 1,111    | 734.1                   | \$187                          | \$253                     | \$577     |
| Haiti             | Low                              | 0.028            | \$30,836  | \$31,570  | 4.4             | 3,128    | 723.0                   | \$251                          | \$257                     | \$869     |
| Swaziland         | Lower middle                     | 0.150            | \$58,387  | \$19,326  | 29.1            | 2,230    | 724.2                   | \$81                           | \$274                     | \$632     |

1  
2  
3  
4  
5  
6  
7  
8  
9  
10  
11  
12  
13  
14  
15  
16  
17  
18  
19  
20  
21  
22  
23  
24  
25  
26  
27  
28  
29  
30  
31  
32  
33  
34  
35  
36  
37  
38  
39  
40  
41  
42  
43  
44  
45  
46  
47  
48  
49  
50  
51  
52  
53  
54  
55  
56  
57  
58  
59  
60

FOR

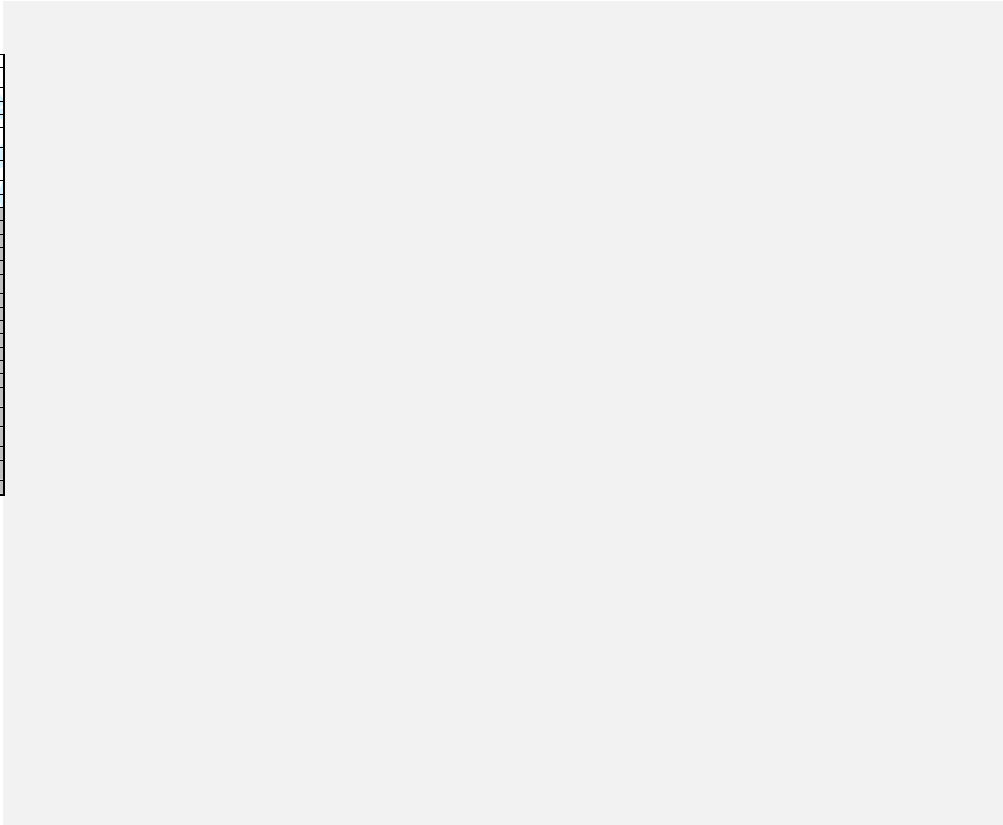

|    |                    |               |       |           |          |      |       |       |          |          |         |
|----|--------------------|---------------|-------|-----------|----------|------|-------|-------|----------|----------|---------|
| 20 | Guatemala          | Lower middle  | 0.016 | \$57,696  | \$22,134 | 2.4  | 3,143 | 70.1  | \$823    | \$316    | \$627   |
| 21 | South Africa       | Upper middle  | 0.097 | \$99,713  | \$180,28 | 21.5 | 1,150 | 561.0 | \$178    | \$321    | \$582   |
| 22 | Gabon              | Upper middle  | 0.060 | \$29,826  | \$84,308 | 9.3  | 1,876 | 255.0 | \$117    | \$331    | \$613   |
| 23 | India              | Lower middle  | 0.027 | \$48,744  | \$34,973 | 3.7  | 1,255 | 104.9 | \$464    | \$333    | \$733   |
| 24 | Myanmar            | Low           | 0.028 | \$31,525  | \$28,249 | 2.9  | 1,306 | 83.7  | \$377    | \$337    | \$1,354 |
| 25 | Papua New Guinea   | Lower middle  | 0.018 | \$40,479  | \$25,117 | 2.4  | 2,868 | 71.2  | \$568    | \$353    | \$664   |
| 26 | Iran               | Upper middle  | 0.009 | \$53,565  | \$25,989 | 1.9  | 2,587 | 55.8  | \$960    | \$466    | \$758   |
| 27 | Namibia            | Upper middle  | 0.038 | \$75,606  | \$204,27 | 15.6 | 1,528 | 402.7 | \$188    | \$507    | \$606   |
| 28 | Cambodia           | Low           | 0.014 | \$38,413  | \$31,172 | 1.9  | 1,341 | 54.3  | \$708    | \$574    | \$739   |
| 29 | Nepal              | Low           | 0.010 | \$30,836  | \$28,994 | 1.4  | 1,135 | 39.8  | \$776    | \$729    | \$883   |
| 30 | Morocco            | Lower middle  | 0.008 | \$58,387  | \$42,818 | 1.9  | 1,623 | 54.8  | \$1,066  | \$782    | \$660   |
| 31 | Bangladesh         | Low           | 0.007 | \$35,658  | \$30,236 | 0.9  | 1,076 | 25.9  | \$1,377  | \$1,168  | \$1,046 |
| 32 | Algeria            | Upper middle  | 0.008 | \$73,549  | \$51,390 | 1.4  | 1,304 | 41.9  | \$1,793  | \$1,253  | \$806   |
| 33 | Luxembourg         | Lower middle  | 0.006 | \$45,989  | \$25,837 | 0.6  | 2,352 | 19.2  | \$2,823  | \$1,406  | \$717   |
| 34 | Ukraine            | Lower middle  | 0.006 | \$74,228  | \$68,364 | 1.2  | 823   | 33.6  | \$2,210  | \$2,036  | \$600   |
| 35 | Thailand           | Upper middle  | 0.005 | \$90,759  | \$100,37 | 1.8  | 455   | 48.7  | \$1,863  | \$2,061  | \$622   |
| 36 | Indonesia          | Lower middle  | 0.008 | \$56,321  | \$46,877 | 0.7  | 814   | 20.8  | \$2,708  | \$2,244  | \$793   |
| 37 | Bolivia            | Lower middle  | 0.010 | \$56,321  | \$30,994 | 0.4  | 2,015 | 13.5  | \$4,178  | \$2,290  | \$668   |
| 38 | Vietnam            | Lower middle  | 0.005 | \$45,989  | \$40,910 | 0.6  | 828   | 17.6  | \$2,616  | \$2,327  | \$664   |
| 39 | Colombia           | Upper middle  | 0.003 | \$95,580  | \$63,657 | 0.6  | 1,419 | 20.5  | \$4,652  | \$3,098  | \$598   |
| 40 | Peru               | Upper middle  | 0.004 | \$95,580  | \$59,439 | 0.6  | 1,497 | 19.0  | \$5,026  | \$3,126  | \$613   |
| 41 | Brazil             | Upper middle  | 0.004 | \$164,534 | \$95,501 | 0.6  | 1,385 | 19.2  | \$5,431  | \$3,403  | \$581   |
| 42 | Philippines        | Lower middle  | 0.003 | \$51,499  | \$39,031 | 0.5  | 1,289 | 10.9  | \$4,746  | \$3,597  | \$724   |
| 43 | Russian Federation | High: nonOECD | 0.007 | \$143,794 | \$121,85 | 1.1  | 735   | 31.2  | \$4,607  | \$3,907  | \$579   |
| 44 | Argentina          | Upper middle  | 0.003 | \$147,238 | \$101,85 | 0.6  | 1,087 | 18.1  | \$8,155  | \$5,642  | \$577   |
| 45 | Malaysia           | Upper middle  | 0.004 | \$138,284 | \$104,40 | 0.6  | 930   | 17.6  | \$7,858  | \$5,933  | \$591   |
| 46 | Turkey             | Upper middle  | 0.001 | \$29,459  | \$58,058 | 0.1  | 1,784 | 6.1   | \$4,821  | \$9,501  | \$562   |
| 47 | Mexico             | Upper middle  | 0.003 | \$127,264 | \$134,90 | 0.3  | 0     | 9.8   | \$13,197 | \$13,989 | \$583   |
| 48 | China              | Upper middle  | 0.001 | \$84,560  | \$74,564 | 0.1  | 486   | 4.7   | \$18,015 | \$15,886 | \$638   |

FOR

1  
2  
3  
4  
5  
6  
7  
8  
9  
10  
11  
12  
13  
14  
15  
16  
17  
18  
19  
20  
21  
22  
23  
24  
25  
26  
27  
28  
29  
30  
31  
32  
33  
34  
35  
36  
37  
38  
39  
40  
41  
42  
43  
44  
45  
46  
47  
48  
49  
50  
51  
52  
53  
54  
55  
56  
57  
58  
59  
60

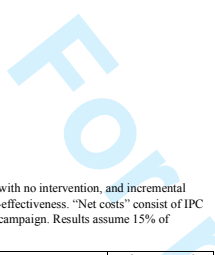

Table 4. IPC costs, DALYs averted, and cost-effectiveness compared with no intervention, and incremental cost-effectiveness for 70 countries in increments of 10, ranked by cost-effectiveness. "Net costs" consist of IPC campaign costs adjusted for medical costs averted or added due to the campaign. Results assume 15% of population covered by IPC in each country. Costs in 2012 US\$.  
28

| Countries | Campaign cost | Net cost  |           | DALYs averted |           | Cost-effectiveness (compared with no intervention) |         | Incremental cost-effectiveness (compared with previous row) |          |
|-----------|---------------|-----------|-----------|---------------|-----------|----------------------------------------------------|---------|-------------------------------------------------------------|----------|
|           |               | Camp. 1   | Camp. 2   | Camp. 1       | Camp. 2   | Camp. 1                                            | Camp. 2 | Camp. 1                                                     | Camp. 2  |
| Top 10    | 5.832E+08     | 3.979E+08 | 4.685E+08 | 8.048E+06     | 5.708E+06 | \$49                                               | \$82    | n/a                                                         | n/a      |
| Top 20    | 2.387E+09     | 2.054E+09 | 2.068E+09 | 2.706E+07     | 1.629E+07 | \$76                                               | \$127   | \$87                                                        | \$151    |
| Top 30    | 3.715E+09     | 3.554E+09 | 3.338E+09 | 3.961E+07     | 2.362E+07 | \$90                                               | \$140   | \$119                                                       | \$169    |
| Top 40*   | 5.614E+09     | 4.943E+09 | 4.858E+09 | 4.731E+07     | 2.916E+07 | \$104                                              | \$167   | \$181                                                       | \$284    |
| Top 50*   | 1.624E+10     | 1.342E+10 | 1.395E+10 | 7.265E+07     | 4.963E+07 | \$185                                              | \$280   | \$335                                                       | \$440    |
| Top 60    | 2.226E+10     | 1.863E+10 | 1.941E+10 | 7.573E+07     | 5.186E+07 | \$246                                              | \$374   | \$1,692                                                     | \$2,699  |
| Top 70    | 5.129E+10     | 4.350E+10 | 4.629E+10 | 7.871E+07     | 5.322E+07 | \$553                                              | \$870   | \$8,340                                                     | \$19,728 |





1  
2  
3  
4  
5  
6  
7  
8  
9  
10  
11  
12  
13  
14  
15  
16  
17  
18  
19  
20  
21  
22  
23  
24  
25  
26  
27  
28  
29  
30  
31  
32  
33  
34  
35  
36  
37  
38  
39  
40  
41  
42  
43  
44  
45  
46  
47  
48  
49  
50  
51  
52  
53  
54  
55  
56  
57  
58  
59  
60

For peer review only

Table 5. Median cost-effectiveness (net cost per DALY averted) by 10-country increments in order of cost-effectiveness

| Countries ranked by IPC cost-effectiveness | Campaign 1 | Campaign 2 | Antiretroviral therapy for HIV |
|--------------------------------------------|------------|------------|--------------------------------|
| Top 10                                     | \$50       | \$102      | \$854                          |
| 11 - 20                                    | \$88       | \$141      | \$958                          |
| 11 - 30                                    | \$121      | \$197      | \$797                          |
| 31 - 40                                    | \$185      | \$318      | \$894                          |
| 41 - 50                                    | \$335      | \$591      | \$683                          |
| 51 - 60                                    | \$1,721    | \$3,514    | \$666                          |
| 61 - 70                                    | \$4,774    | \$17,068   | \$587                          |



29

1  
2  
3  
4  
5  
6  
7  
8  
9  
10  
11  
12  
13  
14  
15  
16  
17  
18  
19  
20  
21  
22  
23  
24  
25  
26  
27  
28  
29  
30  
31  
32  
33  
34  
35  
36  
37  
38  
39  
40  
41  
42  
43  
44  
45  
46  
47  
48  
49  
50  
51  
52  
53  
54  
55  
56  
57  
58  
59  
60

For

Table 6. Multiway sensitivity analysis; 20,000-trial Monte Carlo simulation, 80% confidence interval for 3 IPC outcomes and cost per DALY averted by ART for HIV in Kenya, Bangladesh, and Nigeria.

| Outcomes                                       | Kenya              | Bangladesh          | Nigeria            |
|------------------------------------------------|--------------------|---------------------|--------------------|
| DALYs averted                                  | 206 - 407          | 13.1 - 45.8         | 228 - 564          |
| Net costs                                      | \$7 810 - \$70 885 | \$18 560 - \$41 473 | \$2 241 - \$61 448 |
| Net cost per DALY averted (cost-effectiveness) | \$23 - \$304       | \$519 - \$2 547     | \$5 - \$208        |
| Cost per DALY averted by ART for HIV           | \$883              | \$1,046             | \$747              |

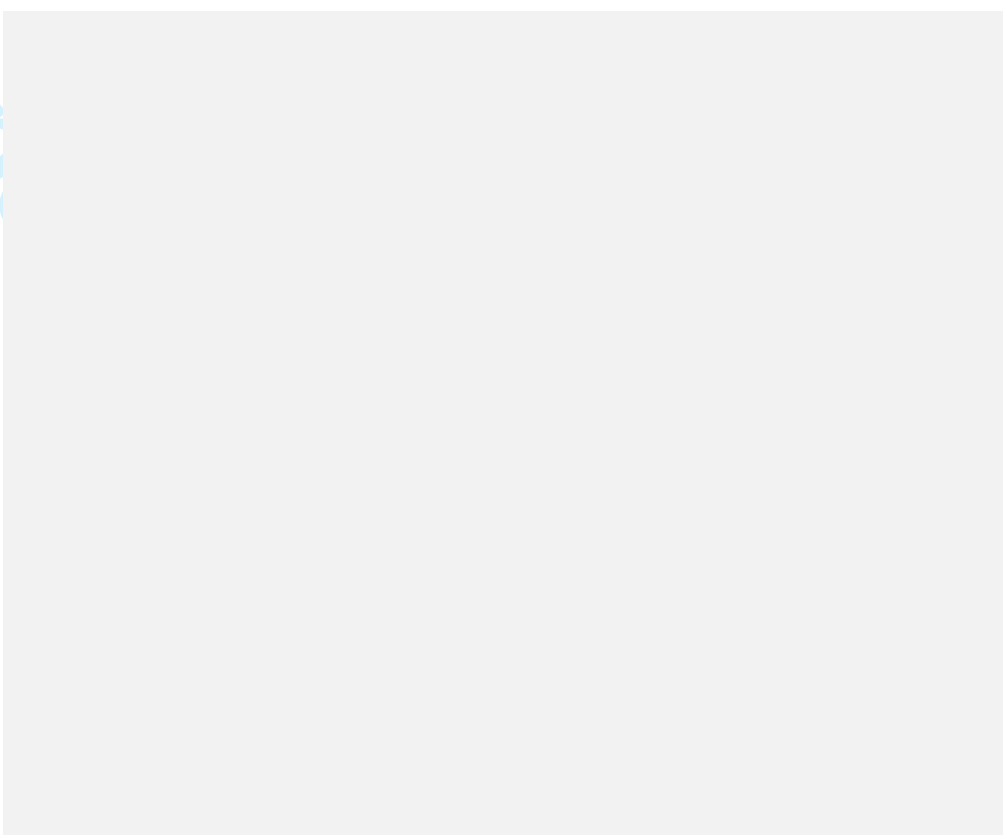

30

30
